# Supplementary material
Source: PubMed Central journal article supplement (PMC6964292)
Supplement: ao9b02663_si_001.pdf [file ao9b02663_si_001.pdf]

# Supplementary Information for

Identification of psychoactive metabolites from *Cannabis sativa*,  
its smoke and other phytocannabinoids using machine learning  
and multivariate methods

*Ramesh Jagannathan\**

International Medical Cannabis Association, Toronto, Ontario, M1S 5E8, CANADA

| Column1 | Positive/Negative/Cannabis Metabolite                       | AlogP   | apol      | naAromAtom |
|---------|-------------------------------------------------------------|---------|-----------|------------|
|         | <b>468 Metabolites and positive &amp; negative controls</b> |         |           |            |
| P1      | Acetorphine                                                 | 0.8863  | 75.96775  | 6          |
| P2      | Allylprodine                                                | 1.6988  | 51.05382  | 6          |
| P3      | Anileridine                                                 | 3.4358  | 61.1942   | 12         |
| P4      | Benzethidine                                                | 3.6685  | 63.323    | 12         |
| P5      | Betameprodine                                               | 0.6922  | 49.29382  | 6          |
| P6      | Bezitramide                                                 | 4.6735  | 81.90138  | 21         |
| P7      | Butyrfentanyl                                               | 2.321   | 63.48579  | 12         |
| P8      | Carfentanil                                                 | 2.3857  | 66.84979  | 12         |
| P9      | Clonitazene                                                 | 5.6538  | 58.72024  | 15         |
| P10     | Cocaine                                                     | 0.5592  | 48.23065  | 6          |
| P11     | Codeine                                                     | 1.408   | 49.18865  | 6          |
| P12     | Codoxime                                                    | 0.6615  | 57.41303  | 6          |
| P13     | Desomorphine                                                | 0.6077  | 46.62665  | 6          |
| P14     | Dextromoramide                                              | 1.8415  | 69.14138  | 12         |
| P15     | Diampromide                                                 | 3.327   | 58.6322   | 12         |
| P16     | Diethylthiambutene                                          | 4.5621  | 49.06265  | 10         |
| P17     | Difenoxin                                                   | 4.8927  | 71.7542   | 18         |
| P18     | Ethanol                                                     | -0.1076 | 8.322758  | 0          |
| P19     | Ethylmethylthiambutene                                      | 4.3117  | 45.96907  | 10         |
| P20     | Etonitazene                                                 | 5.1034  | 64.1962   | 15         |
| P21     | Etorphine                                                   | 0.7238  | 70.31217  | 6          |
| P22     | Fentanyl                                                    | 2.609   | 60.3922   | 12         |
| P23     | Heroin                                                      | 1.5712  | 57.40624  | 6          |
| P24     | Hydrocodone                                                 | 1.099   | 49.18865  | 6          |
| P25     | Hydromorphone                                               | 0.848   | 46.09507  | 6          |
| P26     | Isomethadone                                                | 3.1637  | 56.86541  | 12         |
| P27     | Ketobemidone                                                | 1.6366  | 43.10665  | 6          |
| P28     | Levomoramide                                                | 1.8415  | 69.14138  | 12         |
| P29     | Meperidine                                                  | 2.2159  | 43.10665  | 6          |
| P30     | Morphine                                                    | 1.157   | 46.09507  | 6          |
| P31     | Morphine-n-oxide (morphine oxide)                           | 0.7519  | 46.89707  | 6          |
| P32     | Oxycodone                                                   | 0.6599  | 49.99065  | 6          |
| P33     | Oxymorphone (dihydrooxymorphinone)                          | 0.4089  | 46.89707  | 6          |
| P34     | Propiram                                                    | -0.4678 | 48.93182  | 6          |
| P35     | Acetylmethadol                                              | 2.8914  | 63.854583 | 12         |
| P36     | AH-7921                                                     | 2.0966  | 50.191446 | 6          |
| P37     | Alphameprodine                                              | 0.6922  | 49.293825 | 6          |
| P38     | Alphaprodine                                                | 1.3684  | 46.200239 | 6          |
| P39     | Dextropropoxyphene                                          | 3.7425  | 60.760997 | 12         |

|     |                                    |         |           |    |
|-----|------------------------------------|---------|-----------|----|
| P40 | Phenadoxone                        | 2.7697  | 62.520997 | 12 |
| P41 | Phenampromide                      | 0.4425  | 50.258618 | 6  |
| P42 | Phenazocine                        | 4.0178  | 58.625411 | 12 |
| P43 | Phenomorphane                      | 2.6783  | 63.478997 | 12 |
| P44 | Phenoperidine                      | 3.0007  | 63.322997 | 12 |
| P45 | Piminodine                         | 3.5126  | 64.28779  | 12 |
| P46 | Piritramide                        | 0.9936  | 75.392962 | 12 |
| P47 | Proheptazine                       | 1.624   | 49.293825 | 6  |
| P48 | Properidine                        | 1.9154  | 46.200239 | 6  |
| P49 | Racemethorphan                     | 1.0902  | 50.251825 | 6  |
| P50 | Etoxidine                          | 1.5456  | 53.991411 | 6  |
| P51 | Remifentanyl                       | 0.5019  | 60.080204 | 6  |
| P52 | Sufentanyl                         | 1.9017  | 65.42779  | 11 |
| P53 | Thebacon                           | 1.1813  | 54.844239 | 6  |
| P54 | Thebaine                           | 1.7266  | 50.948653 | 6  |
| P55 | Thiofentanyl                       | 2.1764  | 58.438618 | 11 |
| P56 | Tilidine                           | 2.5192  | 47.960239 | 6  |
| P57 | Trimeperidine                      | 1.9013  | 49.293825 | 6  |
| P58 | U-47700                            | 1.5722  | 50.191446 | 6  |
| P59 | MT-45                              | 1.9428  | 65.777376 | 12 |
| P60 | Lysergide                          | 2.1491  | 55.971825 | 9  |
| P61 | Midomafetamine                     | 1.4423  | 32.065895 | 6  |
| P62 | Methaqualone                       | 3.847   | 40.497102 | 16 |
| P63 | Mescaline                          | 1.5245  | 34.201481 | 6  |
| E1  | N -arachidonoyl ethanolamine       | 0.4318  | 66.095341 | 0  |
| E2  | 2-arachidonoyl glycerol.           | 0.4648  | 69.026134 | 0  |
| E3  | Dihomo- g -linolenoyl ethanolamide | -0.9624 | 67.428927 | 0  |
| E4  | Docosatetraenoyl ethanolamide      | -0.1442 | 72.282513 | 0  |
| E5  | Arachidonyl glyceryl ether         | 0.0906  | 69.55772  | 0  |
| E6  | N -arachidonoyl dopamine           | 2.5303  | 80.124513 | 6  |
| E7  | N -oleoyl dopamine                 | -1.0763 | 77.938099 | 6  |
| E8  | Oleamide                           | -2.7377 | 56.919755 | 0  |
| E9  | O -arachidonoyl ethanolamine       | 0.6859  | 66.095341 | 0  |
| P64 | Nicotine                           | 0.0243  | 29.1351   | 6  |
| N1  | Acetate                            | -0.9077 | 7.124379  | 0  |
| N2  | Biotin                             | -1.2457 | 35.77469  | 0  |
| N3  | Choline                            | -1.5741 | 20.0371   | 0  |
| N4  | Glucose                            | -2.5134 | 23.37352  | 0  |
| N5  | Glutamate                          | -2.3176 | 18.44234  | 0  |
| N6  | Histidine                          | -1.0384 | 21.46514  | 5  |
| N7  | Isoleucine                         | -1.2501 | 21.93231  | 0  |

|     |                                                   |         |           |    |
|-----|---------------------------------------------------|---------|-----------|----|
| N8  | Lactate                                           | -1.4837 | 11.01997  | 0  |
| N9  | Leucine                                           | -0.3183 | 21.93231  | 0  |
| N10 | Lysine                                            | -2.7491 | 23.6991   | 0  |
| N11 | Methionine                                        | -0.7303 | 21.73872  | 0  |
| N12 | Phenylalanine                                     | 0.5898  | 25.87872  | 6  |
| N13 | Pyruvate                                          | -1.1715 | 9.686379  | 0  |
| N14 | Riboflavin                                        | -0.7277 | 52.46786  | 14 |
| N15 | Thiamine                                          | -1.4538 | 40.55748  | 11 |
| N16 | Tryptophan                                        | 0.8833  | 31.16552  | 9  |
| N17 | Tyrosine                                          | 0.4498  | 26.68072  | 6  |
| N18 | Valine                                            | -0.5739 | 18.83872  | 0  |
| T   | THC                                               | 1.8987  | 58.56779  | 6  |
| C1  | 1,1-Dimethylhydrazine                             | -0.3777 | 11.054344 | 0  |
| C2  | 1,2,3,4-Tetramethylbenzene                        | 3.7748  | 26.935102 | 6  |
| C3  | 1,2-Diethylbenzene                                | 2.1322  | 26.935102 | 6  |
| C4  | 1,3,5-Triazine-2,4,6-triamine                     | -1.1065 | 15.880758 | 6  |
| C5  | 1,3-Dichlorobenzene                               | 3.4136  | 17.587172 | 6  |
| C6  | 1,4-Diethylbenzene                                | 2.1322  | 26.935102 | 6  |
| C7  | 1-Butanol                                         | -0.9734 | 14.50993  | 0  |
| C8  | 1-Butoxy-2-Propanol                               | -1.115  | 24.592688 | 0  |
| C9  | Hexan-1-ol                                        | -1.5494 | 20.697102 | 0  |
| C10 | Undecan-1-ol                                      | -2.9894 | 36.165032 | 0  |
| C11 | 2,2,5-Trimethylhexane                             | 2.4471  | 29.17586  | 0  |
| C12 | 2,3,4-Trimethylpentane                            | 1.2792  | 26.082274 | 0  |
| C13 | 2,4,6-Trimethylphenol                             | 3.1486  | 24.643516 | 6  |
| C14 | 2,4-Ditert-butylphenol                            | 4.4908  | 40.111446 | 6  |
| C15 | 2,6-Diethylpyrazine                               | -0.0312 | 24.281516 | 6  |
| C16 | 2,5-Dimethylpyrazine                              | 0.7045  | 18.094344 | 6  |
| C17 | Butan-2-one                                       | -0.1678 | 13.176344 | 0  |
| C18 | 2-Butoxyethanol                                   | -1.1043 | 21.499102 | 0  |
| C19 | 1-(2-Chlorophenyl)Ethenone                        | 2.3617  | 21.729551 | 6  |
| C20 | 1,3-Dimethyl-2-Vinyl Benzene                      | 3.3541  | 25.601516 | 6  |
| C21 | 2-Ethoxyethanol                                   | -0.2385 | 15.31193  | 0  |
| C22 | 2-Ethyl-1-hexanol                                 | -1.2606 | 26.884274 | 0  |
| C23 | 2-Ethyl Toluene                                   | 2.4673  | 23.841516 | 6  |
| C24 | 2-Formyl-Delta-9-Tetrahydrocannabinol             | 2.3006  | 62.88979  | 6  |
| C25 | 2-Geranyl-5-Hydroxy-3-n-Pentanyl-1,4-Benzoquinone | 1.7063  | 59.36979  | 0  |
| C26 | 2-Heptanone                                       | -1.0318 | 22.457102 | 0  |
| C27 | 2-Hydroxy-Acetophenone                            | 1.4299  | 21.018344 | 6  |
| C28 | 2-Isopropyl-3-methyl-pyrazine                     | 1.0445  | 24.281516 | 6  |
| C29 | 2-Methylaziridine                                 | -0.4079 | 11.047551 | 0  |

|     |                                                                                                |         |           |    |
|-----|------------------------------------------------------------------------------------------------|---------|-----------|----|
| C30 | 2-Methylnaphthalene                                                                            | 3.2246  | 26.02793  | 10 |
| C31 | 2-Methyl-1H-imidazole                                                                          | 0.1589  | 13.240758 | 5  |
| C32 | 2-Methyl-Propanamine                                                                           | 0.2837  | 15.474723 | 0  |
| C33 | 2-Methylpentane                                                                                | 0.5918  | 19.895102 | 0  |
| C34 | 2-Nitropropane                                                                                 | 0.6002  | 12.651551 | 0  |
| C35 | 2-Phenoxy Ethanol                                                                              | 1.4016  | 22.35193  | 6  |
| C36 | 3-(1-Methyl Ethyl)-Phenol Carbamate                                                            | 2.2417  | 32.065895 | 6  |
| C37 | 3-(3-Hydroxy Phenyl)-2-Propenoic acid, methyl ester                                            | 1.9065  | 26.67393  | 6  |
| C38 | 3,4,5,6-Tetrahydro-7-hydroxy-a,a-2-trimethyl-9-n-propyl-2,6-methano-2H-1-Benzoxocin-5-methanol | 1.7344  | 54.516204 | 6  |
| C39 | 3,4,5-Trimethylphenol                                                                          | 3.0212  | 24.643516 | 6  |
| C40 | 3,4,5-Trimethylhex-1-ene                                                                       | 1.5472  | 27.842274 | 0  |
| C41 | 3-Ethyl Toulene                                                                                | 2.4673  | 23.841516 | 6  |
| C42 | 3-Ethyl-O-xylene                                                                               | 2.9535  | 26.935102 | 6  |
| C43 | 3-Hydroxy-Delta-4,5-Cannabichromene                                                            | 1.87    | 59.36979  | 6  |
| C44 | 3-Isopropyl Benzaldehyde                                                                       | 2.0065  | 26.403516 | 6  |
| C45 | 3-Methyl Acetophenone                                                                          | 2.0561  | 23.30993  | 6  |
| C46 | 3-Methyl Heptane                                                                               | -0.3724 | 26.082274 | 0  |
| C47 | 3-methylcyclopent-2-en-1-one                                                                   | 0.6409  | 16.696344 | 0  |
| C48 | 3-Methyl Pentane                                                                               | -0.34   | 19.895102 | 0  |
| C49 | 3-Methyl-5-(1-Methyl Ethyl)-Phenol Methyl Carbamate                                            | 2.7279  | 35.159481 | 6  |
| C50 | 3-Pentanol                                                                                     | -0.9841 | 17.603516 | 0  |
| C51 | 4,5-Dihydroxy-2,3,6-Trimethoxy-9,10-Dihydrophenanthrene                                        | 3.0872  | 45.932274 | 12 |
| C52 | 4,7-Dimethoxyphenanthrene-1,2,5-triol                                                          | 3.194   | 41.505102 | 14 |
| C53 | 4-Acetoxy Cannabichromene                                                                      | 3.2217  | 65.025376 | 6  |
| C54 | 4-Acetoxy-2-geranyl-5-hydroxy-3-n-pentylphenol                                                 | 3.3654  | 66.358962 | 6  |
| C55 | 4-Carene                                                                                       | 1.4126  | 28.268688 | 0  |
| C56 | 4-Ethoxy-3-anisaldehyde                                                                        | 2.0618  | 28.00752  | 6  |
| C57 | 4-Hydroxy-2,3,6,7-tetramethoxy-9,10dihydrophenanthrene                                         | 3.2108  | 49.02586  | 12 |
| C58 | 4-Methoxy-Couramin                                                                             | 2.3806  | 25.340344 | 10 |
| C59 | 4-Methyl Decane                                                                                | -0.6928 | 35.363032 | 0  |
| C60 | 4-Methylpyrimidine                                                                             | 0.56    | 15.000758 | 6  |
| C61 | 4-Methyl Guaiacol                                                                              | 2.1598  | 22.35193  | 6  |
| C62 | 4-Methyl Phenyl ethyl amine                                                                    | 1.6777  | 25.608309 | 6  |
| C63 | 4-Pyridinamine                                                                                 | 0.0602  | 15.000758 | 6  |
| C64 | 4-Terpinyl Delta-9-tetrahydrocannabinolate                                                     | 3.2437  | 90.200478 | 6  |
| C65 | 4-Terpenyl Cannabinolate                                                                       | 4.4531  | 87.533306 | 12 |

|      |                                                         |         |           |    |
|------|---------------------------------------------------------|---------|-----------|----|
| C66  | 5-Acetoxy-6-Geranyl-3n -Pentyl-1,4-Benzoquinone         | 1.7414  | 65.025376 | 0  |
| C67  | 5-Acetyl-4-Hydroxycannabigerol                          | 3.3654  | 66.358962 | 6  |
| C68  | 5-Ethenyl-2-Methylpyridine                              | 1.6946  | 21.181137 | 6  |
| C69  | 5-Methoxy Cannabigerolic acid                           | 3.335   | 66.358962 | 6  |
| C70  | 5-Methyl-4-Pentyl-Biphenyl-2,2,6-Triol                  | 2.3811  | 48.755446 | 12 |
| C71  | 5-Methylindane                                          | 1.8414  | 25.601516 | 6  |
| C72  | 5-Octanolide                                            | -1.2074 | 25.019102 | 0  |
| C73  | 6,7-cis -Epoxy-cannabigerol                             | 1.3057  | 60.97379  | 6  |
| C74  | 6,7-cis-Epoxy-cannabigerolic acid                       | 1.3057  | 60.97379  | 6  |
| C75  | 6a-R-Cannabichromanone B                                | 0.5919  | 59.640204 | 6  |
| C76  | 6a-R-Cannabichromanone C                                | 0.3617  | 56.546618 | 6  |
| C77  | 6-Metiltetrapterol A                                    | 5.5002  | 66.575032 | 18 |
| C78  | 6-Prenylapigenin                                        | 5.0943  | 51.212274 | 16 |
| C79  | 7,8-Dehydro-10-O-ethylcannabitrilol                     | 1.6178  | 65.025376 | 6  |
| C80  | 7,8-Dihydrocannabinol                                   | 2.3465  | 57.234204 | 6  |
| C81  | 7-Hydroxy Cannabichromane                               | 2.4105  | 60.703376 | 6  |
| C82  | 7-Hydroxy cannabinol                                    | 3.0955  | 56.702618 | 12 |
| C83  | 7-Methoxy Cannabispiranone                              | 1.2986  | 43.90186  | 6  |
| C84  | 7-R-Cannabicumarononic acid                             | 1.2904  | 61.400204 | 9  |
| C85  | 8,9-Dihydroxy-delta-6a-tetrahydrocannabinol             | 0.8747  | 60.17179  | 6  |
| C86  | 8-Hydroxy cannabinolic acid                             | 2.5818  | 60.066618 | 12 |
| C87  | 8-Hydroxyl cannabinol                                   | 3.0955  | 56.702618 | 12 |
| C88  | 8a-Hydroxy-Delta-9-tetrahydrocannbinol                  | 1.3256  | 59.36979  | 6  |
| C89  | 8-oxo-Delta-9-tetrahydrocannbinol                       | 1.3517  | 58.036204 | 6  |
| C90  | 9,10-Anhydrocannabitrilol                               | 1.5756  | 58.036204 | 6  |
| C91  | 9,10-Dihydro-2,3,5,6-Tetramethoxyphenanthrene-1,4-dione | 0.7574  | 48.494274 | 6  |
| C92  | 9 $\beta$ ,10 $\beta$ -Epoxyhexahydrocannabinol         | 1.3518  | 59.36979  | 6  |
| C93  | 10 $\alpha$ -Hydroxy-Delta- 9,11 -Hexahydrocannabinol   | 1.0823  | 59.36979  | 6  |
| C94  | 10-Ethoxy-9-hydroxy-delta-6a-Tetrahydrocannabinol       | 1.468   | 66.358962 | 6  |
| C95  | 10-Hydroxy-9-oxo-Delta-8-Tetrahydrocannabinol           | 1.3564  | 59.36979  | 6  |
| C96  | 10-O-Ethyl bis-nor Cannabitrilol                        | 1.5272  | 63.265376 | 6  |
| C97  | 10-Oxo-delta-6a-Tetrahydrocannabinol (OTHC)             | 1.5291  | 58.036204 | 6  |
| C98  | 11-Acetoxy-Delta-8-Tetrahydrocannbinoic acid            | 1.0904  | 68.389376 | 6  |
| C99  | 11-Acetoxy-Delta- 9 -Tetrahydrocannabinolic acid A      | 0.8008  | 68.389376 | 6  |
| C100 | Abnormal Cannabigerol                                   | 3.5977  | 59.901376 | 6  |
| C101 | Acetaldehyde                                            | -0.1825 | 6.989172  | 0  |
| C102 | Acetamide                                               | -0.6249 | 8.755965  | 0  |
| C103 | Acetic acid                                             | -0.2299 | 7.791172  | 0  |

|      |                                                   |         |            |    |
|------|---------------------------------------------------|---------|------------|----|
| C104 | Acetone                                           | -0.244  | 10.082758  | 0  |
| C105 | Acetyl abnormal hydrocannabigeroinol              | 3.3654  | 66.358962  | 6  |
| C106 | Acetyl cannabigeroinol                            | 1.7414  | 65.025376  | 0  |
| C107 | Acrolein                                          | 0.4084  | 8.749172   | 0  |
| C108 | Acetophenone                                      | 1.5699  | 20.216344  | 6  |
| C109 | Alloaromadendrene                                 | 2.1549  | 42.403032  | 0  |
| C110 | Alpha-Bisabolol                                   | 2.7502  | 44.538618  | 0  |
| C111 | $\alpha$ -Bulnescene                              | 2.3639  | 42.403032  | 0  |
| C112 | $\alpha$ -Cadinene                                | 2.407   | 42.403032  | 0  |
| C113 | $\alpha$ -Cadinyl Delta-9-tetrahydrocannabinolate | 3.6129  | 104.334822 | 6  |
| C114 | Alpha-Cannabispiranol                             | 0.2825  | 42.14186   | 6  |
| C115 | Alpha-Cedrene                                     | 2.4838  | 42.403032  | 0  |
| C116 | Alpha-Cis-Bergamotene                             | 2.7484  | 42.403032  | 0  |
| C117 | Alpha- Copaene                                    | 1.7635  | 42.403032  | 0  |
| C118 | Alpha-Cubebene                                    | 1.6446  | 42.403032  | 0  |
| C119 | Alpha-Eudesmol                                    | 1.5816  | 44.538618  | 0  |
| C120 | Alpha-Guaiene                                     | 2.3416  | 42.403032  | 0  |
| C121 | Alpha-Gurjunene                                   | 2.5253  | 42.403032  | 0  |
| C122 | Alpha-Humulene                                    | 4.1708  | 42.403032  | 0  |
| C123 | Alpha-Ionol                                       | 2.1533  | 38.351446  | 0  |
| C124 | Alpa-Linilenic acid                               | -0.0979 | 53.28779   | 0  |
| C125 | Alpha-Longipinene                                 | 1.8331  | 42.403032  | 0  |
| C126 | Alpha-Methyl-Cinnamaldehyde                       | 2.396   | 25.06993   | 6  |
| C127 | Alpha-Phellandrene                                | 1.7112  | 28.268688  | 0  |
| C128 | Alpha-Pinene                                      | 1.5162  | 28.268688  | 0  |
| C129 | Alpha-Selinene                                    | 2.6017  | 42.403032  | 0  |
| C130 | Alpha-Terpinyl Delta-9-tetrahydrocannabinolate    | 3.2437  | 90.200478  | 6  |
| C131 | Alpha-Terpinene                                   | 1.8841  | 28.268688  | 0  |
| C132 | Alpha-Terpineol                                   | 1.1223  | 30.404274  | 0  |
| C133 | Alpha-Thujene                                     | 1.6288  | 28.268688  | 0  |
| C134 | Alpha-Trans-Bergamotene                           | 2.7484  | 42.403032  | 0  |
| C135 | Alpha-Ylangene                                    | 1.7635  | 42.403032  | 0  |
| C136 | Amorfrutin-3                                      | 3.4803  | 56.973032  | 12 |
| C137 | Amorfrutin-4                                      | 5.6333  | 67.21179   | 12 |
| C138 | Amorfrutin-A                                      | 4.6521  | 56.171032  | 12 |
| C139 | Amorfrutin-B                                      | 5.8843  | 70.305376  | 12 |
| C140 | Anethole                                          | 2.6925  | 26.403516  | 6  |
| C141 | Anhydrocannabimovone                              | 1.2081  | 58.036204  | 6  |
| C142 | Anhydrocannabisativine                            | -2.2091 | 66.535341  | 0  |
| C143 | Anthopogochromenic acid                           | 4.2052  | 49.557446  | 6  |
| C144 | Anthopogocycloic acid                             | 3.0253  | 49.557446  | 6  |

|      |                                                            |         |            |    |
|------|------------------------------------------------------------|---------|------------|----|
| C145 | Apigenin                                                   | 3.3727  | 37.07793   | 16 |
| C146 | Arachidin-3                                                | 4.1537  | 49.18186   | 12 |
| C147 | Araphyn-1                                                  | 4.2937  | 48.37986   | 12 |
| C148 | Araphyn-3                                                  | 2.7985  | 52.119446  | 12 |
| C149 | Araphyn-4                                                  | 2.9385  | 51.317446  | 12 |
| C150 | Aristolene                                                 | 1.6486  | 42.403032  | 0  |
| C151 | Aromadendrene                                              | 2.1549  | 42.403032  | 0  |
| C152 | Benzaldehyde                                               | 1.5894  | 17.122758  | 6  |
| C153 | Benzonitrile                                               | 1.7089  | 16.753965  | 6  |
| C154 | Benzophenone                                               | 3.2342  | 30.34993   | 12 |
| C155 | Benzphetamine                                              | 3.5388  | 45.022653  | 12 |
| C156 | Benzyl acetate                                             | 1.6046  | 24.11193   | 6  |
| C157 | Benzyl Alcohol                                             | 1.2255  | 18.456344  | 6  |
| C158 | Benzyl formate                                             | 1.5258  | 21.018344  | 6  |
| C159 | Benzyl Nitrile                                             | 1.7437  | 19.847551  | 6  |
| C160 | Beta-Cannabispiranol                                       | 0.2825  | 42.14186   | 6  |
| C161 | Beta-Caryophyllene oxide                                   | 1.9144  | 43.205032  | 0  |
| C162 | Beta-Caryophyllene                                         | 3.2289  | 42.403032  | 0  |
| C163 | Beta-Cedrene                                               | 1.8851  | 42.403032  | 0  |
| C164 | Beta-Elemene                                               | 3.2309  | 42.403032  | 0  |
| C165 | Beta-Eudesmol                                              | 0.6981  | 44.538618  | 0  |
| C166 | Beta-fenchol (Beta-Fenchyl Alcohol)                        | 1.0088  | 30.404274  | 0  |
| C167 | Beta-Fenchyl-Delta-9-tetrahydrocannabinolate               | 2.4863  | 87.106892  | 6  |
| C168 | Betahistine                                                | 0.5837  | 24.281516  | 6  |
| C169 | Beta-Irone                                                 | 2.1914  | 40.111446  | 0  |
| C170 | Beta-phellandrene                                          | 1.5645  | 28.268688  | 0  |
| C171 | Beta-Pinene                                                | 1.3695  | 28.268688  | 0  |
| C172 | Beta-Selinene                                              | 1.7182  | 42.403032  | 0  |
| C173 | $\beta$ -sitosteryl-3-O-b-D-glucopyranoside-2'-O-palmitate | -3.7356 | 155.38537  | 0  |
| C174 | Betazole                                                   | -0.4358 | 18.101137  | 5  |
| C175 | Bis-nor-cannabichromanone                                  | 1.9998  | 52.651032  | 6  |
| C176 | Bis-nor-cannabielsoic acid B                               | 2.0669  | 56.546618  | 6  |
| C177 | Bis-nor-cannabielsoin                                      | 2.4532  | 53.182618  | 6  |
| C178 | Bis-nor-cannabitriol                                       | 1.2123  | 57.078204  | 6  |
| C179 | Borneol                                                    | 0.9432  | 30.404274  | 0  |
| C180 | Bornyl Delta-9-tetrahydrocannabinolate                     | 3.4159  | 104.334822 | 6  |
| C181 | Butane                                                     | -0.4734 | 13.70793   | 0  |
| C182 | Butyl formate                                              | -0.6731 | 17.07193   | 0  |
| C183 | Gamma-Cadinyl Cannabigerolate                              | 4.5973  | 108.761994 | 6  |
| C184 | Calarene                                                   | 2.3854  | 42.403032  | 0  |
| C185 | Camphene                                                   | 1.3875  | 28.268688  | 0  |



|      |                                             |        |           |    |
|------|---------------------------------------------|--------|-----------|----|
| C186 | Cannabichromanone (CBCF)                    | 0.8811 | 57.078204 | 6  |
| C187 | Cannabichromaonone D                        | 2.0924 | 58.036204 | 6  |
| C188 | Cannabichromene (CBC)                       | 3.3266 | 58.56779  | 6  |
| C189 | Cannabichromenic acid (CBCA)                | 2.8129 | 61.93179  | 6  |
| C190 | Cannabichromevarin (CBCV)                   | 3.9026 | 52.380618 | 6  |
| C191 | Cannabichromevarinic acid (CBCVA)           | 3.3889 | 55.744618 | 6  |
| C192 | Cannabicitran                               | 1.64   | 58.56779  | 6  |
| C193 | Cannabicoumaronone                          | 1.5493 | 58.036204 | 9  |
| C194 | Cannabicyclol (CBL)                         | 2.0193 | 58.56779  | 6  |
| C195 | Cannabicyclic acid (CBLA)                   | 1.7604 | 61.93179  | 6  |
| C196 | Cannabicyclovarin (CBLV)                    | 2.7227 | 52.380618 | 6  |
| C197 | Cannabidiol (CBD)                           | 2.5816 | 58.56779  | 6  |
| C198 | Cannabidiolic acid (CBDA)                   | 2.3227 | 61.93179  | 6  |
| C199 | Cannabidiol monomethylether (CBDM)          | 2.8326 | 61.66138  | 6  |
| C200 | Cannabidiorcol (CBD-C1)                     | 3.9739 | 46.193446 | 6  |
| C201 | Cannabidivarin (CBDV)                       | 3.1576 | 52.380618 | 6  |
| C202 | Cannabidivarinic acid (CBDVA)               | 2.8987 | 55.744618 | 6  |
| C203 | Cannabielsoic acid B (CBEA-B)               | 1.4909 | 62.73379  | 6  |
| C204 | Cannabielsoic acid A (CBEA-A)               | 1.4909 | 62.73379  | 6  |
| C205 | Cannabielsoin (CBE)                         | 1.7498 | 59.36979  | 6  |
| C206 | Cannabiflavin B                             | 5.3327 | 55.10786  | 16 |
| C207 | Cannabifuran (CBF)                          | 3.0632 | 55.900618 | 13 |
| C208 | Cannabigerol (CBG)                          | 3.5977 | 59.901376 | 6  |
| C209 | Cannabigerolic acid monomethylether (CBGAM) | 3.335  | 66.358962 | 6  |
| C210 | Cannabigerolic acid (CBGA)                  | 3.084  | 63.265376 | 6  |
| C211 | Cannabigerol monomethylether (CBGM)         | 3.8487 | 62.994962 | 6  |
| C212 | Cannabigeroquinone                          | 2.1627 | 58.56779  | 0  |
| C213 | Cannabigerovarin (CBGV)                     | 4.0463 | 53.714204 | 6  |
| C214 | Cannabigerovarinic acid (CBGVA)             | 3.66   | 57.078204 | 6  |
| C215 | Cannabiglendol                              | 1.6004 | 54.516204 | 6  |
| C216 | Cannabimovone                               | 0.8871 | 57.078204 | 6  |
| C217 | Cannabinerol                                | 3.5977 | 59.901376 | 6  |
| C218 | Cannabinerolic acid                         | 3.084  | 63.265376 | 6  |
| C219 | Cannabinodiol (CBND)                        | 3.5192 | 55.900618 | 12 |
| C220 | Cannabinodivarin (CBVD)                     | 4.0952 | 49.713446 | 12 |
| C221 | Cannabinol methylether (CBNM)               | 3.4865 | 58.994204 | 12 |
| C222 | Cannabinol (CBN)                            | 3.2355 | 55.900618 | 12 |
| C223 | Cannabinol-C2 (CBN-C2)                      | 4.2927 | 46.61986  | 12 |
| C224 | Cannabinol-C4 (CBN-C4)                      | 3.5235 | 52.807032 | 12 |
| C225 | Cannabinolic acid (CBNA)                    | 2.7218 | 59.264618 | 12 |
| C226 | Cannabiorcol (CBN-C1)                       | 4.5004 | 43.526274 | 12 |

|      |                                  |         |            |    |
|------|----------------------------------|---------|------------|----|
| C227 | Cannabiorcicchromene             | 4.7189  | 46.193446  | 6  |
| C228 | Cannabiorcicchromenic acid       | 4.3326  | 49.557446  | 6  |
| C229 | Cannabiorcicitran                | 3.1597  | 46.193446  | 6  |
| C230 | Cannabiorcicyclol                | 3.539   | 46.193446  | 6  |
| C231 | Cannabiorcicycloic acid          | 3.0253  | 49.557446  | 6  |
| C232 | Cannabioxepane                   | 3.2899  | 53.233446  | 13 |
| C233 | Cannabiripsol (CBR)              | 0.4579  | 61.505376  | 6  |
| C234 | Cannabissativine                 | -3.3243 | 68.670927  | 0  |
| C235 | Cannabisin-A                     | 5.737   | 88.45979   | 28 |
| C236 | Cannabisin-B                     | 5.0918  | 89.793376  | 24 |
| C237 | Cannabisin-C                     | 5.3428  | 92.886962  | 24 |
| C238 | Cannabisin-D                     | 5.5938  | 95.980548  | 24 |
| C239 | Cannabispirone                   | 1.175   | 40.808274  | 6  |
| C240 | Cannabitrinol (CBT)              | 0.8091  | 60.17179   | 6  |
| C241 | Cannabitrinolvarin (CBTV)        | 1.5251  | 53.182618  | 6  |
| C242 | Cannabivarin (CBV)               | 3.8115  | 49.713446  | 12 |
| C243 | Cannflavin A                     | 6.4375  | 69.242204  | 16 |
| C244 | Cannflavin B                     | 5.2053  | 55.10786   | 16 |
| C245 | Cannflavin C                     | 6.4375  | 69.242204  | 16 |
| C246 | Carbofuran                       | 2.5928  | 34.627895  | 6  |
| C247 | Carmagerol                       | 0.9936  | 62.838962  | 6  |
| C248 | Carvacrol                        | 2.5933  | 27.737102  | 6  |
| C249 | Carvone                          | 1.5954  | 27.737102  | 0  |
| C250 | CBDA-THC ester                   | 4.1699  | 119.967994 | 12 |
| C251 | Cedryl acetate                   | 1.7364  | 50.194204  | 0  |
| C252 | Cetyl Alcohol                    | -4.4294 | 51.632962  | 0  |
| C253 | Chiricanine B                    | 3.9259  | 52.275446  | 12 |
| C254 | Chlorocannabiorcicchromenic acid | 5.1244  | 51.070653  | 6  |
| C255 | Chrysoeriol                      | 3.4837  | 40.973516  | 16 |
| C256 | cis-2-Pinanol                    | 0.8417  | 30.404274  | 0  |
| C257 | cis-Beta-Farnesene               | 4.3258  | 42.403032  | 0  |
| C258 | cis-Gamma-Bisabolene             | 3.953   | 42.403032  | 0  |
| C259 | cis-Ocimene                      | 3.2403  | 28.268688  | 0  |
| C260 | cis-Sabinene Hydrate             | 0.9414  | 29.602274  | 0  |
| C261 | Citronellyl acetate              | 1.8432  | 37.393446  | 0  |
| C262 | Citronellolformate               | 1.7644  | 34.29986   | 0  |
| C263 | Compound-2                       | -0.1732 | 60.97379   | 6  |
| C264 | Compound-3                       | 0.6173  | 59.640204  | 6  |
| C265 | compound-4                       | 2.0924  | 58.036204  | 6  |
| C266 | Confluentin                      | 5.9511  | 60.32779   | 6  |
| C267 | Cumene                           | 2.2471  | 23.841516  | 6  |

|      |                                                        |         |           |    |
|------|--------------------------------------------------------|---------|-----------|----|
| C268 | Cuminaldehyde                                          | 2.0065  | 26.403516 | 6  |
| C269 | Daurichromenic acid                                    | 5.5648  | 63.69179  | 6  |
| C270 | Delta-9-tetrahydrocannabinolic acid (THCA-C1)          | 3.0321  | 49.557446 | 6  |
| C271 | Decanal                                                | -2.1223 | 31.73786  | 0  |
| C272 | Decarboxyamorfrutin A                                  | 5.1658  | 52.807032 | 12 |
| C273 | Decarboxyamorfrutin B                                  | 6.398   | 66.941376 | 12 |
| C274 | Dehydrocannabifuran (DCBF)                             | 3.7716  | 54.567032 | 13 |
| C275 | Delta-3-Carene                                         | 2.1434  | 28.268688 | 0  |
| C276 | Delta-7-cis-Isotetrahydrocannabivarin                  | 3.0263  | 52.380618 | 6  |
| C277 | Delta-7-trans-Isotetrahydrocannabinol                  | 2.4503  | 58.56779  | 6  |
| C278 | Delta-8-tetrahydrocannabinol ( $\Delta$ 8-THC)         | 2.0609  | 58.56779  | 6  |
| C279 | Delta-8-tetrahydrocannabinolic acid ( $\Delta$ 8-THCA) | 1.6398  | 61.93179  | 6  |
| C280 | Delta-9-cis-tetrahydrocannabivarin                     | 2.6021  | 52.380618 | 6  |
| C281 | Delta-9-nor-tetrahydrocannabinolic acid                | 2.4429  | 60.598204 | 6  |
| C282 | Delta-9-nor-tetrahydrocannabinol                       | 2.7018  | 57.234204 | 6  |
| C283 | Delta-9-Tetrahydrocannabinol-C4                        | 2.1867  | 55.4742   | 6  |
| C284 | Delta-9-tetrahydrocannabinol (THC-C1)                  | 3.291   | 46.193446 | 6  |
| C285 | Delta-9-tetrahydrocannabinolic acid A (THCA-A)         | 1.5124  | 61.93179  | 6  |
| C286 | Delta-9-tetrahydrocannabinolic acid B (THCA-B)         | 1.5124  | 61.93179  | 6  |
| C287 | Delta-9-tetrahydrocannabinolic acid-C4 (THCA-C4)       | 1.8004  | 58.838204 | 6  |
| C288 | Delta-Cadinene                                         | 2.2115  | 42.403032 | 0  |
| C289 | Demethylamorfrutin A                                   | 4.4011  | 53.077446 | 12 |
| C290 | Demethyldecarboxyamorfrutin A                          | 4.7874  | 49.713446 | 12 |
| C291 | Deprenyl O-methyl cannabigerolic acid                  | 2.1028  | 52.224618 | 6  |
| C292 | Desmodianone A                                         | 5.5913  | 69.242204 | 12 |
| C293 | Desmodianone C                                         | 5.735   | 70.57579  | 12 |
| C294 | Desmodianone D                                         | 4.4114  | 69.242204 | 12 |
| C295 | Desmodianone E                                         | 4.1634  | 69.242204 | 12 |
| C296 | Diacetone alcohol                                      | -0.0853 | 20.16552  | 0  |
| C297 | Dibutyl phthalate                                      | 0.3286  | 46.03745  | 6  |
| C298 | Diethyl Phthalate                                      | 2.0602  | 33.6631   | 6  |
| C299 | Dimethylbenzylcarbiny acetate                          | 2.5083  | 33.39269  | 6  |
| C300 | Dimethylsulfone                                        | -0.2206 | 12.02476  | 0  |
| C301 | Dimethylsulfide                                        | 0.7952  | 10.42076  | 0  |
| C302 | Dodecane                                               | -2.7774 | 38.45662  | 0  |
| C303 | Dothiepin Sulfoxide                                    | 2.8277  | 52.24465  | 12 |
| C304 | Durene                                                 | 3.7748  | 26.9351   | 6  |
| C305 | Dyclocaïne                                             | 0.2744  | 52.38741  | 6  |
| C306 | epi-Bornyl Delta-9-tetrahydrocannabinolate             | 3.0646  | 90.20048  | 6  |
| C307 | Estragole                                              | 2.8139  | 26.40352  | 6  |
| C308 | Ethylacetate                                           | 0.2715  | 13.97834  | 0  |

|      |                             |         |          |    |
|------|-----------------------------|---------|----------|----|
| C309 | Ethylenediamine             | -1.4766 | 11.05434 | 0  |
| C310 | Ethylene oxide              | -0.1309 | 6.989172 | 0  |
| C311 | Ethylenimine                | -0.3972 | 7.953965 | 0  |
| C312 | Eudesmyl-Cannabigerolate    | 4.9875  | 105.6684 | 6  |
| C313 | Eugenol                     | 2.6739  | 27.20552 | 6  |
| C314 | Eugenyl acetate             | 2.709   | 32.8611  | 6  |
| C315 | Fenchone                    | 1.2557  | 29.07069 | 0  |
| C316 | Fenchyl Alcohol             | 1.0088  | 30.40427 | 0  |
| C317 | Ferruginene A               | 2.9177  | 61.93179 | 6  |
| C318 | Ferruginene B               | 3.4229  | 61.93179 | 6  |
| C319 | Ferruginene C               | 3.7495  | 61.12979 | 6  |
| C320 | Formic acid                 | -0.3087 | 4.697586 | 0  |
| C321 | Furfural                    | 1.1422  | 13.07117 | 5  |
| C322 | Furfurylmethylamphetamine   | 3.0916  | 40.97107 | 11 |
| C323 | Gamma-curcumene             | 3.512   | 42.40303 | 0  |
| C324 | Gamma-eudesmol              | 1.2945  | 44.53862 | 0  |
| C325 | Gamma-Gurjunene             | 2.6467  | 42.40303 | 0  |
| C326 | Gamma-Hexalactone           | -0.6314 | 18.83193 | 0  |
| C327 | Gamma-Muurolene             | 2.2603  | 42.40303 | 0  |
| C328 | Gamma-Terpinene             | 2.4017  | 28.26869 | 0  |
| C329 | Glepidotin C                | 3.6156  | 50.51545 | 12 |
| C330 | Globulol                    | 1.2587  | 44.53862 | 0  |
| C331 | Grossamide                  | 5.7825  | 95.98055 | 24 |
| C332 | Guajol                      | 1.6736  | 19.25834 | 6  |
| C333 | Heli-Cannabigenol           | 6.0196  | 63.84779 | 12 |
| C334 | Heptanal                    | -1.2583 | 22.4571  | 0  |
| C335 | Hexadecane                  | -3.9294 | 50.83096 | 0  |
| C336 | Hexahydrocannabinol         | 1.4701  | 59.90138 | 6  |
| C337 | Hexanal                     | -0.9703 | 19.36352 | 0  |
| C338 | Hexanoic acid, methyl ester | -0.7667 | 23.2591  | 0  |
| C339 | Hexanoic acid, propyl ester | -1.0941 | 29.44627 | 0  |
| C340 | Hexestrol                   | 2.5264  | 47.95345 | 12 |
| C341 | Hordenine                   | 2.0192  | 29.50389 | 6  |
| C342 | Hydroxy Heli-Cannabigerol   | 5.8796  | 64.64979 | 12 |
| C343 | Ipsdienol                   | 2.3273  | 29.07069 | 0  |
| C344 | Isoamyl alcohol             | -0.1638 | 17.60352 | 0  |
| C345 | Isobornyl acetate           | 1.3223  | 36.05986 | 0  |
| C346 | Isobornyl thiocynoacetate   | 1.8361  | 41.15307 | 0  |
| C347 | Isobutane                   | 1.0124  | 13.70793 | 0  |
| C348 | Isobutyraldehyde            | 0.5419  | 13.17634 | 0  |
| C349 | Isobutyrophenone            | 2.2943  | 26.40352 | 6  |

|      |                                           |         |          |    |
|------|-------------------------------------------|---------|----------|----|
| C350 | Isocannabitrol                            | 0.747   | 63.26538 | 6  |
| C351 | Isocyanatomethane                         | -0.8688 | 7.422379 | 0  |
| C352 | Isodurene                                 | 3.7748  | 26.9351  | 6  |
| C353 | Isoeugenol                                | 2.4251  | 27.20552 | 6  |
| C354 | Isolimonene                               | 2.232   | 28.26869 | 0  |
| C355 | Isoprene                                  | 1.8614  | 14.13434 | 0  |
| C356 | Isoquinoline                              | 1.7687  | 21.60755 | 10 |
| C357 | Kaempferol                                | 3.1053  | 37.87993 | 16 |
| C358 | Limonene oxide                            | 0.4229  | 29.87269 | 0  |
| C359 | Limonene                                  | 2.1424  | 28.26869 | 0  |
| C360 | Linalool                                  | 2.4692  | 30.40427 | 0  |
| C361 | Linalyl acetate                           | 2.8483  | 36.05986 | 0  |
| C362 | Linoleic acid                             | -0.9485 | 54.62138 | 0  |
| C363 | Longifolene                               | 1.8468  | 42.40303 | 0  |
| C364 | Luteolin                                  | 3.2327  | 37.87993 | 16 |
| C365 | Machaeridiol A                            | 5.0453  | 62.5142  | 12 |
| C366 | Machaeridiol B                            | 4.9053  | 63.3162  | 12 |
| C367 | Machaeridiol C                            | 5.1725  | 61.98262 | 15 |
| C368 | Machaeridiol D                            | 3.7233  | 62.78462 | 15 |
| C369 | m-Cymene                                  | 2.7333  | 26.9351  | 6  |
| C370 | Methacrolein                              | 0.9615  | 11.84276 | 0  |
| C371 | Methacrylic anhydride                     | 2.0932  | 23.15393 | 0  |
| C372 | Methyl acetate                            | 0.0211  | 10.88476 | 0  |
| C373 | Methyl acetylsalicylate                   | 1.5898  | 27.47593 | 6  |
| C374 | Methyl anthranilate                       | 1.0755  | 22.78514 | 6  |
| C375 | Methyl Benzoate                           | 1.6947  | 21.01834 | 6  |
| C376 | Methyl carbamate                          | 0.0183  | 9.557965 | 0  |
| C377 | Methyl heptadienone                       | 1.6634  | 22.88352 | 0  |
| C378 | Methyl heptanoate                         | -1.0547 | 26.35269 | 0  |
| C379 | Methyl Hydrazine                          | -0.9136 | 7.960758 | 0  |
| C380 | Methyl isoeugenol                         | 2.6761  | 30.2991  | 6  |
| C381 | Methyl Salicylate                         | 1.5547  | 21.82034 | 6  |
| C382 | Methyl valerate                           | -0.4787 | 20.16552 | 0  |
| C383 | Methylene Chloride                        | 1.0729  | 7.453586 | 0  |
| C384 | Methylen-bis-Delta-9-tetrahydrocannabinol | 4.1968  | 118.8956 | 12 |
| C385 | Methylisohexenyl ketone                   | 1.5927  | 24.2171  | 0  |
| C386 | m-Tert-Butyl Phenol                       | 3.0904  | 27.7371  | 6  |
| C387 | Myrcene                                   | 3.0936  | 28.26869 | 0  |
| C388 | Nerol                                     | 2.3397  | 30.40427 | 0  |
| C389 | Nerolidol                                 | 3.7014  | 44.53862 | 0  |
| C390 | Nitrobenzene                              | 2.4212  | 16.59797 | 6  |

|      |                                       |         |          |    |
|------|---------------------------------------|---------|----------|----|
| C391 | Nonanal                               | -1.8343 | 28.64427 | 0  |
| C392 | Nonane                                | -1.9134 | 29.17586 | 0  |
| C393 | nor-Cannabidiol                       | 2.8696  | 55.4742  | 6  |
| C394 | nor-Cannabinol                        | 3.5235  | 52.80703 | 12 |
| C395 | nor-Cannabivarin                      | 4.2927  | 46.61986 | 12 |
| C396 | N-p-Coumaroyltyramine                 | 3.0619  | 44.76148 | 12 |
| C397 | N-trans-feruloyltyramine              | 3.1729  | 48.65707 | 12 |
| C398 | Octanal                               | -1.5463 | 25.55069 | 0  |
| C399 | o-Cymene                              | 2.7333  | 26.9351  | 6  |
| C400 | o-Dimethyl Hydroquinone               | 1.9246  | 22.35193 | 6  |
| C401 | O-Guaiacol                            | 1.801   | 19.25834 | 6  |
| C402 | Oleic acid                            | -2.3427 | 55.95496 | 0  |
| C403 | O-Methyl Cannabigerol                 | 3.8487  | 62.99496 | 6  |
| C404 | O-Methyl Acetophenone                 | 2.0561  | 23.30993 | 6  |
| C405 | O-Pentyl-cannabidiol                  | 1.9292  | 74.03572 | 6  |
| C406 | O-Pentyl-Delta-9-tetrahydrocannabinol | 1.7614  | 75.79572 | 6  |
| C407 | O-Propyl-cannabidiol                  | 2.5052  | 67.84855 | 6  |
| C408 | O-Propyl-Delta-9-tetrahydrocannabinol | 2.3374  | 69.60855 | 6  |
| C409 | Orientin                              | 0.8412  | 59.11786 | 16 |
| C410 | O-Xylene                              | 2.8024  | 20.74793 | 6  |
| C411 | P-Acetanisole                         | 1.6809  | 24.11193 | 6  |
| C412 | P-Aminotoluene                        | 1.697   | 19.42114 | 6  |
| C413 | P-Cymene                              | 2.7333  | 26.9351  | 6  |
| C414 | Pentadecane                           | -3.6414 | 47.73738 | 0  |
| C415 | Pentamethylbenzene                    | 4.261   | 30.02869 | 6  |
| C416 | Pentanal                              | -0.6823 | 16.26993 | 0  |
| C417 | Perillaldehyde                        | 1.308   | 27.7371  | 0  |
| C418 | Perrottetinene                        | 4.448   | 62.5142  | 12 |
| C419 | Perrottetinenic acid                  | 4.1891  | 65.8782  | 12 |
| C420 | P-ethyl Toulene                       | 2.4673  | 23.84152 | 6  |
| C421 | Phenol                                | 1.69    | 15.36276 | 6  |
| C422 | Phenylethyl alcohol                   | 1.4811  | 21.54993 | 6  |
| C423 | Piperidine                            | -1.2612 | 17.23472 | 0  |
| C424 | Piperonal                             | 1.6123  | 20.48676 | 6  |
| C425 | P-Methyl Acetophenone                 | 2.0561  | 23.30993 | 6  |
| C426 | Propanal                              | -0.1063 | 10.08276 | 0  |
| C427 | Propofol                              | 2.5242  | 33.92427 | 6  |
| C428 | Propanoic acid,anhydride              | -0.0424 | 19.63393 | 0  |
| C429 | Propylamine                           | -0.975  | 12.38114 | 0  |
| C430 | Propylene Glycol                      | -0.9081 | 12.21834 | 0  |
| C431 | P-Tert-Butylphenol                    | 3.0904  | 27.7371  | 6  |

|      |                                    |         |          |    |
|------|------------------------------------|---------|----------|----|
| C432 | P-Xylene                           | 2.8024  | 20.74793 | 6  |
| C433 | Quercetin                          | 2.9653  | 38.68193 | 16 |
| C434 | rac-6'-Epoxy cannabinigerol        | 2.568   | 60.70338 | 6  |
| C435 | rac-6'-Epoxy cannabinigerolic acid | 2.0543  | 64.06738 | 6  |
| C436 | Radulanin A                        | 4.4331  | 48.37986 | 12 |
| C437 | Radulanin H                        | 4.0468  | 51.74386 | 12 |
| C438 | Radulanin I                        | 3.5328  | 48.37986 | 12 |
| C439 | Radulanin J                        | 3.5137  | 47.04627 | 12 |
| C440 | Radulanin K                        | 2.749   | 47.31669 | 12 |
| C441 | Radulanin L                        | 4.0383  | 49.18186 | 12 |
| C442 | Rhododaurichromanin A              | 4.3849  | 63.69179 | 6  |
| C443 | Roughanic acid                     | 0.4781  | 47.10062 | 0  |
| C444 | Sabinene                           | 1.0301  | 28.26869 | 0  |
| C445 | Salicylaldehyde                    | 1.4494  | 17.92476 | 6  |
| C446 | Sativene                           | 1.7772  | 42.40303 | 0  |
| C447 | Sesquicannabinigerol               | 4.8299  | 74.03572 | 6  |
| C448 | Stearidonic acid                   | 1.2963  | 51.9542  | 0  |
| C449 | Styrene                            | 2.3817  | 19.41434 | 6  |
| C450 | Tert-butyl alcohol                 | 0.5733  | 14.50993 | 0  |
| C451 | Terpinolene                        | 2.7208  | 28.26869 | 0  |
| C452 | tert-butyl-benzene                 | 3.2304  | 26.9351  | 6  |
| C453 | Tetrahydrocannabinol epoxide       | 1.3518  | 59.36979 | 6  |
| C454 | Tetrahydrozoline                   | 0.7261  | 35.74869 | 6  |
| C455 | Thymol                             | 2.5933  | 27.7371  | 6  |
| C456 | Toluene                            | 2.3162  | 17.65434 | 6  |
| C457 | Trans-alpha-farnesene              | 4.4725  | 42.40303 | 0  |
| C458 | Trans-Archidin-1                   | 4.0137  | 49.98386 | 12 |
| C459 | Trans-Archidin-2                   | 4.6474  | 50.51545 | 12 |
| C460 | Trans-gamma-bisabolene             | 3.953   | 42.40303 | 0  |
| C461 | Trans-ocimene                      | 3.2403  | 28.26869 | 0  |
| C462 | Tridecane                          | -3.0654 | 41.5502  | 0  |
| C463 | Tyramine                           | 1.0515  | 23.31672 | 6  |
| C464 | Undecane                           | -2.4894 | 35.36303 | 0  |
| C465 | Valencene                          | 2.676   | 42.40303 | 0  |
| C466 | Verbenone                          | 1.2447  | 27.7371  | 0  |
| C467 | Vitexin                            | 0.9812  | 58.31586 | 16 |
| C468 | N-trans-caffeoyltyramine           | 2.9219  | 45.56348 | 12 |
|      |                                    |         |          |    |
|      |                                    |         |          |    |

|     | <b>Metabolites from Machine Learning Methods<br/>(330) (used for MDS using CDK)</b>            |         |           |            |
|-----|------------------------------------------------------------------------------------------------|---------|-----------|------------|
|     |                                                                                                | AlogP   | apol      | naAromAtom |
| C2  | 1,2,3,4-tetramethylbenzene                                                                     | 3.7748  | 26.935102 | 6          |
| C3  | 1,2-diethylbenzene                                                                             | 2.1322  | 26.935102 | 6          |
| C5  | 1,3-dichlorobenzene                                                                            | 3.4136  | 17.587172 | 6          |
| C6  | 1,4-diethylbenzene                                                                             | 2.1322  | 26.935102 | 6          |
| C11 | 2,2,5-trimethylhexane                                                                          | 2.4471  | 29.17586  | 0          |
| C13 | 2,4,6-trimethylphenol                                                                          | 3.1486  | 24.643516 | 6          |
| C14 | 2,4-ditert-butylphenol                                                                         | 4.4908  | 40.111446 | 6          |
| C15 | 2,6-diethylpyrazine                                                                            | -0.0312 | 24.281516 | 6          |
| C19 | 1-(2-chlorophenyl)ethenone                                                                     | 2.3617  | 21.729551 | 6          |
| C20 | 1,3-dimethyl-2-vinyl-benzene                                                                   | 3.3541  | 25.601516 | 6          |
| C23 | 2-Ethyl Toluene                                                                                | 2.4673  | 23.841516 | 6          |
| C24 | 2-Formyl-Delta-9-Tetrahydrocannabinol                                                          | 2.3006  | 62.88979  | 6          |
| C25 | 2-Geranyl-5-Hydroxy-3-n-Pentanyl-1,4-Benzoquinone                                              | 1.7063  | 59.36979  | 0          |
| C27 | 2-Hydroxy-Acetophenone                                                                         | 1.4299  | 21.018344 | 6          |
| C28 | 2-isopropyl-3-methyl-pyrazine                                                                  | 1.0445  | 24.281516 | 6          |
| C30 | 2-methylnaphthalene                                                                            | 3.2246  | 26.02793  | 10         |
| C35 | 2-Phenoxy Ethanol                                                                              | 1.4016  | 22.35193  | 6          |
| C36 | 3-(1-Methyl Ethyl)-Phenol Carbamate                                                            | 2.2417  | 32.065895 | 6          |
| C37 | 3-(3-Hydroxy Phenyl)-2-Propenoic acid, methyl ester                                            | 1.9065  | 26.67393  | 6          |
| C38 | 3,4,5,6-tetrahydro-7-hydroxy-a,a-2-trimethyl-9-n-propyl-2,6-methano-2H-1-Benzoxocin-5-methanol | 1.7344  | 54.516204 | 6          |
| C39 | 3,4,5-trimethylphenol                                                                          | 3.0212  | 24.643516 | 6          |
| C40 | 3,4,5-trimethylhex-1-ene                                                                       | 1.5472  | 27.842274 | 0          |
| C41 | 3-Ethyl Toulene                                                                                | 2.4673  | 23.841516 | 6          |
| C42 | 3-Ethyl-O-xylene                                                                               | 2.9535  | 26.935102 | 6          |
| C43 | 3-Hydroxy-Delta-4,5-Cannabichromene                                                            | 1.87    | 59.36979  | 6          |
| C44 | 3-Isopropyl Benzaldehyde                                                                       | 2.0065  | 26.403516 | 6          |
| C45 | 3-Methyl Acetophenone                                                                          | 2.0561  | 23.30993  | 6          |
| C46 | 3-Methyl Heptane                                                                               | -0.3724 | 26.082274 | 0          |
| C49 | 3-Methyl-5-(1-Methyl Ethyl)-Phenol Methyl Carbamate                                            | 2.7279  | 35.159481 | 6          |
| C51 | 4,5-Dihydroxy-2,3,6-Trimethoxy-9,10-Dihydrophenanthrene                                        | 3.0872  | 45.932274 | 12         |
| C52 | 4,7-dimethoxyphenanthrene-1,2,5-triol                                                          | 3.194   | 41.505102 | 14         |
| C53 | 4-Acetoxy Cannabichromene                                                                      | 3.2217  | 65.025376 | 6          |
| C54 | 4-Acetoxy-2-geranyl-5-hydroxy-3-n-pentylphenol                                                 | 3.3654  | 66.358962 | 6          |
| C55 | 4-Carene                                                                                       | 1.4126  | 28.268688 | 0          |



|      |                                                         |         |           |    |
|------|---------------------------------------------------------|---------|-----------|----|
| C56  | 4-Ethoxy-3-anisaldehyde                                 | 2.0618  | 28.00752  | 6  |
| C57  | 4-hydroxy-2,3,6,7-tetramethoxy-9,10dihydrophenanthrene  | 3.2108  | 49.02586  | 12 |
| C58  | 4-Methoxy-Couramin                                      | 2.3806  | 25.340344 | 10 |
| C59  | 4-Methyl Decane                                         | -0.6928 | 35.363032 | 0  |
| C61  | 4-Methyl Guaiacol                                       | 2.1598  | 22.35193  | 6  |
| C62  | 4-Methyl Phenyl ethyl amine                             | 1.6777  | 25.608309 | 6  |
| C64  | 4-Terpinyol Delta-9-tetrahydrocannabinolate             | 3.2437  | 90.200478 | 6  |
| C65  | 4-Terpenyl Cannabinolate                                | 4.4531  | 87.533306 | 12 |
| C66  | 5-acetoxy-6-geranyl-3n -pentyl-1,4-benzoquinone         | 1.7414  | 65.025376 | 0  |
| C67  | 5-Acetyl-4-hydroxycannabigerol                          | 3.3654  | 66.358962 | 6  |
| C68  | 5-ethenyl-2-methylpyridine                              | 1.6946  | 21.181137 | 6  |
| C70  | 5-Methyl-4-Pentyl-Biphenyl-2,2,6-Triol                  | 2.3811  | 48.755446 | 12 |
| C71  | 5-methylindane                                          | 1.8414  | 25.601516 | 6  |
| C72  | 5-Octanolide                                            | -1.2074 | 25.019102 | 0  |
| C75  | 6a-R-Cannabichromanone B                                | 0.5919  | 59.640204 | 6  |
| C76  | 6a-R-Cannabichromanone C                                | 0.3617  | 56.546618 | 6  |
| C79  | 7,8-Dehydro-10-O-ethylcannabitrilol                     | 1.6178  | 65.025376 | 6  |
| C80  | 7,8-dihydrocannabinol                                   | 2.3465  | 57.234204 | 6  |
| C81  | 7-Hydroxy Cannabichromane                               | 2.4105  | 60.703376 | 6  |
| C82  | 7-hydroxy cannabinol                                    | 3.0955  | 56.702618 | 12 |
| C83  | 7-Methoxy Cannabispiranone                              | 1.2986  | 43.90186  | 6  |
| C84  | 7-R-Cannabicumaronic acid                               | 1.2904  | 61.400204 | 9  |
| C85  | 8,9-Dihydroxy-delta-6a-tetrahydrocannabinol             | 0.8747  | 60.17179  | 6  |
| C87  | 8-hydroxyl cannabinol                                   | 3.0955  | 56.702618 | 12 |
| C88  | 8a-Hydroxy-Delta-9-tetrahydrocannabinol                 | 1.3256  | 59.36979  | 6  |
| C89  | 8-oxo-Delta-9-tetrahydrocannabinol                      | 1.3517  | 58.036204 | 6  |
| C90  | 9,10-Anhydrocannabitrilol                               | 1.5756  | 58.036204 | 6  |
| C91  | 9,10-dihydro-2,3,5,6-tetramethoxyphenanthrene-1,4-dione | 0.7574  | 48.494274 | 6  |
| C92  | 9 $\beta$ ,10 $\beta$ -Epoxyhexahydrocannabinol         | 1.3518  | 59.36979  | 6  |
| C93  | 10 $\alpha$ -Hydroxy-Delta- 9,11 -hexahydrocannabinol   | 1.0823  | 59.36979  | 6  |
| C94  | 10-Ethoxy-9-hydroxy-delta-6a-tetrahydrocannabinol       | 1.468   | 66.358962 | 6  |
| C95  | 10-Hydroxy-9-oxo-Delta-8-tetrahydrocannabinol           | 1.3564  | 59.36979  | 6  |
| C96  | 10-O-Ethyl bis-nor cannabitrilol                        | 1.5272  | 63.265376 | 6  |
| C97  | 10-Oxo-delta-6a-tetrahydrocannabinol (OTHC)             | 1.5291  | 58.036204 | 6  |
| C98  | 11-Acetoxy-Delta-8-tetrahydrocannabinoic acid           | 1.0904  | 68.389376 | 6  |
| C99  | 11-Acetoxy-Delta- 9 -tetrahydrocannabinolic acid A      | 0.8008  | 68.389376 | 6  |
| C100 | abnormal cannabigerol                                   | 3.5977  | 59.901376 | 6  |
| C105 | acetyl abnormal hydrocannabigeroquinol                  | 3.3654  | 66.358962 | 6  |

|      |                                                   |         |            |    |
|------|---------------------------------------------------|---------|------------|----|
| C106 | Acetyl cannabigerquinol                           | 1.7414  | 65.025376  | 0  |
| C108 | Acetophenone                                      | 1.5699  | 20.216344  | 6  |
| C109 | Alloaromadendrene                                 | 2.1549  | 42.403032  | 0  |
| C110 | Alpha-Bisabolol                                   | 2.7502  | 44.538618  | 0  |
| C111 | $\alpha$ -bulnescene                              | 2.3639  | 42.403032  | 0  |
| C112 | $\alpha$ -cadinene                                | 2.407   | 42.403032  | 0  |
| C113 | $\alpha$ -Cadinyl Delta-9-tetrahydrocannabinolate | 3.6129  | 104.334822 | 6  |
| C114 | Alpha-Cannabispiranol                             | 0.2825  | 42.14186   | 6  |
| C115 | Alpha-Cedrene                                     | 2.4838  | 42.403032  | 0  |
| C116 | Alpha-Cis-Bergamotene                             | 2.7484  | 42.403032  | 0  |
| C117 | Alpha- Copaene                                    | 1.7635  | 42.403032  | 0  |
| C118 | Alpha-Cubebene                                    | 1.6446  | 42.403032  | 0  |
| C119 | Alpha-Eudesmol                                    | 1.5816  | 44.538618  | 0  |
| C120 | Alpha-Guaiene                                     | 2.3416  | 42.403032  | 0  |
| C121 | Alpha-Gurjunene                                   | 2.5253  | 42.403032  | 0  |
| C122 | Alpha-Humulene                                    | 4.1708  | 42.403032  | 0  |
| C123 | Alpha-Ionol                                       | 2.1533  | 38.351446  | 0  |
| C124 | Alpa-Linilenic acid                               | -0.0979 | 53.28779   | 0  |
| C125 | Alpha-Longipinene                                 | 1.8331  | 42.403032  | 0  |
| C126 | Alpha-Methyl-Cinnamaldehyde                       | 2.396   | 25.06993   | 6  |
| C127 | Alpha-Phellandrene                                | 1.7112  | 28.268688  | 0  |
| C128 | Alpha-Pinene                                      | 1.5162  | 28.268688  | 0  |
| C129 | Alpha-Selinene                                    | 2.6017  | 42.403032  | 0  |
| C130 | Alpha-Terpinyl Delta-9-tetrahydrocannabinolate    | 3.2437  | 90.200478  | 6  |
| C131 | Alpha-Terpinene                                   | 1.8841  | 28.268688  | 0  |
| C132 | Alpha-Terpineol                                   | 1.1223  | 30.404274  | 0  |
| C133 | Alpha-Thujene                                     | 1.6288  | 28.268688  | 0  |
| C134 | $\alpha$ -trans-bergamotene                       | 2.7484  | 42.403032  | 0  |
| C135 | Alpha-Ylangene                                    | 1.7635  | 42.403032  | 0  |
| C139 | Amorfrutin-B                                      | 5.8843  | 70.305376  | 12 |
| C140 | Anethole                                          | 2.6925  | 26.403516  | 6  |
| C141 | Anhydrocannabimovone                              | 1.2081  | 58.036204  | 6  |
| C142 | anhydrocannabisativine                            | -2.2091 | 66.535341  | 0  |
| C146 | Arachidin-3                                       | 4.1537  | 49.18186   | 12 |
| C147 | Araphyn-1                                         | 4.2937  | 48.37986   | 12 |
| C149 | Araphyn-4                                         | 2.9385  | 51.317446  | 12 |
| C150 | Aristolene                                        | 1.6486  | 42.403032  | 0  |
| C151 | Aromadendrene                                     | 2.1549  | 42.403032  | 0  |
| C152 | benzaldehyde                                      | 1.5894  | 17.122758  | 6  |
| C153 | Benzonitrile                                      | 1.7089  | 16.753965  | 6  |
| C154 | Benzophenone                                      | 3.2342  | 30.34993   | 12 |

|      |                                              |        |            |    |
|------|----------------------------------------------|--------|------------|----|
| C155 | benzphetamine                                | 3.5388 | 45.022653  | 12 |
| C157 | Benzyl Alcohol                               | 1.2255 | 18.456344  | 6  |
| C158 | benzyl formate                               | 1.5258 | 21.018344  | 6  |
| C159 | Benzyl Nitrile                               | 1.7437 | 19.847551  | 6  |
| C160 | Beta-Cannabispiranol                         | 0.2825 | 42.14186   | 6  |
| C161 | Beta-Caryophyllene oxide                     | 1.9144 | 43.205032  | 0  |
| C162 | Beta-Caryophyllene                           | 3.2289 | 42.403032  | 0  |
| C163 | Beta-Cedrene                                 | 1.8851 | 42.403032  | 0  |
| C164 | Beta-Elemene                                 | 3.2309 | 42.403032  | 0  |
| C165 | Beta-Eudesmol                                | 0.6981 | 44.538618  | 0  |
| C167 | beta-Fenchyl-Delta-9-tetrahydrocannabinolate | 2.4863 | 87.106892  | 6  |
| C169 | Beta-Irone                                   | 2.1914 | 40.111446  | 0  |
| C170 | beta-phellandrene                            | 1.5645 | 28.268688  | 0  |
| C171 | Beta-Pinene                                  | 1.3695 | 28.268688  | 0  |
| C172 | Beta-Selinene                                | 1.7182 | 42.403032  | 0  |
| C175 | Bis-nor-cannabichromanone                    | 1.9998 | 52.651032  | 6  |
| C177 | Bis-nor-cannabielsoin                        | 2.4532 | 53.182618  | 6  |
| C178 | Bis-nor-cannabitol                           | 1.2123 | 57.078204  | 6  |
| C180 | Bornyl Delta-9-tetrahydrocannabinolate       | 3.4159 | 104.334822 | 6  |
| C184 | Calarene                                     | 2.3854 | 42.403032  | 0  |
| C185 | Camphene                                     | 1.3875 | 28.268688  | 0  |
| C186 | Cannabichromanone (CBCF)                     | 0.8811 | 57.078204  | 6  |
| C187 | Cannabichromonone D                          | 2.0924 | 58.036204  | 6  |
| C188 | Cannabichromene (CBC)                        | 3.3266 | 58.56779   | 6  |
| C189 | Cannabichromenic acid (CBCA)                 | 2.8129 | 61.93179   | 6  |
| C190 | Cannabichromevarin (CBCV)                    | 3.9026 | 52.380618  | 6  |
| C191 | Cannabichromevarinic acid (CBCVA)            | 3.3889 | 55.744618  | 6  |
| C192 | Cannabicitran                                | 1.64   | 58.56779   | 6  |
| C193 | cannabicomaronone                            | 1.5493 | 58.036204  | 9  |
| C194 | Cannabicyclol (CBL)                          | 2.0193 | 58.56779   | 6  |
| C195 | Cannabicyclic acid (CBLA)                    | 1.7604 | 61.93179   | 6  |
| C196 | Cannabicyclovarin (CBLV)                     | 2.7227 | 52.380618  | 6  |
| C197 | Cannabidiol (CBD)                            | 2.5816 | 58.56779   | 6  |
| C199 | Cannabidiol monomethylether (CBDM)           | 2.8326 | 61.661376  | 6  |
| C200 | Cannabidiorcol (CBD-C1)                      | 3.9739 | 46.193446  | 6  |
| C201 | Cannabidivarin (CBDV)                        | 3.1576 | 52.380618  | 6  |
| C204 | Cannabielsoic acid A (CBEA-A)                | 1.4909 | 62.73379   | 6  |
| C205 | Cannabielsoin (CBE)                          | 1.7498 | 59.36979   | 6  |
| C206 | cannabiflavin B                              | 5.3327 | 55.10786   | 16 |
| C207 | Cannabifuran (CBF)                           | 3.0632 | 55.900618  | 13 |
| C208 | Cannabigerol (CBG)                           | 3.5977 | 59.901376  | 6  |

|      |                                     |         |           |    |
|------|-------------------------------------|---------|-----------|----|
| C211 | Cannabigerol monomethylether (CBGM) | 3.8487  | 62.994962 | 6  |
| C212 | cannabigerone                       | 2.1627  | 58.56779  | 0  |
| C213 | Cannabigerovarin (CBGV)             | 4.0463  | 53.714204 | 6  |
| C215 | Cannabiglendol                      | 1.6004  | 54.516204 | 6  |
| C216 | cannabimovone                       | 0.8871  | 57.078204 | 6  |
| C217 | cannabinerol                        | 3.5977  | 59.901376 | 6  |
| C219 | Cannabinodiol (CBND)                | 3.5192  | 55.900618 | 12 |
| C220 | Cannabinodivarin (CBVD)             | 4.0952  | 49.713446 | 12 |
| C221 | Cannabinol methylether (CBNM)       | 3.4865  | 58.994204 | 12 |
| C222 | Cannabinol (CBN)                    | 3.2355  | 55.900618 | 12 |
| C223 | Cannabinol-C2 (CBN-C2)              | 4.2927  | 46.61986  | 12 |
| C224 | Cannabinol-C4 (CBN-C4)              | 3.5235  | 52.807032 | 12 |
| C226 | Cannabiorcol (CBN-C1)               | 4.5004  | 43.526274 | 12 |
| C227 | cannabiorcicchromene                | 4.7189  | 46.193446 | 6  |
| C229 | cannabiorcictrian                   | 3.1597  | 46.193446 | 6  |
| C230 | cannabiorcicyclol                   | 3.539   | 46.193446 | 6  |
| C231 | cannabiorcicyclolic acid            | 3.0253  | 49.557446 | 6  |
| C232 | cannabioxepane                      | 3.2899  | 53.233446 | 13 |
| C233 | Cannabiripsol (CBR)                 | 0.4579  | 61.505376 | 6  |
| C239 | cannabispirone                      | 1.175   | 40.808274 | 6  |
| C240 | Cannabitol (CBT)                    | 0.8091  | 60.17179  | 6  |
| C241 | Cannabitolvarin (CBTV)              | 1.5251  | 53.182618 | 6  |
| C242 | Cannabivarin (CBV)                  | 3.8115  | 49.713446 | 12 |
| C243 | cannflavin A                        | 6.4375  | 69.242204 | 16 |
| C244 | cannflavin B                        | 5.2053  | 55.10786  | 16 |
| C245 | cannflavin C                        | 6.4375  | 69.242204 | 16 |
| C246 | carbofuran                          | 2.5928  | 34.627895 | 6  |
| C247 | carmagerol                          | 0.9936  | 62.838962 | 6  |
| C248 | Carvacrol                           | 2.5933  | 27.737102 | 6  |
| C250 | Carvone                             | 1.5954  | 27.737102 | 0  |
| C251 | Cedryl acetate                      | 1.7364  | 50.194204 | 0  |
| C253 | Chiricanine B                       | 3.9259  | 52.275446 | 12 |
| C256 | cis-2-pinanol                       | 0.8417  | 30.404274 | 0  |
| C257 | cis-beta-farnesene                  | 4.3258  | 42.403032 | 0  |
| C258 | cis-gamma-bisabolene                | 3.953   | 42.403032 | 0  |
| C259 | cis-ocimene                         | 3.2403  | 28.268688 | 0  |
| C260 | cis-sabinene hydrate                | 0.9414  | 29.602274 | 0  |
| C261 | Citronellyl acetate                 | 1.8432  | 37.393446 | 0  |
| C262 | Citronelloformate                   | 1.7644  | 34.29986  | 0  |
| C263 | compound-2                          | -0.1732 | 60.97379  | 6  |
| C264 | Compound-3                          | 0.6173  | 59.640204 | 6  |

|      |                                                        |         |           |    |
|------|--------------------------------------------------------|---------|-----------|----|
| C265 | compound-4                                             | 2.0924  | 58.036204 | 6  |
| C266 | Confluentin                                            | 5.9511  | 60.32779  | 6  |
| C267 | Cumene                                                 | 2.2471  | 23.841516 | 6  |
| C268 | Cuminaldehyde                                          | 2.0065  | 26.403516 | 6  |
| C270 | Delta-9-tetrahydrocannabiorcolic acid (THCA-C1)        | 3.0321  | 49.557446 | 6  |
| C271 | Decanal                                                | -2.1223 | 31.73786  | 0  |
| C272 | Decarboxyamorfrutin A                                  | 5.1658  | 52.807032 | 12 |
| C273 | Decarboxyamorfrutin B                                  | 6.398   | 66.941376 | 12 |
| C274 | Dehydrocannabifuran (DCBF)                             | 3.7716  | 54.567032 | 13 |
| C275 | Delta-3-Carene                                         | 2.1434  | 28.268688 | 0  |
| C276 | Delta-7-cis-Isotetrahydrocannabivarin                  | 3.0263  | 52.380618 | 6  |
| C277 | Delta-7-trans-Isotetrahydrocannabinol                  | 2.4503  | 58.56779  | 6  |
| C278 | Delta-8-tetrahydrocannabinol ( $\Delta$ 8-THC)         | 2.0609  | 58.56779  | 6  |
| C279 | Delta-8-tetrahydrocannabinolic acid ( $\Delta$ 8-THCA) | 1.6398  | 61.93179  | 6  |
| C280 | Delta-9-cis-tetrahydrocannabivarin                     | 2.6021  | 52.380618 | 6  |
| C281 | Delta-9-nor-tetrahydrocannabinolic acid                | 2.4429  | 60.598204 | 6  |
| C282 | Delta-9-nor-tetrahydrocannabinol                       | 2.7018  | 57.234204 | 6  |
| C283 | Delta-9-Tetrahydrocannabinol-C4                        | 2.1867  | 55.4742   | 6  |
| C284 | Delta-9-tetrahydrocannabiorcol (THC-C1)                | 3.291   | 46.193446 | 6  |
| C285 | Delta-9-tetrahydrocannabinolic acid A (THCA-A)         | 1.5124  | 61.93179  | 6  |
| C286 | Delta-9-tetrahydrocannabinolic acid B (THCA-B)         | 1.5124  | 61.93179  | 6  |
| C287 | Delta-9-tetrahydrocannabinolic acid-C4 (THCA-C4)       | 1.8004  | 58.838204 | 6  |
| C288 | Delta-Cadinene                                         | 2.2115  | 42.403032 | 0  |
| C290 | Demethyldecarboxyamorfrutin A                          | 4.7874  | 49.713446 | 12 |
| C293 | Desmodianone C                                         | 5.735   | 70.57579  | 12 |
| C294 | Desmodianone D                                         | 4.4114  | 69.242204 | 12 |
| C295 | Desmodianone E                                         | 4.1634  | 69.242204 | 12 |
| C297 | Dibutyl phthalate                                      | 0.3286  | 46.03745  | 6  |
| C298 | Diethyl Phthalate                                      | 2.0602  | 33.6631   | 6  |
| C299 | Dimethylbenzylcarbinyl acetate                         | 2.5083  | 33.39269  | 6  |
| C303 | Dothiepin Sulfoxide                                    | 2.8277  | 52.24465  | 12 |
| C304 | Durene                                                 | 3.7748  | 26.9351   | 6  |
| C305 | Dyclocaine                                             | 0.2744  | 52.38741  | 6  |
| C306 | epi-Bornyl Delta-9-tetrahydrocannabinolate             | 3.0646  | 90.20048  | 6  |
| C307 | Estragole                                              | 2.8139  | 26.40352  | 6  |
| C312 | Eudesmyl-Cannabigerolate                               | 4.9875  | 105.6684  | 6  |
| C313 | Eugenol                                                | 2.6739  | 27.20552  | 6  |
| C314 | Eugenyl acetate                                        | 2.709   | 32.8611   | 6  |
| C315 | Fenchone                                               | 1.2557  | 29.07069  | 0  |
| C317 | Ferruginene A                                          | 2.9177  | 61.93179  | 6  |
| C318 | Ferruginene B                                          | 3.4229  | 61.93179  | 6  |

|      |                                           |         |          |    |
|------|-------------------------------------------|---------|----------|----|
| C319 | Ferruginene C                             | 3.7495  | 61.12979 | 6  |
| C322 | Furfurylmethylamphetamine                 | 3.0916  | 40.97107 | 11 |
| C323 | gamma-curcumene                           | 3.512   | 42.40303 | 0  |
| C324 | gamma-eudesmol                            | 1.2945  | 44.53862 | 0  |
| C325 | Gamma-Gurjunene                           | 2.6467  | 42.40303 | 0  |
| C327 | gamma-muurolene                           | 2.2603  | 42.40303 | 0  |
| C328 | Gamma-Terpinene                           | 2.4017  | 28.26869 | 0  |
| C329 | Glepidotin C                              | 3.6156  | 50.51545 | 12 |
| C330 | Globulol                                  | 1.2587  | 44.53862 | 0  |
| C332 | guajol                                    | 1.6736  | 19.25834 | 6  |
| C333 | Heli-Cannabigenol                         | 6.0196  | 63.84779 | 12 |
| C334 | Heptanal                                  | -1.2583 | 22.4571  | 0  |
| C336 | Hexahydrocannabinol                       | 1.4701  | 59.90138 | 6  |
| C339 | Hexanoic acid, propyl ester               | -1.0941 | 29.44627 | 0  |
| C341 | Hordenine                                 | 2.0192  | 29.50389 | 6  |
| C342 | Hydroxy Heli-Cannabigerol                 | 5.8796  | 64.64979 | 12 |
| C349 | Isobutyrophenone                          | 2.2943  | 26.40352 | 6  |
| C350 | Isocannabitrol                            | 0.747   | 63.26538 | 6  |
| C252 | Isodurene                                 | 3.7748  | 26.9351  | 6  |
| C353 | Isoeugenol                                | 2.4251  | 27.20552 | 6  |
| C354 | Isolimonene                               | 2.232   | 28.26869 | 0  |
| C356 | Isoquinoline                              | 1.7687  | 21.60755 | 10 |
| C358 | Limonene oxide                            | 0.4229  | 29.87269 | 0  |
| C359 | Limonene                                  | 2.1424  | 28.26869 | 0  |
| C361 | Linalyl acetate                           | 2.8483  | 36.05986 | 0  |
| C362 | linoleic acid                             | -0.9485 | 54.62138 | 0  |
| C363 | Longifolene                               | 1.8468  | 42.40303 | 0  |
| C365 | Machaeridiol A                            | 5.0453  | 62.5142  | 12 |
| C366 | Machaeridiol B                            | 4.9053  | 63.3162  | 12 |
| C367 | Machaeridiol C                            | 5.1725  | 61.98262 | 15 |
| C368 | Machaeridiol D                            | 3.7233  | 62.78462 | 15 |
| C369 | m-cymene                                  | 2.7333  | 26.9351  | 6  |
| C373 | Methyl acetylsalicylate                   | 1.5898  | 27.47593 | 6  |
| C380 | Methyl isoeugenol                         | 2.6761  | 30.2991  | 6  |
| C384 | Methylen-bis-Delta-9-tetrahydrocannabinol | 4.1968  | 118.8956 | 12 |
| C386 | m-Tert-Butyl Phenol                       | 3.0904  | 27.7371  | 6  |
| C389 | Nerolidol                                 | 3.7014  | 44.53862 | 0  |
| C391 | Nonanal                                   | -1.8343 | 28.64427 | 0  |
| C392 | Nonane                                    | -1.9134 | 29.17586 | 0  |
| C393 | nor-cannabidiol                           | 2.8696  | 55.4742  | 6  |
| C394 | nor-cannabinol                            | 3.5235  | 52.80703 | 12 |

|      |                                       |         |          |    |
|------|---------------------------------------|---------|----------|----|
| C395 | nor-cannabivarin                      | 4.2927  | 46.61986 | 12 |
| C396 | N-p-Coumaroyltyramine                 | 3.0619  | 44.76148 | 12 |
| C397 | N-trans-feruloyltyramine              | 3.1729  | 48.65707 | 12 |
| C398 | Octanal                               | -1.5463 | 25.55069 | 0  |
| C399 | o-cymene                              | 2.7333  | 26.9351  | 6  |
| C400 | o-dimethyl hydroquinone               | 1.9246  | 22.35193 | 6  |
| C401 | O-Guaiacol                            | 1.801   | 19.25834 | 6  |
| C402 | oleic acid                            | -2.3427 | 55.95496 | 0  |
| C403 | O-Methyl Cannabigerol                 | 3.8487  | 62.99496 | 6  |
| C404 | O-Methyl Acetophenone                 | 2.0561  | 23.30993 | 6  |
| C405 | O-Pentyl-cannabidiol                  | 1.9292  | 74.03572 | 6  |
| C406 | O-Pentyl-Delta-9-tetrahydrocannabinol | 1.7614  | 75.79572 | 6  |
| C407 | O-Propyl-cannabidiol                  | 2.5052  | 67.84855 | 6  |
| C408 | O-Propyl-Delta-9-tetrahydrocannabinol | 2.3374  | 69.60855 | 6  |
| C410 | o-xylene                              | 2.8024  | 20.74793 | 6  |
| C411 | p-acetanisole                         | 1.6809  | 24.11193 | 6  |
| C412 | p-aminotoluene                        | 1.697   | 19.42114 | 6  |
| C413 | P-Cymene                              | 2.7333  | 26.9351  | 6  |
| C415 | Pentamethylbenzene                    | 4.261   | 30.02869 | 6  |
| C417 | Perillaldehyde                        | 1.308   | 27.7371  | 0  |
| C418 | Perrottetinene                        | 4.448   | 62.5142  | 12 |
| C419 | Perrottetinenic acid                  | 4.1891  | 65.8782  | 12 |
| C420 | P-ethyl Toulene                       | 2.4673  | 23.84152 | 6  |
| C422 | Phenylethyl alcohol                   | 1.4811  | 21.54993 | 6  |
| C424 | Piperonal                             | 1.6123  | 20.48676 | 6  |
| C425 | P-Methyl Acetophenone                 | 2.0561  | 23.30993 | 6  |
| C427 | Propofol                              | 2.5242  | 33.92427 | 6  |
| C434 | rac-6'-Epoxy cannabigerol             | 2.568   | 60.70338 | 6  |
| C435 | rac-6'-Epoxy cannabigerolic acid      | 2.0543  | 64.06738 | 6  |
| C436 | Radulanin A                           | 4.4331  | 48.37986 | 12 |
| C437 | Radulanin H                           | 4.0468  | 51.74386 | 12 |
| C438 | Radulanin I                           | 3.5328  | 48.37986 | 12 |
| C439 | Radulanin J                           | 3.5137  | 47.04627 | 12 |
| C440 | Radulanin K                           | 2.749   | 47.31669 | 12 |
| C441 | Radulanin L                           | 4.0383  | 49.18186 | 12 |
| C443 | roughanic acid                        | 0.4781  | 47.10062 | 0  |
| C444 | Sabinene                              | 1.0301  | 28.26869 | 0  |
| C446 | Sativene                              | 1.7772  | 42.40303 | 0  |
| C447 | sesquicannabigerol                    | 4.8299  | 74.03572 | 6  |
| C448 | stearidonic acid                      | 1.2963  | 51.9542  | 0  |
| C449 | Styrene                               | 2.3817  | 19.41434 | 6  |

|      |                                                                                                |        |           |            |
|------|------------------------------------------------------------------------------------------------|--------|-----------|------------|
| C451 | Terpinolene                                                                                    | 2.7208 | 28.26869  | 0          |
| C452 | tert-butyl-benzene                                                                             | 3.2304 | 26.9351   | 6          |
| C453 | Tetrahydrocannabinol epoxide                                                                   | 1.3518 | 59.36979  | 6          |
| C454 | Tetrahydrozoline                                                                               | 0.7261 | 35.74869  | 6          |
| C455 | Thymol                                                                                         | 2.5933 | 27.7371   | 6          |
| C456 | Toluene                                                                                        | 2.3162 | 17.65434  | 6          |
| C457 | trans-alpha-farnesene                                                                          | 4.4725 | 42.40303  | 0          |
| C458 | trans-Archidin-1                                                                               | 4.0137 | 49.98386  | 12         |
| C459 | trans-Archidin-2                                                                               | 4.6474 | 50.51545  | 12         |
| C460 | trans-gamma-bisabolene                                                                         | 3.953  | 42.40303  | 0          |
| C461 | trans-ocimene                                                                                  | 3.2403 | 28.26869  | 0          |
| C465 | Valencene                                                                                      | 2.676  | 42.40303  | 0          |
| C466 | Verbenone                                                                                      | 1.2447 | 27.7371   | 0          |
|      |                                                                                                |        |           |            |
|      | <b>Metabolites after MDS using ADMET (112) (used for HCA and Scaffold analysis)</b>            |        |           |            |
|      |                                                                                                | AlogP  | apol      | naAromAtom |
| C19  | 1-(2-chlorophenyl)ethenone                                                                     | 2.3617 | 21.729551 | 6          |
| C24  | 2-Formyl-Delta-9-Tetrahydrocannabinol                                                          | 2.3006 | 62.88979  | 6          |
| C38  | 3,4,5,6-tetrahydro-7-hydroxy-a,a-2-trimethyl-9-n-propyl-2,6-methano-2H-1-Benzoxocin-5-methanol | 1.7344 | 54.516204 | 6          |
| C43  | 3-Hydroxy-Delta-4,5-Cannabichromene                                                            | 1.87   | 59.36979  | 6          |
| C45  | 3-Methyl Acetophenone                                                                          | 2.0561 | 23.30993  | 6          |
| C51  | 4,5-Dihydroxy-2,3,6-Trimethoxy-9,10-Dihydrophenanthrene                                        | 3.0872 | 45.932274 | 12         |
| C53  | 4-Acetoxy Cannabichromene                                                                      | 3.2217 | 65.025376 | 6          |
| C54  | 4-Acetoxy-2-geranyl-5-hydroxy-3-n-pentylphenol                                                 | 3.3654 | 66.358962 | 6          |
| C57  | 4-hydroxy-2,3,6,7-tetramethoxy-9,10dihydrophenanthrene                                         | 3.2108 | 49.02586  | 12         |
| C66  | 5-acetoxy-6-geranyl-3n -pentyl-1,4-benzoquinone                                                | 1.7414 | 65.025376 | 0          |
| C75  | 6a-R-Cannabichromanone B                                                                       | 0.5919 | 59.640204 | 6          |
| C79  | 7,8-Dehydro-10-O-ethylcannabitrinol                                                            | 1.6178 | 65.025376 | 6          |
| C80  | 7,8-dihydrocannabinol                                                                          | 2.3465 | 57.234204 | 6          |
| C81  | 7-Hydroxy Cannabichromane                                                                      | 2.4105 | 60.703376 | 6          |
| C82  | 7-hydroxy cannabinol                                                                           | 3.0955 | 56.702618 | 12         |
| C83  | 7-Methoxy Cannabispiranone                                                                     | 1.2986 | 43.90186  | 6          |
| C84  | 7-R-Cannabicoumarononic acid                                                                   | 1.2904 | 61.400204 | 9          |
| C88  | 8a-Hydroxy-Delta-9-tetrahydrocannabinol                                                        | 1.3256 | 59.36979  | 6          |
| C89  | 8-oxo-Delta-9-tetrahydrocannabinol                                                             | 1.3517 | 58.036204 | 6          |
| C90  | 9,10-Anhydrocannabitrinol                                                                      | 1.5756 | 58.036204 | 6          |
| C92  | 9 $\beta$ ,10 $\beta$ -Epoxyhexahydrocannabinol                                                | 1.3518 | 59.36979  | 6          |



|      |                                                       |        |           |    |
|------|-------------------------------------------------------|--------|-----------|----|
| C93  | 10 $\alpha$ -Hydroxy-Delta- 9,11 -hexahydrocannabinol | 1.0823 | 59.36979  | 6  |
| C94  | 10-Ethoxy-9-hydroxy-delta-6a-tetrahydrocannabinol     | 1.468  | 66.358962 | 6  |
| C95  | 10-Hydroxy-9-oxo-Delta-8-tetrahydrocannabinol         | 1.3564 | 59.36979  | 6  |
| C96  | 10-O-Ethyl bis-nor cannabitriol                       | 1.5272 | 63.265376 | 6  |
| C97  | 10-Oxo-delta-6a-tetrahydrocannabinol (OTHC)           | 1.5291 | 58.036204 | 6  |
| C105 | acetyl abnormal hydrocannabigerquinol                 | 3.3654 | 66.358962 | 6  |
| C114 | Alpha-Cannabispiranol                                 | 0.2825 | 42.14186  | 6  |
| C139 | Amorfrutin-B                                          | 5.8843 | 70.305376 | 12 |
| C141 | Anethole                                              | 1.2081 | 58.036204 | 6  |
| C160 | Beta-Cannabispiranol                                  | 0.2825 | 42.14186  | 6  |
| C175 | Bis-nor-cannabichromanone                             | 1.9998 | 52.651032 | 6  |
| C177 | Bis-nor-cannabielsoin                                 | 2.4532 | 53.182618 | 6  |
| C178 | Bis-nor-cannabitriol                                  | 1.2123 | 57.078204 | 6  |
| C186 | Cannabichromanone (CBCF)                              | 0.8811 | 57.078204 | 6  |
| C187 | Cannabichromaonone D                                  | 2.0924 | 58.036204 | 6  |
| C189 | Cannabichromenic acid (CBCA)                          | 2.8129 | 61.93179  | 6  |
| C191 | Cannabichromevarinic acid (CBCVA)                     | 3.3889 | 55.744618 | 6  |
| C193 | cannabicoumaronone                                    | 1.5493 | 58.036204 | 9  |
| C195 | Cannabicyclic acid (CBLA)                             | 1.7604 | 61.93179  | 6  |
| C196 | Cannabicyclovarin (CBLV)                              | 2.7227 | 52.380618 | 6  |
| C197 | Cannabidiol (CBD)                                     | 2.5816 | 58.56779  | 6  |
| C199 | Cannabidiol monomethylether (CBDM)                    | 2.8326 | 61.661376 | 6  |
| C200 | Cannabidiocol (CBD-C1)                                | 3.9739 | 46.193446 | 6  |
| C201 | Cannabidivarin (CBDV)                                 | 3.1576 | 52.380618 | 6  |
| C204 | Cannabielsoic acid A (CBEA-A)                         | 1.4909 | 62.73379  | 6  |
| C205 | Cannabielsoin (CBE)                                   | 1.7498 | 59.36979  | 6  |
| C207 | Cannabifuran (CBF)                                    | 3.0632 | 55.900618 | 13 |
| C215 | Cannabiglendol                                        | 1.6004 | 54.516204 | 6  |
| C219 | Cannabinodiol (CBND)                                  | 3.5192 | 55.900618 | 12 |
| C220 | Cannabinodivarin (CBVD)                               | 4.0952 | 49.713446 | 12 |
| C221 | Cannabinol methylether (CBNM)                         | 3.4865 | 58.994204 | 12 |
| C222 | Cannabinol (CBN)                                      | 3.2355 | 55.900618 | 12 |
| C223 | Cannabinol-C2 (CBN-C2)                                | 4.2927 | 46.61986  | 12 |
| C224 | Cannabinol-C4 (CBN-C4)                                | 3.5235 | 52.807032 | 12 |
| C226 | Cannabiorcol (CBN-C1)                                 | 4.5004 | 43.526274 | 12 |
| C227 | cannabiorcicchromene                                  | 4.7189 | 46.193446 | 6  |
| C230 | cannabiorcicyclol                                     | 3.539  | 46.193446 | 6  |
| C231 | cannabiorcicyclic acid                                | 3.0253 | 49.557446 | 6  |
| C232 | cannabioxepane                                        | 3.2899 | 53.233446 | 13 |
| C239 | cannabispirone                                        | 1.175  | 40.808274 | 6  |
| C241 | Cannabitriolvarin (CBTV)                              | 1.5251 | 53.182618 | 6  |

|      |                                                        |         |           |    |
|------|--------------------------------------------------------|---------|-----------|----|
| C242 | Cannabivarin (CBV)                                     | 3.8115  | 49.713446 | 12 |
| C246 | carbofuran                                             | 2.5928  | 34.627895 | 6  |
| C263 | compound-2                                             | -0.1732 | 60.97379  | 6  |
| C264 | Compound-3                                             | 0.6173  | 59.640204 | 6  |
| C265 | compound-4                                             | 2.0924  | 58.036204 | 6  |
| C266 | Confluentin                                            | 5.9511  | 60.32779  | 6  |
| C268 | Cuminaldehyde                                          | 2.0065  | 26.403516 | 6  |
| C270 | Delta-9-tetrahydrocannabinolic acid (THCA-C1)          | 3.0321  | 49.557446 | 6  |
| C273 | Decarboxyamorfrutin B                                  | 6.398   | 66.941376 | 12 |
| C274 | Dehydrocannabifuran (DCBF)                             | 3.7716  | 54.567032 | 13 |
| C276 | Delta-7-cis-Isotetrahydrocannabivarin                  | 3.0263  | 52.380618 | 6  |
| C277 | Delta-7-trans-Isotetrahydrocannabinol                  | 2.4503  | 58.56779  | 6  |
| C278 | Delta-8-tetrahydrocannabinol ( $\Delta$ 8-THC)         | 2.0609  | 58.56779  | 6  |
| C279 | Delta-8-tetrahydrocannabinolic acid ( $\Delta$ 8-THCA) | 1.6398  | 61.93179  | 6  |
| C280 | Delta-9-cis-tetrahydrocannabivarin                     | 2.6021  | 52.380618 | 6  |
| C281 | Delta-9-nor-tetrahydrocannabinolic acid                | 2.4429  | 60.598204 | 6  |
| C282 | Delta-9-nor-tetrahydrocannabinol                       | 2.7018  | 57.234204 | 6  |
| C283 | Delta-9-Tetrahydrocannabinol-C4                        | 2.1867  | 55.4742   | 6  |
| C284 | Delta-9-tetrahydrocannabinol (THC-C1)                  | 3.291   | 46.193446 | 6  |
| C285 | Delta-9-tetrahydrocannabinolic acid A (THCA-A)         | 1.5124  | 61.93179  | 6  |
| C286 | Delta-9-tetrahydrocannabinolic acid B (THCA-B)         | 1.5124  | 61.93179  | 6  |
| C287 | Delta-9-tetrahydrocannabinolic acid-C4 (THCA-C4)       | 1.8004  | 58.838204 | 6  |
| C317 | Ferruginene A                                          | 2.9177  | 61.93179  | 6  |
| C318 | Ferruginene B                                          | 3.4229  | 61.93179  | 6  |
| C319 | Ferruginene C                                          | 3.7495  | 61.12979  | 6  |
| C333 | Heli-Cannabigenol                                      | 6.0196  | 63.84779  | 12 |
| C336 | Hexahydrocannabinol                                    | 1.4701  | 59.90138  | 6  |
| C342 | Hydroxy Heli-Cannabigerol                              | 5.8796  | 64.64979  | 12 |
| C350 | Isocannabitrol                                         | 0.747   | 63.26538  | 6  |
| C365 | Machaeridiol A                                         | 5.0453  | 62.5142   | 12 |
| C366 | Machaeridiol B                                         | 4.9053  | 63.3162   | 12 |
| C367 | Machaeridiol C                                         | 5.1725  | 61.98262  | 15 |
| C368 | Machaeridiol D                                         | 3.7233  | 62.78462  | 15 |
| C393 | nor-cannabidiol                                        | 2.8696  | 55.4742   | 6  |
| C394 | nor-cannabinol                                         | 3.5235  | 52.80703  | 12 |
| C395 | nor-cannabivarin                                       | 4.2927  | 46.61986  | 12 |
| C405 | O-Pentyl-cannabidiol                                   | 1.9292  | 74.03572  | 6  |
| C407 | O-Propyl-cannabidiol                                   | 2.5052  | 67.84855  | 6  |
| C418 | Perrottetinene                                         | 4.448   | 62.5142   | 12 |
| C419 | Perrottetinenic acid                                   | 4.1891  | 65.8782   | 12 |
| C427 | Propofol                                               | 2.5242  | 33.92427  | 6  |

|            |                                                             |        |          |       |
|------------|-------------------------------------------------------------|--------|----------|-------|
| C435       | rac-6'-Epoxy cannabigerolic acid                            | 2.0543 | 64.06738 | 6     |
| C436       | Radulanin A                                                 | 4.4331 | 48.37986 | 12    |
| C437       | Radulanin H                                                 | 4.0468 | 51.74386 | 12    |
| C438       | Radulanin I                                                 | 3.5328 | 48.37986 | 12    |
| C440       | Radulanin K                                                 | 2.749  | 47.31669 | 12    |
| C441       | Radulanin L                                                 | 4.0383 | 49.18186 | 12    |
| C453       | Tetrahydrocannabinol epoxide                                | 1.3518 | 59.36979 | 6     |
| C454       | Tetrahydrozoline                                            | 0.7261 | 35.74869 | 6     |
| C455       | Thymol                                                      | 2.5933 | 27.7371  | 6     |
|            |                                                             |        |          |       |
|            | <b>468 Metabolites and positive &amp; negative controls</b> |        |          |       |
| naAromAtom | nAromBond                                                   | nAtom  | bpol     | C1SP2 |
| 6          | 6                                                           | 68     | 46.94824 | 1     |
| 6          | 6                                                           | 46     | 32.18417 | 2     |
| 12         | 12                                                          | 54     | 34.8038  | 1     |
| 12         | 12                                                          | 56     | 38.473   | 1     |
| 6          | 6                                                           | 45     | 32.18417 | 1     |
| 21         | 22                                                          | 69     | 43.49862 | 1     |
| 12         | 12                                                          | 56     | 37.71421 | 1     |
| 12         | 12                                                          | 59     | 40.58821 | 2     |
| 15         | 16                                                          | 50     | 32.09976 | 1     |
| 6          | 6                                                           | 43     | 30.68535 | 2     |
| 6          | 6                                                           | 43     | 28.76935 | 0     |
| 6          | 6                                                           | 51     | 34.92297 | 1     |
| 6          | 6                                                           | 41     | 26.85335 | 0     |
| 12         | 12                                                          | 61     | 41.81662 | 1     |
| 12         | 12                                                          | 52     | 35.5278  | 1     |
| 10         | 10                                                          | 40     | 29.49735 | 2     |
| 18         | 18                                                          | 60     | 34.2078  | 1     |
| 0          | 0                                                           | 9      | 6.559242 | 0     |
| 10         | 10                                                          | 37     | 27.31093 | 2     |
| 15         | 16                                                          | 57     | 39.0618  | 1     |
| 6          | 6                                                           | 63     | 41.88783 | 0     |
| 12         | 12                                                          | 53     | 35.5278  | 1     |
| 6          | 6                                                           | 50     | 34.78776 | 2     |
| 6          | 6                                                           | 43     | 29.72735 | 0     |
| 6          | 6                                                           | 40     | 25.62493 | 0     |
| 12         | 12                                                          | 50     | 32.45459 | 0     |
| 6          | 6                                                           | 39     | 25.89535 | 0     |
| 12         | 12                                                          | 61     | 41.81662 | 1     |

|    |    |    |           |   |
|----|----|----|-----------|---|
| 6  | 6  | 39 | 27.81135  | 1 |
| 6  | 6  | 40 | 24.66693  | 0 |
| 6  | 6  | 41 | 24.96493  | 0 |
| 6  | 6  | 44 | 29.72735  | 0 |
| 6  | 6  | 41 | 25.62493  | 0 |
| 6  | 6  | 45 | 33.56818  | 3 |
| 12 | 12 | 57 | 38.743417 | 1 |
| 6  | 6  | 43 | 28.488554 | 1 |
| 6  | 6  | 45 | 32.184175 | 1 |
| 6  | 6  | 42 | 29.997761 | 1 |
| 12 | 12 | 54 | 36.557003 | 1 |
| 12 | 12 | 55 | 36.557003 | 0 |
| 6  | 6  | 46 | 33.341382 | 1 |
| 12 | 12 | 51 | 31.496589 | 0 |
| 12 | 12 | 55 | 33.683003 | 0 |
| 12 | 12 | 56 | 36.557003 | 1 |
| 12 | 12 | 57 | 38.31021  | 1 |
| 12 | 12 | 66 | 42.087038 | 1 |
| 6  | 6  | 45 | 32.184175 | 1 |
| 6  | 6  | 42 | 29.997761 | 1 |
| 6  | 6  | 45 | 31.226175 | 0 |
| 6  | 6  | 50 | 36.286589 | 1 |
| 6  | 6  | 55 | 41.275796 | 3 |
| 11 | 11 | 57 | 41.91021  | 2 |
| 6  | 6  | 48 | 33.829761 | 1 |
| 6  | 6  | 44 | 30.685347 | 0 |
| 11 | 11 | 50 | 35.621382 | 2 |
| 6  | 6  | 43 | 29.997761 | 1 |
| 6  | 6  | 45 | 32.184175 | 1 |
| 6  | 6  | 43 | 29.808554 | 1 |
| 12 | 12 | 58 | 38.942624 | 0 |
| 9  | 10 | 49 | 32.908175 | 2 |
| 6  | 6  | 29 | 20.890105 | 0 |
| 16 | 17 | 33 | 19.562898 | 2 |
| 6  | 6  | 32 | 23.672519 | 0 |
| 0  | 0  | 62 | 42.066659 | 1 |
| 0  | 0  | 65 | 44.415866 | 1 |
| 0  | 0  | 64 | 44.253073 | 1 |
| 0  | 0  | 68 | 46.439487 | 1 |
| 0  | 0  | 66 | 45.64428  | 0 |
| 6  | 6  | 73 | 46.439487 | 1 |

|    |    |    |           |   |
|----|----|----|-----------|---|
| 6  | 6  | 73 | 48.625901 | 1 |
| 0  | 0  | 55 | 38.560245 | 1 |
| 0  | 0  | 62 | 42.662659 | 1 |
| 6  | 6  | 26 | 18.6049   | 2 |
| 0  | 0  | 7  | 5.195621  | 1 |
| 0  | 0  | 32 | 23.00731  | 1 |
| 0  | 0  | 21 | 17.9449   | 0 |
| 0  | 0  | 24 | 15.03448  | 0 |
| 0  | 0  | 18 | 10.95966  | 2 |
| 5  | 5  | 20 | 12.11686  | 2 |
| 0  | 0  | 22 | 14.50969  | 1 |
| 0  | 0  | 11 | 7.382035  | 1 |
| 0  | 0  | 22 | 14.50969  | 1 |
| 0  | 0  | 24 | 14.9429   | 1 |
| 0  | 0  | 20 | 14.60328  | 1 |
| 6  | 6  | 23 | 12.32328  | 1 |
| 0  | 0  | 9  | 6.153621  | 1 |
| 14 | 15 | 47 | 29.06014  | 2 |
| 11 | 11 | 35 | 24.82452  | 3 |
| 9  | 10 | 27 | 14.07648  | 2 |
| 6  | 6  | 24 | 12.32328  | 1 |
| 0  | 0  | 19 | 12.32328  | 1 |
| 6  | 6  | 53 | 34.71221  | 0 |
| 0  | 0  | 12 | 8.745656  | 0 |
| 6  | 6  | 24 | 15.304898 | 0 |
| 6  | 6  | 24 | 15.304898 | 0 |
| 6  | 6  | 15 | 8.539242  | 0 |
| 6  | 6  | 12 | 5.212828  | 0 |
| 6  | 6  | 24 | 15.304898 | 0 |
| 0  | 0  | 15 | 10.93207  | 0 |
| 0  | 0  | 25 | 19.407312 | 0 |
| 0  | 0  | 21 | 15.304898 | 0 |
| 0  | 0  | 36 | 26.236968 | 0 |
| 0  | 0  | 29 | 21.86414  | 0 |
| 0  | 0  | 26 | 19.677726 | 0 |
| 6  | 6  | 22 | 13.118484 | 0 |
| 6  | 6  | 37 | 24.050554 | 0 |
| 6  | 6  | 22 | 15.758484 | 2 |
| 6  | 6  | 16 | 11.385656 | 2 |
| 0  | 0  | 13 | 9.703656  | 0 |
| 0  | 0  | 22 | 17.220898 | 0 |

|    |    |    |           |   |
|----|----|----|-----------|---|
| 6  | 6  | 17 | 9.030449  | 0 |
| 6  | 6  | 22 | 13.118484 | 1 |
| 0  | 0  | 16 | 12.84807  | 0 |
| 0  | 0  | 27 | 19.677726 | 0 |
| 6  | 6  | 21 | 13.118484 | 0 |
| 6  | 6  | 56 | 35.67021  | 2 |
| 0  | 0  | 54 | 34.71221  | 0 |
| 0  | 0  | 22 | 16.262898 | 0 |
| 6  | 6  | 18 | 9.703656  | 0 |
| 6  | 6  | 22 | 15.758484 | 2 |
| 0  | 0  | 11 | 8.312449  | 0 |
| 10 | 11 | 21 | 10.93207  | 0 |
| 5  | 5  | 12 | 8.539242  | 3 |
| 0  | 0  | 16 | 11.365277 | 0 |
| 0  | 0  | 20 | 15.304898 | 0 |
| 0  | 0  | 13 | 8.908449  | 0 |
| 6  | 6  | 20 | 12.84807  | 0 |
| 6  | 6  | 29 | 19.932105 | 0 |
| 6  | 6  | 23 | 13.80607  | 1 |
| 6  | 6  | 50 | 32.525796 | 0 |
| 6  | 6  | 22 | 13.118484 | 0 |
| 0  | 0  | 27 | 19.677726 | 1 |
| 6  | 6  | 21 | 13.118484 | 0 |
| 6  | 6  | 24 | 15.304898 | 0 |
| 6  | 6  | 54 | 34.71221  | 1 |
| 6  | 6  | 23 | 14.076484 | 1 |
| 6  | 6  | 20 | 11.89007  | 0 |
| 0  | 0  | 26 | 19.677726 | 0 |
| 0  | 0  | 15 | 9.703656  | 0 |
| 0  | 0  | 20 | 15.304898 | 0 |
| 6  | 6  | 32 | 22.118519 | 0 |
| 0  | 0  | 18 | 13.118484 | 0 |
| 12 | 12 | 40 | 25.425726 | 0 |
| 14 | 16 | 35 | 19.136898 | 0 |
| 6  | 6  | 59 | 39.772624 | 1 |
| 6  | 6  | 61 | 40.043038 | 1 |
| 0  | 0  | 26 | 17.491312 | 0 |
| 6  | 6  | 25 | 17.90848  | 1 |
| 12 | 12 | 43 | 29.52814  | 0 |
| 10 | 11 | 21 | 13.535656 | 1 |
| 0  | 0  | 35 | 26.236968 | 0 |

|    |    |    |           |   |
|----|----|----|-----------|---|
| 6  | 6  | 13 | 9.199242  | 1 |
| 6  | 6  | 20 | 12.84807  | 0 |
| 6  | 6  | 23 | 13.551691 | 0 |
| 6  | 6  | 13 | 7.219242  | 2 |
| 6  | 6  | 82 | 55.077522 | 1 |
| 12 | 12 | 78 | 50.704694 | 1 |
| 0  | 0  | 59 | 39.772624 | 1 |
| 6  | 6  | 61 | 40.043038 | 1 |
| 6  | 6  | 18 | 11.158863 | 2 |
| 6  | 6  | 61 | 40.043038 | 1 |
| 12 | 12 | 43 | 24.050554 | 0 |
| 6  | 6  | 22 | 13.118484 | 0 |
| 0  | 0  | 24 | 18.178898 | 1 |
| 6  | 6  | 56 | 35.67021  | 1 |
| 6  | 6  | 56 | 35.67021  | 1 |
| 6  | 6  | 54 | 34.441796 | 1 |
| 6  | 6  | 51 | 33.213382 | 0 |
| 18 | 18 | 56 | 31.026968 | 0 |
| 16 | 17 | 43 | 22.551726 | 0 |
| 6  | 6  | 59 | 38.814624 | 0 |
| 6  | 6  | 51 | 32.525796 | 0 |
| 6  | 6  | 56 | 36.898624 | 0 |
| 12 | 12 | 50 | 30.339382 | 0 |
| 6  | 6  | 39 | 26.65414  | 0 |
| 9  | 10 | 55 | 36.357796 | 2 |
| 6  | 6  | 55 | 34.71221  | 0 |
| 12 | 12 | 53 | 31.297382 | 1 |
| 12 | 12 | 50 | 30.339382 | 0 |
| 6  | 6  | 54 | 34.71221  | 0 |
| 6  | 6  | 52 | 33.483796 | 0 |
| 6  | 6  | 52 | 34.441796 | 0 |
| 6  | 6  | 42 | 29.257726 | 0 |
| 6  | 6  | 54 | 36.62821  | 0 |
| 6  | 6  | 54 | 34.71221  | 1 |
| 6  | 6  | 61 | 41.001038 | 0 |
| 6  | 6  | 54 | 34.71221  | 0 |
| 6  | 6  | 58 | 38.814624 | 1 |
| 6  | 6  | 52 | 33.483796 | 0 |
| 6  | 6  | 62 | 40.730624 | 2 |
| 6  | 6  | 62 | 40.730624 | 2 |
| 6  | 6  | 55 | 34.982624 | 0 |

|    |    |    |           |   |
|----|----|----|-----------|---|
| 0  | 0  | 7  | 5.330828  | 1 |
| 0  | 0  | 9  | 5.764035  | 1 |
| 0  | 0  | 8  | 5.330828  | 1 |
| 0  | 0  | 10 | 7.517242  | 0 |
| 6  | 6  | 61 | 40.043038 | 1 |
| 0  | 0  | 59 | 39.772624 | 1 |
| 0  | 0  | 8  | 5.330828  | 2 |
| 6  | 6  | 17 | 9.703656  | 0 |
| 0  | 0  | 39 | 26.236968 | 1 |
| 0  | 0  | 42 | 28.423382 | 0 |
| 0  | 0  | 39 | 26.236968 | 1 |
| 0  | 0  | 39 | 26.236968 | 0 |
| 6  | 6  | 95 | 63.823178 | 1 |
| 6  | 6  | 38 | 23.78014  | 0 |
| 0  | 0  | 39 | 26.236968 | 0 |
| 0  | 0  | 39 | 26.236968 | 0 |
| 0  | 0  | 39 | 26.236968 | 0 |
| 0  | 0  | 39 | 26.236968 | 0 |
| 0  | 0  | 42 | 28.423382 | 0 |
| 0  | 0  | 39 | 26.236968 | 1 |
| 0  | 0  | 39 | 26.236968 | 0 |
| 0  | 0  | 39 | 26.236968 | 0 |
| 0  | 0  | 36 | 24.050554 | 0 |
| 0  | 0  | 50 | 33.75421  | 1 |
| 0  | 0  | 39 | 26.236968 | 0 |
| 6  | 6  | 21 | 11.89007  | 1 |
| 0  | 0  | 26 | 17.491312 | 0 |
| 0  | 0  | 26 | 17.491312 | 0 |
| 0  | 0  | 39 | 26.236968 | 1 |
| 6  | 6  | 82 | 55.077522 | 1 |
| 0  | 0  | 26 | 17.491312 | 0 |
| 0  | 0  | 29 | 19.677726 | 0 |
| 0  | 0  | 26 | 17.491312 | 0 |
| 0  | 0  | 39 | 26.236968 | 0 |
| 0  | 0  | 39 | 26.236968 | 0 |
| 12 | 12 | 50 | 29.110968 | 2 |
| 12 | 12 | 59 | 33.75421  | 1 |
| 12 | 12 | 49 | 29.110968 | 1 |
| 12 | 12 | 62 | 37.856624 | 1 |
| 6  | 6  | 23 | 15.034484 | 0 |
| 6  | 6  | 52 | 33.483796 | 1 |



|    |    |     |           |   |
|----|----|-----|-----------|---|
| 0  | 0  | 63  | 45.664659 | 1 |
| 6  | 6  | 44  | 26.924554 | 1 |
| 6  | 6  | 44  | 26.924554 | 1 |
| 16 | 17 | 30  | 13.80607  | 0 |
| 12 | 12 | 42  | 21.86414  | 0 |
| 12 | 12 | 41  | 21.86414  | 0 |
| 12 | 12 | 46  | 24.050554 | 0 |
| 12 | 12 | 45  | 24.050554 | 0 |
| 0  | 0  | 39  | 26.236968 | 0 |
| 0  | 0  | 39  | 26.236968 | 1 |
| 6  | 6  | 14  | 7.517242  | 1 |
| 6  | 6  | 13  | 6.126035  | 0 |
| 12 | 12 | 24  | 11.89007  | 0 |
| 12 | 12 | 39  | 24.937347 | 0 |
| 6  | 6  | 21  | 13.80607  | 1 |
| 6  | 6  | 16  | 8.745656  | 0 |
| 6  | 6  | 18  | 11.619656 | 0 |
| 6  | 6  | 16  | 8.312449  | 0 |
| 6  | 6  | 38  | 23.78014  | 0 |
| 0  | 0  | 40  | 28.152968 | 1 |
| 0  | 0  | 39  | 26.236968 | 1 |
| 0  | 0  | 39  | 26.236968 | 1 |
| 0  | 0  | 39  | 26.236968 | 3 |
| 0  | 0  | 42  | 28.423382 | 1 |
| 0  | 0  | 29  | 19.677726 | 0 |
| 6  | 6  | 79  | 52.891108 | 1 |
| 6  | 6  | 22  | 15.098484 | 1 |
| 0  | 0  | 37  | 25.008554 | 0 |
| 0  | 0  | 26  | 17.491312 | 1 |
| 0  | 0  | 26  | 17.491312 | 1 |
| 0  | 0  | 39  | 26.236968 | 2 |
| 0  | 0  | 148 | 105.09463 | 1 |
| 5  | 5  | 17  | 9.838863  | 1 |
| 6  | 6  | 47  | 30.068968 | 1 |
| 6  | 6  | 51  | 31.297382 | 2 |
| 6  | 6  | 48  | 30.339382 | 1 |
| 6  | 6  | 52  | 32.525796 | 1 |
| 0  | 0  | 29  | 19.677726 | 0 |
| 6  | 6  | 95  | 63.823178 | 1 |
| 0  | 0  | 14  | 10.93207  | 0 |
| 0  | 0  | 17  | 13.80607  | 0 |

|    |    |     |           |   |
|----|----|-----|-----------|---|
| 6  | 6  | 100 | 66.280006 | 1 |
| 0  | 0  | 39  | 26.236968 | 0 |
| 0  | 0  | 26  | 17.491312 | 1 |
| 6  | 6  | 52  | 34.441796 | 0 |
| 6  | 6  | 52  | 35.399796 | 0 |
| 6  | 6  | 53  | 34.71221  | 0 |
| 6  | 6  | 56  | 35.67021  | 1 |
| 6  | 6  | 47  | 30.339382 | 0 |
| 6  | 6  | 50  | 31.297382 | 1 |
| 6  | 6  | 53  | 36.62821  | 0 |
| 9  | 10 | 52  | 35.399796 | 1 |
| 6  | 6  | 53  | 34.71221  | 0 |
| 6  | 6  | 56  | 35.67021  | 1 |
| 6  | 6  | 47  | 30.339382 | 0 |
| 6  | 6  | 53  | 32.79621  | 1 |
| 6  | 6  | 56  | 33.75421  | 2 |
| 6  | 6  | 56  | 36.89862  | 1 |
| 6  | 6  | 41  | 24.050554 | 1 |
| 6  | 6  | 47  | 28.423382 | 1 |
| 6  | 6  | 50  | 29.381382 | 2 |
| 6  | 6  | 57  | 35.67021  | 2 |
| 6  | 6  | 57  | 35.67021  | 2 |
| 6  | 6  | 54  | 34.71221  | 1 |
| 16 | 17 | 47  | 26.65414  | 0 |
| 13 | 15 | 49  | 30.339382 | 0 |
| 6  | 6  | 55  | 34.982624 | 0 |
| 6  | 6  | 61  | 40.043038 | 1 |
| 6  | 6  | 58  | 35.940624 | 1 |
| 6  | 6  | 58  | 39.085038 | 0 |
| 0  | 0  | 53  | 34.71221  | 0 |
| 6  | 6  | 49  | 30.609796 | 0 |
| 6  | 6  | 52  | 31.567796 | 1 |
| 6  | 6  | 50  | 32.525796 | 0 |
| 6  | 6  | 52  | 31.567796 | 1 |
| 6  | 6  | 55  | 34.982624 | 0 |
| 6  | 6  | 58  | 35.940624 | 1 |
| 12 | 12 | 49  | 28.423382 | 1 |
| 12 | 12 | 43  | 24.050554 | 1 |
| 12 | 12 | 52  | 34.441796 | 0 |
| 12 | 12 | 49  | 30.339382 | 0 |
| 12 | 12 | 40  | 23.78014  | 0 |

|    |    |     |           |   |
|----|----|-----|-----------|---|
| 12 | 12 | 46  | 28.152968 | 0 |
| 12 | 12 | 52  | 31.297382 | 1 |
| 12 | 12 | 37  | 21.593726 | 0 |
| 6  | 6  | 41  | 25.966554 | 0 |
| 6  | 6  | 44  | 26.924554 | 1 |
| 6  | 6  | 41  | 27.882554 | 0 |
| 6  | 6  | 41  | 25.966554 | 0 |
| 6  | 6  | 44  | 26.924554 | 1 |
| 13 | 15 | 45  | 27.882554 | 1 |
| 6  | 6  | 57  | 36.898624 | 0 |
| 0  | 0  | 66  | 46.893073 | 1 |
| 28 | 29 | 74  | 36.03221  | 2 |
| 24 | 24 | 76  | 38.218624 | 2 |
| 24 | 24 | 79  | 42.321038 | 2 |
| 24 | 24 | 82  | 46.423452 | 2 |
| 6  | 6  | 36  | 22.551726 | 0 |
| 6  | 6  | 55  | 34.71221  | 0 |
| 6  | 6  | 48  | 30.339382 | 0 |
| 12 | 12 | 43  | 25.966554 | 0 |
| 16 | 17 | 60  | 35.399796 | 0 |
| 16 | 17 | 47  | 26.65414  | 0 |
| 16 | 17 | 60  | 35.399796 | 0 |
| 6  | 6  | 31  | 21.848105 | 0 |
| 6  | 6  | 59  | 37.169038 | 0 |
| 6  | 6  | 25  | 15.304898 | 0 |
| 0  | 0  | 25  | 16.262898 | 1 |
| 12 | 12 | 108 | 68.196006 | 2 |
| 0  | 0  | 47  | 33.483796 | 1 |
| 0  | 0  | 51  | 37.169038 | 0 |
| 12 | 12 | 45  | 27.882554 | 0 |
| 6  | 6  | 44  | 26.251347 | 1 |
| 16 | 17 | 34  | 17.908484 | 0 |
| 0  | 0  | 29  | 19.677726 | 0 |
| 0  | 0  | 39  | 26.236968 | 2 |
| 0  | 0  | 39  | 26.236968 | 0 |
| 0  | 0  | 26  | 17.491312 | 1 |
| 0  | 0  | 28  | 19.677726 | 0 |
| 0  | 0  | 36  | 26.924554 | 1 |
| 0  | 0  | 33  | 24.73814  | 0 |
| 6  | 6  | 56  | 36.62821  | 0 |
| 6  | 6  | 54  | 35.399796 | 0 |

|    |    |    |           |   |
|----|----|----|-----------|---|
| 6  | 6  | 52 | 35.399796 | 0 |
| 6  | 6  | 54 | 34.71221  | 0 |
| 6  | 6  | 21 | 13.118484 | 0 |
| 6  | 6  | 23 | 14.076484 | 1 |
| 6  | 6  | 57 | 35.67021  | 1 |
| 6  | 6  | 44 | 26.924554 | 1 |
| 0  | 0  | 31 | 22.82214  | 1 |
| 12 | 12 | 46 | 28.152968 | 0 |
| 12 | 12 | 59 | 36.898624 | 0 |
| 13 | 15 | 47 | 28.152968 | 1 |
| 0  | 0  | 26 | 17.491312 | 0 |
| 6  | 6  | 47 | 30.339382 | 1 |
| 6  | 6  | 53 | 34.71221  | 1 |
| 6  | 6  | 53 | 34.71221  | 0 |
| 6  | 6  | 56 | 35.67021  | 1 |
| 6  | 6  | 47 | 30.339382 | 0 |
| 6  | 6  | 54 | 33.483796 | 2 |
| 6  | 6  | 51 | 32.525796 | 1 |
| 6  | 6  | 50 | 32.5258   | 0 |
| 6  | 6  | 41 | 25.966554 | 0 |
| 6  | 6  | 56 | 35.67021  | 1 |
| 6  | 6  | 56 | 35.67021  | 1 |
| 6  | 6  | 53 | 33.483796 | 1 |
| 0  | 0  | 39 | 26.236968 | 0 |
| 12 | 12 | 46 | 25.008554 | 1 |
| 12 | 12 | 43 | 24.050554 | 0 |
| 6  | 6  | 48 | 31.297382 | 1 |
| 12 | 12 | 60 | 35.399796 | 0 |
| 12 | 12 | 62 | 35.67021  | 0 |
| 12 | 12 | 60 | 35.399796 | 0 |
| 12 | 12 | 60 | 35.399796 | 0 |
| 0  | 0  | 20 | 14.07648  | 0 |
| 6  | 6  | 42 | 29.79855  | 2 |
| 6  | 6  | 30 | 21.0529   | 2 |
| 6  | 6  | 30 | 20.36531  | 1 |
| 0  | 0  | 11 | 13.03524  | 0 |
| 0  | 0  | 9  | 8.839242  | 0 |
| 0  | 0  | 38 | 28.42338  | 0 |
| 12 | 12 | 43 | 29.31535  | 0 |
| 6  | 6  | 24 | 15.3049   | 0 |
| 6  | 6  | 48 | 34.37059  | 0 |

|    |    |    |          |   |
|----|----|----|----------|---|
| 6  | 6  | 82 | 55.07752 | 1 |
| 6  | 6  | 23 | 15.03448 | 1 |
| 0  | 0  | 14 | 11.61966 | 1 |
| 0  | 0  | 12 | 7.425656 | 0 |
| 0  | 0  | 7  | 6.288828 | 0 |
| 0  | 0  | 8  | 6.126035 | 0 |
| 6  | 6  | 97 | 64.09359 | 1 |
| 6  | 6  | 24 | 15.03448 | 1 |
| 6  | 6  | 29 | 20.0949  | 2 |
| 0  | 0  | 27 | 18.44931 | 0 |
| 0  | 0  | 29 | 19.67773 | 0 |
| 6  | 6  | 56 | 34.71221 | 2 |
| 6  | 6  | 56 | 34.71221 | 1 |
| 6  | 6  | 55 | 32.79621 | 2 |
| 0  | 0  | 5  | 3.144414 | 0 |
| 5  | 5  | 11 | 7.246828 | 2 |
| 11 | 11 | 36 | 24.66693 | 1 |
| 0  | 0  | 39 | 26.23697 | 0 |
| 0  | 0  | 42 | 28.42338 | 0 |
| 0  | 0  | 39 | 26.23697 | 1 |
| 0  | 0  | 18 | 13.80607 | 1 |
| 0  | 0  | 39 | 26.23697 | 1 |
| 0  | 0  | 26 | 17.49131 | 0 |
| 12 | 12 | 44 | 24.05055 | 1 |
| 0  | 0  | 42 | 28.42338 | 0 |
| 24 | 24 | 82 | 48.33945 | 2 |
| 6  | 6  | 17 | 10.66166 | 0 |
| 12 | 12 | 56 | 32.79621 | 0 |
| 0  | 0  | 22 | 16.2629  | 1 |
| 0  | 0  | 50 | 37.16904 | 0 |
| 6  | 6  | 55 | 36.89862 | 0 |
| 0  | 0  | 19 | 14.07648 | 1 |
| 0  | 0  | 23 | 18.1789  | 1 |
| 0  | 0  | 29 | 22.55173 | 1 |
| 12 | 12 | 42 | 24.05055 | 0 |
| 6  | 6  | 27 | 18.3781  | 0 |
| 12 | 12 | 57 | 32.79621 | 0 |
| 0  | 0  | 27 | 17.49131 | 2 |
| 0  | 0  | 18 | 13.11848 | 0 |
| 0  | 0  | 34 | 24.73814 | 1 |
| 0  | 0  | 36 | 26.58493 | 1 |

|    |    |     |          |   |
|----|----|-----|----------|---|
| 0  | 0  | 14  | 10.93207 | 0 |
| 0  | 0  | 13  | 9.703656 | 1 |
| 6  | 6  | 23  | 14.07648 | 0 |
| 6  | 6  | 58  | 36.89862 | 1 |
| 0  | 0  | 7   | 5.557621 | 0 |
| 6  | 6  | 24  | 15.3049  | 0 |
| 6  | 6  | 24  | 15.03448 | 0 |
| 0  | 0  | 26  | 17.49131 | 1 |
| 0  | 0  | 13  | 8.745656 | 2 |
| 10 | 11 | 17  | 8.972449 | 2 |
| 16 | 17 | 31  | 13.80607 | 0 |
| 0  | 0  | 28  | 21.32331 | 0 |
| 0  | 0  | 26  | 17.49131 | 1 |
| 0  | 0  | 29  | 19.67773 | 1 |
| 0  | 0  | 34  | 24.73814 | 2 |
| 0  | 0  | 52  | 35.94062 | 1 |
| 0  | 0  | 39  | 26.23697 | 1 |
| 16 | 17 | 31  | 13.80607 | 0 |
| 12 | 12 | 54  | 30.6098  | 1 |
| 12 | 12 | 55  | 30.6098  | 1 |
| 15 | 16 | 53  | 30.33938 | 1 |
| 15 | 16 | 54  | 32.25538 | 0 |
| 6  | 6  | 24  | 15.3049  | 0 |
| 0  | 0  | 11  | 7.517242 | 2 |
| 0  | 0  | 21  | 14.76407 | 4 |
| 0  | 0  | 11  | 9.433242 | 1 |
| 6  | 6  | 24  | 16.68007 | 2 |
| 6  | 6  | 20  | 12.05286 | 1 |
| 6  | 6  | 18  | 11.61966 | 1 |
| 0  | 0  | 10  | 7.680035 | 0 |
| 0  | 0  | 21  | 14.07648 | 0 |
| 0  | 0  | 26  | 20.36531 | 1 |
| 0  | 0  | 9   | 5.239242 | 0 |
| 6  | 6  | 27  | 19.1369  | 0 |
| 6  | 6  | 19  | 11.61966 | 1 |
| 0  | 0  | 20  | 15.99248 | 1 |
| 0  | 0  | 5   | 3.026414 | 0 |
| 12 | 12 | 107 | 69.42442 | 0 |
| 0  | 0  | 23  | 16.2629  | 0 |
| 6  | 6  | 25  | 15.3049  | 0 |
| 0  | 0  | 26  | 17.49131 | 2 |

|    |    |    |          |   |
|----|----|----|----------|---|
| 0  | 0  | 29 | 19.67773 | 0 |
| 0  | 0  | 42 | 28.42338 | 1 |
| 6  | 6  | 14 | 6.722035 | 0 |
| 0  | 0  | 28 | 20.63573 | 1 |
| 0  | 0  | 29 | 21.86414 | 0 |
| 6  | 6  | 50 | 30.6098  | 1 |
| 12 | 12 | 46 | 28.15297 | 0 |
| 12 | 12 | 40 | 23.78014 | 0 |
| 12 | 12 | 38 | 20.20252 | 1 |
| 12 | 12 | 42 | 24.30493 | 1 |
| 0  | 0  | 25 | 18.44931 | 1 |
| 6  | 6  | 24 | 15.3049  | 0 |
| 6  | 6  | 20 | 14.76407 | 0 |
| 6  | 6  | 17 | 10.66166 | 0 |
| 0  | 0  | 54 | 38.12704 | 1 |
| 6  | 6  | 58 | 39.08504 | 0 |
| 6  | 6  | 20 | 11.89007 | 0 |
| 6  | 6  | 68 | 45.64428 | 1 |
| 6  | 6  | 69 | 47.56028 | 1 |
| 6  | 6  | 62 | 41.27145 | 1 |
| 6  | 6  | 63 | 43.18745 | 1 |
| 16 | 17 | 52 | 26.65414 | 0 |
| 6  | 6  | 18 | 10.93207 | 0 |
| 6  | 6  | 21 | 13.80607 | 0 |
| 6  | 6  | 17 | 9.178863 | 0 |
| 6  | 6  | 24 | 15.3049  | 0 |
| 0  | 0  | 47 | 34.98262 | 0 |
| 6  | 6  | 27 | 17.49131 | 0 |
| 0  | 0  | 16 | 11.89007 | 1 |
| 0  | 0  | 25 | 16.2629  | 2 |
| 12 | 12 | 54 | 32.5258  | 0 |
| 12 | 12 | 57 | 33.4838  | 1 |
| 6  | 6  | 21 | 13.11848 | 0 |
| 6  | 6  | 13 | 6.559242 | 0 |
| 6  | 6  | 19 | 10.93207 | 0 |
| 0  | 0  | 17 | 12.68528 | 0 |
| 6  | 6  | 17 | 11.34924 | 1 |
| 6  | 6  | 20 | 11.89007 | 0 |
| 0  | 0  | 10 | 7.517242 | 1 |
| 6  | 6  | 31 | 19.67773 | 0 |
| 0  | 0  | 19 | 14.76407 | 2 |

|    |    |    |          |   |
|----|----|----|----------|---|
| 0  | 0  | 13 | 9.178863 | 0 |
| 0  | 0  | 13 | 8.745656 | 0 |
| 6  | 6  | 25 | 15.3049  | 0 |
| 6  | 6  | 18 | 10.93207 | 0 |
| 16 | 17 | 32 | 13.80607 | 0 |
| 6  | 6  | 56 | 36.89862 | 0 |
| 6  | 6  | 59 | 37.85662 | 1 |
| 12 | 12 | 41 | 23.78014 | 0 |
| 12 | 12 | 44 | 24.73814 | 1 |
| 12 | 12 | 41 | 23.78014 | 0 |
| 12 | 12 | 39 | 23.50973 | 0 |
| 12 | 12 | 39 | 20.36531 | 1 |
| 12 | 12 | 42 | 23.78014 | 0 |
| 6  | 6  | 57 | 35.67021 | 1 |
| 0  | 0  | 44 | 29.38138 | 1 |
| 0  | 0  | 26 | 17.49131 | 1 |
| 6  | 6  | 15 | 7.517242 | 1 |
| 0  | 0  | 39 | 26.23697 | 1 |
| 6  | 6  | 68 | 43.72828 | 0 |
| 0  | 0  | 48 | 31.5678  | 1 |
| 6  | 6  | 16 | 8.745656 | 1 |
| 0  | 0  | 15 | 10.93207 | 0 |
| 0  | 0  | 26 | 17.49131 | 0 |
| 6  | 6  | 24 | 15.3049  | 0 |
| 6  | 6  | 54 | 36.62821 | 0 |
| 6  | 6  | 31 | 19.47131 | 1 |
| 6  | 6  | 25 | 15.3049  | 0 |
| 6  | 6  | 15 | 8.745656 | 0 |
| 0  | 0  | 39 | 26.23697 | 1 |
| 12 | 12 | 43 | 21.86414 | 0 |
| 12 | 12 | 44 | 24.05055 | 0 |
| 0  | 0  | 39 | 26.23697 | 0 |
| 0  | 0  | 26 | 17.49131 | 1 |
| 0  | 0  | 41 | 30.6098  | 0 |
| 6  | 6  | 21 | 11.36528 | 0 |
| 0  | 0  | 35 | 26.23697 | 0 |
| 0  | 0  | 39 | 26.23697 | 1 |
| 0  | 0  | 25 | 16.2629  | 0 |
| 16 | 17 | 51 | 26.65414 | 0 |
| 12 | 12 | 39 | 20.20252 | 1 |
|    |    |    |          |   |



|            | <b>Metabolites from Machine Learning Methods<br/>(330) (used for MDS using CDK)</b> |       |          |       |  |
|------------|-------------------------------------------------------------------------------------|-------|----------|-------|--|
| naAromAtom | nAromBond                                                                           | nAtom | bpol     | C1SP2 |  |
| 6          | 6                                                                                   | 24    | 15.3049  | 0     |  |
| 6          | 6                                                                                   | 24    | 15.3049  | 0     |  |
| 6          | 6                                                                                   | 12    | 5.212828 | 0     |  |
| 6          | 6                                                                                   | 24    | 15.3049  | 0     |  |
| 0          | 0                                                                                   | 29    | 21.86414 | 0     |  |
| 6          | 6                                                                                   | 22    | 13.11848 | 0     |  |
| 6          | 6                                                                                   | 37    | 24.05055 | 0     |  |
| 6          | 6                                                                                   | 22    | 15.75848 | 2     |  |
| 6          | 6                                                                                   | 17    | 9.030449 | 0     |  |
| 6          | 6                                                                                   | 22    | 13.11848 | 1     |  |
| 6          | 6                                                                                   | 21    | 13.11848 | 0     |  |
| 6          | 6                                                                                   | 56    | 35.67021 | 2     |  |
| 0          | 0                                                                                   | 54    | 34.71221 | 0     |  |
| 6          | 6                                                                                   | 18    | 9.703656 | 0     |  |
| 6          | 6                                                                                   | 22    | 15.75848 | 2     |  |
| 10         | 11                                                                                  | 21    | 10.93207 | 0     |  |
| 6          | 6                                                                                   | 20    | 12.84807 | 0     |  |
| 6          | 6                                                                                   | 29    | 19.93211 | 0     |  |
| 6          | 6                                                                                   | 23    | 13.80607 | 1     |  |
| 6          | 6                                                                                   | 50    | 32.5258  | 0     |  |
| 6          | 6                                                                                   | 22    | 13.11848 | 0     |  |
| 0          | 0                                                                                   | 27    | 19.67773 | 1     |  |
| 6          | 6                                                                                   | 21    | 13.11848 | 0     |  |
| 6          | 6                                                                                   | 24    | 15.3049  | 0     |  |
| 6          | 6                                                                                   | 54    | 34.71221 | 1     |  |
| 6          | 6                                                                                   | 23    | 14.07648 | 1     |  |
| 6          | 6                                                                                   | 20    | 11.89007 | 0     |  |
| 0          | 0                                                                                   | 26    | 19.67773 | 0     |  |
| 6          | 6                                                                                   | 32    | 22.11852 | 0     |  |
| 12         | 12                                                                                  | 40    | 25.42573 | 0     |  |
| 14         | 16                                                                                  | 35    | 19.1369  | 0     |  |
| 6          | 6                                                                                   | 59    | 39.77262 | 1     |  |
| 6          | 6                                                                                   | 61    | 40.04304 | 1     |  |
| 0          | 0                                                                                   | 26    | 17.49131 | 0     |  |
| 6          | 6                                                                                   | 25    | 17.90848 | 1     |  |
| 12         | 12                                                                                  | 43    | 29.52814 | 0     |  |
| 10         | 11                                                                                  | 21    | 13.53566 | 1     |  |

|    |    |    |          |   |
|----|----|----|----------|---|
| 0  | 0  | 35 | 26.23697 | 0 |
| 6  | 6  | 20 | 12.84807 | 0 |
| 6  | 6  | 23 | 13.55169 | 0 |
| 6  | 6  | 82 | 55.07752 | 1 |
| 12 | 12 | 78 | 50.70469 | 1 |
| 0  | 0  | 59 | 39.77262 | 1 |
| 6  | 6  | 61 | 40.04304 | 1 |
| 6  | 6  | 18 | 11.15886 | 2 |
| 12 | 12 | 43 | 24.05055 | 0 |
| 6  | 6  | 22 | 13.11848 | 0 |
| 0  | 0  | 24 | 18.1789  | 1 |
| 6  | 6  | 54 | 34.4418  | 1 |
| 6  | 6  | 51 | 33.21338 | 0 |
| 6  | 6  | 59 | 38.81462 | 0 |
| 6  | 6  | 51 | 32.5258  | 0 |
| 6  | 6  | 56 | 36.89862 | 0 |
| 12 | 12 | 50 | 30.33938 | 0 |
| 6  | 6  | 39 | 26.65414 | 0 |
| 9  | 10 | 55 | 36.3578  | 2 |
| 6  | 6  | 55 | 34.71221 | 0 |
| 12 | 12 | 50 | 30.33938 | 0 |
| 6  | 6  | 54 | 34.71221 | 0 |
| 6  | 6  | 52 | 33.4838  | 0 |
| 6  | 6  | 52 | 34.4418  | 0 |
| 6  | 6  | 42 | 29.25773 | 0 |
| 6  | 6  | 54 | 36.62821 | 0 |
| 6  | 6  | 54 | 34.71221 | 1 |
| 6  | 6  | 61 | 41.00104 | 0 |
| 6  | 6  | 54 | 34.71221 | 0 |
| 6  | 6  | 58 | 38.81462 | 1 |
| 6  | 6  | 52 | 33.4838  | 0 |
| 6  | 6  | 62 | 40.73062 | 2 |
| 6  | 6  | 62 | 40.73062 | 2 |
| 6  | 6  | 55 | 34.98262 | 0 |
| 6  | 6  | 61 | 40.04304 | 1 |
| 0  | 0  | 59 | 39.77262 | 1 |
| 6  | 6  | 17 | 9.703656 | 0 |
| 0  | 0  | 39 | 26.23697 | 1 |
| 0  | 0  | 42 | 28.42338 | 0 |
| 0  | 0  | 39 | 26.23697 | 1 |
| 0  | 0  | 39 | 26.23697 | 0 |

|    |    |    |          |   |
|----|----|----|----------|---|
| 6  | 6  | 95 | 63.82318 | 1 |
| 6  | 6  | 38 | 23.78014 | 0 |
| 0  | 0  | 39 | 26.23697 | 0 |
| 0  | 0  | 39 | 26.23697 | 0 |
| 0  | 0  | 39 | 26.23697 | 0 |
| 0  | 0  | 39 | 26.23697 | 0 |
| 0  | 0  | 42 | 28.42338 | 0 |
| 0  | 0  | 39 | 26.23697 | 1 |
| 0  | 0  | 39 | 26.23697 | 0 |
| 0  | 0  | 39 | 26.23697 | 0 |
| 0  | 0  | 36 | 24.05055 | 0 |
| 0  | 0  | 50 | 33.75421 | 1 |
| 0  | 0  | 39 | 26.23697 | 0 |
| 6  | 6  | 21 | 11.89007 | 1 |
| 0  | 0  | 26 | 17.49131 | 0 |
| 0  | 0  | 26 | 17.49131 | 0 |
| 0  | 0  | 39 | 26.23697 | 1 |
| 6  | 6  | 82 | 55.07752 | 1 |
| 0  | 0  | 26 | 17.49131 | 0 |
| 0  | 0  | 29 | 19.67773 | 0 |
| 0  | 0  | 26 | 17.49131 | 0 |
| 0  | 0  | 39 | 26.23697 | 0 |
| 0  | 0  | 39 | 26.23697 | 0 |
| 12 | 12 | 62 | 37.85662 | 1 |
| 6  | 6  | 23 | 15.03448 | 0 |
| 6  | 6  | 52 | 33.4838  | 1 |
| 0  | 0  | 63 | 45.66466 | 1 |
| 12 | 12 | 42 | 21.86414 | 0 |
| 12 | 12 | 41 | 21.86414 | 0 |
| 12 | 12 | 45 | 24.05055 | 0 |
| 0  | 0  | 39 | 26.23697 | 0 |
| 0  | 0  | 39 | 26.23697 | 1 |
| 6  | 6  | 14 | 7.517242 | 1 |
| 6  | 6  | 13 | 6.126035 | 0 |
| 12 | 12 | 24 | 11.89007 | 0 |
| 12 | 12 | 39 | 24.93735 | 0 |
| 6  | 6  | 16 | 8.745656 | 0 |
| 6  | 6  | 18 | 11.61966 | 0 |
| 6  | 6  | 16 | 8.312449 | 0 |
| 6  | 6  | 38 | 23.78014 | 0 |
| 0  | 0  | 40 | 28.15297 | 1 |

|    |    |    |          |   |
|----|----|----|----------|---|
| 0  | 0  | 39 | 26.23697 | 1 |
| 0  | 0  | 39 | 26.23697 | 1 |
| 0  | 0  | 39 | 26.23697 | 3 |
| 0  | 0  | 42 | 28.42338 | 1 |
| 6  | 6  | 79 | 52.89111 | 1 |
| 0  | 0  | 37 | 25.00855 | 0 |
| 0  | 0  | 26 | 17.49131 | 1 |
| 0  | 0  | 26 | 17.49131 | 1 |
| 0  | 0  | 39 | 26.23697 | 2 |
| 6  | 6  | 47 | 30.06897 | 1 |
| 6  | 6  | 48 | 30.33938 | 1 |
| 6  | 6  | 52 | 32.5258  | 1 |
| 6  | 6  | 95 | 63.82318 | 1 |
| 0  | 0  | 39 | 26.23697 | 0 |
| 0  | 0  | 26 | 17.49131 | 1 |
| 6  | 6  | 52 | 34.4418  | 0 |
| 6  | 6  | 52 | 35.3998  | 0 |
| 6  | 6  | 53 | 34.71221 | 0 |
| 6  | 6  | 56 | 35.67021 | 1 |
| 6  | 6  | 47 | 30.33938 | 0 |
| 6  | 6  | 50 | 31.29738 | 1 |
| 6  | 6  | 53 | 36.62821 | 0 |
| 9  | 10 | 52 | 35.3998  | 1 |
| 6  | 6  | 53 | 34.71221 | 0 |
| 6  | 6  | 56 | 35.67021 | 1 |
| 6  | 6  | 47 | 30.33938 | 0 |
| 6  | 6  | 53 | 32.79621 | 1 |
| 6  | 6  | 56 | 36.89862 | 1 |
| 6  | 6  | 41 | 24.05055 | 1 |
| 6  | 6  | 47 | 28.42338 | 1 |
| 6  | 6  | 57 | 35.67021 | 2 |
| 6  | 6  | 54 | 34.71221 | 1 |
| 16 | 17 | 47 | 26.65414 | 0 |
| 13 | 15 | 49 | 30.33938 | 0 |
| 6  | 6  | 55 | 34.98262 | 0 |
| 6  | 6  | 58 | 39.08504 | 0 |
| 0  | 0  | 53 | 34.71221 | 0 |
| 6  | 6  | 49 | 30.6098  | 0 |
| 6  | 6  | 50 | 32.5258  | 0 |
| 6  | 6  | 52 | 31.5678  | 1 |
| 6  | 6  | 55 | 34.98262 | 0 |

|    |    |    |          |   |
|----|----|----|----------|---|
| 12 | 12 | 49 | 28.42338 | 1 |
| 12 | 12 | 43 | 24.05055 | 1 |
| 12 | 12 | 52 | 34.4418  | 0 |
| 12 | 12 | 49 | 30.33938 | 0 |
| 12 | 12 | 40 | 23.78014 | 0 |
| 12 | 12 | 46 | 28.15297 | 0 |
| 12 | 12 | 37 | 21.59373 | 0 |
| 6  | 6  | 41 | 25.96655 | 0 |
| 6  | 6  | 41 | 27.88255 | 0 |
| 6  | 6  | 41 | 25.96655 | 0 |
| 6  | 6  | 44 | 26.92455 | 1 |
| 13 | 15 | 45 | 27.88255 | 1 |
| 6  | 6  | 57 | 36.89862 | 0 |
| 6  | 6  | 36 | 22.55173 | 0 |
| 6  | 6  | 55 | 34.71221 | 0 |
| 6  | 6  | 48 | 30.33938 | 0 |
| 12 | 12 | 43 | 25.96655 | 0 |
| 16 | 17 | 60 | 35.3998  | 0 |
| 16 | 17 | 47 | 26.65414 | 0 |
| 16 | 17 | 60 | 35.3998  | 0 |
| 6  | 6  | 31 | 21.84811 | 0 |
| 6  | 6  | 59 | 37.16904 | 0 |
| 6  | 6  | 25 | 15.3049  | 0 |
| 0  | 0  | 25 | 16.2629  | 1 |
| 0  | 0  | 47 | 33.4838  | 1 |
| 12 | 12 | 45 | 27.88255 | 0 |
| 0  | 0  | 29 | 19.67773 | 0 |
| 0  | 0  | 39 | 26.23697 | 2 |
| 0  | 0  | 39 | 26.23697 | 0 |
| 0  | 0  | 26 | 17.49131 | 1 |
| 0  | 0  | 28 | 19.67773 | 0 |
| 0  | 0  | 36 | 26.92455 | 1 |
| 0  | 0  | 33 | 24.73814 | 0 |
| 6  | 6  | 56 | 36.62821 | 0 |
| 6  | 6  | 54 | 35.3998  | 0 |
| 6  | 6  | 52 | 35.3998  | 0 |
| 6  | 6  | 54 | 34.71221 | 0 |
| 6  | 6  | 21 | 13.11848 | 0 |
| 6  | 6  | 23 | 14.07648 | 1 |
| 6  | 6  | 44 | 26.92455 | 1 |
| 0  | 0  | 31 | 22.82214 | 1 |

|    |    |    |          |   |
|----|----|----|----------|---|
| 12 | 12 | 46 | 28.15297 | 0 |
| 12 | 12 | 59 | 36.89862 | 0 |
| 13 | 15 | 47 | 28.15297 | 1 |
| 0  | 0  | 26 | 17.49131 | 0 |
| 6  | 6  | 47 | 30.33938 | 1 |
| 6  | 6  | 53 | 34.71221 | 1 |
| 6  | 6  | 53 | 34.71221 | 0 |
| 6  | 6  | 56 | 35.67021 | 1 |
| 6  | 6  | 47 | 30.33938 | 0 |
| 6  | 6  | 54 | 33.4838  | 2 |
| 6  | 6  | 51 | 32.5258  | 1 |
| 6  | 6  | 50 | 32.5258  | 0 |
| 6  | 6  | 41 | 25.96655 | 0 |
| 6  | 6  | 56 | 35.67021 | 1 |
| 6  | 6  | 56 | 35.67021 | 1 |
| 6  | 6  | 53 | 33.4838  | 1 |
| 0  | 0  | 39 | 26.23697 | 0 |
| 12 | 12 | 43 | 24.05055 | 0 |
| 12 | 12 | 62 | 35.67021 | 0 |
| 12 | 12 | 60 | 35.3998  | 0 |
| 12 | 12 | 60 | 35.3998  | 0 |
| 6  | 6  | 42 | 29.79855 | 2 |
| 6  | 6  | 30 | 21.0529  | 2 |
| 6  | 6  | 30 | 20.36531 | 1 |
| 12 | 12 | 43 | 29.31535 | 0 |
| 6  | 6  | 24 | 15.3049  | 0 |
| 6  | 6  | 48 | 34.37059 | 0 |
| 6  | 6  | 82 | 55.07752 | 1 |
| 6  | 6  | 23 | 15.03448 | 1 |
| 6  | 6  | 97 | 64.09359 | 1 |
| 6  | 6  | 24 | 15.03448 | 1 |
| 6  | 6  | 29 | 20.0949  | 2 |
| 0  | 0  | 27 | 18.44931 | 0 |
| 6  | 6  | 56 | 34.71221 | 2 |
| 6  | 6  | 56 | 34.71221 | 1 |
| 6  | 6  | 55 | 32.79621 | 2 |
| 11 | 11 | 36 | 24.66693 | 1 |
| 0  | 0  | 39 | 26.23697 | 0 |
| 0  | 0  | 42 | 28.42338 | 0 |
| 0  | 0  | 39 | 26.23697 | 1 |
| 0  | 0  | 39 | 26.23697 | 1 |

|    |    |     |          |   |
|----|----|-----|----------|---|
| 0  | 0  | 26  | 17.49131 | 0 |
| 12 | 12 | 44  | 24.05055 | 1 |
| 0  | 0  | 42  | 28.42338 | 0 |
| 6  | 6  | 17  | 10.66166 | 0 |
| 12 | 12 | 56  | 32.79621 | 0 |
| 0  | 0  | 22  | 16.2629  | 1 |
| 6  | 6  | 55  | 36.89862 | 0 |
| 0  | 0  | 29  | 22.55173 | 1 |
| 6  | 6  | 27  | 18.3781  | 0 |
| 12 | 12 | 57  | 32.79621 | 0 |
| 6  | 6  | 23  | 14.07648 | 0 |
| 6  | 6  | 58  | 36.89862 | 1 |
| 6  | 6  | 24  | 15.3049  | 0 |
| 6  | 6  | 24  | 15.03448 | 0 |
| 0  | 0  | 26  | 17.49131 | 1 |
| 10 | 11 | 17  | 8.972449 | 2 |
| 0  | 0  | 28  | 21.32331 | 0 |
| 0  | 0  | 26  | 17.49131 | 1 |
| 0  | 0  | 34  | 24.73814 | 2 |
| 0  | 0  | 52  | 35.94062 | 1 |
| 0  | 0  | 39  | 26.23697 | 1 |
| 12 | 12 | 54  | 30.6098  | 1 |
| 12 | 12 | 55  | 30.6098  | 1 |
| 15 | 16 | 53  | 30.33938 | 1 |
| 15 | 16 | 54  | 32.25538 | 0 |
| 6  | 6  | 24  | 15.3049  | 0 |
| 6  | 6  | 24  | 16.68007 | 2 |
| 6  | 6  | 27  | 19.1369  | 0 |
| 12 | 12 | 107 | 69.42442 | 0 |
| 6  | 6  | 25  | 15.3049  | 0 |
| 0  | 0  | 42  | 28.42338 | 1 |
| 0  | 0  | 28  | 20.63573 | 1 |
| 0  | 0  | 29  | 21.86414 | 0 |
| 6  | 6  | 50  | 30.6098  | 1 |
| 12 | 12 | 46  | 28.15297 | 0 |
| 12 | 12 | 40  | 23.78014 | 0 |
| 12 | 12 | 38  | 20.20252 | 1 |
| 12 | 12 | 42  | 24.30493 | 1 |
| 0  | 0  | 25  | 18.44931 | 1 |
| 6  | 6  | 24  | 15.3049  | 0 |
| 6  | 6  | 20  | 14.76407 | 0 |

|    |    |    |          |   |
|----|----|----|----------|---|
| 6  | 6  | 17 | 10.66166 | 0 |
| 0  | 0  | 54 | 38.12704 | 1 |
| 6  | 6  | 58 | 39.08504 | 0 |
| 6  | 6  | 20 | 11.89007 | 0 |
| 6  | 6  | 68 | 45.64428 | 1 |
| 6  | 6  | 69 | 47.56028 | 1 |
| 6  | 6  | 62 | 41.27145 | 1 |
| 6  | 6  | 63 | 43.18745 | 1 |
| 6  | 6  | 18 | 10.93207 | 0 |
| 6  | 6  | 21 | 13.80607 | 0 |
| 6  | 6  | 17 | 9.178863 | 0 |
| 6  | 6  | 24 | 15.3049  | 0 |
| 6  | 6  | 27 | 17.49131 | 0 |
| 0  | 0  | 25 | 16.2629  | 2 |
| 12 | 12 | 54 | 32.5258  | 0 |
| 12 | 12 | 57 | 33.4838  | 1 |
| 6  | 6  | 21 | 13.11848 | 0 |
| 6  | 6  | 19 | 10.93207 | 0 |
| 6  | 6  | 17 | 11.34924 | 1 |
| 6  | 6  | 20 | 11.89007 | 0 |
| 6  | 6  | 31 | 19.67773 | 0 |
| 6  | 6  | 56 | 36.89862 | 0 |
| 6  | 6  | 59 | 37.85662 | 1 |
| 12 | 12 | 41 | 23.78014 | 0 |
| 12 | 12 | 44 | 24.73814 | 1 |
| 12 | 12 | 41 | 23.78014 | 0 |
| 12 | 12 | 39 | 23.50973 | 0 |
| 12 | 12 | 39 | 20.36531 | 1 |
| 12 | 12 | 42 | 23.78014 | 0 |
| 0  | 0  | 44 | 29.38138 | 1 |
| 0  | 0  | 26 | 17.49131 | 1 |
| 0  | 0  | 39 | 26.23697 | 1 |
| 6  | 6  | 68 | 43.72828 | 0 |
| 0  | 0  | 48 | 31.5678  | 1 |
| 6  | 6  | 16 | 8.745656 | 1 |
| 0  | 0  | 26 | 17.49131 | 0 |
| 6  | 6  | 24 | 15.3049  | 0 |
| 6  | 6  | 54 | 36.62821 | 0 |
| 6  | 6  | 31 | 19.47131 | 1 |
| 6  | 6  | 25 | 15.3049  | 0 |
| 6  | 6  | 15 | 8.745656 | 0 |



|            |                                                                                     |       |          |       |
|------------|-------------------------------------------------------------------------------------|-------|----------|-------|
| 0          | 0                                                                                   | 39    | 26.23697 | 1     |
| 12         | 12                                                                                  | 43    | 21.86414 | 0     |
| 12         | 12                                                                                  | 44    | 24.05055 | 0     |
| 0          | 0                                                                                   | 39    | 26.23697 | 0     |
| 0          | 0                                                                                   | 26    | 17.49131 | 1     |
| 0          | 0                                                                                   | 39    | 26.23697 | 1     |
| 0          | 0                                                                                   | 25    | 16.2629  | 0     |
|            | <b>Metabolites after MDS using ADMET (112) (used for HCA and Scaffold analysis)</b> |       |          |       |
| naAromAtom | nAromBond                                                                           | nAtom | bpol     | C1SP2 |
| 6          | 6                                                                                   | 17    | 9.030449 | 0     |
| 6          | 6                                                                                   | 56    | 35.67021 | 2     |
| 6          | 6                                                                                   | 50    | 32.5258  | 0     |
| 6          | 6                                                                                   | 54    | 34.71221 | 1     |
| 6          | 6                                                                                   | 20    | 11.89007 | 0     |
| 12         | 12                                                                                  | 40    | 25.42573 | 0     |
| 6          | 6                                                                                   | 59    | 39.77262 | 1     |
| 6          | 6                                                                                   | 61    | 40.04304 | 1     |
| 12         | 12                                                                                  | 43    | 29.52814 | 0     |
| 0          | 0                                                                                   | 59    | 39.77262 | 1     |
| 6          | 6                                                                                   | 54    | 34.4418  | 1     |
| 6          | 6                                                                                   | 59    | 38.81462 | 0     |
| 6          | 6                                                                                   | 51    | 32.5258  | 0     |
| 6          | 6                                                                                   | 56    | 36.89862 | 0     |
| 12         | 12                                                                                  | 50    | 30.33938 | 0     |
| 6          | 6                                                                                   | 39    | 26.65414 | 0     |
| 9          | 10                                                                                  | 55    | 36.3578  | 2     |
| 6          | 6                                                                                   | 54    | 34.71221 | 0     |
| 6          | 6                                                                                   | 52    | 33.4838  | 0     |
| 6          | 6                                                                                   | 52    | 34.4418  | 0     |
| 6          | 6                                                                                   | 54    | 36.62821 | 0     |
| 6          | 6                                                                                   | 54    | 34.71221 | 1     |
| 6          | 6                                                                                   | 61    | 41.00104 | 0     |
| 6          | 6                                                                                   | 54    | 34.71221 | 0     |
| 6          | 6                                                                                   | 58    | 38.81462 | 1     |
| 6          | 6                                                                                   | 52    | 33.4838  | 0     |
| 6          | 6                                                                                   | 61    | 40.04304 | 1     |
| 6          | 6                                                                                   | 38    | 23.78014 | 0     |
| 12         | 12                                                                                  | 62    | 37.85662 | 1     |
| 6          | 6                                                                                   | 52    | 33.4838  | 1     |
| 6          | 6                                                                                   | 38    | 23.78014 | 0     |

|    |    |    |          |   |
|----|----|----|----------|---|
| 6  | 6  | 47 | 30.06897 | 1 |
| 6  | 6  | 48 | 30.33938 | 1 |
| 6  | 6  | 52 | 32.5258  | 1 |
| 6  | 6  | 52 | 34.4418  | 0 |
| 6  | 6  | 52 | 35.3998  | 0 |
| 6  | 6  | 56 | 35.67021 | 1 |
| 6  | 6  | 50 | 31.29738 | 1 |
| 9  | 10 | 52 | 35.3998  | 1 |
| 6  | 6  | 56 | 35.67021 | 1 |
| 6  | 6  | 47 | 30.33938 | 0 |
| 6  | 6  | 53 | 32.79621 | 1 |
| 6  | 6  | 56 | 36.89862 | 1 |
| 6  | 6  | 41 | 24.05055 | 1 |
| 6  | 6  | 47 | 28.42338 | 1 |
| 6  | 6  | 57 | 35.67021 | 2 |
| 6  | 6  | 54 | 34.71221 | 1 |
| 13 | 15 | 49 | 30.33938 | 0 |
| 6  | 6  | 50 | 32.5258  | 0 |
| 12 | 12 | 49 | 28.42338 | 1 |
| 12 | 12 | 43 | 24.05055 | 1 |
| 12 | 12 | 52 | 34.4418  | 0 |
| 12 | 12 | 49 | 30.33938 | 0 |
| 12 | 12 | 40 | 23.78014 | 0 |
| 12 | 12 | 46 | 28.15297 | 0 |
| 12 | 12 | 37 | 21.59373 | 0 |
| 6  | 6  | 41 | 25.96655 | 0 |
| 6  | 6  | 41 | 25.96655 | 0 |
| 6  | 6  | 44 | 26.92455 | 1 |
| 13 | 15 | 45 | 27.88255 | 1 |
| 6  | 6  | 36 | 22.55173 | 0 |
| 6  | 6  | 48 | 30.33938 | 0 |
| 12 | 12 | 43 | 25.96655 | 0 |
| 6  | 6  | 31 | 21.84811 | 0 |
| 6  | 6  | 56 | 36.62821 | 0 |
| 6  | 6  | 54 | 35.3998  | 0 |
| 6  | 6  | 52 | 35.3998  | 0 |
| 6  | 6  | 54 | 34.71221 | 0 |
| 6  | 6  | 23 | 14.07648 | 1 |
| 6  | 6  | 44 | 26.92455 | 1 |
| 12 | 12 | 59 | 36.89862 | 0 |
| 13 | 15 | 47 | 28.15297 | 1 |

|    |    |    |          |   |
|----|----|----|----------|---|
| 6  | 6  | 47 | 30.33938 | 1 |
| 6  | 6  | 53 | 34.71221 | 1 |
| 6  | 6  | 53 | 34.71221 | 0 |
| 6  | 6  | 56 | 35.67021 | 1 |
| 6  | 6  | 47 | 30.33938 | 0 |
| 6  | 6  | 54 | 33.4838  | 2 |
| 6  | 6  | 51 | 32.5258  | 1 |
| 6  | 6  | 50 | 32.5258  | 0 |
| 6  | 6  | 41 | 25.96655 | 0 |
| 6  | 6  | 56 | 35.67021 | 1 |
| 6  | 6  | 56 | 35.67021 | 1 |
| 6  | 6  | 53 | 33.4838  | 1 |
| 6  | 6  | 56 | 34.71221 | 2 |
| 6  | 6  | 56 | 34.71221 | 1 |
| 6  | 6  | 55 | 32.79621 | 2 |
| 12 | 12 | 56 | 32.79621 | 0 |
| 6  | 6  | 55 | 36.89862 | 0 |
| 12 | 12 | 57 | 32.79621 | 0 |
| 6  | 6  | 58 | 36.89862 | 1 |
| 12 | 12 | 54 | 30.6098  | 1 |
| 12 | 12 | 55 | 30.6098  | 1 |
| 15 | 16 | 53 | 30.33938 | 1 |
| 15 | 16 | 54 | 32.25538 | 0 |
| 6  | 6  | 50 | 30.6098  | 1 |
| 12 | 12 | 46 | 28.15297 | 0 |
| 12 | 12 | 40 | 23.78014 | 0 |
| 6  | 6  | 68 | 45.64428 | 1 |
| 6  | 6  | 62 | 41.27145 | 1 |
| 12 | 12 | 54 | 32.5258  | 0 |
| 12 | 12 | 57 | 33.4838  | 1 |
| 6  | 6  | 31 | 19.67773 | 0 |
| 6  | 6  | 59 | 37.85662 | 1 |
| 12 | 12 | 41 | 23.78014 | 0 |
| 12 | 12 | 44 | 24.73814 | 1 |
| 12 | 12 | 41 | 23.78014 | 0 |
| 12 | 12 | 39 | 20.36531 | 1 |
| 12 | 12 | 42 | 23.78014 | 0 |
| 6  | 6  | 54 | 36.62821 | 0 |
| 6  | 6  | 31 | 19.47131 | 1 |
| 6  | 6  | 25 | 15.3049  | 0 |
|    |    |    |          |   |

| 468 Metabolites and positive & negative controls |       |       |       |       |
|--------------------------------------------------|-------|-------|-------|-------|
| C2SP2                                            | C3SP2 | C1SP3 | C2SP3 | C3SP3 |
| 6                                                | 2     | 4     | 7     | 3     |
| 6                                                | 1     | 3     | 3     | 2     |
| 10                                               | 2     | 5     | 3     | 0     |
| 10                                               | 2     | 7     | 2     | 0     |
| 5                                                | 1     | 4     | 3     | 2     |
| 16                                               | 2     | 4     | 5     | 0     |
| 11                                               | 1     | 4     | 6     | 0     |
| 11                                               | 1     | 4     | 4     | 1     |
| 11                                               | 1     | 6     | 1     | 0     |
| 5                                                | 1     | 0     | 6     | 1     |
| 6                                                | 2     | 1     | 5     | 1     |
| 5                                                | 2     | 2     | 6     | 1     |
| 4                                                | 2     | 1     | 7     | 1     |
| 10                                               | 2     | 8     | 2     | 1     |
| 11                                               | 1     | 4     | 3     | 0     |
| 7                                                | 1     | 5     | 1     | 0     |
| 15                                               | 3     | 3     | 3     | 0     |
| 0                                                | 0     | 2     | 0     | 0     |
| 7                                                | 1     | 3     | 1     | 0     |
| 11                                               | 1     | 8     | 1     | 0     |
| 6                                                | 2     | 3     | 7     | 3     |
| 11                                               | 1     | 4     | 5     | 0     |
| 6                                                | 2     | 3     | 5     | 1     |
| 5                                                | 2     | 1     | 6     | 1     |
| 5                                                | 2     | 1     | 6     | 1     |
| 11                                               | 2     | 3     | 1     | 1     |
| 6                                                | 1     | 3     | 3     | 0     |
| 10                                               | 2     | 8     | 2     | 1     |
| 5                                                | 1     | 4     | 2     | 0     |
| 6                                                | 2     | 1     | 5     | 1     |
| 6                                                | 2     | 1     | 5     | 1     |
| 5                                                | 2     | 1     | 6     | 1     |
| 5                                                | 2     | 1     | 6     | 1     |
| 3                                                | 0     | 5     | 5     | 0     |
| 10                                               | 2     | 3     | 4     | 0     |

|    |   |   |    |   |
|----|---|---|----|---|
| 5  | 1 | 1 | 5  | 1 |
| 5  | 1 | 4 | 3  | 2 |
| 5  | 1 | 4 | 2  | 2 |
| 10 | 2 | 3 | 2  | 2 |
| 11 | 2 | 6 | 3  | 0 |
| 6  | 0 | 5 | 5  | 0 |
| 9  | 3 | 4 | 4  | 1 |
| 9  | 3 | 2 | 8  | 1 |
| 10 | 2 | 5 | 4  | 0 |
| 11 | 1 | 6 | 3  | 0 |
| 10 | 2 | 5 | 6  | 1 |
| 5  | 1 | 4 | 3  | 2 |
| 5  | 1 | 4 | 3  | 0 |
| 4  | 2 | 1 | 7  | 1 |
| 5  | 1 | 8 | 2  | 0 |
| 6  | 0 | 4 | 4  | 1 |
| 9  | 0 | 5 | 4  | 1 |
| 6  | 2 | 2 | 5  | 1 |
| 7  | 3 | 1 | 4  | 0 |
| 9  | 0 | 4 | 5  | 0 |
| 7  | 1 | 2 | 3  | 0 |
| 5  | 1 | 4 | 3  | 2 |
| 5  | 1 | 0 | 6  | 0 |
| 10 | 2 | 4 | 8  | 0 |
| 5  | 4 | 5 | 2  | 1 |
| 5  | 1 | 1 | 2  | 0 |
| 10 | 2 | 2 | 0  | 0 |
| 5  | 1 | 1 | 1  | 0 |
| 8  | 0 | 3 | 10 | 0 |
| 8  | 0 | 3 | 11 | 0 |
| 6  | 0 | 3 | 12 | 0 |
| 8  | 0 | 3 | 12 | 0 |
| 8  | 0 | 4 | 11 | 0 |
| 13 | 1 | 2 | 11 | 0 |
| 7  | 1 | 2 | 15 | 0 |
| 2  | 0 | 1 | 14 | 0 |
| 8  | 0 | 3 | 10 | 0 |
| 2  | 1 | 1 | 3  | 0 |
| 0  | 0 | 1 | 0  | 0 |
| 0  | 0 | 1 | 7  | 0 |
| 0  | 0 | 2 | 0  | 0 |

|   |   |   |   |   |
|---|---|---|---|---|
| 0 | 0 | 2 | 4 | 0 |
| 0 | 0 | 0 | 3 | 0 |
| 1 | 0 | 0 | 2 | 0 |
| 0 | 0 | 2 | 2 | 1 |
| 0 | 0 | 1 | 1 | 0 |
| 0 | 0 | 2 | 2 | 1 |
| 0 | 0 | 1 | 4 | 0 |
| 0 | 0 | 1 | 2 | 0 |
| 5 | 1 | 0 | 2 | 0 |
| 1 | 0 | 1 | 0 | 0 |
| 5 | 2 | 4 | 3 | 0 |
| 2 | 1 | 4 | 1 | 0 |
| 5 | 2 | 0 | 2 | 0 |
| 5 | 1 | 0 | 2 | 0 |
| 0 | 0 | 2 | 1 | 1 |
| 5 | 3 | 4 | 6 | 3 |
| 0 | 0 | 0 | 0 | 0 |
| 2 | 4 | 4 | 0 | 0 |
| 4 | 2 | 2 | 2 | 0 |
| 0 | 0 | 0 | 0 | 0 |
| 6 | 0 | 0 | 0 | 0 |
| 4 | 2 | 2 | 2 | 0 |
| 0 | 0 | 2 | 2 | 0 |
| 0 | 0 | 4 | 3 | 0 |
| 0 | 0 | 2 | 4 | 0 |
| 0 | 0 | 2 | 9 | 0 |
| 0 | 0 | 5 | 2 | 1 |
| 0 | 0 | 5 | 0 | 3 |
| 3 | 3 | 3 | 0 | 0 |
| 4 | 2 | 6 | 0 | 0 |
| 2 | 0 | 2 | 2 | 0 |
| 2 | 0 | 2 | 0 | 0 |
| 1 | 0 | 2 | 1 | 0 |
| 0 | 0 | 4 | 2 | 0 |
| 6 | 1 | 1 | 0 | 0 |
| 4 | 3 | 2 | 0 | 0 |
| 0 | 0 | 4 | 0 | 0 |
| 0 | 0 | 3 | 4 | 1 |
| 4 | 2 | 2 | 1 | 0 |
| 4 | 5 | 4 | 5 | 3 |
| 6 | 4 | 4 | 7 | 0 |

|    |   |   |   |   |
|----|---|---|---|---|
| 1  | 0 | 2 | 4 | 0 |
| 6  | 1 | 1 | 0 | 0 |
| 2  | 0 | 3 | 0 | 1 |
| 0  | 0 | 2 | 1 | 0 |
| 7  | 3 | 1 | 0 | 0 |
| 0  | 0 | 1 | 0 | 0 |
| 0  | 0 | 3 | 0 | 1 |
| 0  | 0 | 3 | 2 | 1 |
| 0  | 0 | 2 | 1 | 0 |
| 6  | 0 | 2 | 0 | 0 |
| 5  | 1 | 2 | 0 | 1 |
| 7  | 1 | 0 | 0 | 0 |
| 4  | 2 | 4 | 5 | 4 |
| 3  | 3 | 3 | 0 | 0 |
| 1  | 0 | 4 | 0 | 3 |
| 4  | 2 | 2 | 1 | 0 |
| 3  | 3 | 3 | 1 | 0 |
| 6  | 3 | 3 | 7 | 1 |
| 4  | 2 | 2 | 0 | 1 |
| 5  | 2 | 2 | 0 | 0 |
| 0  | 0 | 3 | 4 | 1 |
| 2  | 1 | 1 | 2 | 0 |
| 0  | 0 | 3 | 2 | 1 |
| 4  | 2 | 3 | 0 | 1 |
| 0  | 0 | 2 | 3 | 0 |
| 8  | 4 | 0 | 2 | 0 |
| 10 | 4 | 0 | 0 | 0 |
| 7  | 3 | 5 | 6 | 1 |
| 6  | 4 | 5 | 7 | 0 |
| 2  | 0 | 3 | 1 | 3 |
| 5  | 1 | 2 | 0 | 0 |
| 8  | 4 | 0 | 2 | 0 |
| 7  | 1 | 0 | 0 | 0 |
| 0  | 0 | 3 | 7 | 1 |
| 2  | 0 | 1 | 0 | 0 |
| 5  | 1 | 1 | 0 | 0 |
| 4  | 2 | 2 | 1 | 0 |
| 3  | 0 | 0 | 0 | 0 |
| 5  | 5 | 7 | 9 | 5 |
| 7  | 7 | 7 | 7 | 3 |
| 6  | 4 | 5 | 7 | 0 |

|    |   |   |   |   |
|----|---|---|---|---|
| 6  | 4 | 5 | 7 | 0 |
| 4  | 1 | 1 | 0 | 0 |
| 5  | 5 | 4 | 7 | 0 |
| 8  | 4 | 2 | 4 | 0 |
| 3  | 3 | 1 | 3 | 0 |
| 0  | 0 | 1 | 6 | 0 |
| 4  | 4 | 3 | 9 | 0 |
| 4  | 4 | 3 | 9 | 0 |
| 6  | 3 | 4 | 5 | 2 |
| 7  | 2 | 4 | 5 | 2 |
| 12 | 7 | 5 | 0 | 2 |
| 13 | 4 | 2 | 1 | 0 |
| 6  | 4 | 6 | 5 | 2 |
| 5  | 5 | 4 | 6 | 1 |
| 5  | 3 | 4 | 8 | 1 |
| 7  | 5 | 4 | 4 | 1 |
| 5  | 2 | 0 | 6 | 0 |
| 4  | 4 | 4 | 6 | 2 |
| 4  | 4 | 4 | 7 | 2 |
| 6  | 6 | 4 | 4 | 1 |
| 7  | 5 | 4 | 4 | 1 |
| 5  | 3 | 4 | 6 | 3 |
| 6  | 3 | 4 | 5 | 3 |
| 4  | 4 | 4 | 7 | 2 |
| 8  | 4 | 0 | 2 | 0 |
| 4  | 2 | 4 | 7 | 4 |
| 4  | 3 | 3 | 7 | 3 |
| 4  | 4 | 6 | 7 | 2 |
| 5  | 3 | 4 | 6 | 3 |
| 4  | 3 | 6 | 4 | 4 |
| 5  | 4 | 4 | 6 | 2 |
| 4  | 4 | 5 | 6 | 3 |
| 4  | 4 | 5 | 6 | 3 |
| 6  | 4 | 4 | 7 | 0 |
| 0  | 0 | 1 | 0 | 0 |
| 0  | 0 | 1 | 0 | 0 |
| 0  | 0 | 1 | 0 | 0 |
| 1  | 0 | 2 | 0 | 0 |
| 6  | 4 | 5 | 7 | 0 |
| 6  | 4 | 5 | 7 | 0 |
| 1  | 0 | 0 | 0 | 0 |



|    |   |   |    |   |
|----|---|---|----|---|
| 6  | 1 | 1 | 0  | 0 |
| 0  | 1 | 3 | 4  | 5 |
| 2  | 2 | 4 | 5  | 2 |
| 0  | 3 | 3 | 5  | 3 |
| 2  | 2 | 4 | 3  | 4 |
| 5  | 5 | 8 | 10 | 8 |
| 4  | 2 | 0 | 7  | 0 |
| 1  | 1 | 4 | 4  | 3 |
| 2  | 2 | 4 | 4  | 2 |
| 1  | 1 | 4 | 3  | 5 |
| 1  | 1 | 4 | 3  | 5 |
| 1  | 1 | 4 | 5  | 3 |
| 0  | 3 | 3 | 5  | 3 |
| 0  | 2 | 4 | 4  | 4 |
| 4  | 2 | 4 | 4  | 0 |
| 3  | 1 | 4 | 3  | 1 |
| 6  | 0 | 1 | 10 | 0 |
| 1  | 1 | 4 | 4  | 3 |
| 6  | 2 | 1 | 0  | 0 |
| 3  | 1 | 3 | 1  | 2 |
| 1  | 1 | 3 | 2  | 2 |
| 1  | 2 | 3 | 5  | 2 |
| 5  | 5 | 7 | 9  | 5 |
| 2  | 2 | 3 | 2  | 1 |
| 1  | 1 | 3 | 3  | 2 |
| 1  | 1 | 3 | 2  | 2 |
| 2  | 2 | 4 | 4  | 2 |
| 1  | 1 | 4 | 3  | 5 |
| 8  | 5 | 1 | 4  | 0 |
| 10 | 6 | 3 | 5  | 0 |
| 9  | 5 | 2 | 3  | 0 |
| 10 | 6 | 3 | 5  | 0 |
| 7  | 1 | 1 | 0  | 0 |
| 5  | 3 | 3 | 6  | 3 |
| 3  | 0 | 5 | 12 | 0 |
| 6  | 4 | 4 | 2  | 1 |
| 3  | 3 | 4 | 2  | 4 |
| 13 | 2 | 0 | 0  | 0 |
| 13 | 3 | 2 | 0  | 1 |
| 13 | 3 | 2 | 0  | 1 |
| 11 | 3 | 2 | 2  | 1 |

|    |   |   |    |   |
|----|---|---|----|---|
| 11 | 3 | 2 | 2  | 1 |
| 1  | 1 | 4 | 4  | 3 |
| 0  | 1 | 3 | 4  | 5 |
| 5  | 1 | 0 | 0  | 0 |
| 5  | 1 | 0 | 0  | 0 |
| 11 | 2 | 0 | 0  | 0 |
| 10 | 2 | 2 | 2  | 0 |
| 5  | 1 | 2 | 0  | 0 |
| 5  | 1 | 1 | 0  | 0 |
| 5  | 1 | 1 | 0  | 0 |
| 5  | 1 | 0 | 1  | 0 |
| 4  | 2 | 0 | 7  | 0 |
| 0  | 1 | 3 | 6  | 3 |
| 1  | 2 | 3 | 5  | 2 |
| 0  | 1 | 3 | 5  | 3 |
| 1  | 2 | 3 | 3  | 2 |
| 0  | 1 | 3 | 6  | 3 |
| 0  | 0 | 3 | 4  | 1 |
| 4  | 4 | 6 | 10 | 5 |
| 4  | 0 | 1 | 1  | 0 |
| 3  | 2 | 5 | 2  | 1 |
| 2  | 1 | 2 | 2  | 2 |
| 0  | 1 | 2 | 3  | 2 |
| 0  | 2 | 2 | 6  | 2 |
| 1  | 1 | 9 | 30 | 7 |
| 2  | 0 | 1 | 1  | 0 |
| 6  | 3 | 4 | 3  | 2 |
| 3  | 4 | 3 | 5  | 3 |
| 4  | 3 | 3 | 5  | 3 |
| 4  | 3 | 4 | 4  | 4 |
| 0  | 0 | 3 | 4  | 1 |
| 4  | 6 | 8 | 12 | 5 |
| 0  | 0 | 2 | 2  | 0 |
| 0  | 0 | 2 | 2  | 0 |
| 6  | 6 | 8 | 12 | 5 |
| 1  | 1 | 4 | 4  | 3 |
| 0  | 1 | 2 | 3  | 2 |
| 6  | 2 | 4 | 6  | 2 |
| 7  | 2 | 4 | 6  | 2 |
| 7  | 3 | 4 | 6  | 1 |
| 6  | 4 | 4 | 6  | 1 |

|    |   |   |   |   |
|----|---|---|---|---|
| 7  | 3 | 4 | 4 | 1 |
| 6  | 4 | 4 | 4 | 1 |
| 4  | 2 | 4 | 7 | 4 |
| 5  | 3 | 4 | 6 | 2 |
| 4  | 2 | 4 | 6 | 4 |
| 3  | 3 | 4 | 6 | 4 |
| 4  | 2 | 4 | 4 | 4 |
| 5  | 4 | 3 | 6 | 2 |
| 4  | 5 | 3 | 6 | 2 |
| 5  | 4 | 3 | 6 | 2 |
| 5  | 4 | 3 | 2 | 2 |
| 5  | 4 | 3 | 4 | 2 |
| 4  | 5 | 3 | 4 | 2 |
| 3  | 4 | 3 | 7 | 3 |
| 3  | 4 | 3 | 7 | 3 |
| 4  | 3 | 3 | 7 | 3 |
| 13 | 4 | 2 | 1 | 0 |
| 7  | 5 | 4 | 4 | 1 |
| 6  | 4 | 4 | 7 | 0 |
| 5  | 5 | 4 | 7 | 0 |
| 5  | 5 | 4 | 7 | 0 |
| 6  | 4 | 4 | 7 | 0 |
| 6  | 4 | 4 | 7 | 0 |
| 6  | 4 | 4 | 5 | 0 |
| 5  | 5 | 4 | 5 | 0 |
| 4  | 2 | 4 | 5 | 4 |
| 5  | 3 | 3 | 5 | 3 |
| 6  | 4 | 4 | 7 | 0 |
| 5  | 5 | 4 | 7 | 0 |
| 7  | 6 | 3 | 4 | 0 |
| 7  | 6 | 3 | 2 | 0 |
| 7  | 5 | 4 | 4 | 1 |
| 7  | 5 | 4 | 4 | 1 |
| 7  | 5 | 4 | 1 | 1 |
| 7  | 5 | 4 | 3 | 1 |
| 6  | 6 | 4 | 4 | 1 |
| 7  | 5 | 4 | 0 | 1 |
| 7  | 3 | 4 | 2 | 1 |
| 6  | 4 | 4 | 2 | 1 |
| 4  | 2 | 4 | 3 | 4 |
| 4  | 2 | 4 | 2 | 4 |

|    |   |   |    |   |
|----|---|---|----|---|
| 3  | 3 | 4 | 2  | 4 |
| 7  | 6 | 3 | 4  | 0 |
| 4  | 2 | 4 | 7  | 4 |
| 2  | 0 | 5 | 13 | 0 |
| 20 | 8 | 2 | 2  | 0 |
| 20 | 6 | 2 | 2  | 2 |
| 20 | 6 | 2 | 2  | 2 |
| 20 | 6 | 2 | 2  | 2 |
| 5  | 2 | 0 | 6  | 0 |
| 4  | 4 | 4 | 7  | 2 |
| 4  | 4 | 4 | 5  | 2 |
| 7  | 5 | 4 | 2  | 1 |
| 14 | 5 | 3 | 3  | 0 |
| 13 | 4 | 2 | 1  | 0 |
| 14 | 5 | 3 | 3  | 0 |
| 5  | 1 | 2 | 1  | 1 |
| 5  | 3 | 4 | 8  | 1 |
| 4  | 2 | 3 | 0  | 1 |
| 2  | 2 | 2 | 2  | 1 |
| 8  | 9 | 7 | 13 | 4 |
| 0  | 0 | 5 | 5  | 4 |
| 0  | 0 | 2 | 14 | 0 |
| 11 | 3 | 2 | 2  | 1 |
| 6  | 4 | 4 | 2  | 1 |
| 13 | 2 | 0 | 0  | 0 |
| 0  | 0 | 3 | 3  | 3 |
| 3  | 3 | 3 | 4  | 0 |
| 2  | 4 | 4 | 5  | 0 |
| 3  | 2 | 3 | 1  | 0 |
| 0  | 0 | 3 | 3  | 3 |
| 1  | 1 | 5 | 3  | 1 |
| 1  | 1 | 4 | 3  | 1 |
| 6  | 2 | 4 | 7  | 2 |
| 7  | 2 | 4 | 6  | 2 |
| 7  | 2 | 4 | 6  | 2 |
| 8  | 4 | 5 | 4  | 1 |
| 5  | 1 | 2 | 0  | 1 |
| 4  | 2 | 2 | 0  | 1 |
| 7  | 5 | 5 | 4  | 1 |
| 4  | 4 | 4 | 2  | 3 |
| 0  | 0 | 1 | 8  | 0 |

|    |   |   |    |   |
|----|---|---|----|---|
| 10 | 4 | 2 | 3  | 0 |
| 11 | 5 | 3 | 5  | 0 |
| 7  | 6 | 3 | 4  | 0 |
| 1  | 1 | 3 | 2  | 2 |
| 4  | 3 | 3 | 5  | 3 |
| 4  | 3 | 3 | 7  | 3 |
| 5  | 3 | 4 | 6  | 3 |
| 4  | 4 | 4 | 6  | 3 |
| 5  | 3 | 4 | 4  | 3 |
| 4  | 5 | 4 | 4  | 3 |
| 5  | 4 | 4 | 4  | 3 |
| 5  | 3 | 4 | 5  | 3 |
| 5  | 3 | 4 | 2  | 3 |
| 4  | 4 | 4 | 6  | 3 |
| 4  | 4 | 4 | 6  | 3 |
| 4  | 4 | 4 | 5  | 3 |
| 1  | 3 | 4 | 4  | 3 |
| 9  | 5 | 2 | 3  | 0 |
| 10 | 4 | 2 | 3  | 0 |
| 4  | 4 | 3 | 5  | 0 |
| 12 | 5 | 5 | 2  | 2 |
| 11 | 6 | 5 | 3  | 1 |
| 9  | 4 | 5 | 2  | 5 |
| 10 | 5 | 5 | 2  | 4 |
| 1  | 0 | 3 | 1  | 1 |
| 4  | 2 | 4 | 4  | 0 |
| 4  | 2 | 4 | 0  | 0 |
| 5  | 1 | 3 | 1  | 1 |
| 0  | 0 | 0 | 0  | 0 |
| 0  | 0 | 0 | 0  | 0 |
| 0  | 0 | 2 | 10 | 0 |
| 10 | 4 | 2 | 1  | 0 |
| 2  | 4 | 4 | 0  | 0 |
| 6  | 1 | 5 | 6  | 0 |
| 4  | 4 | 7 | 10 | 4 |
| 6  | 1 | 0 | 1  | 0 |
| 0  | 0 | 3 | 0  | 0 |
| 0  | 0 | 2 | 0  | 0 |
| 0  | 0 | 2 | 0  | 0 |
| 0  | 0 | 2 | 0  | 0 |
| 5  | 7 | 8 | 13 | 2 |

|    |   |   |    |   |
|----|---|---|----|---|
| 6  | 1 | 0 | 1  | 0 |
| 6  | 1 | 1 | 1  | 0 |
| 1  | 0 | 3 | 3  | 1 |
| 0  | 0 | 3 | 4  | 1 |
| 4  | 4 | 3 | 6  | 3 |
| 6  | 3 | 4 | 4  | 4 |
| 5  | 5 | 3 | 5  | 2 |
| 0  | 0 | 0 | 0  | 0 |
| 3  | 0 | 0 | 0  | 0 |
| 8  | 1 | 2 | 2  | 0 |
| 3  | 3 | 4 | 4  | 1 |
| 0  | 2 | 4 | 6  | 2 |
| 1  | 2 | 3 | 4  | 4 |
| 0  | 0 | 1 | 4  | 0 |
| 1  | 2 | 3 | 4  | 4 |
| 2  | 2 | 3 | 2  | 1 |
| 9  | 4 | 1 | 4  | 0 |
| 0  | 0 | 4 | 4  | 6 |
| 21 | 5 | 2 | 3  | 1 |
| 6  | 0 | 0 | 0  | 0 |
| 11 | 5 | 3 | 5  | 0 |
| 0  | 0 | 1 | 5  | 0 |
| 0  | 0 | 2 | 14 | 0 |
| 4  | 2 | 4 | 7  | 4 |
| 0  | 0 | 1 | 4  | 0 |
| 0  | 0 | 1 | 4  | 0 |
| 0  | 0 | 3 | 5  | 0 |
| 10 | 2 | 2 | 2  | 2 |
| 5  | 1 | 1 | 1  | 0 |
| 11 | 5 | 3 | 5  | 0 |
| 2  | 2 | 2 | 2  | 0 |
| 0  | 0 | 3 | 1  | 1 |
| 0  | 0 | 4 | 4  | 1 |
| 0  | 0 | 4 | 4  | 1 |
| 0  | 0 | 3 | 0  | 1 |
| 0  | 0 | 2 | 0  | 1 |
| 6  | 1 | 2 | 0  | 1 |
| 4  | 3 | 4 | 6  | 4 |
| 0  | 0 | 0 | 0  | 0 |
| 2  | 4 | 4 | 0  | 0 |
| 7  | 1 | 1 | 0  | 0 |

|    |   |   |    |   |
|----|---|---|----|---|
| 2  | 1 | 2 | 2  | 2 |
| 1  | 1 | 1 | 0  | 0 |
| 5  | 2 | 0 | 0  | 0 |
| 13 | 2 | 0 | 0  | 0 |
| 0  | 0 | 3 | 4  | 3 |
| 1  | 2 | 2 | 3  | 1 |
| 2  | 1 | 3 | 2  | 1 |
| 2  | 1 | 4 | 2  | 1 |
| 4  | 0 | 1 | 12 | 0 |
| 0  | 1 | 3 | 5  | 3 |
| 13 | 2 | 0 | 0  | 0 |
| 11 | 4 | 2 | 3  | 3 |
| 11 | 4 | 2 | 3  | 3 |
| 11 | 4 | 2 | 3  | 3 |
| 11 | 3 | 3 | 3  | 4 |
| 4  | 2 | 3 | 0  | 1 |
| 0  | 1 | 1 | 0  | 0 |
| 0  | 2 | 2 | 0  | 0 |
| 0  | 0 | 1 | 0  | 0 |
| 5  | 1 | 1 | 0  | 0 |
| 5  | 1 | 0 | 0  | 0 |
| 5  | 1 | 0 | 0  | 0 |
| 0  | 0 | 0 | 0  | 0 |
| 4  | 1 | 3 | 0  | 0 |
| 0  | 0 | 1 | 5  | 0 |
| 0  | 0 | 0 | 0  | 0 |
| 7  | 1 | 1 | 0  | 0 |
| 5  | 1 | 0 | 0  | 0 |
| 0  | 0 | 1 | 3  | 0 |
| 0  | 0 | 0 | 0  | 0 |
| 8  | 8 | 8 | 13 | 6 |
| 2  | 1 | 3 | 2  | 0 |
| 5  | 1 | 3 | 0  | 0 |
| 2  | 2 | 2 | 2  | 0 |
| 2  | 2 | 4 | 2  | 0 |
| 3  | 2 | 4 | 4  | 1 |
| 6  | 0 | 0 | 0  | 0 |
| 0  | 0 | 1 | 7  | 0 |
| 0  | 0 | 2 | 7  | 0 |
| 5  | 4 | 3 | 5  | 2 |
| 7  | 5 | 4 | 3  | 1 |

|    |   |   |    |   |
|----|---|---|----|---|
| 7  | 5 | 4 | 1  | 1 |
| 12 | 2 | 1 | 1  | 0 |
| 12 | 2 | 1 | 1  | 0 |
| 0  | 0 | 1 | 6  | 0 |
| 4  | 2 | 3 | 0  | 1 |
| 6  | 0 | 0 | 0  | 0 |
| 6  | 0 | 0 | 0  | 0 |
| 2  | 0 | 1 | 14 | 0 |
| 6  | 4 | 4 | 7  | 0 |
| 5  | 2 | 2 | 0  | 0 |
| 5  | 4 | 5 | 9  | 2 |
| 5  | 4 | 6 | 8  | 3 |
| 5  | 4 | 5 | 7  | 2 |
| 5  | 4 | 6 | 6  | 3 |
| 12 | 3 | 1 | 5  | 0 |
| 4  | 2 | 2 | 0  | 0 |
| 6  | 1 | 1 | 0  | 0 |
| 5  | 1 | 1 | 0  | 0 |
| 4  | 2 | 3 | 0  | 1 |
| 0  | 0 | 2 | 13 | 0 |
| 1  | 5 | 5 | 0  | 0 |
| 0  | 0 | 1 | 3  | 0 |
| 1  | 2 | 1 | 3  | 1 |
| 10 | 4 | 3 | 4  | 3 |
| 9  | 5 | 3 | 4  | 3 |
| 4  | 2 | 2 | 1  | 0 |
| 6  | 0 | 0 | 0  | 0 |
| 5  | 1 | 1 | 1  | 0 |
| 0  | 0 | 2 | 3  | 0 |
| 5  | 1 | 0 | 0  | 0 |
| 5  | 2 | 2 | 0  | 0 |
| 0  | 0 | 1 | 1  | 0 |
| 4  | 2 | 4 | 0  | 2 |
| 0  | 0 | 2 | 2  | 0 |
| 0  | 0 | 2 | 1  | 0 |
| 0  | 0 | 2 | 1  | 0 |
| 5  | 1 | 3 | 0  | 0 |
| 4  | 2 | 2 | 0  | 0 |
| 13 | 2 | 0 | 0  | 0 |
| 5  | 3 | 4 | 8  | 1 |
| 4  | 4 | 4 | 8  | 1 |



|              |                                                                                     |              |              |              |
|--------------|-------------------------------------------------------------------------------------|--------------|--------------|--------------|
| 10           | 4                                                                                   | 2            | 3            | 0            |
| 9            | 5                                                                                   | 2            | 3            | 0            |
| 9            | 3                                                                                   | 2            | 3            | 1            |
| 11           | 3                                                                                   | 1            | 1            | 2            |
| 10           | 4                                                                                   | 1            | 1            | 2            |
| 10           | 4                                                                                   | 2            | 3            | 0            |
| 4            | 4                                                                                   | 5            | 4            | 4            |
| 6            | 0                                                                                   | 1            | 8            | 0            |
| 0            | 1                                                                                   | 2            | 3            | 2            |
| 5            | 1                                                                                   | 0            | 0            | 0            |
| 0            | 1                                                                                   | 3            | 4            | 5            |
| 7            | 5                                                                                   | 5            | 9            | 0            |
| 8            | 0                                                                                   | 1            | 8            | 0            |
| 6            | 1                                                                                   | 0            | 0            | 0            |
| 0            | 0                                                                                   | 3            | 0            | 1            |
| 1            | 3                                                                                   | 3            | 3            | 0            |
| 5            | 1                                                                                   | 3            | 0            | 0            |
| 4            | 2                                                                                   | 4            | 7            | 4            |
| 4            | 2                                                                                   | 2            | 3            | 1            |
| 4            | 2                                                                                   | 3            | 0            | 1            |
| 5            | 1                                                                                   | 1            | 0            | 0            |
| 4            | 3                                                                                   | 4            | 3            | 0            |
| 13           | 3                                                                                   | 2            | 0            | 1            |
| 10           | 4                                                                                   | 2            | 3            | 0            |
| 2            | 4                                                                                   | 4            | 5            | 0            |
| 3            | 2                                                                                   | 3            | 1            | 0            |
| 0            | 0                                                                                   | 2            | 11           | 0            |
| 5            | 1                                                                                   | 1            | 1            | 0            |
| 0            | 0                                                                                   | 2            | 9            | 0            |
| 1            | 2                                                                                   | 3            | 5            | 2            |
| 2            | 1                                                                                   | 3            | 1            | 2            |
| 12           | 3                                                                                   | 1            | 5            | 0            |
| 12           | 2                                                                                   | 1            | 1            | 0            |
|              |                                                                                     |              |              |              |
|              | <b>Metabolites from Machine Learning Methods<br/>(330) (used for MDS using CDK)</b> |              |              |              |
| <b>C2SP2</b> | <b>C3SP2</b>                                                                        | <b>C1SP3</b> | <b>C2SP3</b> | <b>C3SP3</b> |
| 2            | 4                                                                                   | 4            | 0            | 0            |
| 4            | 2                                                                                   | 2            | 2            | 0            |
| 6            | 0                                                                                   | 0            | 0            | 0            |
| 4            | 2                                                                                   | 2            | 2            | 0            |

|    |   |   |   |   |
|----|---|---|---|---|
| 0  | 0 | 5 | 2 | 1 |
| 3  | 3 | 3 | 0 | 0 |
| 4  | 2 | 6 | 0 | 0 |
| 2  | 0 | 2 | 2 | 0 |
| 6  | 1 | 1 | 0 | 0 |
| 4  | 3 | 2 | 0 | 0 |
| 4  | 2 | 2 | 1 | 0 |
| 4  | 5 | 4 | 5 | 3 |
| 6  | 4 | 4 | 7 | 0 |
| 6  | 1 | 1 | 0 | 0 |
| 2  | 0 | 3 | 0 | 1 |
| 7  | 3 | 1 | 0 | 0 |
| 6  | 0 | 2 | 0 | 0 |
| 5  | 1 | 2 | 0 | 1 |
| 7  | 1 | 0 | 0 | 0 |
| 4  | 2 | 4 | 5 | 4 |
| 3  | 3 | 3 | 0 | 0 |
| 1  | 0 | 4 | 0 | 3 |
| 4  | 2 | 2 | 1 | 0 |
| 3  | 3 | 3 | 1 | 0 |
| 6  | 3 | 3 | 7 | 1 |
| 4  | 2 | 2 | 0 | 1 |
| 5  | 2 | 2 | 0 | 0 |
| 0  | 0 | 3 | 4 | 1 |
| 4  | 2 | 3 | 0 | 1 |
| 8  | 4 | 0 | 2 | 0 |
| 10 | 4 | 0 | 0 | 0 |
| 7  | 3 | 5 | 6 | 1 |
| 6  | 4 | 5 | 7 | 0 |
| 2  | 0 | 3 | 1 | 3 |
| 5  | 1 | 2 | 0 | 0 |
| 8  | 4 | 0 | 2 | 0 |
| 7  | 1 | 0 | 0 | 0 |
| 0  | 0 | 3 | 7 | 1 |
| 5  | 1 | 1 | 0 | 0 |
| 4  | 2 | 2 | 1 | 0 |
| 5  | 5 | 7 | 9 | 5 |
| 7  | 7 | 7 | 7 | 3 |
| 6  | 4 | 5 | 7 | 0 |
| 6  | 4 | 5 | 7 | 0 |
| 4  | 1 | 1 | 0 | 0 |

|   |   |   |    |   |
|---|---|---|----|---|
| 8 | 4 | 2 | 4  | 0 |
| 3 | 3 | 1 | 3  | 0 |
| 0 | 0 | 1 | 6  | 0 |
| 6 | 3 | 4 | 5  | 2 |
| 7 | 2 | 4 | 5  | 2 |
| 6 | 4 | 6 | 5  | 2 |
| 5 | 5 | 4 | 6  | 1 |
| 5 | 3 | 4 | 8  | 1 |
| 7 | 5 | 4 | 4  | 1 |
| 5 | 2 | 0 | 6  | 0 |
| 4 | 4 | 4 | 6  | 2 |
| 4 | 4 | 4 | 7  | 2 |
| 7 | 5 | 4 | 4  | 1 |
| 5 | 3 | 4 | 6  | 3 |
| 6 | 3 | 4 | 5  | 3 |
| 4 | 4 | 4 | 7  | 2 |
| 8 | 4 | 0 | 2  | 0 |
| 4 | 2 | 4 | 7  | 4 |
| 4 | 3 | 3 | 7  | 3 |
| 4 | 4 | 6 | 7  | 2 |
| 5 | 3 | 4 | 6  | 3 |
| 4 | 3 | 6 | 4  | 4 |
| 5 | 4 | 4 | 6  | 2 |
| 4 | 4 | 5 | 6  | 3 |
| 4 | 4 | 5 | 6  | 3 |
| 6 | 4 | 4 | 7  | 0 |
| 6 | 4 | 5 | 7  | 0 |
| 6 | 4 | 5 | 7  | 0 |
| 6 | 1 | 1 | 0  | 0 |
| 0 | 1 | 3 | 4  | 5 |
| 2 | 2 | 4 | 5  | 2 |
| 0 | 3 | 3 | 5  | 3 |
| 2 | 2 | 4 | 3  | 4 |
| 5 | 5 | 8 | 10 | 8 |
| 4 | 2 | 0 | 7  | 0 |
| 1 | 1 | 4 | 4  | 3 |
| 2 | 2 | 4 | 4  | 2 |
| 1 | 1 | 4 | 3  | 5 |
| 1 | 1 | 4 | 3  | 5 |
| 1 | 1 | 4 | 5  | 3 |
| 0 | 3 | 3 | 5  | 3 |

|    |   |   |    |   |
|----|---|---|----|---|
| 0  | 2 | 4 | 4  | 4 |
| 4  | 2 | 4 | 4  | 0 |
| 3  | 1 | 4 | 3  | 1 |
| 6  | 0 | 1 | 10 | 0 |
| 1  | 1 | 4 | 4  | 3 |
| 6  | 2 | 1 | 0  | 0 |
| 3  | 1 | 3 | 1  | 2 |
| 1  | 1 | 3 | 2  | 2 |
| 1  | 2 | 3 | 5  | 2 |
| 5  | 5 | 7 | 9  | 5 |
| 2  | 2 | 3 | 2  | 1 |
| 1  | 1 | 3 | 3  | 2 |
| 1  | 1 | 3 | 2  | 2 |
| 2  | 2 | 4 | 4  | 2 |
| 1  | 1 | 4 | 3  | 5 |
| 10 | 6 | 3 | 5  | 0 |
| 7  | 1 | 1 | 0  | 0 |
| 5  | 3 | 3 | 6  | 3 |
| 3  | 0 | 5 | 12 | 0 |
| 13 | 3 | 2 | 0  | 1 |
| 13 | 3 | 2 | 0  | 1 |
| 11 | 3 | 2 | 2  | 1 |
| 1  | 1 | 4 | 4  | 3 |
| 0  | 1 | 3 | 4  | 5 |
| 5  | 1 | 0 | 0  | 0 |
| 5  | 1 | 0 | 0  | 0 |
| 11 | 2 | 0 | 0  | 0 |
| 10 | 2 | 2 | 2  | 0 |
| 5  | 1 | 1 | 0  | 0 |
| 5  | 1 | 1 | 0  | 0 |
| 5  | 1 | 0 | 1  | 0 |
| 4  | 2 | 0 | 7  | 0 |
| 0  | 1 | 3 | 6  | 3 |
| 1  | 2 | 3 | 5  | 2 |
| 0  | 1 | 3 | 5  | 3 |
| 1  | 2 | 3 | 3  | 2 |
| 0  | 1 | 3 | 6  | 3 |
| 4  | 4 | 6 | 10 | 5 |
| 3  | 2 | 5 | 2  | 1 |
| 2  | 1 | 2 | 2  | 2 |
| 0  | 1 | 2 | 3  | 2 |

|    |   |   |    |   |
|----|---|---|----|---|
| 0  | 2 | 2 | 6  | 2 |
| 6  | 3 | 4 | 3  | 2 |
| 4  | 3 | 3 | 5  | 3 |
| 4  | 3 | 4 | 4  | 4 |
| 4  | 6 | 8 | 12 | 5 |
| 1  | 1 | 4 | 4  | 3 |
| 0  | 1 | 2 | 3  | 2 |
| 6  | 2 | 4 | 6  | 2 |
| 7  | 2 | 4 | 6  | 2 |
| 7  | 3 | 4 | 6  | 1 |
| 6  | 4 | 4 | 6  | 1 |
| 7  | 3 | 4 | 4  | 1 |
| 6  | 4 | 4 | 4  | 1 |
| 4  | 2 | 4 | 7  | 4 |
| 5  | 3 | 4 | 6  | 2 |
| 4  | 2 | 4 | 6  | 4 |
| 3  | 3 | 4 | 6  | 4 |
| 4  | 2 | 4 | 4  | 4 |
| 5  | 4 | 3 | 6  | 2 |
| 5  | 4 | 3 | 6  | 2 |
| 5  | 4 | 3 | 2  | 2 |
| 5  | 4 | 3 | 4  | 2 |
| 3  | 4 | 3 | 7  | 3 |
| 4  | 3 | 3 | 7  | 3 |
| 13 | 4 | 2 | 1  | 0 |
| 7  | 5 | 4 | 4  | 1 |
| 6  | 4 | 4 | 7  | 0 |
| 6  | 4 | 4 | 7  | 0 |
| 6  | 4 | 4 | 7  | 0 |
| 6  | 4 | 4 | 5  | 0 |
| 4  | 2 | 4 | 5  | 4 |
| 5  | 3 | 3 | 5  | 3 |
| 6  | 4 | 4 | 7  | 0 |
| 7  | 6 | 3 | 4  | 0 |
| 7  | 6 | 3 | 2  | 0 |
| 7  | 5 | 4 | 4  | 1 |
| 7  | 5 | 4 | 4  | 1 |
| 7  | 5 | 4 | 1  | 1 |
| 7  | 5 | 4 | 3  | 1 |
| 7  | 5 | 4 | 0  | 1 |
| 7  | 3 | 4 | 2  | 1 |

|    |   |   |   |   |
|----|---|---|---|---|
| 4  | 2 | 4 | 3 | 4 |
| 4  | 2 | 4 | 2 | 4 |
| 3  | 3 | 4 | 2 | 4 |
| 7  | 6 | 3 | 4 | 0 |
| 4  | 2 | 4 | 7 | 4 |
| 5  | 2 | 0 | 6 | 0 |
| 4  | 4 | 4 | 7 | 2 |
| 4  | 4 | 4 | 5 | 2 |
| 7  | 5 | 4 | 2 | 1 |
| 14 | 5 | 3 | 3 | 0 |
| 13 | 4 | 2 | 1 | 0 |
| 14 | 5 | 3 | 3 | 0 |
| 5  | 1 | 2 | 1 | 1 |
| 5  | 3 | 4 | 8 | 1 |
| 4  | 2 | 3 | 0 | 1 |
| 2  | 2 | 2 | 2 | 1 |
| 0  | 0 | 5 | 5 | 4 |
| 11 | 3 | 2 | 2 | 1 |
| 0  | 0 | 3 | 3 | 3 |
| 3  | 3 | 3 | 4 | 0 |
| 2  | 4 | 4 | 5 | 0 |
| 3  | 2 | 3 | 1 | 0 |
| 0  | 0 | 3 | 3 | 3 |
| 1  | 1 | 5 | 3 | 1 |
| 1  | 1 | 4 | 3 | 1 |
| 6  | 2 | 4 | 7 | 2 |
| 7  | 2 | 4 | 6 | 2 |
| 7  | 2 | 4 | 6 | 2 |
| 8  | 4 | 5 | 4 | 1 |
| 5  | 1 | 2 | 0 | 1 |
| 4  | 2 | 2 | 0 | 1 |
| 4  | 4 | 4 | 2 | 3 |
| 0  | 0 | 1 | 8 | 0 |
| 10 | 4 | 2 | 3 | 0 |
| 11 | 5 | 3 | 5 | 0 |
| 7  | 6 | 3 | 4 | 0 |
| 1  | 1 | 3 | 2 | 2 |
| 4  | 3 | 3 | 5 | 3 |
| 4  | 3 | 3 | 7 | 3 |
| 5  | 3 | 4 | 6 | 3 |
| 4  | 4 | 4 | 6 | 3 |

|    |   |   |    |   |
|----|---|---|----|---|
| 5  | 3 | 4 | 4  | 3 |
| 4  | 5 | 4 | 4  | 3 |
| 5  | 4 | 4 | 4  | 3 |
| 5  | 3 | 4 | 5  | 3 |
| 5  | 3 | 4 | 2  | 3 |
| 4  | 4 | 4 | 6  | 3 |
| 4  | 4 | 4 | 6  | 3 |
| 4  | 4 | 4 | 5  | 3 |
| 1  | 3 | 4 | 4  | 3 |
| 10 | 4 | 2 | 3  | 0 |
| 11 | 6 | 5 | 3  | 1 |
| 9  | 4 | 5 | 2  | 5 |
| 10 | 5 | 5 | 2  | 4 |
| 4  | 2 | 4 | 4  | 0 |
| 4  | 2 | 4 | 0  | 0 |
| 5  | 1 | 3 | 1  | 1 |
| 10 | 4 | 2 | 1  | 0 |
| 2  | 4 | 4 | 0  | 0 |
| 6  | 1 | 5 | 6  | 0 |
| 4  | 4 | 7 | 10 | 4 |
| 6  | 1 | 0 | 1  | 0 |
| 5  | 7 | 8 | 13 | 2 |
| 6  | 1 | 0 | 1  | 0 |
| 6  | 1 | 1 | 1  | 0 |
| 1  | 0 | 3 | 3  | 1 |
| 4  | 4 | 3 | 6  | 3 |
| 6  | 3 | 4 | 4  | 4 |
| 5  | 5 | 3 | 5  | 2 |
| 8  | 1 | 2 | 2  | 0 |
| 3  | 3 | 4 | 4  | 1 |
| 0  | 2 | 4 | 6  | 2 |
| 1  | 2 | 3 | 4  | 4 |
| 1  | 2 | 3 | 4  | 4 |
| 2  | 2 | 3 | 2  | 1 |
| 9  | 4 | 1 | 4  | 0 |
| 0  | 0 | 4 | 4  | 6 |
| 6  | 0 | 0 | 0  | 0 |
| 11 | 5 | 3 | 5  | 0 |
| 0  | 0 | 1 | 5  | 0 |
| 4  | 2 | 4 | 7  | 4 |
| 0  | 0 | 3 | 5  | 0 |

|    |   |   |    |   |
|----|---|---|----|---|
| 5  | 1 | 1 | 1  | 0 |
| 11 | 5 | 3 | 5  | 0 |
| 6  | 1 | 2 | 0  | 1 |
| 4  | 3 | 4 | 6  | 4 |
| 2  | 4 | 4 | 0  | 0 |
| 7  | 1 | 1 | 0  | 0 |
| 2  | 1 | 2 | 2  | 2 |
| 5  | 2 | 0 | 0  | 0 |
| 0  | 0 | 3 | 4  | 3 |
| 1  | 2 | 2 | 3  | 1 |
| 2  | 1 | 4 | 2  | 1 |
| 4  | 0 | 1 | 12 | 0 |
| 0  | 1 | 3 | 5  | 3 |
| 11 | 4 | 2 | 3  | 3 |
| 11 | 4 | 2 | 3  | 3 |
| 11 | 4 | 2 | 3  | 3 |
| 11 | 3 | 3 | 3  | 4 |
| 4  | 2 | 3 | 0  | 1 |
| 5  | 1 | 1 | 0  | 0 |
| 7  | 1 | 1 | 0  | 0 |
| 8  | 8 | 8 | 13 | 6 |
| 5  | 1 | 3 | 0  | 0 |
| 3  | 2 | 4 | 4  | 1 |
| 0  | 0 | 1 | 7  | 0 |
| 0  | 0 | 2 | 7  | 0 |
| 5  | 4 | 3 | 5  | 2 |
| 7  | 5 | 4 | 3  | 1 |
| 7  | 5 | 4 | 1  | 1 |
| 12 | 2 | 1 | 1  | 0 |
| 12 | 2 | 1 | 1  | 0 |
| 0  | 0 | 1 | 6  | 0 |
| 4  | 2 | 3 | 0  | 1 |
| 6  | 0 | 0 | 0  | 0 |
| 6  | 0 | 0 | 0  | 0 |
| 2  | 0 | 1 | 14 | 0 |
| 6  | 4 | 4 | 7  | 0 |
| 5  | 2 | 2 | 0  | 0 |
| 5  | 4 | 5 | 9  | 2 |
| 5  | 4 | 6 | 8  | 3 |
| 5  | 4 | 5 | 7  | 2 |
| 5  | 4 | 6 | 6  | 3 |



|    |   |   |   |   |
|----|---|---|---|---|
| 4  | 2 | 2 | 0 | 0 |
| 6  | 1 | 1 | 0 | 0 |
| 5  | 1 | 1 | 0 | 0 |
| 4  | 2 | 3 | 0 | 1 |
| 1  | 5 | 5 | 0 | 0 |
| 1  | 2 | 1 | 3 | 1 |
| 10 | 4 | 3 | 4 | 3 |
| 9  | 5 | 3 | 4 | 3 |
| 4  | 2 | 2 | 1 | 0 |
| 5  | 1 | 1 | 1 | 0 |
| 5  | 1 | 0 | 0 | 0 |
| 5  | 2 | 2 | 0 | 0 |
| 4  | 2 | 4 | 0 | 2 |
| 5  | 3 | 4 | 8 | 1 |
| 4  | 4 | 4 | 8 | 1 |
| 10 | 4 | 2 | 3 | 0 |
| 9  | 5 | 2 | 3 | 0 |
| 9  | 3 | 2 | 3 | 1 |
| 11 | 3 | 1 | 1 | 2 |
| 10 | 4 | 1 | 1 | 2 |
| 10 | 4 | 2 | 3 | 0 |
| 6  | 0 | 1 | 8 | 0 |
| 0  | 1 | 2 | 3 | 2 |
| 0  | 1 | 3 | 4 | 5 |
| 7  | 5 | 5 | 9 | 0 |
| 8  | 0 | 1 | 8 | 0 |
| 6  | 1 | 0 | 0 | 0 |
| 1  | 3 | 3 | 3 | 0 |
| 5  | 1 | 3 | 0 | 0 |
| 4  | 2 | 4 | 7 | 4 |
| 4  | 2 | 2 | 3 | 1 |
| 4  | 2 | 3 | 0 | 1 |
| 5  | 1 | 1 | 0 | 0 |
| 4  | 3 | 4 | 3 | 0 |
| 13 | 3 | 2 | 0 | 1 |
| 10 | 4 | 2 | 3 | 0 |
| 2  | 4 | 4 | 5 | 0 |
| 3  | 2 | 3 | 1 | 0 |
| 1  | 2 | 3 | 5 | 2 |
| 2  | 1 | 3 | 1 | 2 |
|    |   |   |   |   |

|       | <b>Metabolites after MDS using ADMET (112) (used for HCA and Scaffold analysis)</b> |       |       |       |
|-------|-------------------------------------------------------------------------------------|-------|-------|-------|
| C2SP2 | C3SP2                                                                               | C1SP3 | C2SP3 | C3SP3 |
| 6     | 1                                                                                   | 1     | 0     | 0     |
| 4     | 5                                                                                   | 4     | 5     | 3     |
| 4     | 2                                                                                   | 4     | 5     | 4     |
| 6     | 3                                                                                   | 3     | 7     | 1     |
| 5     | 2                                                                                   | 2     | 0     | 0     |
| 8     | 4                                                                                   | 0     | 2     | 0     |
| 7     | 3                                                                                   | 5     | 6     | 1     |
| 6     | 4                                                                                   | 5     | 7     | 0     |
| 8     | 4                                                                                   | 0     | 2     | 0     |
| 6     | 4                                                                                   | 5     | 7     | 0     |
| 6     | 3                                                                                   | 4     | 5     | 2     |
| 6     | 4                                                                                   | 6     | 5     | 2     |
| 5     | 5                                                                                   | 4     | 6     | 1     |
| 5     | 3                                                                                   | 4     | 8     | 1     |
| 7     | 5                                                                                   | 4     | 4     | 1     |
| 5     | 2                                                                                   | 0     | 6     | 0     |
| 4     | 4                                                                                   | 4     | 6     | 2     |
| 5     | 3                                                                                   | 4     | 6     | 3     |
| 6     | 3                                                                                   | 4     | 5     | 3     |
| 4     | 4                                                                                   | 4     | 7     | 2     |
| 4     | 2                                                                                   | 4     | 7     | 4     |
| 4     | 3                                                                                   | 3     | 7     | 3     |
| 4     | 4                                                                                   | 6     | 7     | 2     |
| 5     | 3                                                                                   | 4     | 6     | 3     |
| 4     | 3                                                                                   | 6     | 4     | 4     |
| 5     | 4                                                                                   | 4     | 6     | 2     |
| 6     | 4                                                                                   | 5     | 7     | 0     |
| 4     | 2                                                                                   | 0     | 7     | 0     |
| 10    | 6                                                                                   | 3     | 5     | 0     |
| 5     | 3                                                                                   | 3     | 6     | 3     |
| 4     | 2                                                                                   | 0     | 7     | 0     |
| 6     | 3                                                                                   | 4     | 3     | 2     |
| 4     | 3                                                                                   | 3     | 5     | 3     |
| 4     | 3                                                                                   | 4     | 4     | 4     |
| 6     | 2                                                                                   | 4     | 6     | 2     |

|    |   |   |   |   |
|----|---|---|---|---|
| 7  | 2 | 4 | 6 | 2 |
| 6  | 4 | 4 | 6 | 1 |
| 6  | 4 | 4 | 4 | 1 |
| 5  | 3 | 4 | 6 | 2 |
| 3  | 3 | 4 | 6 | 4 |
| 4  | 2 | 4 | 4 | 4 |
| 5  | 4 | 3 | 6 | 2 |
| 5  | 4 | 3 | 6 | 2 |
| 5  | 4 | 3 | 2 | 2 |
| 5  | 4 | 3 | 4 | 2 |
| 3  | 4 | 3 | 7 | 3 |
| 4  | 3 | 3 | 7 | 3 |
| 7  | 5 | 4 | 4 | 1 |
| 4  | 2 | 4 | 5 | 4 |
| 7  | 6 | 3 | 4 | 0 |
| 7  | 6 | 3 | 2 | 0 |
| 7  | 5 | 4 | 4 | 1 |
| 7  | 5 | 4 | 4 | 1 |
| 7  | 5 | 4 | 1 | 1 |
| 7  | 5 | 4 | 3 | 1 |
| 7  | 5 | 4 | 0 | 1 |
| 7  | 3 | 4 | 2 | 1 |
| 4  | 2 | 4 | 2 | 4 |
| 3  | 3 | 4 | 2 | 4 |
| 7  | 6 | 3 | 4 | 0 |
| 5  | 2 | 0 | 6 | 0 |
| 4  | 4 | 4 | 5 | 2 |
| 7  | 5 | 4 | 2 | 1 |
| 5  | 1 | 2 | 1 | 1 |
| 6  | 2 | 4 | 7 | 2 |
| 7  | 2 | 4 | 6 | 2 |
| 7  | 2 | 4 | 6 | 2 |
| 8  | 4 | 5 | 4 | 1 |
| 4  | 2 | 2 | 0 | 1 |
| 4  | 4 | 4 | 2 | 3 |
| 11 | 5 | 3 | 5 | 0 |
| 7  | 6 | 3 | 4 | 0 |
| 4  | 3 | 3 | 5 | 3 |
| 4  | 3 | 3 | 7 | 3 |
| 5  | 3 | 4 | 6 | 3 |
| 4  | 4 | 4 | 6 | 3 |

|        |                                                             |         |        |          |
|--------|-------------------------------------------------------------|---------|--------|----------|
| 5      | 3                                                           | 4       | 4      | 3        |
| 4      | 5                                                           | 4       | 4      | 3        |
| 5      | 4                                                           | 4       | 4      | 3        |
| 5      | 3                                                           | 4       | 5      | 3        |
| 5      | 3                                                           | 4       | 2      | 3        |
| 4      | 4                                                           | 4       | 6      | 3        |
| 4      | 4                                                           | 4       | 6      | 3        |
| 4      | 4                                                           | 4       | 5      | 3        |
| 4      | 4                                                           | 3       | 6      | 3        |
| 6      | 3                                                           | 4       | 4      | 4        |
| 5      | 5                                                           | 3       | 5      | 2        |
| 11     | 5                                                           | 3       | 5      | 0        |
| 4      | 2                                                           | 4       | 7      | 4        |
| 11     | 5                                                           | 3       | 5      | 0        |
| 4      | 3                                                           | 4       | 6      | 4        |
| 11     | 4                                                           | 2       | 3      | 3        |
| 11     | 4                                                           | 2       | 3      | 3        |
| 11     | 4                                                           | 2       | 3      | 3        |
| 11     | 3                                                           | 3       | 3      | 4        |
| 5      | 4                                                           | 3       | 5      | 2        |
| 7      | 5                                                           | 4       | 3      | 1        |
| 7      | 5                                                           | 4       | 1      | 1        |
| 5      | 4                                                           | 5       | 9      | 2        |
| 5      | 4                                                           | 5       | 7      | 2        |
| 10     | 4                                                           | 3       | 4      | 3        |
| 9      | 5                                                           | 3       | 4      | 3        |
| 4      | 2                                                           | 4       | 0      | 2        |
| 4      | 4                                                           | 4       | 8      | 1        |
| 10     | 4                                                           | 2       | 3      | 0        |
| 9      | 5                                                           | 2       | 3      | 0        |
| 9      | 3                                                           | 2       | 3      | 1        |
| 10     | 4                                                           | 1       | 1      | 2        |
| 10     | 4                                                           | 2       | 3      | 0        |
| 4      | 2                                                           | 4       | 7      | 4        |
| 4      | 2                                                           | 2       | 3      | 1        |
| 4      | 2                                                           | 3       | 0      | 1        |
|        |                                                             |         |        |          |
|        | <b>468 Metabolites and positive &amp; negative controls</b> |         |        |          |
| nHBDon | nHBAcc                                                      | nAtomLC | nAtomP | nAtomLAC |
|        |                                                             |         |        |          |

|   |   |   |    |   |
|---|---|---|----|---|
| 1 | 4 | 5 | 10 | 5 |
| 0 | 3 | 4 | 6  | 3 |
| 1 | 4 | 5 | 7  | 2 |
| 0 | 4 | 5 | 6  | 2 |
| 0 | 3 | 4 | 6  | 3 |
| 0 | 3 | 5 | 12 | 4 |
| 0 | 3 | 5 | 9  | 4 |
| 0 | 5 | 4 | 9  | 3 |
| 0 | 2 | 5 | 12 | 2 |
| 0 | 5 | 4 | 9  | 0 |
| 1 | 2 | 2 | 8  | 0 |
| 1 | 3 | 5 | 8  | 2 |
| 1 | 1 | 0 | 8  | 0 |
| 0 | 4 | 5 | 6  | 4 |
| 0 | 3 | 9 | 9  | 3 |
| 0 | 1 | 6 | 12 | 4 |
| 1 | 4 | 5 | 6  | 4 |
| 1 | 1 | 3 | 0  | 0 |
| 0 | 1 | 6 | 12 | 4 |
| 0 | 2 | 5 | 12 | 2 |
| 2 | 3 | 5 | 8  | 5 |
| 0 | 3 | 4 | 9  | 3 |
| 0 | 4 | 3 | 10 | 0 |
| 0 | 2 | 2 | 8  | 0 |
| 1 | 2 | 0 | 8  | 0 |
| 0 | 2 | 8 | 6  | 6 |
| 1 | 2 | 4 | 7  | 3 |
| 0 | 4 | 5 | 6  | 4 |
| 0 | 3 | 5 | 6  | 0 |
| 2 | 2 | 0 | 8  | 0 |
| 2 | 1 | 0 | 8  | 0 |
| 1 | 3 | 2 | 8  | 0 |
| 2 | 3 | 0 | 8  | 0 |
| 0 | 4 | 6 | 9  | 3 |
| 0 | 3 | 9 | 6  | 7 |
| 1 | 3 | 4 | 9  | 0 |
| 0 | 3 | 4 | 6  | 3 |
| 0 | 3 | 4 | 6  | 3 |
| 0 | 3 | 9 | 6  | 4 |
| 0 | 3 | 7 | 6  | 7 |
| 0 | 3 | 6 | 9  | 3 |

|   |   |    |    |    |
|---|---|----|----|----|
| 1 | 1 | 2  | 7  | 2  |
| 1 | 1 | 2  | 7  | 2  |
| 1 | 4 | 5  | 6  | 3  |
| 1 | 4 | 5  | 7  | 3  |
| 1 | 5 | 5  | 6  | 4  |
| 0 | 3 | 4  | 6  | 3  |
| 0 | 3 | 5  | 6  | 0  |
| 0 | 1 | 2  | 7  | 0  |
| 1 | 5 | 6  | 6  | 2  |
| 0 | 7 | 5  | 9  | 3  |
| 0 | 4 | 4  | 9  | 3  |
| 0 | 3 | 3  | 8  | 0  |
| 0 | 2 | 2  | 8  | 0  |
| 0 | 3 | 4  | 9  | 3  |
| 0 | 3 | 5  | 6  | 0  |
| 0 | 3 | 4  | 6  | 3  |
| 0 | 3 | 4  | 9  | 0  |
| 0 | 2 | 2  | 6  | 2  |
| 1 | 3 | 5  | 11 | 0  |
| 1 | 1 | 4  | 8  | 3  |
| 0 | 1 | 0  | 17 | 0  |
| 1 | 1 | 3  | 9  | 2  |
| 2 | 3 | 24 | 3  | 20 |
| 2 | 4 | 24 | 3  | 20 |
| 2 | 3 | 24 | 3  | 20 |
| 2 | 3 | 26 | 3  | 22 |
| 2 | 3 | 24 | 2  | 20 |
| 3 | 2 | 23 | 8  | 20 |
| 3 | 2 | 21 | 8  | 18 |
| 1 | 2 | 19 | 3  | 18 |
| 1 | 3 | 24 | 3  | 20 |
| 0 | 2 | 0  | 6  | 0  |
| 0 | 2 | 3  | 3  | 0  |
| 3 | 5 | 6  | 4  | 5  |
| 1 | 1 | 5  | 0  | 2  |
| 5 | 6 | 2  | 0  | 0  |
| 2 | 5 | 7  | 3  | 5  |
| 3 | 4 | 4  | 5  | 3  |
| 2 | 3 | 6  | 3  | 5  |
| 1 | 3 | 4  | 3  | 3  |
| 2 | 3 | 6  | 3  | 5  |

|   |   |    |    |    |
|---|---|----|----|----|
| 3 | 4 | 8  | 3  | 6  |
| 2 | 3 | 7  | 3  | 4  |
| 2 | 3 | 4  | 6  | 3  |
| 0 | 3 | 4  | 5  | 3  |
| 5 | 6 | 6  | 16 | 5  |
| 2 | 4 | 3  | 7  | 2  |
| 3 | 3 | 4  | 9  | 3  |
| 3 | 3 | 4  | 7  | 3  |
| 2 | 3 | 5  | 3  | 4  |
| 1 | 0 | 5  | 8  | 5  |
| 1 | 2 | 3  | 2  | 0  |
| 0 | 0 | 0  | 6  | 0  |
| 0 | 0 | 2  | 6  | 0  |
| 3 | 6 | 0  | 9  | 0  |
| 0 | 0 | 0  | 6  | 0  |
| 0 | 0 | 2  | 6  | 0  |
| 1 | 1 | 5  | 0  | 4  |
| 1 | 2 | 8  | 0  | 4  |
| 1 | 1 | 7  | 0  | 6  |
| 1 | 1 | 12 | 0  | 11 |
| 0 | 0 | 6  | 0  | 6  |
| 0 | 0 | 5  | 0  | 5  |
| 1 | 0 | 0  | 7  | 0  |
| 1 | 0 | 3  | 7  | 0  |
| 0 | 2 | 2  | 6  | 0  |
| 0 | 2 | 0  | 6  | 0  |
| 0 | 1 | 4  | 2  | 4  |
| 1 | 2 | 8  | 0  | 4  |
| 0 | 1 | 3  | 8  | 0  |
| 0 | 0 | 2  | 8  | 0  |
| 1 | 2 | 6  | 0  | 2  |
| 1 | 1 | 7  | 0  | 7  |
| 0 | 0 | 2  | 6  | 0  |
| 1 | 1 | 5  | 10 | 5  |
| 1 | 3 | 8  | 9  | 8  |
| 0 | 1 | 7  | 2  | 7  |
| 1 | 1 | 3  | 9  | 0  |
| 0 | 2 | 3  | 6  | 0  |
| 1 | 1 | 0  | 0  | 0  |
| 0 | 0 | 0  | 10 | 0  |
| 1 | 1 | 0  | 5  | 0  |

|   |   |    |    |    |
|---|---|----|----|----|
| 1 | 1 | 3  | 0  | 3  |
| 0 | 0 | 5  | 0  | 5  |
| 0 | 0 | 4  | 3  | 0  |
| 1 | 1 | 4  | 7  | 2  |
| 1 | 2 | 4  | 10 | 0  |
| 1 | 2 | 5  | 12 | 3  |
| 2 | 1 | 3  | 8  | 3  |
| 1 | 0 | 0  | 7  | 0  |
| 0 | 0 | 6  | 2  | 6  |
| 0 | 0 | 2  | 6  | 0  |
| 0 | 0 | 2  | 6  | 0  |
| 2 | 1 | 5  | 10 | 5  |
| 0 | 1 | 3  | 8  | 0  |
| 0 | 1 | 3  | 8  | 0  |
| 0 | 0 | 7  | 0  | 7  |
| 0 | 1 | 0  | 4  | 0  |
| 0 | 0 | 5  | 0  | 5  |
| 1 | 2 | 4  | 10 | 0  |
| 1 | 1 | 5  | 0  | 5  |
| 2 | 0 | 2  | 17 | 0  |
| 3 | 0 | 2  | 19 | 0  |
| 1 | 1 | 5  | 13 | 5  |
| 2 | 1 | 8  | 11 | 8  |
| 0 | 0 | 0  | 2  | 0  |
| 0 | 1 | 3  | 10 | 0  |
| 1 | 0 | 2  | 17 | 0  |
| 0 | 0 | 2  | 12 | 0  |
| 0 | 0 | 10 | 0  | 10 |
| 0 | 2 | 0  | 6  | 0  |
| 1 | 0 | 2  | 8  | 0  |
| 1 | 1 | 3  | 6  | 2  |
| 1 | 2 | 0  | 7  | 0  |
| 1 | 2 | 5  | 11 | 5  |
| 1 | 2 | 5  | 17 | 5  |
| 0 | 4 | 8  | 11 | 8  |
| 2 | 1 | 8  | 11 | 8  |
| 0 | 1 | 2  | 8  | 0  |
| 2 | 2 | 8  | 11 | 8  |
| 3 | 0 | 5  | 15 | 5  |
| 0 | 0 | 0  | 6  | 0  |
| 0 | 2 | 3  | 3  | 3  |



|   |   |   |    |   |
|---|---|---|----|---|
| 3 | 3 | 5 | 11 | 5 |
| 3 | 3 | 5 | 11 | 5 |
| 2 | 3 | 5 | 10 | 5 |
| 1 | 3 | 5 | 10 | 5 |
| 3 | 1 | 0 | 14 | 0 |
| 3 | 0 | 4 | 20 | 4 |
| 2 | 2 | 5 | 12 | 5 |
| 1 | 0 | 5 | 12 | 5 |
| 2 | 1 | 5 | 8  | 5 |
| 2 | 0 | 5 | 15 | 5 |
| 0 | 1 | 2 | 8  | 0 |
| 1 | 3 | 5 | 13 | 5 |
| 3 | 2 | 5 | 10 | 5 |
| 3 | 2 | 5 | 18 | 5 |
| 2 | 0 | 5 | 15 | 5 |
| 2 | 1 | 5 | 8  | 5 |
| 1 | 1 | 5 | 8  | 5 |
| 1 | 1 | 5 | 10 | 5 |
| 0 | 4 | 2 | 18 | 0 |
| 1 | 1 | 5 | 8  | 5 |
| 2 | 1 | 5 | 8  | 5 |
| 2 | 2 | 5 | 10 | 5 |
| 2 | 1 | 5 | 8  | 5 |
| 2 | 2 | 4 | 8  | 3 |
| 1 | 1 | 5 | 12 | 5 |
| 2 | 4 | 5 | 11 | 5 |
| 2 | 4 | 5 | 11 | 5 |
| 2 | 0 | 8 | 8  | 8 |
| 0 | 1 | 3 | 2  | 0 |
| 1 | 2 | 3 | 3  | 0 |
| 1 | 2 | 3 | 3  | 0 |
| 0 | 1 | 3 | 2  | 0 |
| 2 | 1 | 8 | 11 | 8 |
| 0 | 4 | 8 | 11 | 8 |
| 0 | 1 | 4 | 4  | 3 |
| 0 | 1 | 3 | 8  | 0 |
| 0 | 0 | 0 | 2  | 0 |
| 1 | 1 | 7 | 2  | 7 |
| 0 | 0 | 3 | 2  | 0 |
| 0 | 0 | 3 | 2  | 0 |
| 1 | 2 | 5 | 11 | 5 |

|   |   |    |    |    |
|---|---|----|----|----|
| 2 | 1 | 2  | 8  | 0  |
| 0 | 0 | 0  | 2  | 0  |
| 0 | 0 | 5  | 2  | 5  |
| 0 | 0 | 3  | 2  | 0  |
| 0 | 0 | 3  | 2  | 0  |
| 1 | 1 | 3  | 2  | 0  |
| 0 | 0 | 3  | 2  | 0  |
| 0 | 0 | 0  | 2  | 0  |
| 0 | 0 | 0  | 2  | 0  |
| 1 | 1 | 4  | 2  | 4  |
| 1 | 2 | 19 | 3  | 18 |
| 0 | 0 | 0  | 2  | 0  |
| 0 | 1 | 4  | 10 | 3  |
| 0 | 0 | 3  | 4  | 0  |
| 0 | 0 | 0  | 2  | 0  |
| 0 | 0 | 3  | 2  | 0  |
| 1 | 2 | 5  | 11 | 5  |
| 0 | 0 | 3  | 4  | 0  |
| 1 | 1 | 3  | 2  | 0  |
| 0 | 0 | 3  | 2  | 0  |
| 0 | 0 | 5  | 2  | 5  |
| 0 | 0 | 3  | 2  | 0  |
| 3 | 3 | 4  | 11 | 4  |
| 3 | 2 | 8  | 11 | 8  |
| 2 | 2 | 4  | 11 | 4  |
| 2 | 2 | 8  | 11 | 8  |
| 0 | 0 | 3  | 9  | 3  |
| 1 | 1 | 5  | 8  | 5  |
| 2 | 5 | 7  | 3  | 7  |
| 2 | 2 | 5  | 13 | 5  |
| 2 | 2 | 3  | 11 | 0  |
| 3 | 0 | 0  | 20 | 0  |
| 3 | 0 | 4  | 19 | 4  |
| 2 | 0 | 4  | 18 | 4  |
| 5 | 2 | 4  | 17 | 4  |
| 4 | 2 | 4  | 16 | 4  |
| 0 | 0 | 0  | 2  | 0  |
| 0 | 0 | 0  | 2  | 0  |
| 0 | 1 | 2  | 8  | 0  |
| 0 | 1 | 2  | 8  | 0  |
| 0 | 1 | 2  | 14 | 0  |

|   |   |    |    |    |
|---|---|----|----|----|
| 0 | 1 | 4  | 6  | 3  |
| 0 | 2 | 4  | 6  | 0  |
| 1 | 1 | 2  | 6  | 0  |
| 0 | 2 | 4  | 6  | 0  |
| 0 | 1 | 3  | 6  | 2  |
| 2 | 1 | 2  | 8  | 0  |
| 0 | 1 | 0  | 2  | 0  |
| 0 | 0 | 0  | 2  | 0  |
| 0 | 0 | 0  | 2  | 0  |
| 0 | 0 | 3  | 2  | 0  |
| 1 | 1 | 3  | 2  | 0  |
| 1 | 1 | 0  | 0  | 0  |
| 1 | 2 | 5  | 11 | 5  |
| 1 | 2 | 4  | 6  | 2  |
| 0 | 1 | 4  | 6  | 4  |
| 0 | 0 | 3  | 4  | 0  |
| 0 | 0 | 0  | 2  | 0  |
| 0 | 0 | 3  | 2  | 0  |
| 3 | 7 | 17 | 3  | 16 |
| 2 | 2 | 3  | 5  | 2  |
| 1 | 2 | 4  | 10 | 4  |
| 3 | 3 | 3  | 11 | 3  |
| 2 | 1 | 3  | 8  | 3  |
| 3 | 2 | 3  | 8  | 3  |
| 1 | 1 | 0  | 0  | 0  |
| 1 | 2 | 5  | 11 | 5  |
| 0 | 0 | 4  | 0  | 4  |
| 0 | 2 | 7  | 3  | 4  |
| 2 | 2 | 8  | 11 | 8  |
| 0 | 0 | 0  | 2  | 0  |
| 0 | 0 | 0  | 2  | 0  |
| 1 | 2 | 5  | 10 | 5  |
| 0 | 1 | 5  | 12 | 5  |
| 1 | 0 | 5  | 10 | 5  |
| 2 | 2 | 5  | 13 | 5  |
| 1 | 0 | 5  | 10 | 5  |
| 2 | 2 | 5  | 13 | 5  |
| 0 | 0 | 5  | 8  | 5  |
| 0 | 1 | 5  | 10 | 5  |
| 1 | 0 | 5  | 8  | 5  |
| 2 | 2 | 5  | 11 | 5  |

|   |   |   |    |   |
|---|---|---|----|---|
| 1 | 0 | 3 | 8  | 3 |
| 2 | 0 | 5 | 8  | 5 |
| 3 | 2 | 5 | 11 | 5 |
| 1 | 0 | 5 | 8  | 5 |
| 2 | 0 | 3 | 8  | 3 |
| 2 | 0 | 3 | 8  | 3 |
| 3 | 2 | 3 | 11 | 3 |
| 3 | 3 | 5 | 11 | 5 |
| 3 | 3 | 5 | 11 | 5 |
| 2 | 1 | 5 | 8  | 5 |
| 3 | 0 | 4 | 21 | 4 |
| 1 | 0 | 5 | 14 | 5 |
| 2 | 0 | 8 | 8  | 8 |
| 2 | 2 | 8 | 11 | 8 |
| 3 | 2 | 8 | 11 | 8 |
| 1 | 0 | 8 | 8  | 8 |
| 0 | 2 | 8 | 8  | 8 |
| 2 | 0 | 8 | 8  | 8 |
| 3 | 2 | 8 | 11 | 8 |
| 2 | 1 | 3 | 8  | 3 |
| 3 | 2 | 4 | 8  | 4 |
| 2 | 0 | 8 | 8  | 8 |
| 3 | 2 | 8 | 11 | 8 |
| 2 | 0 | 5 | 16 | 5 |
| 2 | 0 | 3 | 16 | 3 |
| 0 | 0 | 5 | 14 | 5 |
| 1 | 0 | 5 | 14 | 5 |
| 1 | 0 | 2 | 14 | 2 |
| 1 | 0 | 4 | 14 | 4 |
| 2 | 2 | 5 | 17 | 5 |
| 1 | 0 | 0 | 14 | 0 |
| 1 | 0 | 5 | 10 | 5 |
| 2 | 2 | 5 | 13 | 5 |
| 0 | 0 | 0 | 8  | 0 |
| 1 | 0 | 0 | 8  | 0 |
| 2 | 2 | 3 | 11 | 0 |
| 0 | 0 | 5 | 16 | 5 |
| 3 | 2 | 5 | 8  | 5 |
| 4 | 6 | 8 | 3  | 7 |
| 8 | 4 | 5 | 26 | 2 |
| 8 | 4 | 5 | 13 | 2 |

|   |   |    |    |    |
|---|---|----|----|----|
| 7 | 4 | 5  | 13 | 2  |
| 6 | 4 | 5  | 13 | 2  |
| 1 | 1 | 2  | 8  | 0  |
| 3 | 2 | 5  | 10 | 5  |
| 2 | 2 | 3  | 9  | 3  |
| 1 | 0 | 3  | 14 | 3  |
| 3 | 0 | 8  | 21 | 8  |
| 3 | 0 | 4  | 21 | 4  |
| 3 | 0 | 8  | 21 | 8  |
| 1 | 2 | 4  | 11 | 0  |
| 4 | 2 | 8  | 8  | 8  |
| 1 | 0 | 3  | 7  | 0  |
| 0 | 1 | 3  | 4  | 0  |
| 3 | 4 | 5  | 11 | 5  |
| 0 | 2 | 3  | 3  | 0  |
| 1 | 1 | 17 | 0  | 16 |
| 1 | 1 | 2  | 16 | 2  |
| 2 | 2 | 5  | 13 | 5  |
| 3 | 0 | 2  | 21 | 0  |
| 1 | 1 | 0  | 0  | 0  |
| 0 | 0 | 12 | 4  | 12 |
| 0 | 0 | 7  | 2  | 7  |
| 0 | 0 | 8  | 4  | 8  |
| 0 | 0 | 3  | 0  | 0  |
| 0 | 2 | 11 | 3  | 8  |
| 0 | 2 | 11 | 3  | 8  |
| 2 | 3 | 6  | 10 | 5  |
| 1 | 3 | 5  | 10 | 5  |
| 0 | 1 | 5  | 12 | 5  |
| 1 | 0 | 9  | 10 | 9  |
| 0 | 0 | 3  | 6  | 0  |
| 0 | 1 | 3  | 8  | 0  |
| 2 | 2 | 9  | 13 | 9  |
| 2 | 2 | 3  | 11 | 0  |
| 0 | 1 | 11 | 2  | 10 |
| 1 | 0 | 4  | 8  | 4  |
| 1 | 0 | 8  | 8  | 8  |
| 1 | 0 | 5  | 16 | 5  |
| 0 | 0 | 0  | 2  | 0  |
| 1 | 0 | 3  | 8  | 3  |
| 1 | 0 | 5  | 8  | 5  |

|   |   |    |    |    |
|---|---|----|----|----|
| 1 | 0 | 5  | 8  | 5  |
| 2 | 2 | 5  | 11 | 5  |
| 1 | 0 | 3  | 8  | 3  |
| 2 | 2 | 4  | 11 | 4  |
| 1 | 0 | 4  | 8  | 4  |
| 1 | 0 | 4  | 8  | 4  |
| 1 | 0 | 0  | 8  | 0  |
| 2 | 2 | 5  | 11 | 5  |
| 2 | 2 | 5  | 11 | 5  |
| 2 | 2 | 4  | 11 | 4  |
| 0 | 0 | 3  | 2  | 0  |
| 3 | 2 | 4  | 11 | 4  |
| 2 | 0 | 4  | 8  | 4  |
| 2 | 2 | 5  | 11 | 5  |
| 3 | 1 | 5  | 11 | 5  |
| 4 | 1 | 8  | 11 | 8  |
| 3 | 1 | 0  | 11 | 0  |
| 3 | 1 | 0  | 11 | 0  |
| 1 | 2 | 5  | 2  | 5  |
| 0 | 4 | 7  | 12 | 4  |
| 0 | 4 | 5  | 12 | 0  |
| 0 | 2 | 5  | 6  | 3  |
| 0 | 2 | 3  | 3  | 0  |
| 0 | 0 | 3  | 0  | 0  |
| 0 | 0 | 12 | 0  | 12 |
| 0 | 2 | 5  | 16 | 3  |
| 0 | 0 | 0  | 6  | 0  |
| 0 | 2 | 5  | 9  | 4  |
| 1 | 2 | 5  | 11 | 5  |
| 0 | 0 | 3  | 7  | 3  |
| 0 | 2 | 5  | 3  | 0  |
| 2 | 2 | 4  | 0  | 2  |
| 0 | 1 | 0  | 0  | 0  |
| 1 | 1 | 0  | 0  | 0  |
| 2 | 2 | 8  | 11 | 8  |
| 1 | 0 | 3  | 8  | 3  |
| 0 | 1 | 3  | 10 | 3  |
| 0 | 1 | 0  | 2  | 0  |
| 1 | 1 | 0  | 0  | 0  |
| 3 | 2 | 7  | 8  | 7  |
| 3 | 2 | 7  | 8  | 7  |

|   |   |    |    |    |
|---|---|----|----|----|
| 3 | 1 | 7  | 8  | 7  |
| 1 | 2 | 3  | 3  | 0  |
| 0 | 1 | 2  | 7  | 0  |
| 0 | 1 | 4  | 6  | 3  |
| 0 | 0 | 7  | 4  | 7  |
| 1 | 1 | 3  | 2  | 0  |
| 0 | 0 | 3  | 2  | 0  |
| 0 | 2 | 2  | 3  | 0  |
| 0 | 0 | 3  | 2  | 0  |
| 0 | 0 | 3  | 2  | 0  |
| 3 | 1 | 4  | 8  | 4  |
| 1 | 1 | 0  | 0  | 0  |
| 5 | 4 | 6  | 13 | 3  |
| 1 | 0 | 2  | 8  | 0  |
| 2 | 0 | 8  | 8  | 8  |
| 0 | 1 | 8  | 2  | 7  |
| 0 | 0 | 16 | 0  | 16 |
| 1 | 0 | 5  | 8  | 5  |
| 0 | 1 | 7  | 2  | 6  |
| 0 | 2 | 8  | 3  | 6  |
| 0 | 2 | 10 | 3  | 6  |
| 2 | 0 | 6  | 7  | 6  |
| 1 | 1 | 4  | 7  | 2  |
| 3 | 0 | 8  | 8  | 8  |
| 1 | 1 | 8  | 4  | 8  |
| 1 | 1 | 5  | 0  | 4  |
| 0 | 2 | 3  | 3  | 0  |
| 0 | 3 | 6  | 3  | 2  |
| 0 | 0 | 3  | 0  | 0  |
| 0 | 1 | 4  | 2  | 3  |
| 0 | 1 | 4  | 8  | 3  |
| 3 | 2 | 5  | 8  | 5  |
| 0 | 2 | 4  | 3  | 0  |
| 0 | 0 | 0  | 6  | 0  |
| 1 | 0 | 3  | 10 | 3  |
| 0 | 0 | 3  | 2  | 0  |
| 0 | 0 | 4  | 4  | 4  |
| 0 | 1 | 0  | 10 | 0  |
| 4 | 0 | 0  | 21 | 0  |
| 0 | 2 | 0  | 0  | 0  |
| 0 | 0 | 3  | 2  | 0  |

|   |   |    |    |    |
|---|---|----|----|----|
| 1 | 1 | 8  | 2  | 8  |
| 0 | 2 | 9  | 3  | 8  |
| 1 | 2 | 19 | 3  | 18 |
| 0 | 0 | 0  | 2  | 0  |
| 4 | 0 | 0  | 21 | 0  |
| 2 | 0 | 3  | 16 | 2  |
| 3 | 0 | 3  | 17 | 2  |
| 2 | 0 | 3  | 17 | 0  |
| 2 | 1 | 0  | 17 | 0  |
| 0 | 0 | 3  | 6  | 0  |
| 0 | 1 | 4  | 4  | 3  |
| 0 | 3 | 7  | 9  | 3  |
| 0 | 2 | 4  | 3  | 0  |
| 0 | 3 | 4  | 12 | 0  |
| 1 | 3 | 4  | 10 | 0  |
| 0 | 2 | 4  | 9  | 0  |
| 1 | 3 | 4  | 4  | 0  |
| 0 | 1 | 7  | 6  | 7  |
| 0 | 2 | 9  | 3  | 7  |
| 2 | 2 | 3  | 2  | 0  |
| 0 | 0 | 3  | 10 | 3  |
| 1 | 2 | 4  | 10 | 0  |
| 0 | 2 | 7  | 3  | 5  |
| 0 | 0 | 3  | 0  | 0  |
| 2 | 0 | 5  | 8  | 5  |
| 0 | 1 | 7  | 2  | 7  |
| 1 | 0 | 3  | 7  | 3  |
| 0 | 0 | 8  | 4  | 8  |
| 1 | 1 | 9  | 2  | 8  |
| 1 | 1 | 12 | 2  | 12 |
| 0 | 0 | 3  | 9  | 0  |
| 0 | 1 | 10 | 2  | 9  |
| 0 | 0 | 9  | 0  | 9  |
| 2 | 0 | 4  | 8  | 4  |
| 1 | 0 | 4  | 14 | 4  |
| 1 | 0 | 2  | 14 | 2  |
| 3 | 2 | 6  | 12 | 3  |
| 3 | 2 | 6  | 13 | 3  |
| 0 | 1 | 9  | 2  | 8  |
| 0 | 0 | 3  | 6  | 0  |
| 0 | 0 | 2  | 8  | 0  |



|   |   |    |    |    |
|---|---|----|----|----|
| 1 | 0 | 2  | 8  | 0  |
| 1 | 2 | 19 | 3  | 18 |
| 1 | 0 | 8  | 8  | 8  |
| 0 | 1 | 3  | 8  | 0  |
| 1 | 0 | 6  | 8  | 5  |
| 0 | 0 | 6  | 8  | 5  |
| 1 | 0 | 5  | 8  | 5  |
| 0 | 0 | 5  | 8  | 5  |
| 8 | 5 | 2  | 21 | 0  |
| 0 | 0 | 0  | 6  | 0  |
| 0 | 1 | 3  | 9  | 0  |
| 1 | 1 | 0  | 7  | 0  |
| 0 | 0 | 3  | 6  | 0  |
| 0 | 0 | 15 | 0  | 15 |
| 0 | 0 | 0  | 6  | 0  |
| 0 | 1 | 6  | 2  | 5  |
| 0 | 1 | 3  | 4  | 0  |
| 1 | 0 | 2  | 8  | 2  |
| 2 | 2 | 3  | 11 | 2  |
| 0 | 0 | 2  | 6  | 0  |
| 1 | 0 | 0  | 7  | 0  |
| 1 | 1 | 3  | 6  | 2  |
| 1 | 1 | 0  | 0  | 0  |
| 0 | 1 | 2  | 10 | 0  |
| 0 | 1 | 3  | 8  | 0  |
| 0 | 1 | 4  | 2  | 3  |
| 1 | 0 | 3  | 7  | 0  |
| 0 | 3 | 7  | 5  | 3  |
| 1 | 1 | 4  | 0  | 3  |
| 2 | 2 | 4  | 0  | 3  |
| 1 | 0 | 3  | 7  | 3  |
| 0 | 0 | 0  | 6  | 0  |
| 5 | 0 | 0  | 22 | 0  |
| 2 | 1 | 5  | 8  | 5  |
| 3 | 3 | 5  | 11 | 5  |
| 1 | 0 | 2  | 8  | 2  |
| 2 | 2 | 3  | 11 | 2  |
| 1 | 0 | 2  | 8  | 2  |
| 0 | 0 | 2  | 16 | 2  |
| 2 | 2 | 3  | 19 | 2  |
| 2 | 0 | 2  | 8  | 2  |

|        |                                                                                     |         |        |          |  |
|--------|-------------------------------------------------------------------------------------|---------|--------|----------|--|
| 2      | 2                                                                                   | 5       | 11     | 5        |  |
| 1      | 2                                                                                   | 17      | 3      | 16       |  |
| 0      | 0                                                                                   | 3       | 2      | 0        |  |
| 1      | 1                                                                                   | 2       | 9      | 0        |  |
| 0      | 0                                                                                   | 3       | 2      | 0        |  |
| 2      | 0                                                                                   | 12      | 8      | 12       |  |
| 1      | 2                                                                                   | 19      | 3      | 18       |  |
| 0      | 0                                                                                   | 2       | 8      | 0        |  |
| 1      | 1                                                                                   | 3       | 0      | 3        |  |
| 0      | 0                                                                                   | 3       | 2      | 0        |  |
| 0      | 0                                                                                   | 3       | 6      | 3        |  |
| 1      | 1                                                                                   | 5       | 8      | 5        |  |
| 1      | 2                                                                                   | 0       | 6      | 0        |  |
| 1      | 0                                                                                   | 3       | 7      | 0        |  |
| 0      | 0                                                                                   | 0       | 6      | 0        |  |
| 0      | 0                                                                                   | 12      | 4      | 12       |  |
| 4      | 0                                                                                   | 4       | 20     | 4        |  |
| 3      | 0                                                                                   | 4       | 8      | 4        |  |
| 0      | 0                                                                                   | 7       | 2      | 7        |  |
| 0      | 0                                                                                   | 8       | 4      | 8        |  |
| 0      | 0                                                                                   | 13      | 0      | 13       |  |
| 2      | 1                                                                                   | 3       | 7      | 2        |  |
| 0      | 0                                                                                   | 11      | 0      | 11       |  |
| 0      | 0                                                                                   | 3       | 2      | 0        |  |
| 0      | 1                                                                                   | 0       | 4      | 0        |  |
| 7      | 5                                                                                   | 2       | 20     | 0        |  |
| 4      | 2                                                                                   | 6       | 13     | 3        |  |
|        |                                                                                     |         |        |          |  |
|        | <b>Metabolites from Machine Learning Methods<br/>(330) (used for MDS using CDK)</b> |         |        |          |  |
| nHBDon | nHBAcc                                                                              | nAtomLC | nAtomP | nAtomLAC |  |
| 0      | 0                                                                                   | 0       | 6      | 0        |  |
| 0      | 0                                                                                   | 2       | 6      | 0        |  |
| 0      | 0                                                                                   | 0       | 6      | 0        |  |
| 0      | 0                                                                                   | 2       | 6      | 0        |  |
| 0      | 0                                                                                   | 6       | 0      | 6        |  |
| 1      | 0                                                                                   | 0       | 7      | 0        |  |
| 1      | 0                                                                                   | 3       | 7      | 0        |  |
| 0      | 2                                                                                   | 2       | 6      | 0        |  |
| 0      | 1                                                                                   | 3       | 8      | 0        |  |
| 0      | 0                                                                                   | 2       | 8      | 0        |  |

|   |   |    |    |    |
|---|---|----|----|----|
| 0 | 0 | 2  | 6  | 0  |
| 1 | 1 | 5  | 10 | 5  |
| 1 | 3 | 8  | 9  | 8  |
| 1 | 1 | 3  | 9  | 0  |
| 0 | 2 | 3  | 6  | 0  |
| 0 | 0 | 0  | 10 | 0  |
| 1 | 1 | 4  | 7  | 2  |
| 1 | 2 | 4  | 10 | 0  |
| 1 | 2 | 5  | 12 | 3  |
| 2 | 1 | 3  | 8  | 3  |
| 1 | 0 | 0  | 7  | 0  |
| 0 | 0 | 6  | 2  | 6  |
| 0 | 0 | 2  | 6  | 0  |
| 0 | 0 | 2  | 6  | 0  |
| 2 | 1 | 5  | 10 | 5  |
| 0 | 1 | 3  | 8  | 0  |
| 0 | 1 | 3  | 8  | 0  |
| 0 | 0 | 7  | 0  | 7  |
| 1 | 2 | 4  | 10 | 0  |
| 2 | 0 | 2  | 17 | 0  |
| 3 | 0 | 2  | 19 | 0  |
| 1 | 1 | 5  | 13 | 5  |
| 2 | 1 | 8  | 11 | 8  |
| 0 | 0 | 0  | 2  | 0  |
| 0 | 1 | 3  | 10 | 0  |
| 1 | 0 | 2  | 17 | 0  |
| 0 | 0 | 2  | 12 | 0  |
| 0 | 0 | 10 | 0  | 10 |
| 1 | 0 | 2  | 8  | 0  |
| 1 | 1 | 3  | 6  | 2  |
| 1 | 2 | 5  | 11 | 5  |
| 1 | 2 | 5  | 17 | 5  |
| 0 | 4 | 8  | 11 | 8  |
| 2 | 1 | 8  | 11 | 8  |
| 0 | 1 | 2  | 8  | 0  |
| 3 | 0 | 5  | 15 | 5  |
| 0 | 0 | 0  | 6  | 0  |
| 0 | 2 | 3  | 3  | 3  |
| 2 | 3 | 5  | 10 | 5  |
| 1 | 3 | 5  | 10 | 5  |
| 2 | 2 | 5  | 12 | 5  |

|   |   |    |    |    |
|---|---|----|----|----|
| 1 | 0 | 5  | 12 | 5  |
| 2 | 1 | 5  | 8  | 5  |
| 2 | 0 | 5  | 15 | 5  |
| 0 | 1 | 2  | 8  | 0  |
| 1 | 3 | 5  | 13 | 5  |
| 3 | 2 | 5  | 10 | 5  |
| 2 | 0 | 5  | 15 | 5  |
| 2 | 1 | 5  | 8  | 5  |
| 1 | 1 | 5  | 8  | 5  |
| 1 | 1 | 5  | 10 | 5  |
| 0 | 4 | 2  | 18 | 0  |
| 1 | 1 | 5  | 8  | 5  |
| 2 | 1 | 5  | 8  | 5  |
| 2 | 2 | 5  | 10 | 5  |
| 2 | 1 | 5  | 8  | 5  |
| 2 | 2 | 4  | 8  | 3  |
| 1 | 1 | 5  | 12 | 5  |
| 2 | 4 | 5  | 11 | 5  |
| 2 | 4 | 5  | 11 | 5  |
| 2 | 0 | 8  | 8  | 8  |
| 2 | 1 | 8  | 11 | 8  |
| 0 | 4 | 8  | 11 | 8  |
| 0 | 1 | 3  | 8  | 0  |
| 0 | 0 | 0  | 2  | 0  |
| 1 | 1 | 7  | 2  | 7  |
| 0 | 0 | 3  | 2  | 0  |
| 0 | 0 | 3  | 2  | 0  |
| 1 | 2 | 5  | 11 | 5  |
| 2 | 1 | 2  | 8  | 0  |
| 0 | 0 | 0  | 2  | 0  |
| 0 | 0 | 5  | 2  | 5  |
| 0 | 0 | 3  | 2  | 0  |
| 0 | 0 | 3  | 2  | 0  |
| 1 | 1 | 3  | 2  | 0  |
| 0 | 0 | 3  | 2  | 0  |
| 0 | 0 | 0  | 2  | 0  |
| 0 | 0 | 0  | 2  | 0  |
| 1 | 1 | 4  | 2  | 4  |
| 1 | 2 | 19 | 3  | 18 |
| 0 | 0 | 0  | 2  | 0  |
| 0 | 1 | 4  | 10 | 3  |

|   |   |   |    |   |
|---|---|---|----|---|
| 0 | 0 | 3 | 4  | 0 |
| 0 | 0 | 0 | 2  | 0 |
| 0 | 0 | 3 | 2  | 0 |
| 1 | 2 | 5 | 11 | 5 |
| 0 | 0 | 3 | 4  | 0 |
| 1 | 1 | 3 | 2  | 0 |
| 0 | 0 | 3 | 2  | 0 |
| 0 | 0 | 5 | 2  | 5 |
| 0 | 0 | 3 | 2  | 0 |
| 2 | 2 | 8 | 11 | 8 |
| 0 | 0 | 3 | 9  | 3 |
| 1 | 1 | 5 | 8  | 5 |
| 2 | 5 | 7 | 3  | 7 |
| 3 | 0 | 4 | 19 | 4 |
| 2 | 0 | 4 | 18 | 4 |
| 4 | 2 | 4 | 16 | 4 |
| 0 | 0 | 0 | 2  | 0 |
| 0 | 0 | 0 | 2  | 0 |
| 0 | 1 | 2 | 8  | 0 |
| 0 | 1 | 2 | 8  | 0 |
| 0 | 1 | 2 | 14 | 0 |
| 0 | 1 | 4 | 6  | 3 |
| 1 | 1 | 2 | 6  | 0 |
| 0 | 2 | 4 | 6  | 0 |
| 0 | 1 | 3 | 6  | 2 |
| 2 | 1 | 2 | 8  | 0 |
| 0 | 1 | 0 | 2  | 0 |
| 0 | 0 | 0 | 2  | 0 |
| 0 | 0 | 0 | 2  | 0 |
| 0 | 0 | 3 | 2  | 0 |
| 1 | 1 | 3 | 2  | 0 |
| 1 | 2 | 5 | 11 | 5 |
| 0 | 1 | 4 | 6  | 4 |
| 0 | 0 | 3 | 4  | 0 |
| 0 | 0 | 0 | 2  | 0 |
| 0 | 0 | 3 | 2  | 0 |
| 1 | 2 | 4 | 10 | 4 |
| 2 | 1 | 3 | 8  | 3 |
| 3 | 2 | 3 | 8  | 3 |
| 1 | 2 | 5 | 11 | 5 |
| 0 | 0 | 0 | 2  | 0 |

|   |   |   |    |   |
|---|---|---|----|---|
| 0 | 0 | 0 | 2  | 0 |
| 1 | 2 | 5 | 10 | 5 |
| 0 | 1 | 5 | 12 | 5 |
| 1 | 0 | 5 | 10 | 5 |
| 2 | 2 | 5 | 13 | 5 |
| 1 | 0 | 5 | 10 | 5 |
| 2 | 2 | 5 | 13 | 5 |
| 0 | 0 | 5 | 8  | 5 |
| 0 | 1 | 5 | 10 | 5 |
| 1 | 0 | 5 | 8  | 5 |
| 2 | 2 | 5 | 11 | 5 |
| 1 | 0 | 3 | 8  | 3 |
| 2 | 0 | 5 | 8  | 5 |
| 1 | 0 | 5 | 8  | 5 |
| 2 | 0 | 3 | 8  | 3 |
| 2 | 0 | 3 | 8  | 3 |
| 3 | 3 | 5 | 11 | 5 |
| 2 | 1 | 5 | 8  | 5 |
| 3 | 0 | 4 | 21 | 4 |
| 1 | 0 | 5 | 14 | 5 |
| 2 | 0 | 8 | 8  | 8 |
| 1 | 0 | 8 | 8  | 8 |
| 0 | 2 | 8 | 8  | 8 |
| 2 | 0 | 8 | 8  | 8 |
| 2 | 1 | 3 | 8  | 3 |
| 3 | 2 | 4 | 8  | 4 |
| 2 | 0 | 8 | 8  | 8 |
| 2 | 0 | 5 | 16 | 5 |
| 2 | 0 | 3 | 16 | 3 |
| 0 | 0 | 5 | 14 | 5 |
| 1 | 0 | 5 | 14 | 5 |
| 1 | 0 | 2 | 14 | 2 |
| 1 | 0 | 4 | 14 | 4 |
| 1 | 0 | 0 | 14 | 0 |
| 1 | 0 | 5 | 10 | 5 |
| 0 | 0 | 0 | 8  | 0 |
| 1 | 0 | 0 | 8  | 0 |
| 2 | 2 | 3 | 11 | 0 |
| 0 | 0 | 5 | 16 | 5 |
| 3 | 2 | 5 | 8  | 5 |
| 1 | 1 | 2 | 8  | 0 |

|   |   |    |    |    |
|---|---|----|----|----|
| 3 | 2 | 5  | 10 | 5  |
| 2 | 2 | 3  | 9  | 3  |
| 1 | 0 | 3  | 14 | 3  |
| 3 | 0 | 8  | 21 | 8  |
| 3 | 0 | 4  | 21 | 4  |
| 3 | 0 | 8  | 21 | 8  |
| 1 | 2 | 4  | 11 | 0  |
| 4 | 2 | 8  | 8  | 8  |
| 1 | 0 | 3  | 7  | 0  |
| 0 | 1 | 3  | 4  | 0  |
| 0 | 2 | 3  | 3  | 0  |
| 1 | 1 | 2  | 16 | 2  |
| 1 | 1 | 0  | 0  | 0  |
| 0 | 0 | 12 | 4  | 12 |
| 0 | 0 | 7  | 2  | 7  |
| 0 | 0 | 8  | 4  | 8  |
| 0 | 0 | 3  | 0  | 0  |
| 0 | 2 | 11 | 3  | 8  |
| 0 | 2 | 11 | 3  | 8  |
| 2 | 3 | 6  | 10 | 5  |
| 1 | 3 | 5  | 10 | 5  |
| 0 | 1 | 5  | 12 | 5  |
| 1 | 0 | 9  | 10 | 9  |
| 0 | 0 | 3  | 6  | 0  |
| 0 | 1 | 3  | 8  | 0  |
| 2 | 2 | 3  | 11 | 0  |
| 0 | 1 | 11 | 2  | 10 |
| 1 | 0 | 4  | 8  | 4  |
| 1 | 0 | 8  | 8  | 8  |
| 1 | 0 | 5  | 16 | 5  |
| 0 | 0 | 0  | 2  | 0  |
| 1 | 0 | 3  | 8  | 3  |
| 1 | 0 | 5  | 8  | 5  |
| 1 | 0 | 5  | 8  | 5  |
| 2 | 2 | 5  | 11 | 5  |
| 1 | 0 | 3  | 8  | 3  |
| 2 | 2 | 4  | 11 | 4  |
| 1 | 0 | 4  | 8  | 4  |
| 1 | 0 | 4  | 8  | 4  |
| 1 | 0 | 0  | 8  | 0  |
| 2 | 2 | 5  | 11 | 5  |

|   |   |    |    |   |
|---|---|----|----|---|
| 2 | 2 | 5  | 11 | 5 |
| 2 | 2 | 4  | 11 | 4 |
| 0 | 0 | 3  | 2  | 0 |
| 2 | 0 | 4  | 8  | 4 |
| 4 | 1 | 8  | 11 | 8 |
| 3 | 1 | 0  | 11 | 0 |
| 3 | 1 | 0  | 11 | 0 |
| 0 | 4 | 7  | 12 | 4 |
| 0 | 4 | 5  | 12 | 0 |
| 0 | 2 | 5  | 6  | 3 |
| 0 | 2 | 5  | 16 | 3 |
| 0 | 0 | 0  | 6  | 0 |
| 0 | 2 | 5  | 9  | 4 |
| 1 | 2 | 5  | 11 | 5 |
| 0 | 0 | 3  | 7  | 3 |
| 2 | 2 | 8  | 11 | 8 |
| 1 | 0 | 3  | 8  | 3 |
| 0 | 1 | 3  | 10 | 3 |
| 0 | 1 | 0  | 2  | 0 |
| 3 | 2 | 7  | 8  | 7 |
| 3 | 2 | 7  | 8  | 7 |
| 3 | 1 | 7  | 8  | 7 |
| 0 | 1 | 4  | 6  | 3 |
| 0 | 0 | 7  | 4  | 7 |
| 1 | 1 | 3  | 2  | 0 |
| 0 | 0 | 3  | 2  | 0 |
| 0 | 0 | 3  | 2  | 0 |
| 0 | 0 | 3  | 2  | 0 |
| 3 | 1 | 4  | 8  | 4 |
| 1 | 1 | 0  | 0  | 0 |
| 1 | 0 | 2  | 8  | 0 |
| 2 | 0 | 8  | 8  | 8 |
| 0 | 1 | 8  | 2  | 7 |
| 1 | 0 | 5  | 8  | 5 |
| 0 | 2 | 10 | 3  | 6 |
| 1 | 1 | 4  | 7  | 2 |
| 3 | 0 | 8  | 8  | 8 |
| 0 | 1 | 4  | 8  | 3 |
| 3 | 2 | 5  | 8  | 5 |
| 0 | 0 | 0  | 6  | 0 |
| 1 | 0 | 3  | 10 | 3 |



|   |   |    |    |    |
|---|---|----|----|----|
| 0 | 0 | 3  | 2  | 0  |
| 0 | 1 | 0  | 10 | 0  |
| 0 | 2 | 0  | 0  | 0  |
| 0 | 0 | 3  | 2  | 0  |
| 0 | 2 | 9  | 3  | 8  |
| 1 | 2 | 19 | 3  | 18 |
| 0 | 0 | 0  | 2  | 0  |
| 2 | 0 | 3  | 16 | 2  |
| 3 | 0 | 3  | 17 | 2  |
| 2 | 0 | 3  | 17 | 0  |
| 2 | 1 | 0  | 17 | 0  |
| 0 | 0 | 3  | 6  | 0  |
| 0 | 3 | 4  | 12 | 0  |
| 0 | 0 | 3  | 10 | 3  |
| 2 | 0 | 5  | 8  | 5  |
| 1 | 0 | 3  | 7  | 3  |
| 1 | 1 | 12 | 2  | 12 |
| 0 | 1 | 10 | 2  | 9  |
| 0 | 0 | 9  | 0  | 9  |
| 2 | 0 | 4  | 8  | 4  |
| 1 | 0 | 4  | 14 | 4  |
| 1 | 0 | 2  | 14 | 2  |
| 3 | 2 | 6  | 12 | 3  |
| 3 | 2 | 6  | 13 | 3  |
| 0 | 1 | 9  | 2  | 8  |
| 0 | 0 | 3  | 6  | 0  |
| 0 | 0 | 2  | 8  | 0  |
| 1 | 0 | 2  | 8  | 0  |
| 1 | 2 | 19 | 3  | 18 |
| 1 | 0 | 8  | 8  | 8  |
| 0 | 1 | 3  | 8  | 0  |
| 1 | 0 | 6  | 8  | 5  |
| 0 | 0 | 6  | 8  | 5  |
| 1 | 0 | 5  | 8  | 5  |
| 0 | 0 | 5  | 8  | 5  |
| 0 | 0 | 0  | 6  | 0  |
| 0 | 1 | 3  | 9  | 0  |
| 1 | 1 | 0  | 7  | 0  |
| 0 | 0 | 3  | 6  | 0  |
| 0 | 0 | 0  | 6  | 0  |
| 0 | 1 | 3  | 4  | 0  |

|        |                                                                                     |         |        |          |
|--------|-------------------------------------------------------------------------------------|---------|--------|----------|
| 1      | 0                                                                                   | 2       | 8      | 2        |
| 2      | 2                                                                                   | 3       | 11     | 2        |
| 0      | 0                                                                                   | 2       | 6      | 0        |
| 1      | 1                                                                                   | 3       | 6      | 2        |
| 0      | 1                                                                                   | 2       | 10     | 0        |
| 0      | 1                                                                                   | 3       | 8      | 0        |
| 1      | 0                                                                                   | 3       | 7      | 0        |
| 2      | 1                                                                                   | 5       | 8      | 5        |
| 3      | 3                                                                                   | 5       | 11     | 5        |
| 1      | 0                                                                                   | 2       | 8      | 2        |
| 2      | 2                                                                                   | 3       | 11     | 2        |
| 1      | 0                                                                                   | 2       | 8      | 2        |
| 0      | 0                                                                                   | 2       | 16     | 2        |
| 2      | 2                                                                                   | 3       | 19     | 2        |
| 2      | 0                                                                                   | 2       | 8      | 2        |
| 1      | 2                                                                                   | 17      | 3      | 16       |
| 0      | 0                                                                                   | 3       | 2      | 0        |
| 0      | 0                                                                                   | 3       | 2      | 0        |
| 2      | 0                                                                                   | 12      | 8      | 12       |
| 1      | 2                                                                                   | 19      | 3      | 18       |
| 0      | 0                                                                                   | 2       | 8      | 0        |
| 0      | 0                                                                                   | 3       | 2      | 0        |
| 0      | 0                                                                                   | 3       | 6      | 3        |
| 1      | 1                                                                                   | 5       | 8      | 5        |
| 1      | 2                                                                                   | 0       | 6      | 0        |
| 1      | 0                                                                                   | 3       | 7      | 0        |
| 0      | 0                                                                                   | 0       | 6      | 0        |
| 0      | 0                                                                                   | 12      | 4      | 12       |
| 4      | 0                                                                                   | 4       | 20     | 4        |
| 3      | 0                                                                                   | 4       | 8      | 4        |
| 0      | 0                                                                                   | 7       | 2      | 7        |
| 0      | 0                                                                                   | 8       | 4      | 8        |
| 0      | 0                                                                                   | 3       | 2      | 0        |
| 0      | 1                                                                                   | 0       | 4      | 0        |
|        |                                                                                     |         |        |          |
|        | <b>Metabolites after MDS using ADMET (112) (used for HCA and Scaffold analysis)</b> |         |        |          |
| nHBDon | nHBAcc                                                                              | nAtomLC | nAtomP | nAtomLAC |
| 0      | 1                                                                                   | 3       | 8      | 0        |
| 1      | 1                                                                                   | 5       | 10     | 5        |
| 2      | 1                                                                                   | 3       | 8      | 3        |

|   |   |   |    |   |
|---|---|---|----|---|
| 2 | 1 | 5 | 10 | 5 |
| 0 | 1 | 3 | 8  | 0 |
| 2 | 0 | 2 | 17 | 0 |
| 1 | 1 | 5 | 13 | 5 |
| 2 | 1 | 8 | 11 | 8 |
| 1 | 0 | 2 | 17 | 0 |
| 0 | 4 | 8 | 11 | 8 |
| 2 | 3 | 5 | 10 | 5 |
| 2 | 2 | 5 | 12 | 5 |
| 1 | 0 | 5 | 12 | 5 |
| 2 | 1 | 5 | 8  | 5 |
| 2 | 0 | 5 | 15 | 5 |
| 0 | 1 | 2 | 8  | 0 |
| 1 | 3 | 5 | 13 | 5 |
| 2 | 1 | 5 | 8  | 5 |
| 1 | 1 | 5 | 8  | 5 |
| 1 | 1 | 5 | 10 | 5 |
| 1 | 1 | 5 | 8  | 5 |
| 2 | 1 | 5 | 8  | 5 |
| 2 | 2 | 5 | 10 | 5 |
| 2 | 1 | 5 | 8  | 5 |
| 2 | 2 | 4 | 8  | 3 |
| 1 | 1 | 5 | 12 | 5 |
| 2 | 1 | 8 | 11 | 8 |
| 2 | 1 | 2 | 8  | 0 |
| 2 | 2 | 8 | 11 | 8 |
| 1 | 1 | 5 | 8  | 5 |
| 2 | 1 | 2 | 8  | 0 |
| 1 | 2 | 4 | 10 | 4 |
| 2 | 1 | 3 | 8  | 3 |
| 3 | 2 | 3 | 8  | 3 |
| 1 | 2 | 5 | 10 | 5 |
| 0 | 1 | 5 | 12 | 5 |
| 2 | 2 | 5 | 13 | 5 |
| 2 | 2 | 5 | 13 | 5 |
| 0 | 1 | 5 | 10 | 5 |
| 2 | 2 | 5 | 11 | 5 |
| 1 | 0 | 3 | 8  | 3 |
| 2 | 0 | 5 | 8  | 5 |
| 1 | 0 | 5 | 8  | 5 |
| 2 | 0 | 3 | 8  | 3 |

|   |   |   |    |   |
|---|---|---|----|---|
| 2 | 0 | 3 | 8  | 3 |
| 3 | 3 | 5 | 11 | 5 |
| 2 | 1 | 5 | 8  | 5 |
| 1 | 0 | 5 | 14 | 5 |
| 2 | 1 | 3 | 8  | 3 |
| 2 | 0 | 5 | 16 | 5 |
| 2 | 0 | 3 | 16 | 3 |
| 0 | 0 | 5 | 14 | 5 |
| 1 | 0 | 5 | 14 | 5 |
| 1 | 0 | 2 | 14 | 2 |
| 1 | 0 | 4 | 14 | 4 |
| 1 | 0 | 0 | 14 | 0 |
| 1 | 0 | 5 | 10 | 5 |
| 1 | 0 | 0 | 8  | 0 |
| 2 | 2 | 3 | 11 | 0 |
| 0 | 0 | 5 | 16 | 5 |
| 1 | 1 | 2 | 8  | 0 |
| 2 | 2 | 3 | 9  | 3 |
| 1 | 0 | 3 | 14 | 3 |
| 1 | 2 | 4 | 11 | 0 |
| 2 | 3 | 6 | 10 | 5 |
| 1 | 3 | 5 | 10 | 5 |
| 0 | 1 | 5 | 12 | 5 |
| 1 | 0 | 9 | 10 | 9 |
| 0 | 1 | 3 | 8  | 0 |
| 2 | 2 | 3 | 11 | 0 |
| 1 | 0 | 8 | 8  | 8 |
| 1 | 0 | 5 | 16 | 5 |
| 1 | 0 | 3 | 8  | 3 |
| 1 | 0 | 5 | 8  | 5 |
| 1 | 0 | 5 | 8  | 5 |
| 2 | 2 | 5 | 11 | 5 |
| 1 | 0 | 3 | 8  | 3 |
| 2 | 2 | 4 | 11 | 4 |
| 1 | 0 | 4 | 8  | 4 |
| 1 | 0 | 4 | 8  | 4 |
| 1 | 0 | 0 | 8  | 0 |
| 2 | 2 | 5 | 11 | 5 |
| 2 | 2 | 5 | 11 | 5 |
| 2 | 2 | 4 | 11 | 4 |
| 3 | 2 | 7 | 8  | 7 |

|       |                                                             |             |            |             |
|-------|-------------------------------------------------------------|-------------|------------|-------------|
| 3     | 2                                                           | 7           | 8          | 7           |
| 3     | 1                                                           | 7           | 8          | 7           |
| 2     | 0                                                           | 8           | 8          | 8           |
| 1     | 0                                                           | 5           | 8          | 5           |
| 3     | 0                                                           | 8           | 8          | 8           |
| 3     | 2                                                           | 5           | 8          | 5           |
| 2     | 0                                                           | 3           | 16         | 2           |
| 3     | 0                                                           | 3           | 17         | 2           |
| 2     | 0                                                           | 3           | 17         | 0           |
| 2     | 1                                                           | 0           | 17         | 0           |
| 2     | 0                                                           | 4           | 8          | 4           |
| 1     | 0                                                           | 4           | 14         | 4           |
| 1     | 0                                                           | 2           | 14         | 2           |
| 1     | 0                                                           | 6           | 8          | 5           |
| 1     | 0                                                           | 5           | 8          | 5           |
| 1     | 0                                                           | 2           | 8          | 2           |
| 2     | 2                                                           | 3           | 11         | 2           |
| 1     | 0                                                           | 3           | 7          | 0           |
| 3     | 3                                                           | 5           | 11         | 5           |
| 1     | 0                                                           | 2           | 8          | 2           |
| 2     | 2                                                           | 3           | 11         | 2           |
| 1     | 0                                                           | 2           | 8          | 2           |
| 2     | 2                                                           | 3           | 19         | 2           |
| 2     | 0                                                           | 2           | 8          | 2           |
| 1     | 1                                                           | 5           | 8          | 5           |
| 1     | 2                                                           | 0           | 6          | 0           |
| 1     | 0                                                           | 3           | 7          | 0           |
|       |                                                             |             |            |             |
|       | <b>468 Metabolites and positive &amp; negative controls</b> |             |            |             |
| MLogP | nRotB                                                       | nSmallRings | nAromRings | nRingBlocks |
| 3.77  | 6                                                           | 7           | 1          | 1           |
| 3.11  | 6                                                           | 2           | 1          | 2           |
| 3.44  | 7                                                           | 3           | 2          | 3           |
| 3.55  | 9                                                           | 3           | 2          | 3           |
| 3     | 5                                                           | 2           | 1          | 2           |
| 4.21  | 8                                                           | 5           | 4          | 4           |
| 3.66  | 8                                                           | 3           | 2          | 3           |
| 3.55  | 9                                                           | 3           | 2          | 3           |
| 2.89  | 8                                                           | 3           | 3          | 2           |
| 2.78  | 5                                                           | 4           | 1          | 2           |

|      |    |   |   |   |
|------|----|---|---|---|
| 3    | 1  | 5 | 1 | 1 |
| 2.89 | 4  | 5 | 1 | 1 |
| 3    | 0  | 5 | 1 | 1 |
| 3.77 | 7  | 4 | 2 | 4 |
| 3.44 | 9  | 2 | 2 | 2 |
| 2.89 | 6  | 2 | 2 | 2 |
| 4.1  | 7  | 4 | 3 | 4 |
| 1.57 | 0  | 0 | 0 | 0 |
| 2.78 | 5  | 2 | 2 | 2 |
| 3.11 | 10 | 3 | 3 | 2 |
| 3.66 | 4  | 7 | 1 | 1 |
| 3.55 | 7  | 3 | 2 | 3 |
| 3.11 | 4  | 5 | 1 | 1 |
| 3    | 1  | 5 | 1 | 1 |
| 2.89 | 0  | 5 | 1 | 1 |
| 3.55 | 7  | 2 | 2 | 2 |
| 2.78 | 3  | 2 | 1 | 2 |
| 3.77 | 7  | 4 | 2 | 4 |
| 2.78 | 4  | 2 | 1 | 2 |
| 2.89 | 0  | 5 | 1 | 1 |
| 2.78 | 0  | 5 | 1 | 1 |
| 2.89 | 1  | 5 | 1 | 1 |
| 2.78 | 0  | 5 | 1 | 1 |
| 2.78 | 6  | 2 | 1 | 2 |
| 3.66 | 9  | 2 | 2 | 2 |
| 2.67 | 5  | 2 | 1 | 2 |
| 3    | 5  | 2 | 1 | 2 |
| 2.89 | 4  | 2 | 1 | 2 |
| 3.55 | 9  | 2 | 2 | 2 |
| 3.66 | 7  | 3 | 2 | 3 |
| 3    | 6  | 2 | 1 | 2 |
| 3.66 | 3  | 4 | 2 | 2 |
| 3.88 | 3  | 5 | 2 | 2 |
| 3.55 | 8  | 3 | 2 | 3 |
| 3.55 | 9  | 3 | 2 | 3 |
| 3.88 | 7  | 4 | 2 | 4 |
| 3    | 4  | 2 | 1 | 2 |
| 2.89 | 4  | 2 | 1 | 2 |
| 3.22 | 1  | 4 | 1 | 1 |
| 2.89 | 9  | 2 | 1 | 2 |
| 2.89 | 10 | 2 | 1 | 2 |

|      |    |   |   |   |
|------|----|---|---|---|
| 3.33 | 9  | 3 | 2 | 3 |
| 3.11 | 3  | 5 | 1 | 1 |
| 3.11 | 2  | 5 | 1 | 1 |
| 3.22 | 7  | 3 | 2 | 3 |
| 3    | 5  | 2 | 1 | 2 |
| 3    | 4  | 2 | 1 | 2 |
| 2.67 | 4  | 2 | 1 | 2 |
| 3.88 | 5  | 4 | 2 | 4 |
| 3.22 | 4  | 4 | 2 | 1 |
| 2.34 | 3  | 2 | 1 | 1 |
| 2.89 | 1  | 3 | 3 | 2 |
| 2.23 | 5  | 1 | 1 | 1 |
| 3.55 | 17 | 0 | 0 | 0 |
| 3.55 | 18 | 0 | 0 | 0 |
| 3.55 | 18 | 0 | 0 | 0 |
| 3.77 | 19 | 0 | 0 | 0 |
| 3.66 | 18 | 0 | 0 | 0 |
| 4.1  | 18 | 1 | 1 | 1 |
| 3.88 | 19 | 1 | 1 | 1 |
| 3.22 | 15 | 0 | 0 | 0 |
| 3.55 | 17 | 0 | 0 | 0 |
| 2.34 | 1  | 2 | 1 | 2 |
| 1.46 | 0  | 0 | 0 | 0 |
| 1.9  | 5  | 2 | 0 | 1 |
| 1.79 | 2  | 0 | 0 | 0 |
| 1.46 | 1  | 1 | 0 | 1 |
| 1.46 | 4  | 0 | 0 | 0 |
| 1.57 | 3  | 1 | 1 | 1 |
| 1.79 | 3  | 0 | 0 | 0 |
| 1.46 | 1  | 0 | 0 | 0 |
| 1.79 | 3  | 0 | 0 | 0 |
| 1.68 | 5  | 0 | 0 | 0 |
| 1.57 | 4  | 0 | 0 | 0 |
| 2.12 | 3  | 1 | 1 | 1 |
| 1.46 | 1  | 0 | 0 | 0 |
| 2.23 | 5  | 3 | 3 | 1 |
| 2.12 | 4  | 2 | 2 | 2 |
| 2.23 | 3  | 2 | 2 | 1 |
| 2.01 | 3  | 1 | 1 | 1 |
| 1.68 | 2  | 0 | 0 | 0 |
| 3.55 | 4  | 3 | 1 | 1 |

|      |   |   |   |   |
|------|---|---|---|---|
| 1.46 | 0 | 0 | 0 | 0 |
| 2.56 | 0 | 1 | 1 | 1 |
| 2.56 | 2 | 1 | 1 | 1 |
| 1.13 | 0 | 1 | 1 | 1 |
| 1.9  | 0 | 1 | 1 | 1 |
| 2.56 | 2 | 1 | 1 | 1 |
| 1.79 | 2 | 0 | 0 | 0 |
| 2.01 | 5 | 0 | 0 | 0 |
| 2.01 | 4 | 0 | 0 | 0 |
| 2.56 | 9 | 0 | 0 | 0 |
| 2.45 | 3 | 0 | 0 | 0 |
| 2.34 | 2 | 0 | 0 | 0 |
| 2.34 | 0 | 1 | 1 | 1 |
| 2.89 | 2 | 1 | 1 | 1 |
| 2.12 | 2 | 1 | 1 | 1 |
| 1.9  | 0 | 1 | 1 | 1 |
| 1.79 | 1 | 0 | 0 | 0 |
| 1.9  | 5 | 0 | 0 | 0 |
| 2.12 | 1 | 1 | 1 | 1 |
| 2.56 | 1 | 1 | 1 | 1 |
| 1.68 | 3 | 0 | 0 | 0 |
| 2.23 | 5 | 0 | 0 | 0 |
| 2.45 | 1 | 1 | 1 | 1 |
| 3.66 | 5 | 3 | 1 | 1 |
| 3.44 | 9 | 1 | 0 | 1 |
| 2.12 | 4 | 0 | 0 | 0 |
| 2.12 | 1 | 1 | 1 | 1 |
| 2.12 | 1 | 1 | 1 | 1 |
| 1.68 | 0 | 1 | 0 | 1 |
| 2.67 | 0 | 2 | 2 | 1 |
| 1.68 | 0 | 1 | 1 | 1 |
| 1.79 | 0 | 0 | 0 | 0 |
| 2.12 | 2 | 0 | 0 | 0 |
| 1.46 | 1 | 0 | 0 | 0 |
| 2.12 | 3 | 1 | 1 | 1 |
| 2.34 | 4 | 1 | 1 | 1 |
| 2.23 | 3 | 1 | 1 | 1 |
| 3.22 | 3 | 3 | 1 | 1 |
| 2.34 | 0 | 1 | 1 | 1 |
| 2.45 | 3 | 0 | 0 | 0 |
| 2.45 | 1 | 1 | 1 | 1 |



|      |    |   |   |   |
|------|----|---|---|---|
| 2.56 | 1  | 1 | 1 | 1 |
| 3.44 | 8  | 2 | 1 | 1 |
| 2.45 | 2  | 1 | 1 | 1 |
| 2.34 | 1  | 1 | 1 | 1 |
| 2.34 | 4  | 0 | 0 | 0 |
| 2.01 | 0  | 1 | 0 | 1 |
| 2.12 | 2  | 0 | 0 | 0 |
| 2.45 | 4  | 1 | 1 | 1 |
| 1.9  | 2  | 0 | 0 | 0 |
| 2.78 | 3  | 3 | 2 | 1 |
| 2.67 | 2  | 3 | 3 | 1 |
| 3.55 | 9  | 2 | 1 | 1 |
| 3.55 | 11 | 1 | 1 | 1 |
| 2.56 | 0  | 2 | 0 | 1 |
| 2.23 | 4  | 1 | 1 | 1 |
| 2.89 | 4  | 3 | 2 | 1 |
| 2.23 | 1  | 2 | 2 | 1 |
| 2.67 | 7  | 0 | 0 | 0 |
| 1.79 | 0  | 1 | 1 | 1 |
| 2.12 | 1  | 1 | 1 | 1 |
| 2.34 | 2  | 1 | 1 | 1 |
| 1.79 | 0  | 1 | 1 | 1 |
| 4.54 | 8  | 4 | 1 | 2 |
| 4.54 | 8  | 4 | 2 | 2 |
| 3.55 | 11 | 1 | 0 | 1 |
| 3.55 | 11 | 1 | 1 | 1 |
| 2.23 | 1  | 1 | 1 | 1 |
| 3.55 | 11 | 1 | 1 | 1 |
| 3.11 | 5  | 2 | 2 | 2 |
| 2.56 | 0  | 2 | 1 | 1 |
| 2.12 | 2  | 1 | 0 | 1 |
| 3.22 | 10 | 2 | 1 | 2 |
| 3.22 | 10 | 2 | 1 | 2 |
| 3.22 | 7  | 2 | 1 | 1 |
| 3.11 | 7  | 2 | 1 | 1 |
| 3.66 | 1  | 5 | 3 | 2 |
| 3.11 | 3  | 3 | 3 | 2 |
| 3.55 | 6  | 3 | 1 | 1 |
| 3.55 | 4  | 3 | 1 | 1 |
| 3.44 | 7  | 2 | 1 | 1 |
| 3.44 | 4  | 3 | 2 | 1 |

|      |    |   |   |   |
|------|----|---|---|---|
| 2.89 | 2  | 3 | 1 | 1 |
| 3.33 | 8  | 3 | 2 | 1 |
| 3.33 | 4  | 3 | 1 | 1 |
| 3.33 | 5  | 3 | 2 | 1 |
| 3.44 | 4  | 3 | 2 | 1 |
| 3.44 | 4  | 3 | 1 | 1 |
| 3.44 | 4  | 3 | 1 | 1 |
| 3.44 | 4  | 4 | 1 | 1 |
| 2.78 | 4  | 3 | 1 | 1 |
| 3.44 | 4  | 4 | 1 | 1 |
| 3.44 | 4  | 3 | 1 | 1 |
| 3.55 | 6  | 3 | 1 | 1 |
| 3.44 | 4  | 3 | 1 | 1 |
| 3.44 | 4  | 3 | 1 | 1 |
| 3.44 | 4  | 3 | 1 | 1 |
| 3.44 | 8  | 3 | 1 | 1 |
| 3.44 | 8  | 3 | 1 | 1 |
| 3.55 | 9  | 1 | 1 | 1 |
| 1.57 | 0  | 0 | 0 | 0 |
| 1.46 | 0  | 0 | 0 | 0 |
| 1.46 | 0  | 0 | 0 | 0 |
| 1.68 | 0  | 0 | 0 | 0 |
| 3.55 | 11 | 1 | 1 | 1 |
| 3.55 | 11 | 1 | 0 | 1 |
| 1.68 | 1  | 0 | 0 | 0 |
| 2.23 | 1  | 1 | 1 | 1 |
| 3.11 | 0  | 3 | 0 | 1 |
| 3    | 4  | 1 | 0 | 1 |
| 3.11 | 1  | 2 | 0 | 1 |
| 3.11 | 1  | 2 | 0 | 1 |
| 5.09 | 8  | 5 | 1 | 2 |
| 2.78 | 1  | 3 | 1 | 1 |
| 3.11 | 0  | 4 | 0 | 1 |
| 3.11 | 3  | 3 | 0 | 1 |
| 3.11 | 1  | 5 | 0 | 1 |
| 3.11 | 1  | 3 | 0 | 1 |
| 3    | 1  | 2 | 0 | 1 |
| 3.11 | 1  | 2 | 0 | 1 |
| 3.11 | 0  | 3 | 0 | 1 |
| 3.11 | 0  | 0 | 0 | 1 |
| 2.78 | 2  | 1 | 0 | 1 |

|      |    |   |   |   |
|------|----|---|---|---|
| 3.22 | 13 | 0 | 0 | 0 |
| 3.11 | 0  | 5 | 0 | 1 |
| 2.45 | 2  | 1 | 1 | 1 |
| 2.56 | 1  | 1 | 0 | 1 |
| 2.56 | 0  | 3 | 0 | 1 |
| 3.11 | 1  | 2 | 0 | 1 |
| 4.54 | 8  | 4 | 1 | 2 |
| 2.56 | 1  | 1 | 0 | 1 |
| 2.45 | 1  | 1 | 0 | 1 |
| 2.56 | 1  | 2 | 0 | 1 |
| 3.11 | 3  | 3 | 0 | 1 |
| 3.11 | 1  | 5 | 0 | 1 |
| 3.22 | 8  | 2 | 2 | 2 |
| 3.77 | 9  | 2 | 2 | 2 |
| 3.33 | 7  | 2 | 2 | 2 |
| 3.88 | 10 | 2 | 2 | 2 |
| 2.45 | 2  | 1 | 1 | 1 |
| 3.44 | 6  | 3 | 1 | 1 |
| 3.22 | 6  | 1 | 0 | 1 |
| 3    | 4  | 2 | 1 | 1 |
| 3    | 1  | 4 | 1 | 1 |
| 2.56 | 1  | 3 | 3 | 2 |
| 3.22 | 4  | 2 | 2 | 2 |
| 3.33 | 4  | 2 | 2 | 2 |
| 3    | 5  | 2 | 2 | 2 |
| 3.11 | 5  | 2 | 2 | 2 |
| 3.11 | 0  | 3 | 0 | 1 |
| 3.11 | 0  | 3 | 0 | 1 |
| 2.12 | 1  | 1 | 1 | 1 |
| 2.12 | 0  | 1 | 1 | 1 |
| 2.78 | 2  | 2 | 2 | 2 |
| 3.22 | 5  | 2 | 2 | 2 |
| 2.23 | 3  | 1 | 1 | 1 |
| 2.12 | 1  | 1 | 1 | 1 |
| 2.12 | 3  | 1 | 1 | 1 |
| 2.23 | 1  | 1 | 1 | 1 |
| 2.78 | 1  | 3 | 1 | 1 |
| 3    | 0  | 2 | 0 | 1 |
| 3.11 | 0  | 1 | 0 | 1 |
| 3.11 | 0  | 4 | 0 | 1 |
| 3.11 | 3  | 1 | 0 | 1 |

|      |    |   |   |   |
|------|----|---|---|---|
| 3    | 1  | 2 | 0 | 1 |
| 2.45 | 0  | 3 | 0 | 1 |
| 4.43 | 7  | 6 | 1 | 2 |
| 2.12 | 3  | 1 | 1 | 1 |
| 2.89 | 2  | 1 | 0 | 1 |
| 2.56 | 1  | 1 | 0 | 1 |
| 2.56 | 0  | 3 | 0 | 1 |
| 3.11 | 1  | 2 | 0 | 1 |
| 6.3  | 25 | 5 | 0 | 2 |
| 1.68 | 2  | 1 | 1 | 1 |
| 3.11 | 5  | 2 | 1 | 1 |
| 3.11 | 4  | 3 | 1 | 1 |
| 3.22 | 3  | 3 | 1 | 1 |
| 3.22 | 2  | 3 | 1 | 1 |
| 2.45 | 0  | 3 | 0 | 1 |
| 5.09 | 8  | 5 | 1 | 2 |
| 1.9  | 1  | 0 | 0 | 0 |
| 1.79 | 4  | 0 | 0 | 0 |
| 5.2  | 14 | 3 | 1 | 2 |
| 3.11 | 0  | 3 | 0 | 1 |
| 2.56 | 0  | 3 | 0 | 1 |
| 3.22 | 7  | 2 | 1 | 1 |
| 3.44 | 4  | 2 | 1 | 1 |
| 3.55 | 7  | 2 | 1 | 1 |
| 3.44 | 8  | 2 | 1 | 1 |
| 3.33 | 5  | 2 | 1 | 1 |
| 3.22 | 6  | 2 | 1 | 1 |
| 3.55 | 4  | 4 | 1 | 1 |
| 3.44 | 7  | 3 | 2 | 1 |
| 3.55 | 4  | 4 | 1 | 1 |
| 3.44 | 5  | 4 | 1 | 1 |
| 3.33 | 2  | 4 | 1 | 1 |
| 3.55 | 6  | 2 | 1 | 2 |
| 3.44 | 7  | 2 | 1 | 2 |
| 3.66 | 7  | 2 | 1 | 2 |
| 3.11 | 2  | 2 | 1 | 2 |
| 3.33 | 4  | 2 | 1 | 2 |
| 3.22 | 5  | 2 | 1 | 2 |
| 3.33 | 6  | 3 | 1 | 1 |
| 3.33 | 6  | 3 | 1 | 1 |
| 3.44 | 5  | 3 | 1 | 1 |

|      |    |   |   |   |
|------|----|---|---|---|
| 3.11 | 4  | 3 | 3 | 2 |
| 3.55 | 5  | 3 | 3 | 1 |
| 3.55 | 9  | 1 | 1 | 1 |
| 3.55 | 11 | 1 | 1 | 1 |
| 3.44 | 10 | 1 | 1 | 1 |
| 3.66 | 10 | 1 | 1 | 1 |
| 3.55 | 9  | 1 | 0 | 1 |
| 3.33 | 7  | 1 | 1 | 1 |
| 3.22 | 8  | 1 | 1 | 1 |
| 3.22 | 3  | 3 | 1 | 1 |
| 3.22 | 6  | 2 | 1 | 2 |
| 3.55 | 9  | 1 | 1 | 1 |
| 3.44 | 10 | 1 | 1 | 1 |
| 3.55 | 6  | 2 | 2 | 2 |
| 3.33 | 4  | 2 | 2 | 2 |
| 3.66 | 5  | 3 | 2 | 1 |
| 3.55 | 4  | 3 | 2 | 1 |
| 3.22 | 1  | 3 | 2 | 1 |
| 3.44 | 3  | 3 | 2 | 1 |
| 3.44 | 5  | 3 | 2 | 1 |
| 3.11 | 0  | 3 | 2 | 1 |
| 3.11 | 3  | 2 | 1 | 1 |
| 3    | 4  | 2 | 1 | 1 |
| 3.11 | 0  | 4 | 1 | 1 |
| 3.11 | 0  | 4 | 1 | 1 |
| 3    | 1  | 4 | 1 | 1 |
| 3.55 | 4  | 4 | 3 | 1 |
| 3.33 | 4  | 3 | 1 | 1 |
| 3.11 | 6  | 1 | 0 | 1 |
| 4.1  | 11 | 5 | 5 | 4 |
| 4.1  | 11 | 5 | 4 | 4 |
| 4.21 | 12 | 5 | 4 | 4 |
| 4.32 | 13 | 5 | 4 | 4 |
| 2.78 | 1  | 3 | 1 | 1 |
| 3.33 | 4  | 3 | 1 | 1 |
| 3.22 | 2  | 3 | 1 | 1 |
| 3.33 | 2  | 3 | 2 | 1 |
| 3.66 | 7  | 3 | 3 | 2 |
| 3.11 | 4  | 3 | 3 | 2 |
| 3.66 | 7  | 3 | 3 | 2 |
| 2.34 | 3  | 2 | 1 | 1 |

|      |    |   |   |   |
|------|----|---|---|---|
| 3.33 | 10 | 1 | 1 | 1 |
| 2.45 | 1  | 1 | 1 | 1 |
| 2.45 | 1  | 1 | 0 | 1 |
| 5.42 | 14 | 5 | 2 | 3 |
| 3.11 | 2  | 4 | 0 | 1 |
| 3.11 | 14 | 0 | 0 | 0 |
| 3.33 | 3  | 3 | 2 | 2 |
| 2.89 | 4  | 2 | 1 | 1 |
| 2.56 | 2  | 3 | 3 | 2 |
| 2.45 | 0  | 3 | 0 | 1 |
| 3.11 | 7  | 0 | 0 | 0 |
| 3.11 | 3  | 1 | 0 | 1 |
| 2.56 | 3  | 0 | 0 | 0 |
| 2.56 | 1  | 2 | 0 | 1 |
| 2.56 | 7  | 0 | 0 | 0 |
| 2.45 | 7  | 0 | 0 | 0 |
| 3.22 | 8  | 2 | 1 | 1 |
| 3.22 | 8  | 2 | 1 | 1 |
| 3.44 | 4  | 2 | 1 | 1 |
| 3.66 | 6  | 2 | 1 | 1 |
| 2.45 | 1  | 1 | 1 | 1 |
| 2.45 | 2  | 1 | 1 | 1 |
| 3.55 | 7  | 2 | 1 | 1 |
| 3    | 1  | 3 | 1 | 1 |
| 2.45 | 8  | 0 | 0 | 0 |
| 3.44 | 6  | 2 | 2 | 2 |
| 3.99 | 9  | 2 | 2 | 2 |
| 3.55 | 5  | 3 | 3 | 1 |
| 2.56 | 0  | 2 | 0 | 1 |
| 3.33 | 3  | 3 | 1 | 1 |
| 3.55 | 5  | 3 | 1 | 1 |
| 3.55 | 4  | 3 | 1 | 1 |
| 3.44 | 5  | 3 | 1 | 1 |
| 3.33 | 2  | 3 | 1 | 1 |
| 3.44 | 4  | 3 | 1 | 1 |
| 3.55 | 3  | 3 | 1 | 1 |
| 3.44 | 3  | 3 | 1 | 1 |
| 3.11 | 0  | 3 | 1 | 1 |
| 3.44 | 5  | 3 | 1 | 1 |
| 3.44 | 5  | 3 | 1 | 1 |
| 3.33 | 4  | 3 | 1 | 1 |

|      |    |   |   |   |
|------|----|---|---|---|
| 3.11 | 1  | 2 | 0 | 1 |
| 3.22 | 6  | 2 | 2 | 2 |
| 3.33 | 5  | 2 | 2 | 2 |
| 3    | 8  | 1 | 1 | 1 |
| 3.66 | 4  | 4 | 2 | 2 |
| 3.66 | 6  | 3 | 2 | 2 |
| 3.66 | 1  | 6 | 2 | 2 |
| 3.66 | 1  | 5 | 2 | 2 |
| 1.9  | 2  | 0 | 0 | 0 |
| 2.78 | 10 | 1 | 1 | 1 |
| 2.34 | 6  | 1 | 1 | 1 |
| 2.56 | 4  | 1 | 1 | 1 |
| 1.35 | 0  | 0 | 0 | 0 |
| 1.57 | 0  | 0 | 0 | 0 |
| 2.78 | 9  | 0 | 0 | 0 |
| 3.22 | 3  | 3 | 2 | 1 |
| 2.56 | 0  | 1 | 1 | 1 |
| 3.11 | 8  | 2 | 1 | 2 |
| 4.54 | 7  | 6 | 1 | 2 |
| 2.45 | 3  | 1 | 1 | 1 |
| 1.68 | 2  | 0 | 0 | 0 |
| 1.46 | 1  | 0 | 0 | 0 |
| 1.57 | 0  | 1 | 0 | 1 |
| 1.57 | 0  | 1 | 0 | 1 |
| 5.09 | 13 | 3 | 1 | 2 |
| 2.34 | 3  | 1 | 1 | 1 |
| 2.45 | 5  | 1 | 1 | 1 |
| 2.45 | 0  | 3 | 0 | 1 |
| 2.45 | 0  | 3 | 0 | 1 |
| 3.44 | 5  | 3 | 1 | 1 |
| 3.44 | 4  | 3 | 1 | 1 |
| 3.55 | 6  | 2 | 1 | 2 |
| 1.35 | 0  | 0 | 0 | 0 |
| 1.79 | 1  | 1 | 1 | 1 |
| 2.89 | 5  | 2 | 2 | 2 |
| 3.11 | 4  | 1 | 0 | 1 |
| 3    | 1  | 2 | 0 | 1 |
| 3.11 | 1  | 2 | 0 | 1 |
| 1.9  | 1  | 1 | 0 | 1 |
| 3.11 | 1  | 2 | 0 | 1 |
| 2.56 | 1  | 1 | 0 | 1 |

|      |    |   |   |   |
|------|----|---|---|---|
| 3.22 | 6  | 2 | 2 | 2 |
| 3    | 0  | 3 | 0 | 1 |
| 4.32 | 14 | 5 | 4 | 4 |
| 2.01 | 1  | 1 | 1 | 1 |
| 3.88 | 8  | 2 | 2 | 2 |
| 2.12 | 5  | 0 | 0 | 0 |
| 3.22 | 13 | 0 | 0 | 0 |
| 3.55 | 4  | 3 | 1 | 1 |
| 2.01 | 4  | 0 | 0 | 0 |
| 2.01 | 5  | 0 | 0 | 0 |
| 2.23 | 7  | 0 | 0 | 0 |
| 3.22 | 5  | 2 | 2 | 2 |
| 2.34 | 3  | 1 | 1 | 1 |
| 3.77 | 8  | 2 | 2 | 2 |
| 2.45 | 4  | 0 | 0 | 0 |
| 1.9  | 2  | 0 | 0 | 0 |
| 2.56 | 2  | 3 | 0 | 1 |
|      |    |   |   |   |
| 2.45 | 4  | 3 | 0 | 1 |
| 1.9  | 0  | 0 | 0 | 0 |
| 1.79 | 1  | 0 | 0 | 0 |
| 2.45 | 2  | 1 | 1 | 1 |
| 3.44 | 4  | 3 | 1 | 1 |
| 1.46 | 0  | 0 | 0 | 0 |
| 2.56 | 0  | 1 | 1 | 1 |
| 2.34 | 2  | 1 | 1 | 1 |
| 2.56 | 1  | 1 | 0 | 1 |
| 2.01 | 1  | 0 | 0 | 0 |
| 2.34 | 0  | 2 | 2 | 1 |
| 2.45 | 1  | 3 | 3 | 2 |
| 2.34 | 1  | 3 | 0 | 2 |
| 2.56 | 1  | 1 | 0 | 1 |
| 2.45 | 4  | 0 | 0 | 0 |
| 2.56 | 6  | 0 | 0 | 0 |
| 3.22 | 14 | 0 | 0 | 0 |
| 3.11 | 0  | 4 | 0 | 1 |
| 2.45 | 1  | 3 | 3 | 2 |
| 3.88 | 4  | 3 | 2 | 3 |
| 3.77 | 4  | 3 | 2 | 3 |
| 3.77 | 3  | 4 | 3 | 3 |
| 3.66 | 1  | 5 | 3 | 2 |



|      |    |   |   |   |
|------|----|---|---|---|
| 2.56 | 1  | 1 | 1 | 1 |
| 1.79 | 1  | 0 | 0 | 0 |
| 2.01 | 4  | 0 | 0 | 0 |
| 1.57 | 1  | 0 | 0 | 0 |
| 2.12 | 4  | 1 | 1 | 1 |
| 2.01 | 2  | 1 | 1 | 1 |
| 2.12 | 2  | 1 | 1 | 1 |
| 1.35 | 1  | 0 | 0 | 0 |
| 2.23 | 2  | 0 | 0 | 0 |
| 2.12 | 6  | 0 | 0 | 0 |
| 1.35 | 0  | 0 | 0 | 0 |
| 2.45 | 3  | 1 | 1 | 1 |
| 2.01 | 2  | 1 | 1 | 1 |
| 1.9  | 4  | 0 | 0 | 0 |
| 1.35 | 0  | 0 | 0 | 0 |
| 5.75 | 10 | 6 | 2 | 2 |
| 2.23 | 3  | 0 | 0 | 0 |
| 2.45 | 1  | 1 | 1 | 1 |
| 2.56 | 4  | 0 | 0 | 0 |
| 2.45 | 4  | 0 | 0 | 0 |
| 3    | 7  | 0 | 0 | 0 |
| 1.79 | 1  | 1 | 1 | 1 |
| 2.34 | 7  | 0 | 0 | 0 |
| 2.45 | 6  | 0 | 0 | 0 |
| 3.44 | 5  | 2 | 1 | 2 |
| 3.44 | 3  | 3 | 2 | 1 |
| 3.22 | 1  | 3 | 2 | 1 |
| 2.89 | 6  | 2 | 2 | 2 |
| 2.89 | 7  | 2 | 2 | 2 |
| 2.23 | 6  | 0 | 0 | 0 |
| 2.56 | 1  | 1 | 1 | 1 |
| 2.12 | 2  | 1 | 1 | 1 |
| 2.01 | 1  | 1 | 1 | 1 |
| 3.22 | 15 | 0 | 0 | 0 |
| 3.66 | 10 | 1 | 1 | 1 |
| 2.34 | 1  | 1 | 1 | 1 |
| 4.1  | 11 | 2 | 1 | 2 |
| 4.21 | 9  | 3 | 1 | 1 |
| 3.88 | 9  | 2 | 1 | 2 |
| 3.99 | 7  | 3 | 1 | 1 |
| 2.56 | 3  | 4 | 3 | 3 |

|      |    |   |   |   |
|------|----|---|---|---|
| 2.34 | 0  | 1 | 1 | 1 |
| 2.23 | 2  | 1 | 1 | 1 |
| 2.12 | 0  | 1 | 1 | 1 |
| 2.56 | 1  | 1 | 1 | 1 |
| 3.11 | 12 | 0 | 0 | 0 |
| 2.67 | 0  | 1 | 1 | 1 |
| 1.9  | 3  | 0 | 0 | 0 |
| 2.45 | 2  | 1 | 0 | 1 |
| 3.88 | 3  | 4 | 2 | 2 |
| 3.77 | 4  | 4 | 2 | 2 |
| 2.45 | 1  | 1 | 1 | 1 |
| 2.01 | 0  | 1 | 1 | 1 |
| 2.23 | 2  | 1 | 1 | 1 |
| 1.9  | 0  | 1 | 0 | 1 |
| 2.01 | 1  | 2 | 1 | 1 |
| 2.34 | 1  | 1 | 1 | 1 |
| 1.68 | 1  | 0 | 0 | 0 |
| 2.67 | 2  | 1 | 1 | 1 |
| 1.79 | 4  | 0 | 0 | 0 |
| 1.68 | 1  | 0 | 0 | 0 |
| 1.57 | 1  | 0 | 0 | 0 |
| 2.45 | 1  | 1 | 1 | 1 |
| 2.34 | 0  | 1 | 1 | 1 |
| 2.34 | 1  | 3 | 3 | 2 |
| 3.44 | 9  | 2 | 1 | 2 |
| 3.33 | 10 | 2 | 1 | 2 |
| 3.33 | 3  | 3 | 2 | 2 |
| 3.22 | 4  | 3 | 2 | 2 |
| 3.33 | 3  | 4 | 2 | 2 |
| 3.33 | 3  | 4 | 2 | 2 |
| 3.11 | 3  | 4 | 2 | 2 |
| 3.22 | 3  | 3 | 2 | 2 |
| 3.55 | 4  | 4 | 1 | 1 |
| 3    | 11 | 0 | 0 | 0 |
| 2.56 | 1  | 2 | 0 | 1 |
| 2.01 | 1  | 1 | 1 | 1 |
| 3.11 | 1  | 5 | 0 | 1 |
| 4.1  | 12 | 1 | 1 | 1 |
| 3.22 | 12 | 0 | 0 | 0 |
| 2.34 | 1  | 1 | 1 | 1 |
| 1.79 | 0  | 0 | 0 | 0 |

|       |                                                                                     |             |            |             |
|-------|-------------------------------------------------------------------------------------|-------------|------------|-------------|
| 2.56  | 0                                                                                   | 1           | 0          | 1           |
| 2.56  | 1                                                                                   | 1           | 1          | 1           |
| 3.44  | 4                                                                                   | 4           | 1          | 1           |
| 2.67  | 1                                                                                   | 3           | 1          | 2           |
| 2.45  | 1                                                                                   | 1           | 1          | 1           |
| 2.23  | 0                                                                                   | 1           | 1          | 1           |
| 3.11  | 6                                                                                   | 0           | 0          | 0           |
| 3.11  | 4                                                                                   | 2           | 2          | 2           |
| 3.22  | 5                                                                                   | 2           | 2          | 2           |
| 3.11  | 3                                                                                   | 1           | 0          | 1           |
| 2.56  | 3                                                                                   | 0           | 0          | 0           |
| 2.89  | 10                                                                                  | 0           | 0          | 0           |
| 2.12  | 2                                                                                   | 1           | 1          | 1           |
| 2.67  | 8                                                                                   | 0           | 0          | 0           |
| 3.11  | 1                                                                                   | 2           | 0          | 1           |
| 2.45  | 0                                                                                   | 3           | 0          | 1           |
| 2.67  | 3                                                                                   | 4           | 3          | 3           |
| 2.78  | 6                                                                                   | 2           | 2          | 2           |
|       |                                                                                     |             |            |             |
|       | <b>Metabolites from Machine Learning Methods<br/>(330) (used for MDS using CDK)</b> |             |            |             |
| MLogP | nRotB                                                                               | nSmallRings | nAromRings | nRingBlocks |
| 2.56  | 0                                                                                   | 1           | 1          | 1           |
| 2.56  | 2                                                                                   | 1           | 1          | 1           |
| 1.9   | 0                                                                                   | 1           | 1          | 1           |
| 2.56  | 2                                                                                   | 1           | 1          | 1           |
| 2.45  | 3                                                                                   | 0           | 0          | 0           |
| 2.34  | 0                                                                                   | 1           | 1          | 1           |
| 2.89  | 2                                                                                   | 1           | 1          | 1           |
| 2.12  | 2                                                                                   | 1           | 1          | 1           |
| 2.12  | 1                                                                                   | 1           | 1          | 1           |
| 2.56  | 1                                                                                   | 1           | 1          | 1           |
| 2.45  | 1                                                                                   | 1           | 1          | 1           |
| 3.66  | 5                                                                                   | 3           | 1          | 1           |
| 3.44  | 9                                                                                   | 1           | 0          | 1           |
| 2.12  | 1                                                                                   | 1           | 1          | 1           |
| 2.12  | 1                                                                                   | 1           | 1          | 1           |
| 2.67  | 0                                                                                   | 2           | 2          | 1           |
| 2.12  | 3                                                                                   | 1           | 1          | 1           |
| 2.34  | 4                                                                                   | 1           | 1          | 1           |
| 2.23  | 3                                                                                   | 1           | 1          | 1           |

|      |    |   |   |   |
|------|----|---|---|---|
| 3.22 | 3  | 3 | 1 | 1 |
| 2.34 | 0  | 1 | 1 | 1 |
| 2.45 | 3  | 0 | 0 | 0 |
| 2.45 | 1  | 1 | 1 | 1 |
| 2.56 | 1  | 1 | 1 | 1 |
| 3.44 | 8  | 2 | 1 | 1 |
| 2.45 | 2  | 1 | 1 | 1 |
| 2.34 | 1  | 1 | 1 | 1 |
| 2.34 | 4  | 0 | 0 | 0 |
| 2.45 | 4  | 1 | 1 | 1 |
| 2.78 | 3  | 3 | 2 | 1 |
| 2.67 | 2  | 3 | 3 | 1 |
| 3.55 | 9  | 2 | 1 | 1 |
| 3.55 | 11 | 1 | 1 | 1 |
| 2.56 | 0  | 2 | 0 | 1 |
| 2.23 | 4  | 1 | 1 | 1 |
| 2.89 | 4  | 3 | 2 | 1 |
| 2.23 | 1  | 2 | 2 | 1 |
| 2.67 | 7  | 0 | 0 | 0 |
| 2.12 | 1  | 1 | 1 | 1 |
| 2.34 | 2  | 1 | 1 | 1 |
| 4.54 | 8  | 4 | 1 | 2 |
| 4.54 | 8  | 4 | 2 | 2 |
| 3.55 | 11 | 1 | 0 | 1 |
| 3.55 | 11 | 1 | 1 | 1 |
| 2.23 | 1  | 1 | 1 | 1 |
| 3.11 | 5  | 2 | 2 | 2 |
| 2.56 | 0  | 2 | 1 | 1 |
| 2.12 | 2  | 1 | 0 | 1 |
| 3.22 | 7  | 2 | 1 | 1 |
| 3.11 | 7  | 2 | 1 | 1 |
| 3.55 | 6  | 3 | 1 | 1 |
| 3.55 | 4  | 3 | 1 | 1 |
| 3.44 | 7  | 2 | 1 | 1 |
| 3.44 | 4  | 3 | 2 | 1 |
| 2.89 | 2  | 3 | 1 | 1 |
| 3.33 | 8  | 3 | 2 | 1 |
| 3.33 | 4  | 3 | 1 | 1 |
| 3.44 | 4  | 3 | 2 | 1 |
| 3.44 | 4  | 3 | 1 | 1 |
| 3.44 | 4  | 3 | 1 | 1 |

|      |    |   |   |   |
|------|----|---|---|---|
| 3.44 | 4  | 4 | 1 | 1 |
| 2.78 | 4  | 3 | 1 | 1 |
| 3.44 | 4  | 4 | 1 | 1 |
| 3.44 | 4  | 3 | 1 | 1 |
| 3.55 | 6  | 3 | 1 | 1 |
| 3.44 | 4  | 3 | 1 | 1 |
| 3.44 | 4  | 3 | 1 | 1 |
| 3.44 | 4  | 3 | 1 | 1 |
| 3.44 | 8  | 3 | 1 | 1 |
| 3.44 | 8  | 3 | 1 | 1 |
| 3.55 | 9  | 1 | 1 | 1 |
| 3.55 | 11 | 1 | 1 | 1 |
| 3.55 | 11 | 1 | 0 | 1 |
| 2.23 | 1  | 1 | 1 | 1 |
| 3.11 | 0  | 3 | 0 | 1 |
| 3    | 4  | 1 | 0 | 1 |
| 3.11 | 1  | 2 | 0 | 1 |
| 3.11 | 1  | 2 | 0 | 1 |
| 5.09 | 8  | 5 | 1 | 2 |
| 2.78 | 1  | 3 | 1 | 1 |
| 3.11 | 0  | 4 | 0 | 1 |
| 3.11 | 3  | 3 | 0 | 1 |
| 3.11 | 1  | 5 | 0 | 1 |
| 3.11 | 1  | 3 | 0 | 1 |
| 3    | 1  | 2 | 0 | 1 |
| 3.11 | 1  | 2 | 0 | 1 |
| 3.11 | 0  | 3 | 0 | 1 |
| 3.11 | 0  | 0 | 0 | 1 |
| 2.78 | 2  | 1 | 0 | 1 |
| 3.22 | 13 | 0 | 0 | 0 |
| 3.11 | 0  | 5 | 0 | 1 |
| 2.45 | 2  | 1 | 1 | 1 |
| 2.56 | 1  | 1 | 0 | 1 |
| 2.56 | 0  | 3 | 0 | 1 |
| 3.11 | 1  | 2 | 0 | 1 |
| 4.54 | 8  | 4 | 1 | 2 |
| 2.56 | 1  | 1 | 0 | 1 |
| 2.45 | 1  | 1 | 0 | 1 |
| 2.56 | 1  | 2 | 0 | 1 |
| 3.11 | 3  | 3 | 0 | 1 |
| 3.11 | 1  | 5 | 0 | 1 |

|      |    |   |   |   |
|------|----|---|---|---|
| 3.88 | 10 | 2 | 2 | 2 |
| 2.45 | 2  | 1 | 1 | 1 |
| 3.44 | 6  | 3 | 1 | 1 |
| 3.22 | 6  | 1 | 0 | 1 |
| 3.22 | 4  | 2 | 2 | 2 |
| 3.33 | 4  | 2 | 2 | 2 |
| 3.11 | 5  | 2 | 2 | 2 |
| 3.11 | 0  | 3 | 0 | 1 |
| 3.11 | 0  | 3 | 0 | 1 |
| 2.12 | 1  | 1 | 1 | 1 |
| 2.12 | 0  | 1 | 1 | 1 |
| 2.78 | 2  | 2 | 2 | 2 |
| 3.22 | 5  | 2 | 2 | 2 |
| 2.12 | 1  | 1 | 1 | 1 |
| 2.12 | 3  | 1 | 1 | 1 |
| 2.23 | 1  | 1 | 1 | 1 |
| 2.78 | 1  | 3 | 1 | 1 |
| 3    | 0  | 2 | 0 | 1 |
| 3.11 | 0  | 1 | 0 | 1 |
| 3.11 | 0  | 4 | 0 | 1 |
| 3.11 | 3  | 1 | 0 | 1 |
| 3    | 1  | 2 | 0 | 1 |
| 4.43 | 7  | 6 | 1 | 2 |
| 2.89 | 2  | 1 | 0 | 1 |
| 2.56 | 1  | 1 | 0 | 1 |
| 2.56 | 0  | 3 | 0 | 1 |
| 3.11 | 1  | 2 | 0 | 1 |
| 3.11 | 5  | 2 | 1 | 1 |
| 3.22 | 3  | 3 | 1 | 1 |
| 3.22 | 2  | 3 | 1 | 1 |
| 5.09 | 8  | 5 | 1 | 2 |
| 3.11 | 0  | 3 | 0 | 1 |
| 2.56 | 0  | 3 | 0 | 1 |
| 3.22 | 7  | 2 | 1 | 1 |
| 3.44 | 4  | 2 | 1 | 1 |
| 3.55 | 7  | 2 | 1 | 1 |
| 3.44 | 8  | 2 | 1 | 1 |
| 3.33 | 5  | 2 | 1 | 1 |
| 3.22 | 6  | 2 | 1 | 1 |
| 3.55 | 4  | 4 | 1 | 1 |
| 3.44 | 7  | 3 | 2 | 1 |

|      |    |   |   |   |
|------|----|---|---|---|
| 3.55 | 4  | 4 | 1 | 1 |
| 3.44 | 5  | 4 | 1 | 1 |
| 3.33 | 2  | 4 | 1 | 1 |
| 3.55 | 6  | 2 | 1 | 2 |
| 3.66 | 7  | 2 | 1 | 2 |
| 3.11 | 2  | 2 | 1 | 2 |
| 3.33 | 4  | 2 | 1 | 2 |
| 3.33 | 6  | 3 | 1 | 1 |
| 3.44 | 5  | 3 | 1 | 1 |
| 3.11 | 4  | 3 | 3 | 2 |
| 3.55 | 5  | 3 | 3 | 1 |
| 3.55 | 9  | 1 | 1 | 1 |
| 3.66 | 10 | 1 | 1 | 1 |
| 3.55 | 9  | 1 | 0 | 1 |
| 3.33 | 7  | 1 | 1 | 1 |
| 3.22 | 3  | 3 | 1 | 1 |
| 3.22 | 6  | 2 | 1 | 2 |
| 3.55 | 9  | 1 | 1 | 1 |
| 3.55 | 6  | 2 | 2 | 2 |
| 3.33 | 4  | 2 | 2 | 2 |
| 3.66 | 5  | 3 | 2 | 1 |
| 3.55 | 4  | 3 | 2 | 1 |
| 3.22 | 1  | 3 | 2 | 1 |
| 3.44 | 3  | 3 | 2 | 1 |
| 3.11 | 0  | 3 | 2 | 1 |
| 3.11 | 3  | 2 | 1 | 1 |
| 3.11 | 0  | 4 | 1 | 1 |
| 3.11 | 0  | 4 | 1 | 1 |
| 3    | 1  | 4 | 1 | 1 |
| 3.55 | 4  | 4 | 3 | 1 |
| 3.33 | 4  | 3 | 1 | 1 |
| 2.78 | 1  | 3 | 1 | 1 |
| 3.33 | 4  | 3 | 1 | 1 |
| 3.22 | 2  | 3 | 1 | 1 |
| 3.33 | 2  | 3 | 2 | 1 |
| 3.66 | 7  | 3 | 3 | 2 |
| 3.11 | 4  | 3 | 3 | 2 |
| 3.66 | 7  | 3 | 3 | 2 |
| 2.34 | 3  | 2 | 1 | 1 |
| 3.33 | 10 | 1 | 1 | 1 |
| 2.45 | 1  | 1 | 1 | 1 |

|      |    |   |   |   |
|------|----|---|---|---|
| 2.45 | 1  | 1 | 0 | 1 |
| 3.11 | 2  | 4 | 0 | 1 |
| 3.33 | 3  | 3 | 2 | 2 |
| 2.45 | 0  | 3 | 0 | 1 |
| 3.11 | 7  | 0 | 0 | 0 |
| 3.11 | 3  | 1 | 0 | 1 |
| 2.56 | 3  | 0 | 0 | 0 |
| 2.56 | 1  | 2 | 0 | 1 |
| 2.56 | 7  | 0 | 0 | 0 |
| 2.45 | 7  | 0 | 0 | 0 |
| 3.22 | 8  | 2 | 1 | 1 |
| 3.22 | 8  | 2 | 1 | 1 |
| 3.44 | 4  | 2 | 1 | 1 |
| 3.66 | 6  | 2 | 1 | 1 |
| 2.45 | 1  | 1 | 1 | 1 |
| 2.45 | 2  | 1 | 1 | 1 |
| 3    | 1  | 3 | 1 | 1 |
| 2.45 | 8  | 0 | 0 | 0 |
| 3.44 | 6  | 2 | 2 | 2 |
| 3.99 | 9  | 2 | 2 | 2 |
| 3.55 | 5  | 3 | 3 | 1 |
| 2.56 | 0  | 2 | 0 | 1 |
| 3.33 | 3  | 3 | 1 | 1 |
| 3.55 | 5  | 3 | 1 | 1 |
| 3.55 | 4  | 3 | 1 | 1 |
| 3.44 | 5  | 3 | 1 | 1 |
| 3.33 | 2  | 3 | 1 | 1 |
| 3.44 | 4  | 3 | 1 | 1 |
| 3.55 | 3  | 3 | 1 | 1 |
| 3.44 | 3  | 3 | 1 | 1 |
| 3.11 | 0  | 3 | 1 | 1 |
| 3.44 | 5  | 3 | 1 | 1 |
| 3.44 | 5  | 3 | 1 | 1 |
| 3.33 | 4  | 3 | 1 | 1 |
| 3.11 | 1  | 2 | 0 | 1 |
| 3.33 | 5  | 2 | 2 | 2 |
| 3.66 | 6  | 3 | 2 | 2 |
| 3.66 | 1  | 6 | 2 | 2 |
| 3.66 | 1  | 5 | 2 | 2 |
| 2.78 | 10 | 1 | 1 | 1 |
| 2.34 | 6  | 1 | 1 | 1 |



|      |    |   |   |   |
|------|----|---|---|---|
| 2.56 | 4  | 1 | 1 | 1 |
| 3.22 | 3  | 3 | 2 | 1 |
| 2.56 | 0  | 1 | 1 | 1 |
| 3.11 | 8  | 2 | 1 | 2 |
| 4.54 | 7  | 6 | 1 | 2 |
| 2.45 | 3  | 1 | 1 | 1 |
| 5.09 | 13 | 3 | 1 | 2 |
| 2.34 | 3  | 1 | 1 | 1 |
| 2.45 | 5  | 1 | 1 | 1 |
| 2.45 | 0  | 3 | 0 | 1 |
| 3.44 | 5  | 3 | 1 | 1 |
| 3.44 | 4  | 3 | 1 | 1 |
| 3.55 | 6  | 2 | 1 | 2 |
| 2.89 | 5  | 2 | 2 | 2 |
| 3.11 | 4  | 1 | 0 | 1 |
| 3    | 1  | 2 | 0 | 1 |
| 3.11 | 1  | 2 | 0 | 1 |
| 3.11 | 1  | 2 | 0 | 1 |
| 2.56 | 1  | 1 | 0 | 1 |
| 3.22 | 6  | 2 | 2 | 2 |
| 3    | 0  | 3 | 0 | 1 |
| 2.01 | 1  | 1 | 1 | 1 |
| 3.88 | 8  | 2 | 2 | 2 |
| 2.12 | 5  | 0 | 0 | 0 |
| 3.55 | 4  | 3 | 1 | 1 |
| 2.23 | 7  | 0 | 0 | 0 |
| 2.34 | 3  | 1 | 1 | 1 |
| 3.77 | 8  | 2 | 2 | 2 |
| 2.45 | 2  | 1 | 1 | 1 |
| 3.44 | 4  | 3 | 1 | 1 |
| 2.56 | 0  | 1 | 1 | 1 |
| 2.34 | 2  | 1 | 1 | 1 |
| 2.56 | 1  | 1 | 0 | 1 |
| 2.34 | 0  | 2 | 2 | 1 |
| 2.34 | 1  | 3 | 0 | 2 |
| 2.56 | 1  | 1 | 0 | 1 |
| 2.56 | 6  | 0 | 0 | 0 |
| 3.22 | 14 | 0 | 0 | 0 |
| 3.11 | 0  | 4 | 0 | 1 |
| 3.88 | 4  | 3 | 2 | 3 |
| 3.77 | 4  | 3 | 2 | 3 |

|      |    |   |   |   |
|------|----|---|---|---|
| 3.77 | 3  | 4 | 3 | 3 |
| 3.66 | 1  | 5 | 3 | 2 |
| 2.56 | 1  | 1 | 1 | 1 |
| 2.12 | 4  | 1 | 1 | 1 |
| 2.45 | 3  | 1 | 1 | 1 |
| 5.75 | 10 | 6 | 2 | 2 |
| 2.45 | 1  | 1 | 1 | 1 |
| 3    | 7  | 0 | 0 | 0 |
| 2.34 | 7  | 0 | 0 | 0 |
| 2.45 | 6  | 0 | 0 | 0 |
| 3.44 | 5  | 2 | 1 | 2 |
| 3.44 | 3  | 3 | 2 | 1 |
| 3.22 | 1  | 3 | 2 | 1 |
| 2.89 | 6  | 2 | 2 | 2 |
| 2.89 | 7  | 2 | 2 | 2 |
| 2.23 | 6  | 0 | 0 | 0 |
| 2.56 | 1  | 1 | 1 | 1 |
| 2.12 | 2  | 1 | 1 | 1 |
| 2.01 | 1  | 1 | 1 | 1 |
| 3.22 | 15 | 0 | 0 | 0 |
| 3.66 | 10 | 1 | 1 | 1 |
| 2.34 | 1  | 1 | 1 | 1 |
| 4.1  | 11 | 2 | 1 | 2 |
| 4.21 | 9  | 3 | 1 | 1 |
| 3.88 | 9  | 2 | 1 | 2 |
| 3.99 | 7  | 3 | 1 | 1 |
| 2.34 | 0  | 1 | 1 | 1 |
| 2.23 | 2  | 1 | 1 | 1 |
| 2.12 | 0  | 1 | 1 | 1 |
| 2.56 | 1  | 1 | 1 | 1 |
| 2.67 | 0  | 1 | 1 | 1 |
| 2.45 | 2  | 1 | 0 | 1 |
| 3.88 | 3  | 4 | 2 | 2 |
| 3.77 | 4  | 4 | 2 | 2 |
| 2.45 | 1  | 1 | 1 | 1 |
| 2.23 | 2  | 1 | 1 | 1 |
| 2.01 | 1  | 2 | 1 | 1 |
| 2.34 | 1  | 1 | 1 | 1 |
| 2.67 | 2  | 1 | 1 | 1 |
| 3.44 | 9  | 2 | 1 | 2 |
| 3.33 | 10 | 2 | 1 | 2 |

|       |                                                                                     |             |            |             |
|-------|-------------------------------------------------------------------------------------|-------------|------------|-------------|
| 3.33  | 3                                                                                   | 3           | 2          | 2           |
| 3.22  | 4                                                                                   | 3           | 2          | 2           |
| 3.33  | 3                                                                                   | 4           | 2          | 2           |
| 3.33  | 3                                                                                   | 4           | 2          | 2           |
| 3.11  | 3                                                                                   | 4           | 2          | 2           |
| 3.22  | 3                                                                                   | 3           | 2          | 2           |
| 3     | 11                                                                                  | 0           | 0          | 0           |
| 2.56  | 1                                                                                   | 2           | 0          | 1           |
| 3.11  | 1                                                                                   | 5           | 0          | 1           |
| 4.1   | 12                                                                                  | 1           | 1          | 1           |
| 3.22  | 12                                                                                  | 0           | 0          | 0           |
| 2.34  | 1                                                                                   | 1           | 1          | 1           |
| 2.56  | 0                                                                                   | 1           | 0          | 1           |
| 2.56  | 1                                                                                   | 1           | 1          | 1           |
| 3.44  | 4                                                                                   | 4           | 1          | 1           |
| 2.67  | 1                                                                                   | 3           | 1          | 2           |
| 2.45  | 1                                                                                   | 1           | 1          | 1           |
| 2.23  | 0                                                                                   | 1           | 1          | 1           |
| 3.11  | 6                                                                                   | 0           | 0          | 0           |
| 3.11  | 4                                                                                   | 2           | 2          | 2           |
| 3.22  | 5                                                                                   | 2           | 2          | 2           |
| 3.11  | 3                                                                                   | 1           | 0          | 1           |
| 2.56  | 3                                                                                   | 0           | 0          | 0           |
| 3.11  | 1                                                                                   | 2           | 0          | 1           |
| 2.45  | 0                                                                                   | 3           | 0          | 1           |
|       |                                                                                     |             |            |             |
|       | <b>Metabolites after MDS using ADMET (112) (used for HCA and Scaffold analysis)</b> |             |            |             |
| MLogP | nRotB                                                                               | nSmallRings | nAromRings | nRingBlocks |
|       |                                                                                     |             |            |             |
| 2.12  | 1                                                                                   | 1           | 1          | 1           |
| 3.66  | 5                                                                                   | 3           | 1          | 1           |
| 3.22  | 3                                                                                   | 3           | 1          | 1           |
| 3.44  | 8                                                                                   | 2           | 1          | 1           |
| 2.34  | 1                                                                                   | 1           | 1          | 1           |
| 2.78  | 3                                                                                   | 3           | 2          | 1           |
| 3.55  | 9                                                                                   | 2           | 1          | 1           |
| 3.55  | 11                                                                                  | 1           | 1          | 1           |
| 2.89  | 4                                                                                   | 3           | 2          | 1           |
| 3.55  | 11                                                                                  | 1           | 0          | 1           |
| 3.22  | 7                                                                                   | 2           | 1          | 1           |

|      |    |   |   |   |
|------|----|---|---|---|
| 3.55 | 6  | 3 | 1 | 1 |
| 3.55 | 4  | 3 | 1 | 1 |
| 3.44 | 7  | 2 | 1 | 1 |
| 3.44 | 4  | 3 | 2 | 1 |
| 2.89 | 2  | 3 | 1 | 1 |
| 3.33 | 8  | 3 | 2 | 1 |
| 3.44 | 4  | 3 | 1 | 1 |
| 3.44 | 4  | 3 | 1 | 1 |
| 3.44 | 4  | 4 | 1 | 1 |
| 3.44 | 4  | 4 | 1 | 1 |
| 3.44 | 4  | 3 | 1 | 1 |
| 3.55 | 6  | 3 | 1 | 1 |
| 3.44 | 4  | 3 | 1 | 1 |
| 3.44 | 4  | 3 | 1 | 1 |
| 3.44 | 4  | 3 | 1 | 1 |
| 3.55 | 11 | 1 | 1 | 1 |
| 2.78 | 1  | 3 | 1 | 1 |
| 3.88 | 10 | 2 | 2 | 2 |
| 3.44 | 6  | 3 | 1 | 1 |
| 2.78 | 1  | 3 | 1 | 1 |
| 3.11 | 5  | 2 | 1 | 1 |
| 3.22 | 3  | 3 | 1 | 1 |
| 3.22 | 2  | 3 | 1 | 1 |
| 3.22 | 7  | 2 | 1 | 1 |
| 3.44 | 4  | 2 | 1 | 1 |
| 3.44 | 8  | 2 | 1 | 1 |
| 3.22 | 6  | 2 | 1 | 1 |
| 3.44 | 7  | 3 | 2 | 1 |
| 3.44 | 5  | 4 | 1 | 1 |
| 3.33 | 2  | 4 | 1 | 1 |
| 3.55 | 6  | 2 | 1 | 2 |
| 3.66 | 7  | 2 | 1 | 2 |
| 3.11 | 2  | 2 | 1 | 2 |
| 3.33 | 4  | 2 | 1 | 2 |
| 3.33 | 6  | 3 | 1 | 1 |
| 3.44 | 5  | 3 | 1 | 1 |
| 3.55 | 5  | 3 | 3 | 1 |
| 3.22 | 3  | 3 | 1 | 1 |
| 3.55 | 6  | 2 | 2 | 2 |
| 3.33 | 4  | 2 | 2 | 2 |
| 3.66 | 5  | 3 | 2 | 1 |

|      |   |   |   |   |
|------|---|---|---|---|
| 3.55 | 4 | 3 | 2 | 1 |
| 3.22 | 1 | 3 | 2 | 1 |
| 3.44 | 3 | 3 | 2 | 1 |
| 3.11 | 0 | 3 | 2 | 1 |
| 3.11 | 3 | 2 | 1 | 1 |
| 3.11 | 0 | 4 | 1 | 1 |
| 3    | 1 | 4 | 1 | 1 |
| 3.55 | 4 | 4 | 3 | 1 |
| 2.78 | 1 | 3 | 1 | 1 |
| 3.22 | 2 | 3 | 1 | 1 |
| 3.33 | 2 | 3 | 2 | 1 |
| 2.34 | 3 | 2 | 1 | 1 |
| 3.22 | 8 | 2 | 1 | 1 |
| 3.22 | 8 | 2 | 1 | 1 |
| 3.44 | 4 | 2 | 1 | 1 |
| 3.66 | 6 | 2 | 1 | 1 |
| 2.45 | 2 | 1 | 1 | 1 |
| 3    | 1 | 3 | 1 | 1 |
| 3.99 | 9 | 2 | 2 | 2 |
| 3.55 | 5 | 3 | 3 | 1 |
| 3.33 | 3 | 3 | 1 | 1 |
| 3.55 | 5 | 3 | 1 | 1 |
| 3.55 | 4 | 3 | 1 | 1 |
| 3.44 | 5 | 3 | 1 | 1 |
| 3.33 | 2 | 3 | 1 | 1 |
| 3.44 | 4 | 3 | 1 | 1 |
| 3.55 | 3 | 3 | 1 | 1 |
| 3.44 | 3 | 3 | 1 | 1 |
| 3.11 | 0 | 3 | 1 | 1 |
| 3.44 | 5 | 3 | 1 | 1 |
| 3.44 | 5 | 3 | 1 | 1 |
| 3.33 | 4 | 3 | 1 | 1 |
| 3.44 | 5 | 3 | 1 | 1 |
| 3.44 | 4 | 3 | 1 | 1 |
| 3.55 | 6 | 2 | 1 | 2 |
| 3.88 | 8 | 2 | 2 | 2 |
| 3.55 | 4 | 3 | 1 | 1 |
| 3.77 | 8 | 2 | 2 | 2 |
| 3.44 | 4 | 3 | 1 | 1 |
| 3.88 | 4 | 3 | 2 | 3 |
| 3.77 | 4 | 3 | 2 | 3 |

|             |                                                             |         |         |         |
|-------------|-------------------------------------------------------------|---------|---------|---------|
| 3.77        | 3                                                           | 4       | 3       | 3       |
| 3.66        | 1                                                           | 5       | 3       | 2       |
| 3.44        | 5                                                           | 2       | 1       | 2       |
| 3.44        | 3                                                           | 3       | 2       | 1       |
| 3.22        | 1                                                           | 3       | 2       | 1       |
| 4.1         | 11                                                          | 2       | 1       | 2       |
| 3.88        | 9                                                           | 2       | 1       | 2       |
| 3.88        | 3                                                           | 4       | 2       | 2       |
| 3.77        | 4                                                           | 4       | 2       | 2       |
| 2.67        | 2                                                           | 1       | 1       | 1       |
| 3.33        | 10                                                          | 2       | 1       | 2       |
| 3.33        | 3                                                           | 3       | 2       | 2       |
| 3.22        | 4                                                           | 3       | 2       | 2       |
| 3.33        | 3                                                           | 4       | 2       | 2       |
| 3.11        | 3                                                           | 4       | 2       | 2       |
| 3.22        | 3                                                           | 3       | 2       | 2       |
| 3.44        | 4                                                           | 4       | 1       | 1       |
| 2.67        | 1                                                           | 3       | 1       | 2       |
| 2.45        | 1                                                           | 1       | 1       | 1       |
|             |                                                             |         |         |         |
|             | <b>468 Metabolites and positive &amp; negative controls</b> |         |         |         |
| nAromBlocks | nRings3                                                     | nRings4 | nRings5 | nRings6 |
|             |                                                             |         |         |         |
| 1           | 0                                                           | 0       | 1       | 6       |
| 1           | 0                                                           | 0       | 0       | 2       |
| 2           | 0                                                           | 0       | 0       | 3       |
| 2           | 0                                                           | 0       | 0       | 3       |
| 1           | 0                                                           | 0       | 0       | 2       |
| 3           | 0                                                           | 0       | 1       | 4       |
| 2           | 0                                                           | 0       | 0       | 3       |
| 2           | 0                                                           | 0       | 0       | 3       |
| 2           | 0                                                           | 0       | 1       | 2       |
| 1           | 0                                                           | 0       | 1       | 2       |
| 1           | 0                                                           | 0       | 1       | 4       |
| 1           | 0                                                           | 0       | 1       | 4       |
| 1           | 0                                                           | 0       | 1       | 4       |
| 2           | 0                                                           | 0       | 1       | 3       |
| 2           | 0                                                           | 0       | 0       | 2       |
| 2           | 0                                                           | 0       | 2       | 0       |
| 3           | 0                                                           | 0       | 0       | 4       |

|   |   |   |   |   |
|---|---|---|---|---|
| 0 | 0 | 0 | 0 | 0 |
| 2 | 0 | 0 | 2 | 0 |
| 2 | 0 | 0 | 1 | 2 |
| 1 | 0 | 0 | 1 | 6 |
| 2 | 0 | 0 | 0 | 3 |
| 1 | 0 | 0 | 1 | 4 |
| 1 | 0 | 0 | 1 | 4 |
| 1 | 0 | 0 | 1 | 4 |
| 2 | 0 | 0 | 0 | 2 |
| 1 | 0 | 0 | 0 | 2 |
| 2 | 0 | 0 | 1 | 3 |
| 1 | 0 | 0 | 0 | 2 |
| 1 | 0 | 0 | 1 | 4 |
| 1 | 0 | 0 | 1 | 4 |
| 1 | 0 | 0 | 1 | 4 |
| 1 | 0 | 0 | 1 | 4 |
| 1 | 0 | 0 | 0 | 2 |
| 2 | 0 | 0 | 0 | 2 |
| 1 | 0 | 0 | 0 | 2 |
| 1 | 0 | 0 | 0 | 2 |
| 1 | 0 | 0 | 0 | 2 |
| 2 | 0 | 0 | 0 | 2 |
| 2 | 0 | 0 | 0 | 3 |
| 1 | 0 | 0 | 0 | 2 |
| 2 | 0 | 0 | 0 | 4 |
| 2 | 0 | 0 | 0 | 5 |
| 2 | 0 | 0 | 0 | 3 |
| 2 | 0 | 0 | 0 | 3 |
| 2 | 0 | 0 | 0 | 4 |
| 1 | 0 | 0 | 0 | 1 |
| 1 | 0 | 0 | 0 | 2 |
| 1 | 0 | 0 | 0 | 4 |
| 1 | 0 | 0 | 0 | 2 |
| 1 | 0 | 0 | 0 | 2 |
| 2 | 0 | 0 | 1 | 2 |
| 1 | 0 | 0 | 1 | 4 |
| 1 | 0 | 0 | 1 | 4 |
| 2 | 0 | 0 | 1 | 2 |
| 1 | 0 | 0 | 0 | 2 |
| 1 | 0 | 0 | 0 | 2 |
| 1 | 0 | 0 | 0 | 2 |

|   |   |   |   |   |
|---|---|---|---|---|
| 2 | 0 | 0 | 0 | 4 |
| 1 | 0 | 0 | 1 | 3 |
| 1 | 0 | 0 | 1 | 1 |
| 2 | 0 | 0 | 0 | 3 |
| 1 | 0 | 0 | 0 | 1 |
| 0 | 0 | 0 | 0 | 0 |
| 0 | 0 | 0 | 0 | 0 |
| 0 | 0 | 0 | 0 | 0 |
| 0 | 0 | 0 | 0 | 0 |
| 0 | 0 | 0 | 0 | 0 |
| 1 | 0 | 0 | 0 | 1 |
| 1 | 0 | 0 | 0 | 1 |
| 0 | 0 | 0 | 0 | 0 |
| 0 | 0 | 0 | 0 | 0 |
| 1 | 0 | 0 | 1 | 1 |
| 0 | 0 | 0 | 0 | 0 |
| 0 | 0 | 0 | 2 | 0 |
| 0 | 0 | 0 | 0 | 0 |
| 0 | 0 | 0 | 0 | 1 |
| 0 | 0 | 0 | 0 | 0 |
| 1 | 0 | 0 | 1 | 0 |
| 0 | 0 | 0 | 0 | 0 |
| 0 | 0 | 0 | 0 | 0 |
| 0 | 0 | 0 | 0 | 0 |
| 0 | 0 | 0 | 0 | 0 |
| 0 | 0 | 0 | 0 | 0 |
| 0 | 0 | 0 | 0 | 0 |
| 1 | 0 | 0 | 0 | 1 |
| 0 | 0 | 0 | 0 | 0 |
| 1 | 0 | 0 | 0 | 3 |
| 2 | 0 | 0 | 1 | 1 |
| 1 | 0 | 0 | 1 | 1 |
| 1 | 0 | 0 | 0 | 1 |
| 0 | 0 | 0 | 0 | 0 |
| 1 | 0 | 0 | 0 | 3 |
| 0 | 0 | 0 | 0 | 0 |
| 1 | 0 | 0 | 0 | 1 |
| 1 | 0 | 0 | 0 | 1 |
| 1 | 0 | 0 | 0 | 1 |
| 1 | 0 | 0 | 0 | 1 |
| 1 | 0 | 0 | 0 | 1 |
| 0 | 0 | 0 | 0 | 0 |



|   |   |   |   |   |
|---|---|---|---|---|
| 0 | 0 | 0 | 0 | 0 |
| 0 | 0 | 0 | 0 | 0 |
| 0 | 0 | 0 | 0 | 0 |
| 0 | 0 | 0 | 0 | 0 |
| 0 | 0 | 0 | 0 | 0 |
| 1 | 0 | 0 | 0 | 1 |
| 1 | 0 | 0 | 0 | 1 |
| 1 | 0 | 0 | 0 | 1 |
| 1 | 0 | 0 | 0 | 1 |
| 0 | 0 | 0 | 0 | 0 |
| 0 | 0 | 0 | 0 | 0 |
| 1 | 0 | 0 | 0 | 1 |
| 1 | 0 | 0 | 0 | 1 |
| 0 | 0 | 0 | 0 | 0 |
| 0 | 0 | 0 | 0 | 0 |
| 1 | 0 | 0 | 0 | 1 |
| 1 | 0 | 0 | 0 | 3 |
| 0 | 0 | 0 | 0 | 1 |
| 0 | 0 | 0 | 0 | 0 |
| 1 | 0 | 0 | 0 | 1 |
| 1 | 0 | 0 | 0 | 1 |
| 0 | 1 | 0 | 0 | 0 |
| 1 | 0 | 0 | 0 | 2 |
| 1 | 0 | 0 | 1 | 0 |
| 0 | 0 | 0 | 0 | 0 |
| 0 | 0 | 0 | 0 | 0 |
| 0 | 0 | 0 | 0 | 0 |
| 1 | 0 | 0 | 0 | 1 |
| 1 | 0 | 0 | 0 | 1 |
| 1 | 0 | 0 | 0 | 1 |
| 1 | 0 | 0 | 0 | 3 |
| 1 | 0 | 0 | 0 | 1 |
| 0 | 0 | 0 | 0 | 0 |
| 1 | 0 | 0 | 0 | 1 |
| 1 | 0 | 0 | 0 | 1 |
| 1 | 0 | 0 | 0 | 2 |
| 1 | 0 | 0 | 0 | 1 |
| 1 | 0 | 0 | 0 | 1 |
| 0 | 0 | 0 | 0 | 0 |
| 0 | 0 | 0 | 1 | 0 |
| 0 | 0 | 0 | 0 | 0 |

|   |   |   |   |   |
|---|---|---|---|---|
| 1 | 0 | 0 | 0 | 1 |
| 0 | 0 | 0 | 0 | 0 |
| 2 | 0 | 0 | 0 | 3 |
| 1 | 0 | 0 | 0 | 3 |
| 1 | 0 | 0 | 0 | 2 |
| 1 | 0 | 0 | 0 | 1 |
| 0 | 1 | 0 | 0 | 1 |
| 1 | 0 | 0 | 0 | 1 |
| 2 | 0 | 0 | 0 | 3 |
| 1 | 0 | 0 | 0 | 2 |
| 0 | 0 | 0 | 0 | 0 |
| 1 | 0 | 0 | 0 | 1 |
| 1 | 0 | 0 | 0 | 1 |
| 1 | 0 | 0 | 0 | 1 |
| 1 | 0 | 0 | 0 | 1 |
| 1 | 0 | 0 | 0 | 4 |
| 2 | 0 | 0 | 0 | 4 |
| 0 | 0 | 0 | 0 | 1 |
| 1 | 0 | 0 | 0 | 1 |
| 1 | 0 | 0 | 0 | 1 |
| 1 | 0 | 0 | 0 | 1 |
| 2 | 0 | 0 | 0 | 2 |
| 1 | 0 | 0 | 1 | 1 |
| 0 | 0 | 0 | 0 | 1 |
| 1 | 1 | 0 | 0 | 1 |
| 1 | 1 | 0 | 0 | 1 |
| 1 | 0 | 0 | 0 | 2 |
| 1 | 0 | 0 | 0 | 2 |
| 3 | 0 | 0 | 0 | 5 |
| 2 | 0 | 0 | 0 | 3 |
| 1 | 0 | 0 | 0 | 3 |
| 1 | 0 | 0 | 0 | 3 |
| 1 | 0 | 0 | 0 | 2 |
| 2 | 0 | 0 | 0 | 3 |
| 1 | 0 | 0 | 1 | 2 |
| 1 | 0 | 0 | 1 | 2 |
| 1 | 0 | 0 | 0 | 3 |
| 2 | 0 | 0 | 0 | 3 |
| 2 | 0 | 0 | 0 | 3 |
| 1 | 0 | 0 | 0 | 3 |
| 1 | 0 | 0 | 0 | 3 |

|   |   |   |   |   |
|---|---|---|---|---|
| 1 | 1 | 0 | 0 | 3 |
| 1 | 0 | 0 | 0 | 3 |
| 1 | 1 | 0 | 0 | 3 |
| 1 | 0 | 0 | 0 | 3 |
| 1 | 0 | 0 | 0 | 3 |
| 1 | 0 | 0 | 0 | 3 |
| 1 | 0 | 0 | 0 | 3 |
| 1 | 0 | 0 | 0 | 3 |
| 1 | 0 | 0 | 0 | 3 |
| 1 | 0 | 0 | 0 | 3 |
| 1 | 0 | 0 | 0 | 3 |
| 1 | 0 | 0 | 0 | 1 |
| 0 | 0 | 0 | 0 | 0 |
| 0 | 0 | 0 | 0 | 0 |
| 0 | 0 | 0 | 0 | 0 |
| 0 | 0 | 0 | 0 | 0 |
| 1 | 0 | 0 | 0 | 1 |
| 0 | 0 | 0 | 0 | 1 |
| 0 | 0 | 0 | 0 | 0 |
| 1 | 0 | 0 | 0 | 1 |
| 0 | 1 | 0 | 1 | 0 |
| 0 | 0 | 0 | 0 | 1 |
| 0 | 0 | 0 | 1 | 0 |
| 0 | 0 | 0 | 0 | 2 |
| 1 | 0 | 0 | 0 | 5 |
| 1 | 0 | 0 | 1 | 2 |
| 0 | 0 | 0 | 2 | 1 |
| 0 | 0 | 1 | 0 | 2 |
| 0 | 0 | 1 | 0 | 4 |
| 0 | 1 | 0 | 1 | 1 |
| 0 | 0 | 0 | 0 | 2 |
| 0 | 0 | 0 | 1 | 0 |
| 0 | 1 | 0 | 1 | 0 |
| 0 | 0 | 0 | 0 | 0 |
| 0 | 0 | 0 | 0 | 1 |
| 0 | 0 | 0 | 0 | 0 |
| 0 | 0 | 1 | 0 | 2 |
| 1 | 0 | 0 | 0 | 1 |
| 0 | 0 | 0 | 0 | 1 |
| 0 | 0 | 1 | 0 | 2 |
| 0 | 0 | 0 | 0 | 2 |
| 1 | 0 | 0 | 0 | 4 |

|   |   |   |   |   |
|---|---|---|---|---|
| 0 | 0 | 0 | 0 | 1 |
| 0 | 0 | 0 | 0 | 1 |
| 0 | 1 | 0 | 1 | 0 |
| 0 | 0 | 1 | 0 | 2 |
| 0 | 0 | 1 | 0 | 4 |
| 2 | 0 | 0 | 0 | 2 |
| 2 | 0 | 0 | 0 | 2 |
| 2 | 0 | 0 | 0 | 2 |
| 2 | 0 | 0 | 0 | 2 |
| 1 | 0 | 0 | 0 | 1 |
| 1 | 0 | 0 | 2 | 1 |
| 0 | 0 | 0 | 0 | 1 |
| 1 | 0 | 0 | 0 | 2 |
| 1 | 0 | 1 | 1 | 2 |
| 2 | 0 | 0 | 0 | 3 |
| 2 | 0 | 0 | 0 | 2 |
| 2 | 0 | 0 | 0 | 2 |
| 2 | 0 | 0 | 0 | 2 |
| 2 | 0 | 0 | 0 | 2 |
| 0 | 1 | 0 | 0 | 2 |
| 0 | 1 | 0 | 1 | 0 |
| 1 | 0 | 0 | 0 | 1 |
| 1 | 0 | 0 | 0 | 1 |
| 2 | 0 | 0 | 0 | 2 |
| 2 | 0 | 0 | 0 | 2 |
| 1 | 0 | 0 | 0 | 1 |
| 1 | 0 | 0 | 0 | 1 |
| 1 | 0 | 0 | 0 | 1 |
| 1 | 0 | 0 | 0 | 1 |
| 1 | 0 | 0 | 1 | 2 |
| 0 | 1 | 1 | 0 | 0 |
| 0 | 0 | 1 | 0 | 0 |
| 0 | 0 | 0 | 2 | 1 |
| 0 | 0 | 0 | 0 | 1 |
| 0 | 0 | 0 | 0 | 2 |
| 0 | 0 | 0 | 2 | 1 |
| 1 | 0 | 0 | 2 | 4 |
| 1 | 0 | 0 | 0 | 1 |
| 0 | 0 | 0 | 0 | 1 |
| 0 | 0 | 0 | 0 | 1 |
| 0 | 0 | 1 | 0 | 2 |

|   |   |   |   |   |
|---|---|---|---|---|
| 0 | 0 | 0 | 0 | 2 |
| 0 | 0 | 0 | 1 | 4 |
| 1 | 0 | 0 | 1 | 0 |
| 1 | 0 | 0 | 0 | 2 |
| 1 | 0 | 0 | 1 | 2 |
| 1 | 0 | 0 | 1 | 2 |
| 1 | 0 | 0 | 0 | 3 |
| 0 | 0 | 0 | 2 | 1 |
| 1 | 0 | 0 | 0 | 5 |
| 0 | 0 | 0 | 0 | 0 |
| 0 | 0 | 0 | 0 | 0 |
| 1 | 0 | 0 | 0 | 3 |
| 0 | 1 | 0 | 0 | 2 |
| 0 | 0 | 0 | 2 | 1 |
| 1 | 0 | 0 | 0 | 2 |
| 1 | 0 | 0 | 0 | 2 |
| 1 | 0 | 0 | 0 | 2 |
| 1 | 0 | 0 | 0 | 2 |
| 1 | 0 | 0 | 0 | 2 |
| 1 | 0 | 0 | 0 | 2 |
| 1 | 0 | 0 | 0 | 2 |
| 1 | 0 | 0 | 0 | 2 |
| 1 | 0 | 0 | 0 | 2 |
| 1 | 0 | 0 | 0 | 4 |
| 1 | 0 | 0 | 1 | 2 |
| 1 | 0 | 1 | 1 | 2 |
| 1 | 0 | 1 | 1 | 2 |
| 1 | 0 | 1 | 1 | 2 |
| 1 | 0 | 0 | 0 | 2 |
| 1 | 0 | 0 | 0 | 2 |
| 1 | 0 | 0 | 0 | 2 |
| 1 | 0 | 0 | 0 | 2 |
| 1 | 0 | 0 | 0 | 2 |
| 1 | 0 | 0 | 0 | 2 |
| 1 | 0 | 0 | 0 | 2 |
| 1 | 0 | 0 | 0 | 2 |
| 1 | 0 | 0 | 0 | 2 |
| 1 | 0 | 0 | 0 | 2 |
| 1 | 0 | 0 | 1 | 2 |
| 1 | 0 | 0 | 1 | 2 |
| 1 | 0 | 0 | 1 | 2 |
| 2 | 0 | 0 | 0 | 3 |
| 1 | 0 | 0 | 1 | 2 |
| 1 | 0 | 0 | 0 | 1 |
| 1 | 0 | 0 | 0 | 1 |
| 1 | 0 | 0 | 0 | 1 |
| 1 | 0 | 0 | 0 | 1 |
| 0 | 0 | 0 | 0 | 1 |

|   |   |   |   |   |
|---|---|---|---|---|
| 1 | 0 | 0 | 0 | 1 |
| 1 | 0 | 0 | 0 | 1 |
| 1 | 0 | 0 | 1 | 2 |
| 1 | 0 | 0 | 1 | 1 |
| 1 | 0 | 0 | 0 | 1 |
| 1 | 0 | 0 | 0 | 1 |
| 2 | 0 | 0 | 0 | 2 |
| 2 | 0 | 0 | 0 | 2 |
| 2 | 0 | 0 | 0 | 3 |
| 2 | 0 | 0 | 0 | 3 |
| 2 | 0 | 0 | 0 | 3 |
| 2 | 0 | 0 | 0 | 3 |
| 2 | 0 | 0 | 0 | 3 |
| 2 | 0 | 0 | 0 | 3 |
| 1 | 0 | 0 | 0 | 2 |
| 1 | 0 | 0 | 0 | 2 |
| 1 | 0 | 0 | 0 | 4 |
| 1 | 0 | 1 | 1 | 2 |
| 1 | 0 | 1 | 1 | 2 |
| 1 | 0 | 0 | 1 | 2 |
| 1 | 0 | 0 | 0 | 3 |
| 0 | 0 | 0 | 0 | 1 |
| 4 | 0 | 0 | 0 | 5 |
| 4 | 0 | 0 | 0 | 5 |
| 4 | 0 | 0 | 0 | 5 |
| 4 | 0 | 0 | 0 | 5 |
| 1 | 0 | 0 | 1 | 2 |
| 1 | 0 | 0 | 0 | 3 |
| 1 | 0 | 0 | 0 | 3 |
| 2 | 0 | 0 | 0 | 3 |
| 2 | 0 | 0 | 0 | 3 |
| 2 | 0 | 0 | 0 | 3 |
| 2 | 0 | 0 | 0 | 3 |
| 1 | 0 | 0 | 1 | 1 |
| 1 | 0 | 0 | 0 | 1 |
| 1 | 0 | 0 | 0 | 1 |
| 0 | 0 | 0 | 0 | 1 |
| 2 | 0 | 0 | 0 | 5 |
| 0 | 0 | 0 | 2 | 1 |
| 0 | 0 | 0 | 0 | 0 |
| 2 | 0 | 0 | 0 | 3 |

|   |   |   |   |   |
|---|---|---|---|---|
| 1 | 0 | 0 | 0 | 2 |
| 2 | 0 | 0 | 0 | 3 |
| 0 | 0 | 1 | 0 | 2 |
| 0 | 0 | 0 | 0 | 0 |
| 0 | 0 | 0 | 0 | 1 |
| 0 | 0 | 0 | 0 | 0 |
| 0 | 1 | 0 | 1 | 0 |
| 0 | 0 | 0 | 0 | 0 |
| 0 | 0 | 0 | 0 | 0 |
| 1 | 0 | 0 | 0 | 2 |
| 1 | 0 | 0 | 0 | 2 |
| 1 | 0 | 0 | 0 | 2 |
| 1 | 0 | 0 | 0 | 2 |
| 1 | 0 | 0 | 0 | 1 |
| 1 | 0 | 0 | 0 | 1 |
| 1 | 0 | 0 | 0 | 2 |
| 1 | 0 | 0 | 0 | 3 |
| 0 | 0 | 0 | 0 | 0 |
| 2 | 0 | 0 | 0 | 2 |
| 2 | 0 | 0 | 0 | 2 |
| 1 | 0 | 0 | 1 | 2 |
| 0 | 1 | 0 | 0 | 1 |
| 1 | 0 | 0 | 0 | 3 |
| 1 | 0 | 0 | 0 | 3 |
| 1 | 0 | 0 | 0 | 3 |
| 1 | 0 | 0 | 0 | 3 |
| 1 | 0 | 0 | 0 | 3 |
| 1 | 0 | 0 | 0 | 3 |
| 1 | 0 | 0 | 0 | 3 |
| 1 | 0 | 0 | 0 | 3 |
| 1 | 0 | 0 | 0 | 3 |
| 1 | 0 | 0 | 0 | 3 |
| 1 | 0 | 0 | 0 | 3 |
| 1 | 0 | 0 | 0 | 3 |
| 1 | 0 | 0 | 0 | 3 |
| 1 | 0 | 0 | 0 | 3 |
| 1 | 0 | 0 | 0 | 3 |
| 1 | 0 | 0 | 0 | 3 |
| 1 | 0 | 0 | 0 | 3 |
| 1 | 0 | 0 | 0 | 3 |
| 1 | 0 | 0 | 0 | 3 |
| 1 | 0 | 0 | 0 | 3 |
| 1 | 0 | 0 | 0 | 3 |
| 0 | 0 | 0 | 0 | 2 |
| 2 | 0 | 0 | 0 | 2 |
| 2 | 0 | 0 | 0 | 2 |
| 1 | 0 | 0 | 0 | 1 |
| 2 | 0 | 0 | 0 | 4 |
| 2 | 0 | 0 | 0 | 3 |
| 2 | 0 | 1 | 1 | 4 |

|   |   |   |   |   |
|---|---|---|---|---|
| 2 | 0 | 0 | 0 | 5 |
| 0 | 0 | 0 | 0 | 0 |
| 1 | 0 | 0 | 0 | 1 |
| 1 | 0 | 0 | 0 | 1 |
| 1 | 0 | 0 | 0 | 1 |
| 0 | 0 | 0 | 0 | 0 |
| 0 | 0 | 0 | 0 | 0 |
| 0 | 0 | 0 | 0 | 0 |
| 2 | 0 | 0 | 0 | 2 |
| 1 | 0 | 0 | 0 | 1 |
| 1 | 0 | 0 | 0 | 2 |
| 1 | 0 | 0 | 2 | 4 |
| 1 | 0 | 0 | 0 | 1 |
| 0 | 0 | 0 | 0 | 0 |
| 0 | 0 | 0 | 0 | 0 |
| 0 | 1 | 0 | 0 | 0 |
| 0 | 1 | 0 | 0 | 0 |
| 1 | 0 | 0 | 0 | 3 |
| 1 | 0 | 0 | 0 | 1 |
| 1 | 0 | 0 | 0 | 1 |
| 0 | 0 | 0 | 2 | 1 |
| 0 | 0 | 0 | 2 | 1 |
| 1 | 0 | 0 | 1 | 2 |
| 1 | 0 | 0 | 1 | 2 |
| 1 | 0 | 0 | 0 | 2 |
| 0 | 0 | 0 | 0 | 0 |
| 1 | 0 | 0 | 1 | 0 |
| 2 | 0 | 0 | 1 | 1 |
| 0 | 0 | 0 | 0 | 1 |
| 0 | 0 | 0 | 0 | 2 |
| 0 | 0 | 0 | 1 | 0 |
| 0 | 0 | 0 | 1 | 0 |
| 0 | 0 | 0 | 0 | 2 |
| 0 | 0 | 0 | 0 | 1 |
| 2 | 0 | 0 | 0 | 2 |
| 0 | 1 | 0 | 1 | 0 |
| 4 | 0 | 0 | 1 | 4 |
| 1 | 0 | 0 | 0 | 1 |
| 2 | 0 | 0 | 0 | 2 |
| 0 | 0 | 0 | 0 | 0 |
| 0 | 0 | 0 | 0 | 0 |



|   |   |   |   |   |
|---|---|---|---|---|
| 1 | 0 | 0 | 0 | 3 |
| 0 | 0 | 0 | 0 | 0 |
| 0 | 0 | 0 | 0 | 0 |
| 0 | 0 | 0 | 0 | 0 |
| 2 | 0 | 0 | 0 | 2 |
| 1 | 0 | 0 | 0 | 1 |
| 2 | 0 | 0 | 0 | 2 |
| 0 | 0 | 0 | 0 | 0 |
| 0 | 0 | 0 | 0 | 0 |
| 0 | 0 | 0 | 2 | 1 |
| 0 | 0 | 0 | 2 | 1 |
| 0 | 0 | 0 | 0 | 0 |
| 0 | 0 | 0 | 0 | 0 |
| 1 | 0 | 0 | 0 | 1 |
| 1 | 0 | 0 | 0 | 3 |
| 0 | 0 | 0 | 0 | 0 |
| 1 | 0 | 0 | 0 | 1 |
| 1 | 0 | 0 | 0 | 1 |
| 0 | 0 | 0 | 0 | 1 |
| 0 | 0 | 0 | 0 | 0 |
| 1 | 0 | 0 | 0 | 2 |
| 2 | 0 | 0 | 0 | 3 |
| 0 | 2 | 0 | 0 | 1 |
| 0 | 0 | 0 | 0 | 1 |
| 0 | 0 | 0 | 0 | 0 |
| 0 | 0 | 0 | 0 | 0 |
| 0 | 0 | 0 | 0 | 0 |
| 0 | 0 | 0 | 2 | 1 |
| 2 | 0 | 0 | 0 | 3 |
| 2 | 0 | 0 | 0 | 3 |
| 2 | 0 | 0 | 0 | 3 |
| 2 | 0 | 0 | 1 | 3 |
| 2 | 0 | 0 | 1 | 4 |
| 1 | 0 | 0 | 0 | 1 |
| 0 | 0 | 0 | 0 | 0 |
| 0 | 0 | 0 | 0 | 0 |
| 0 | 0 | 0 | 0 | 0 |
| 1 | 0 | 0 | 0 | 1 |
| 1 | 0 | 0 | 0 | 1 |
| 1 | 0 | 0 | 0 | 1 |
| 0 | 0 | 0 | 0 | 0 |

|   |   |   |   |   |
|---|---|---|---|---|
| 0 | 0 | 0 | 0 | 0 |
| 0 | 0 | 0 | 0 | 0 |
| 0 | 0 | 0 | 0 | 0 |
| 1 | 0 | 0 | 0 | 1 |
| 1 | 0 | 0 | 0 | 1 |
| 0 | 0 | 0 | 0 | 0 |
| 0 | 0 | 0 | 0 | 0 |
| 2 | 0 | 0 | 0 | 6 |
| 0 | 0 | 0 | 0 | 0 |
| 1 | 0 | 0 | 0 | 1 |
| 0 | 0 | 0 | 0 | 0 |
| 0 | 0 | 0 | 0 | 0 |
| 0 | 0 | 0 | 0 | 0 |
| 1 | 0 | 0 | 0 | 1 |
| 0 | 0 | 0 | 0 | 0 |
| 0 | 0 | 0 | 0 | 0 |
| 1 | 0 | 0 | 0 | 2 |
| 2 | 0 | 0 | 0 | 3 |
| 2 | 0 | 0 | 0 | 3 |
| 2 | 0 | 0 | 0 | 2 |
| 2 | 0 | 0 | 0 | 2 |
| 0 | 0 | 0 | 0 | 0 |
| 1 | 0 | 0 | 0 | 1 |
| 1 | 0 | 0 | 0 | 1 |
| 1 | 0 | 0 | 0 | 1 |
| 0 | 0 | 0 | 0 | 0 |
| 1 | 0 | 0 | 0 | 1 |
| 1 | 0 | 0 | 0 | 1 |
| 1 | 0 | 0 | 0 | 2 |
| 1 | 0 | 0 | 0 | 3 |
| 1 | 0 | 0 | 0 | 2 |
| 1 | 0 | 0 | 0 | 3 |
| 2 | 0 | 0 | 0 | 4 |
| 1 | 0 | 0 | 0 | 1 |
| 1 | 0 | 0 | 0 | 1 |
| 1 | 0 | 0 | 0 | 1 |
| 1 | 0 | 0 | 0 | 1 |
| 0 | 0 | 0 | 0 | 0 |
| 1 | 0 | 0 | 0 | 1 |
| 0 | 0 | 0 | 0 | 0 |
| 0 | 0 | 0 | 0 | 1 |

|   |   |   |   |   |
|---|---|---|---|---|
| 2 | 0 | 0 | 0 | 4 |
| 2 | 0 | 0 | 0 | 4 |
| 1 | 0 | 0 | 0 | 1 |
| 1 | 0 | 0 | 0 | 1 |
| 1 | 0 | 0 | 0 | 1 |
| 0 | 0 | 0 | 0 | 1 |
| 1 | 0 | 0 | 1 | 1 |
| 1 | 0 | 0 | 0 | 1 |
| 0 | 0 | 0 | 0 | 0 |
| 1 | 0 | 0 | 0 | 1 |
| 0 | 0 | 0 | 0 | 0 |
| 0 | 0 | 0 | 0 | 0 |
| 1 | 0 | 0 | 0 | 1 |
| 1 | 0 | 0 | 0 | 1 |
| 2 | 0 | 0 | 0 | 3 |
| 1 | 1 | 0 | 0 | 1 |
| 1 | 1 | 0 | 0 | 1 |
| 2 | 0 | 0 | 0 | 2 |
| 2 | 0 | 0 | 0 | 2 |
| 2 | 1 | 0 | 0 | 3 |
| 2 | 1 | 0 | 0 | 3 |
| 2 | 0 | 0 | 0 | 2 |
| 1 | 0 | 1 | 1 | 2 |
| 0 | 0 | 0 | 0 | 0 |
| 0 | 1 | 0 | 1 | 0 |
| 1 | 0 | 0 | 0 | 1 |
| 0 | 0 | 0 | 2 | 2 |
| 1 | 0 | 0 | 0 | 1 |
| 0 | 0 | 0 | 0 | 0 |
| 1 | 0 | 0 | 0 | 1 |
| 0 | 0 | 0 | 0 | 0 |
| 0 | 0 | 0 | 0 | 1 |
| 1 | 0 | 0 | 0 | 1 |
| 1 | 1 | 0 | 0 | 3 |
| 1 | 0 | 0 | 1 | 2 |
| 1 | 0 | 0 | 0 | 1 |
| 1 | 0 | 0 | 0 | 1 |
| 0 | 0 | 0 | 0 | 0 |
| 2 | 0 | 0 | 0 | 2 |



|   |   |   |   |   |
|---|---|---|---|---|
| 1 | 0 | 0 | 0 | 1 |
| 1 | 0 | 0 | 0 | 2 |
| 1 | 0 | 0 | 0 | 1 |
| 1 | 0 | 0 | 0 | 1 |
| 0 | 0 | 0 | 0 | 0 |
| 1 | 0 | 0 | 0 | 1 |
| 2 | 0 | 0 | 0 | 3 |
| 1 | 0 | 0 | 0 | 3 |
| 1 | 0 | 0 | 0 | 2 |
| 1 | 0 | 0 | 0 | 1 |
| 0 | 1 | 0 | 0 | 1 |
| 1 | 0 | 0 | 0 | 1 |
| 2 | 0 | 0 | 0 | 3 |
| 1 | 0 | 0 | 0 | 2 |
| 0 | 0 | 0 | 0 | 0 |
| 1 | 0 | 0 | 0 | 1 |
| 1 | 0 | 0 | 0 | 1 |
| 1 | 0 | 0 | 0 | 4 |
| 2 | 0 | 0 | 0 | 4 |
| 0 | 0 | 0 | 0 | 1 |
| 1 | 0 | 0 | 0 | 1 |
| 1 | 0 | 0 | 0 | 1 |
| 2 | 0 | 0 | 0 | 2 |
| 1 | 0 | 0 | 1 | 1 |
| 0 | 0 | 0 | 0 | 1 |
| 1 | 0 | 0 | 0 | 2 |
| 1 | 0 | 0 | 0 | 2 |
| 1 | 0 | 0 | 0 | 3 |
| 1 | 0 | 0 | 0 | 3 |
| 1 | 0 | 0 | 0 | 2 |
| 2 | 0 | 0 | 0 | 3 |
| 1 | 0 | 0 | 1 | 2 |
| 1 | 0 | 0 | 1 | 2 |
| 1 | 0 | 0 | 0 | 3 |
| 2 | 0 | 0 | 0 | 3 |
| 1 | 0 | 0 | 0 | 3 |
| 1 | 0 | 0 | 0 | 3 |
| 1 | 1 | 0 | 0 | 3 |
| 1 | 0 | 0 | 0 | 3 |
| 1 | 1 | 0 | 0 | 3 |
| 1 | 0 | 0 | 0 | 3 |

|   |   |   |   |   |
|---|---|---|---|---|
| 1 | 0 | 0 | 0 | 3 |
| 1 | 0 | 0 | 0 | 3 |
| 1 | 0 | 0 | 0 | 3 |
| 1 | 0 | 0 | 0 | 3 |
| 1 | 0 | 0 | 0 | 3 |
| 1 | 0 | 0 | 0 | 3 |
| 1 | 0 | 0 | 0 | 1 |
| 1 | 0 | 0 | 0 | 1 |
| 0 | 0 | 0 | 0 | 1 |
| 1 | 0 | 0 | 0 | 1 |
| 0 | 1 | 0 | 1 | 0 |
| 0 | 0 | 0 | 0 | 1 |
| 0 | 0 | 0 | 1 | 0 |
| 0 | 0 | 0 | 0 | 2 |
| 1 | 0 | 0 | 0 | 5 |
| 1 | 0 | 0 | 1 | 2 |
| 0 | 0 | 0 | 2 | 1 |
| 0 | 0 | 1 | 0 | 2 |
| 0 | 0 | 1 | 0 | 4 |
| 0 | 1 | 0 | 1 | 1 |
| 0 | 0 | 0 | 0 | 2 |
| 0 | 0 | 0 | 1 | 0 |
| 0 | 1 | 0 | 1 | 0 |
| 0 | 0 | 0 | 0 | 0 |
| 0 | 0 | 0 | 0 | 1 |
| 0 | 0 | 0 | 0 | 0 |
| 0 | 0 | 1 | 0 | 2 |
| 1 | 0 | 0 | 0 | 1 |
| 0 | 0 | 0 | 0 | 1 |
| 0 | 0 | 1 | 0 | 2 |
| 0 | 0 | 0 | 0 | 2 |
| 1 | 0 | 0 | 0 | 4 |
| 0 | 0 | 0 | 0 | 1 |
| 0 | 0 | 0 | 0 | 1 |
| 0 | 1 | 0 | 1 | 0 |
| 0 | 0 | 1 | 0 | 2 |
| 0 | 0 | 1 | 0 | 4 |
| 2 | 0 | 0 | 0 | 2 |
| 1 | 0 | 0 | 0 | 1 |
| 1 | 0 | 0 | 2 | 1 |
| 0 | 0 | 0 | 0 | 1 |

|   |   |   |   |   |
|---|---|---|---|---|
| 2 | 0 | 0 | 0 | 2 |
| 2 | 0 | 0 | 0 | 2 |
| 2 | 0 | 0 | 0 | 2 |
| 0 | 1 | 0 | 0 | 2 |
| 0 | 1 | 0 | 1 | 0 |
| 1 | 0 | 0 | 0 | 1 |
| 1 | 0 | 0 | 0 | 1 |
| 2 | 0 | 0 | 0 | 2 |
| 2 | 0 | 0 | 0 | 2 |
| 1 | 0 | 0 | 0 | 1 |
| 1 | 0 | 0 | 0 | 1 |
| 1 | 0 | 0 | 0 | 1 |
| 1 | 0 | 0 | 1 | 2 |
| 0 | 1 | 1 | 0 | 0 |
| 0 | 0 | 1 | 0 | 0 |
| 0 | 0 | 0 | 2 | 1 |
| 0 | 0 | 0 | 0 | 1 |
| 0 | 0 | 0 | 0 | 2 |
| 1 | 0 | 0 | 2 | 4 |
| 0 | 0 | 0 | 0 | 1 |
| 0 | 0 | 0 | 0 | 1 |
| 0 | 0 | 1 | 0 | 2 |
| 0 | 0 | 0 | 0 | 2 |
| 1 | 0 | 0 | 0 | 2 |
| 1 | 0 | 0 | 1 | 2 |
| 1 | 0 | 0 | 0 | 3 |
| 1 | 0 | 0 | 0 | 5 |
| 0 | 1 | 0 | 0 | 2 |
| 0 | 0 | 0 | 2 | 1 |
| 1 | 0 | 0 | 0 | 2 |
| 1 | 0 | 0 | 0 | 2 |
| 1 | 0 | 0 | 0 | 2 |
| 1 | 0 | 0 | 0 | 2 |
| 1 | 0 | 0 | 0 | 2 |
| 1 | 0 | 0 | 0 | 2 |
| 1 | 0 | 0 | 0 | 2 |
| 1 | 0 | 0 | 0 | 2 |
| 1 | 0 | 0 | 0 | 4 |
| 1 | 0 | 0 | 1 | 2 |
| 1 | 0 | 1 | 1 | 2 |
| 1 | 0 | 1 | 1 | 2 |
| 1 | 0 | 1 | 1 | 2 |
| 1 | 0 | 0 | 0 | 2 |

|   |   |   |   |   |
|---|---|---|---|---|
| 1 | 0 | 0 | 0 | 2 |
| 1 | 0 | 0 | 0 | 2 |
| 1 | 0 | 0 | 0 | 2 |
| 1 | 0 | 0 | 1 | 2 |
| 1 | 0 | 0 | 1 | 2 |
| 2 | 0 | 0 | 0 | 3 |
| 1 | 0 | 0 | 1 | 2 |
| 1 | 0 | 0 | 0 | 1 |
| 1 | 0 | 0 | 0 | 1 |
| 0 | 0 | 0 | 0 | 1 |
| 1 | 0 | 0 | 0 | 1 |
| 1 | 0 | 0 | 1 | 2 |
| 1 | 0 | 0 | 1 | 1 |
| 1 | 0 | 0 | 0 | 1 |
| 2 | 0 | 0 | 0 | 2 |
| 2 | 0 | 0 | 0 | 2 |
| 2 | 0 | 0 | 0 | 3 |
| 2 | 0 | 0 | 0 | 3 |
| 2 | 0 | 0 | 0 | 3 |
| 2 | 0 | 0 | 0 | 3 |
| 2 | 0 | 0 | 0 | 3 |
| 1 | 0 | 0 | 0 | 2 |
| 1 | 0 | 0 | 0 | 4 |
| 1 | 0 | 1 | 1 | 2 |
| 1 | 0 | 1 | 1 | 2 |
| 1 | 0 | 0 | 1 | 2 |
| 1 | 0 | 0 | 0 | 3 |
| 1 | 0 | 0 | 1 | 2 |
| 1 | 0 | 0 | 0 | 3 |
| 1 | 0 | 0 | 0 | 3 |
| 2 | 0 | 0 | 0 | 3 |
| 2 | 0 | 0 | 0 | 3 |
| 2 | 0 | 0 | 0 | 3 |
| 2 | 0 | 0 | 0 | 3 |
| 1 | 0 | 0 | 1 | 1 |
| 1 | 0 | 0 | 0 | 1 |
| 1 | 0 | 0 | 0 | 1 |
| 0 | 0 | 0 | 0 | 1 |
| 0 | 0 | 0 | 2 | 1 |
| 2 | 0 | 0 | 0 | 3 |
| 0 | 0 | 1 | 0 | 2 |



|   |   |   |   |   |
|---|---|---|---|---|
| 0 | 0 | 0 | 0 | 0 |
| 0 | 0 | 0 | 0 | 1 |
| 0 | 0 | 0 | 0 | 0 |
| 0 | 1 | 0 | 1 | 0 |
| 0 | 0 | 0 | 0 | 0 |
| 0 | 0 | 0 | 0 | 0 |
| 1 | 0 | 0 | 0 | 2 |
| 1 | 0 | 0 | 0 | 2 |
| 1 | 0 | 0 | 0 | 2 |
| 1 | 0 | 0 | 0 | 2 |
| 1 | 0 | 0 | 0 | 1 |
| 1 | 0 | 0 | 0 | 1 |
| 1 | 0 | 0 | 0 | 3 |
| 0 | 0 | 0 | 0 | 0 |
| 2 | 0 | 0 | 0 | 2 |
| 2 | 0 | 0 | 0 | 2 |
| 1 | 0 | 0 | 1 | 2 |
| 0 | 1 | 0 | 0 | 1 |
| 1 | 0 | 0 | 0 | 3 |
| 1 | 0 | 0 | 0 | 3 |
| 1 | 0 | 0 | 0 | 3 |
| 1 | 0 | 0 | 0 | 3 |
| 1 | 0 | 0 | 0 | 3 |
| 1 | 0 | 0 | 0 | 3 |
| 1 | 0 | 0 | 0 | 3 |
| 1 | 0 | 0 | 0 | 3 |
| 1 | 0 | 0 | 0 | 3 |
| 1 | 0 | 0 | 0 | 3 |
| 1 | 0 | 0 | 0 | 3 |
| 1 | 0 | 0 | 0 | 3 |
| 1 | 0 | 0 | 0 | 3 |
| 1 | 0 | 0 | 0 | 3 |
| 1 | 0 | 0 | 0 | 3 |
| 1 | 0 | 0 | 0 | 3 |
| 1 | 0 | 0 | 0 | 3 |
| 0 | 0 | 0 | 0 | 2 |
| 2 | 0 | 0 | 0 | 2 |
| 2 | 0 | 0 | 0 | 3 |
| 2 | 0 | 1 | 1 | 4 |
| 2 | 0 | 0 | 0 | 5 |
| 1 | 0 | 0 | 0 | 1 |
| 1 | 0 | 0 | 0 | 1 |
| 1 | 0 | 0 | 0 | 1 |
| 2 | 0 | 0 | 0 | 2 |
| 1 | 0 | 0 | 0 | 1 |
| 1 | 0 | 0 | 0 | 2 |

|   |   |   |   |   |
|---|---|---|---|---|
| 1 | 0 | 0 | 2 | 4 |
| 1 | 0 | 0 | 0 | 1 |
| 1 | 0 | 0 | 0 | 3 |
| 1 | 0 | 0 | 0 | 1 |
| 1 | 0 | 0 | 0 | 1 |
| 0 | 0 | 0 | 2 | 1 |
| 1 | 0 | 0 | 1 | 2 |
| 1 | 0 | 0 | 1 | 2 |
| 1 | 0 | 0 | 0 | 2 |
| 2 | 0 | 0 | 1 | 1 |
| 0 | 0 | 0 | 0 | 1 |
| 0 | 0 | 0 | 0 | 2 |
| 0 | 0 | 0 | 1 | 0 |
| 0 | 0 | 0 | 0 | 2 |
| 0 | 0 | 0 | 0 | 1 |
| 2 | 0 | 0 | 0 | 2 |
| 0 | 1 | 0 | 1 | 0 |
| 1 | 0 | 0 | 0 | 1 |
| 2 | 0 | 0 | 0 | 2 |
| 0 | 0 | 0 | 0 | 0 |
| 1 | 0 | 0 | 0 | 3 |
| 0 | 0 | 0 | 0 | 0 |
| 1 | 0 | 0 | 0 | 1 |
| 2 | 0 | 0 | 0 | 2 |
| 1 | 0 | 0 | 0 | 1 |
| 1 | 0 | 0 | 0 | 3 |
| 1 | 0 | 0 | 0 | 1 |
| 1 | 0 | 0 | 0 | 1 |
| 0 | 0 | 0 | 0 | 1 |
| 1 | 0 | 0 | 0 | 2 |
| 0 | 2 | 0 | 0 | 1 |
| 0 | 0 | 0 | 0 | 1 |
| 0 | 0 | 0 | 0 | 0 |
| 0 | 0 | 0 | 0 | 0 |
| 0 | 0 | 0 | 2 | 1 |
| 2 | 0 | 0 | 0 | 3 |
| 2 | 0 | 0 | 0 | 3 |
| 2 | 0 | 0 | 1 | 3 |
| 2 | 0 | 0 | 1 | 4 |
| 1 | 0 | 0 | 0 | 1 |
| 1 | 0 | 0 | 0 | 1 |

|   |   |   |   |   |
|---|---|---|---|---|
| 1 | 0 | 0 | 0 | 1 |
| 2 | 0 | 0 | 0 | 6 |
| 1 | 0 | 0 | 0 | 1 |
| 0 | 0 | 0 | 0 | 0 |
| 0 | 0 | 0 | 0 | 0 |
| 0 | 0 | 0 | 0 | 0 |
| 1 | 0 | 0 | 0 | 2 |
| 2 | 0 | 0 | 0 | 3 |
| 2 | 0 | 0 | 0 | 3 |
| 2 | 0 | 0 | 0 | 2 |
| 2 | 0 | 0 | 0 | 2 |
| 0 | 0 | 0 | 0 | 0 |
| 1 | 0 | 0 | 0 | 1 |
| 1 | 0 | 0 | 0 | 1 |
| 1 | 0 | 0 | 0 | 1 |
| 0 | 0 | 0 | 0 | 0 |
| 1 | 0 | 0 | 0 | 1 |
| 1 | 0 | 0 | 0 | 1 |
| 1 | 0 | 0 | 0 | 2 |
| 1 | 0 | 0 | 0 | 3 |
| 1 | 0 | 0 | 0 | 2 |
| 1 | 0 | 0 | 0 | 3 |
| 1 | 0 | 0 | 0 | 1 |
| 1 | 0 | 0 | 0 | 1 |
| 1 | 0 | 0 | 0 | 1 |
| 1 | 0 | 0 | 0 | 1 |
| 1 | 0 | 0 | 0 | 1 |
| 1 | 0 | 0 | 0 | 1 |
| 1 | 0 | 0 | 0 | 1 |
| 1 | 0 | 0 | 0 | 1 |
| 1 | 0 | 0 | 0 | 1 |
| 0 | 0 | 0 | 0 | 1 |
| 2 | 0 | 0 | 0 | 4 |
| 2 | 0 | 0 | 0 | 4 |
| 1 | 0 | 0 | 0 | 1 |
| 1 | 0 | 0 | 0 | 1 |
| 1 | 0 | 0 | 1 | 1 |
| 1 | 0 | 0 | 0 | 1 |
| 1 | 0 | 0 | 0 | 1 |
| 1 | 1 | 0 | 0 | 1 |
| 1 | 1 | 0 | 0 | 1 |
| 2 | 0 | 0 | 0 | 2 |
| 2 | 0 | 0 | 0 | 2 |
| 2 | 1 | 0 | 0 | 3 |
| 2 | 1 | 0 | 0 | 3 |

|             |                                                                                     |         |         |         |
|-------------|-------------------------------------------------------------------------------------|---------|---------|---------|
| 2           | 1                                                                                   | 0       | 0       | 3       |
| 2           | 0                                                                                   | 0       | 0       | 2       |
| 0           | 0                                                                                   | 0       | 0       | 0       |
| 0           | 1                                                                                   | 0       | 1       | 0       |
| 0           | 0                                                                                   | 0       | 2       | 2       |
| 1           | 0                                                                                   | 0       | 0       | 1       |
| 0           | 0                                                                                   | 0       | 0       | 0       |
| 1           | 0                                                                                   | 0       | 0       | 1       |
| 0           | 0                                                                                   | 0       | 0       | 1       |
| 1           | 0                                                                                   | 0       | 0       | 1       |
| 1           | 1                                                                                   | 0       | 0       | 3       |
| 1           | 0                                                                                   | 0       | 1       | 2       |
| 1           | 0                                                                                   | 0       | 0       | 1       |
| 1           | 0                                                                                   | 0       | 0       | 1       |
| 0           | 0                                                                                   | 0       | 0       | 0       |
| 2           | 0                                                                                   | 0       | 0       | 2       |
| 2           | 0                                                                                   | 0       | 0       | 2       |
| 0           | 0                                                                                   | 0       | 0       | 1       |
| 0           | 0                                                                                   | 0       | 0       | 0       |
| 0           | 0                                                                                   | 0       | 0       | 2       |
| 0           | 0                                                                                   | 1       | 0       | 2       |
|             |                                                                                     |         |         |         |
|             | <b>Metabolites after MDS using ADMET (112) (used for HCA and Scaffold analysis)</b> |         |         |         |
| nAromBlocks | nRings3                                                                             | nRings4 | nRings5 | nRings6 |
|             |                                                                                     |         |         |         |
| 1           | 0                                                                                   | 0       | 0       | 1       |
| 1           | 0                                                                                   | 0       | 0       | 3       |
| 1           | 0                                                                                   | 0       | 0       | 3       |
| 1           | 0                                                                                   | 0       | 0       | 2       |
| 1           | 0                                                                                   | 0       | 0       | 1       |
| 2           | 0                                                                                   | 0       | 0       | 3       |
| 1           | 0                                                                                   | 0       | 0       | 2       |
| 1           | 0                                                                                   | 0       | 0       | 1       |
| 2           | 0                                                                                   | 0       | 0       | 3       |
| 0           | 0                                                                                   | 0       | 0       | 1       |
| 1           | 0                                                                                   | 0       | 0       | 2       |
| 1           | 0                                                                                   | 0       | 0       | 3       |
| 1           | 0                                                                                   | 0       | 0       | 3       |
| 1           | 0                                                                                   | 0       | 0       | 2       |
| 2           | 0                                                                                   | 0       | 0       | 3       |

|   |   |   |   |   |
|---|---|---|---|---|
| 1 | 0 | 0 | 1 | 2 |
| 1 | 0 | 0 | 1 | 2 |
| 1 | 0 | 0 | 0 | 3 |
| 1 | 0 | 0 | 0 | 3 |
| 1 | 1 | 0 | 0 | 3 |
| 1 | 1 | 0 | 0 | 3 |
| 1 | 0 | 0 | 0 | 3 |
| 1 | 0 | 0 | 0 | 3 |
| 1 | 0 | 0 | 0 | 3 |
| 1 | 0 | 0 | 0 | 3 |
| 1 | 0 | 0 | 0 | 3 |
| 1 | 0 | 0 | 0 | 3 |
| 1 | 0 | 0 | 0 | 1 |
| 1 | 0 | 0 | 1 | 2 |
| 2 | 0 | 0 | 0 | 2 |
| 1 | 0 | 0 | 2 | 1 |
| 1 | 0 | 0 | 1 | 2 |
| 1 | 0 | 0 | 0 | 2 |
| 1 | 0 | 0 | 1 | 2 |
| 1 | 0 | 0 | 0 | 3 |
| 1 | 0 | 0 | 0 | 2 |
| 1 | 0 | 0 | 0 | 2 |
| 1 | 0 | 0 | 0 | 2 |
| 1 | 0 | 0 | 0 | 2 |
| 1 | 0 | 0 | 0 | 2 |
| 1 | 0 | 0 | 0 | 2 |
| 1 | 0 | 0 | 0 | 2 |
| 1 | 0 | 0 | 1 | 2 |
| 1 | 0 | 1 | 1 | 2 |
| 1 | 0 | 1 | 1 | 2 |
| 1 | 0 | 0 | 0 | 2 |
| 1 | 0 | 0 | 0 | 2 |
| 1 | 0 | 0 | 0 | 2 |
| 1 | 0 | 0 | 0 | 2 |
| 1 | 0 | 0 | 0 | 2 |
| 1 | 0 | 0 | 1 | 2 |
| 1 | 0 | 0 | 1 | 2 |
| 1 | 0 | 0 | 1 | 2 |
| 2 | 0 | 0 | 0 | 2 |
| 2 | 0 | 0 | 0 | 2 |
| 2 | 0 | 0 | 0 | 3 |
| 2 | 0 | 0 | 0 | 3 |
| 2 | 0 | 0 | 0 | 3 |
| 2 | 0 | 0 | 0 | 3 |
| 2 | 0 | 0 | 0 | 3 |

|   |   |   |   |   |
|---|---|---|---|---|
| 1 | 0 | 0 | 0 | 2 |
| 1 | 0 | 1 | 1 | 2 |
| 1 | 0 | 1 | 1 | 2 |
| 1 | 0 | 0 | 1 | 2 |
| 1 | 0 | 0 | 1 | 2 |
| 1 | 0 | 0 | 0 | 3 |
| 2 | 0 | 0 | 0 | 3 |
| 1 | 0 | 0 | 1 | 1 |
| 1 | 0 | 0 | 0 | 2 |
| 1 | 0 | 0 | 0 | 2 |
| 1 | 0 | 0 | 0 | 2 |
| 1 | 0 | 0 | 0 | 2 |
| 1 | 0 | 0 | 0 | 1 |
| 1 | 0 | 0 | 0 | 3 |
| 2 | 0 | 0 | 0 | 2 |
| 1 | 0 | 0 | 1 | 2 |
| 1 | 0 | 0 | 0 | 3 |
| 1 | 0 | 0 | 0 | 3 |
| 1 | 0 | 0 | 0 | 3 |
| 1 | 0 | 0 | 0 | 3 |
| 1 | 0 | 0 | 0 | 3 |
| 1 | 0 | 0 | 0 | 3 |
| 1 | 0 | 0 | 0 | 3 |
| 1 | 0 | 0 | 0 | 3 |
| 1 | 0 | 0 | 0 | 3 |
| 1 | 0 | 0 | 0 | 3 |
| 1 | 0 | 0 | 0 | 3 |
| 1 | 0 | 0 | 0 | 3 |
| 1 | 0 | 0 | 0 | 3 |
| 1 | 0 | 0 | 0 | 3 |
| 1 | 0 | 0 | 1 | 2 |
| 1 | 0 | 0 | 1 | 2 |
| 1 | 0 | 0 | 0 | 2 |
| 2 | 0 | 0 | 0 | 2 |
| 1 | 0 | 0 | 0 | 3 |
| 2 | 0 | 0 | 0 | 2 |
| 1 | 0 | 0 | 0 | 3 |
| 2 | 0 | 0 | 0 | 3 |
| 2 | 0 | 0 | 0 | 3 |
| 2 | 0 | 0 | 1 | 3 |
| 2 | 0 | 0 | 1 | 4 |
| 1 | 0 | 0 | 0 | 2 |
| 2 | 0 | 0 | 0 | 3 |

|                |                                                             |           |           |              |
|----------------|-------------------------------------------------------------|-----------|-----------|--------------|
| 2              | 0                                                           | 0         | 0         | 3            |
| 1              | 0                                                           | 0         | 0         | 2            |
| 1              | 0                                                           | 0         | 0         | 2            |
| 2              | 0                                                           | 0         | 0         | 4            |
| 2              | 0                                                           | 0         | 0         | 4            |
| 1              | 0                                                           | 0         | 0         | 1            |
| 1              | 1                                                           | 0         | 0         | 1            |
| 2              | 0                                                           | 0         | 0         | 2            |
| 2              | 0                                                           | 0         | 0         | 2            |
| 2              | 1                                                           | 0         | 0         | 3            |
| 2              | 1                                                           | 0         | 0         | 3            |
| 2              | 0                                                           | 0         | 0         | 2            |
| 1              | 1                                                           | 0         | 0         | 3            |
| 1              | 0                                                           | 0         | 1         | 2            |
| 1              | 0                                                           | 0         | 0         | 1            |
|                |                                                             |           |           |              |
|                | <b>468 Metabolites and positive &amp; negative controls</b> |           |           |              |
| <b>nRings7</b> | <b>TopoPSA</b>                                              | <b>MW</b> | <b>nB</b> | <b>nBase</b> |
|                |                                                             |           |           |              |
| 0              | 68.23                                                       | 453.2515  | 38        | 1            |
| 0              | 29.54                                                       | 287.1885  | 22        | 1            |
| 0              | 55.56                                                       | 352.2151  | 28        | 1            |
| 0              | 38.77                                                       | 367.2147  | 29        | 1            |
| 0              | 29.54                                                       | 275.1885  | 21        | 1            |
| 0              | 71.03                                                       | 492.2525  | 41        | 1            |
| 0              | 23.55                                                       | 350.2358  | 28        | 1            |
| 0              | 49.85                                                       | 394.2256  | 31        | 1            |
| 0              | 64.2                                                        | 386.151   | 29        | 1            |
| 1              | 55.84                                                       | 303.1471  | 24        | 1            |
| 0              | 41.93                                                       | 299.1521  | 26        | 1            |
| 0              | 80.59                                                       | 372.1685  | 31        | 1            |
| 0              | 32.7                                                        | 271.1572  | 24        | 1            |
| 0              | 32.78                                                       | 392.2464  | 32        | 1            |
| 0              | 23.55                                                       | 324.2202  | 25        | 1            |
| 0              | 59.72                                                       | 291.1115  | 20        | 1            |
| 0              | 64.33                                                       | 424.2151  | 35        | 1            |
| 0              | 20.23                                                       | 46.04186  | 2         | 0            |
| 0              | 59.72                                                       | 277.0959  | 19        | 1            |
| 0              | 73.43                                                       | 396.2161  | 31        | 1            |
| 0              | 62.16                                                       | 411.241   | 35        | 1            |

|   |       |          |    |   |
|---|-------|----------|----|---|
| 0 | 23.55 | 336.2202 | 27 | 1 |
| 0 | 65.07 | 369.1576 | 31 | 1 |
| 0 | 38.77 | 299.1521 | 26 | 1 |
| 0 | 49.77 | 285.1365 | 25 | 1 |
| 0 | 20.31 | 309.2093 | 24 | 1 |
| 0 | 40.54 | 247.1572 | 19 | 1 |
| 0 | 32.78 | 392.2464 | 32 | 1 |
| 0 | 29.54 | 247.1572 | 19 | 1 |
| 0 | 52.93 | 285.1365 | 25 | 1 |
| 0 | 72.75 | 301.1314 | 26 | 1 |
| 0 | 59    | 315.1471 | 27 | 1 |
| 0 | 70    | 301.1314 | 26 | 1 |
| 0 | 36.44 | 275.1998 | 21 | 1 |
| 0 | 29.54 | 353.2355 | 27 | 1 |
| 0 | 32.34 | 328.1109 | 22 | 1 |
| 0 | 29.54 | 275.1885 | 21 | 1 |
| 0 | 29.54 | 261.1729 | 20 | 1 |
| 0 | 29.54 | 339.2198 | 26 | 1 |
| 0 | 29.54 | 351.2198 | 28 | 1 |
| 0 | 23.55 | 274.2045 | 21 | 1 |
| 0 | 23.47 | 321.2093 | 27 | 1 |
| 0 | 23.47 | 347.2249 | 30 | 1 |
| 0 | 49.77 | 367.2147 | 29 | 1 |
| 0 | 41.57 | 366.2307 | 29 | 1 |
| 0 | 73.36 | 430.2733 | 35 | 2 |
| 1 | 29.54 | 275.1885 | 21 | 1 |
| 0 | 29.54 | 261.1729 | 20 | 1 |
| 0 | 12.47 | 271.1936 | 23 | 1 |
| 0 | 59    | 321.194  | 24 | 1 |
| 0 | 76.15 | 376.1998 | 28 | 1 |
| 0 | 61.02 | 386.2028 | 29 | 1 |
| 0 | 48    | 341.1627 | 29 | 1 |
| 0 | 30.93 | 311.1521 | 27 | 1 |
| 0 | 51.79 | 342.1766 | 26 | 1 |
| 0 | 29.54 | 273.1729 | 21 | 1 |
| 0 | 29.54 | 275.1885 | 21 | 1 |
| 0 | 23.55 | 328.1109 | 22 | 1 |
| 0 | 6.48  | 348.2565 | 29 | 2 |
| 0 | 39.34 | 323.1998 | 27 | 1 |
| 0 | 30.49 | 193.1103 | 15 | 1 |
| 0 | 34.89 | 250.1106 | 21 | 0 |



|   |        |          |    |   |
|---|--------|----------|----|---|
| 0 | 53.71  | 211.1208 | 15 | 1 |
| 0 | 49.33  | 347.2824 | 24 | 0 |
| 0 | 66.76  | 378.277  | 26 | 0 |
| 0 | 49.33  | 349.2981 | 24 | 0 |
| 0 | 49.33  | 375.3137 | 26 | 0 |
| 0 | 49.69  | 364.2977 | 25 | 0 |
| 0 | 69.56  | 439.3086 | 32 | 0 |
| 0 | 69.56  | 417.3243 | 30 | 0 |
| 0 | 43.09  | 281.2719 | 19 | 0 |
| 0 | 52.32  | 347.2824 | 24 | 1 |
| 0 | 16.13  | 162.1157 | 13 | 1 |
| 0 | 40.13  | 59.0133  | 3  | 0 |
| 0 | 103.73 | 244.0882 | 17 | 0 |
| 0 | 20.23  | 104.1075 | 6  | 2 |
| 0 | 110.38 | 180.0634 | 12 | 0 |
| 0 | 103.45 | 146.0453 | 9  | 1 |
| 0 | 92     | 155.0695 | 11 | 1 |
| 0 | 63.32  | 131.0946 | 8  | 1 |
| 0 | 60.36  | 89.02387 | 5  | 0 |
| 0 | 63.32  | 131.0946 | 8  | 1 |
| 0 | 89.34  | 146.1055 | 9  | 2 |
| 0 | 88.62  | 149.051  | 8  | 1 |
| 0 | 63.32  | 165.079  | 12 | 1 |
| 0 | 57.2   | 87.00822 | 5  | 0 |
| 0 | 161.56 | 376.1383 | 29 | 0 |
| 0 | 104.15 | 265.1123 | 19 | 1 |
| 0 | 79.11  | 204.0899 | 16 | 1 |
| 0 | 83.55  | 181.0739 | 13 | 1 |
| 0 | 63.32  | 117.079  | 7  | 1 |
| 0 | 29.46  | 314.2246 | 25 | 0 |
| 0 | 29.26  | 60.06875 | 3  | 0 |
| 0 | 0      | 134.1096 | 10 | 0 |
| 0 | 0      | 134.1096 | 10 | 0 |
| 0 | 116.73 | 126.0654 | 9  | 0 |
| 0 | 0      | 145.969  | 8  | 0 |
| 0 | 0      | 134.1096 | 10 | 0 |
| 0 | 20.23  | 74.07316 | 4  | 0 |
| 0 | 29.46  | 132.115  | 8  | 0 |
| 0 | 20.23  | 102.1045 | 6  | 0 |
| 0 | 20.23  | 172.1827 | 11 | 0 |
| 0 | 0      | 128.1565 | 8  | 0 |

|   |       |          |    |   |
|---|-------|----------|----|---|
| 0 | 0     | 114.1409 | 7  | 0 |
| 0 | 20.23 | 136.0888 | 10 | 0 |
| 0 | 20.23 | 206.1671 | 15 | 0 |
| 0 | 25.78 | 136.1    | 10 | 0 |
| 0 | 25.78 | 108.0687 | 8  | 0 |
| 0 | 17.07 | 72.05751 | 4  | 0 |
| 0 | 29.46 | 118.0994 | 7  | 0 |
| 0 | 17.07 | 154.0185 | 10 | 0 |
| 0 | 0     | 132.0939 | 10 | 0 |
| 0 | 29.46 | 90.06808 | 5  | 0 |
| 0 | 20.23 | 130.1358 | 8  | 0 |
| 0 | 0     | 120.0939 | 9  | 0 |
| 0 | 46.53 | 354.2195 | 28 | 0 |
| 0 | 54.37 | 330.2195 | 24 | 0 |
| 0 | 17.07 | 114.1045 | 7  | 0 |
| 0 | 37.3  | 136.0524 | 10 | 0 |
| 0 | 25.78 | 136.1    | 10 | 0 |
| 0 | 21.94 | 57.05785 | 4  | 1 |
| 0 | 0     | 142.0783 | 12 | 0 |
| 0 | 28.68 | 82.0531  | 6  | 0 |
| 0 | 26.02 | 73.08915 | 4  | 1 |
| 0 | 0     | 86.10955 | 5  | 0 |
| 0 | 43.14 | 89.04768 | 5  | 0 |
| 0 | 29.46 | 138.0681 | 10 | 0 |
| 0 | 38.33 | 193.1103 | 14 | 0 |
| 0 | 46.53 | 178.063  | 13 | 0 |
| 0 | 49.69 | 304.2038 | 24 | 0 |
| 0 | 20.23 | 136.0888 | 10 | 0 |
| 0 | 0     | 126.1409 | 8  | 0 |
| 0 | 0     | 120.0939 | 9  | 0 |
| 0 | 0     | 134.1096 | 10 | 0 |
| 0 | 49.69 | 330.2195 | 25 | 0 |
| 0 | 17.07 | 148.0888 | 11 | 0 |
| 0 | 17.07 | 134.0732 | 10 | 0 |
| 0 | 0     | 114.1409 | 7  | 0 |
| 0 | 17.07 | 96.05751 | 7  | 0 |
| 0 | 0     | 86.10955 | 5  | 0 |
| 0 | 38.33 | 207.1259 | 15 | 0 |
| 0 | 20.23 | 88.08882 | 5  | 0 |
| 0 | 68.15 | 302.1154 | 24 | 0 |
| 0 | 79.15 | 286.0841 | 23 | 0 |

|   |       |          |    |   |
|---|-------|----------|----|---|
| 0 | 55.76 | 372.2301 | 28 | 0 |
| 0 | 66.76 | 374.2457 | 27 | 0 |
| 0 | 0     | 136.1252 | 11 | 0 |
| 0 | 35.53 | 180.0786 | 13 | 0 |
| 0 | 57.15 | 316.1311 | 25 | 0 |
| 0 | 39.44 | 176.0473 | 14 | 0 |
| 0 | 0     | 156.1878 | 10 | 0 |
| 0 | 25.78 | 94.0531  | 7  | 0 |
| 0 | 29.46 | 138.0681 | 10 | 0 |
| 0 | 26.02 | 135.1048 | 10 | 1 |
| 0 | 38.91 | 94.0531  | 7  | 0 |
| 0 | 55.76 | 494.3396 | 39 | 0 |
| 0 | 55.76 | 490.3083 | 39 | 0 |
| 0 | 60.44 | 372.2301 | 27 | 0 |
| 0 | 66.76 | 374.2457 | 27 | 0 |
| 0 | 12.89 | 119.0735 | 9  | 0 |
| 0 | 66.76 | 374.2457 | 27 | 0 |
| 0 | 60.69 | 286.1569 | 22 | 0 |
| 0 | 0     | 132.0939 | 11 | 0 |
| 0 | 26.3  | 142.0994 | 10 | 0 |
| 0 | 90.29 | 362.2093 | 27 | 0 |
| 0 | 90.29 | 362.2093 | 27 | 0 |
| 0 | 83.83 | 360.1937 | 27 | 0 |
| 0 | 80.67 | 346.178  | 26 | 0 |
| 0 | 96.22 | 432.1573 | 36 | 0 |
| 0 | 90.9  | 338.1154 | 27 | 0 |
| 0 | 58.92 | 372.2301 | 29 | 0 |
| 0 | 29.46 | 312.2089 | 25 | 0 |
| 0 | 49.69 | 332.2351 | 25 | 0 |
| 0 | 49.69 | 326.1882 | 26 | 0 |
| 0 | 35.53 | 260.1412 | 21 | 0 |
| 0 | 76.74 | 372.1937 | 29 | 0 |
| 0 | 69.92 | 346.2144 | 27 | 0 |
| 0 | 86.99 | 370.178  | 29 | 0 |
| 0 | 49.69 | 326.1882 | 26 | 0 |
| 0 | 49.69 | 330.2195 | 26 | 0 |
| 0 | 46.53 | 328.2038 | 26 | 0 |
| 0 | 41.99 | 328.2038 | 27 | 0 |
| 0 | 71.06 | 330.1103 | 26 | 0 |
| 0 | 41.99 | 330.2195 | 27 | 0 |
| 0 | 49.69 | 330.2195 | 26 | 0 |

|   |       |          |    |   |
|---|-------|----------|----|---|
| 0 | 58.92 | 374.2457 | 29 | 0 |
| 0 | 49.69 | 330.2195 | 26 | 0 |
| 0 | 58.92 | 360.2301 | 28 | 0 |
| 0 | 46.53 | 328.2038 | 26 | 0 |
| 0 | 93.06 | 416.2199 | 32 | 0 |
| 0 | 93.06 | 416.2199 | 32 | 0 |
| 0 | 40.46 | 316.2402 | 23 | 0 |
| 0 | 17.07 | 44.02621 | 2  | 0 |
| 0 | 43.09 | 59.03711 | 3  | 0 |
| 0 | 37.3  | 60.02113 | 3  | 0 |
| 0 | 17.07 | 58.04186 | 3  | 0 |
| 0 | 66.76 | 374.2457 | 27 | 0 |
| 0 | 60.44 | 372.2301 | 27 | 0 |
| 0 | 17.07 | 56.02621 | 3  | 0 |
| 0 | 17.07 | 120.0575 | 9  | 0 |
| 1 | 0     | 204.1878 | 17 | 0 |
| 0 | 20.23 | 222.1984 | 16 | 0 |
| 1 | 0     | 204.1878 | 16 | 0 |
| 0 | 0     | 204.1878 | 16 | 0 |
| 0 | 55.76 | 562.4022 | 45 | 0 |
| 0 | 49.69 | 248.1412 | 20 | 0 |
| 1 | 0     | 204.1878 | 17 | 0 |
| 0 | 0     | 204.1878 | 16 | 0 |
| 0 | 0     | 204.1878 | 17 | 0 |
| 0 | 0     | 204.1878 | 17 | 0 |
| 0 | 20.23 | 222.1984 | 17 | 0 |
| 1 | 0     | 204.1878 | 16 | 0 |
| 1 | 0     | 204.1878 | 17 | 0 |
| 0 | 0     | 204.1878 | 15 | 0 |
| 0 | 20.23 | 194.1671 | 14 | 0 |
| 0 | 37.3  | 278.2246 | 19 | 0 |
| 2 | 0     | 204.1878 | 17 | 0 |
| 0 | 17.07 | 146.0732 | 11 | 0 |
| 0 | 0     | 136.1252 | 10 | 0 |
| 0 | 0     | 136.1252 | 11 | 0 |
| 0 | 0     | 204.1878 | 16 | 0 |
| 0 | 55.76 | 494.3396 | 39 | 0 |
| 0 | 0     | 136.1252 | 10 | 0 |
| 0 | 20.23 | 154.1358 | 11 | 0 |
| 0 | 0     | 136.1252 | 11 | 0 |
| 0 | 0     | 204.1878 | 16 | 0 |

|   |        |          |    |   |
|---|--------|----------|----|---|
| 0 | 0      | 204.1878 | 17 | 0 |
| 0 | 86.99  | 356.1624 | 27 | 0 |
| 0 | 77.76  | 394.2144 | 30 | 0 |
| 0 | 66.76  | 340.1675 | 26 | 0 |
| 0 | 66.76  | 408.2301 | 31 | 0 |
| 0 | 9.23   | 148.0888 | 11 | 0 |
| 0 | 46.53  | 328.2038 | 26 | 0 |
| 0 | 61.44  | 363.2886 | 27 | 2 |
| 0 | 66.76  | 302.1518 | 23 | 0 |
| 0 | 66.76  | 302.1518 | 25 | 0 |
| 0 | 90.9   | 270.0528 | 22 | 0 |
| 0 | 60.69  | 296.1412 | 23 | 0 |
| 0 | 40.46  | 280.1463 | 22 | 0 |
| 0 | 101.15 | 330.1467 | 25 | 0 |
| 0 | 80.92  | 314.1518 | 24 | 0 |
| 0 | 0      | 204.1878 | 17 | 0 |
| 1 | 0      | 204.1878 | 17 | 0 |
| 0 | 17.07  | 106.0419 | 8  | 0 |
| 0 | 23.79  | 103.0422 | 8  | 0 |
| 0 | 17.07  | 182.0732 | 15 | 0 |
| 0 | 3.24   | 239.1674 | 19 | 1 |
| 0 | 26.3   | 150.0681 | 11 | 0 |
| 0 | 20.23  | 108.0575 | 8  | 0 |
| 0 | 26.3   | 136.0524 | 10 | 0 |
| 0 | 23.79  | 117.0578 | 9  | 0 |
| 0 | 49.69  | 248.1412 | 20 | 0 |
| 0 | 12.53  | 220.1827 | 18 | 0 |
| 0 | 0      | 204.1878 | 16 | 0 |
| 1 | 0      | 204.1878 | 17 | 0 |
| 0 | 0      | 204.1878 | 15 | 0 |
| 0 | 20.23  | 222.1984 | 17 | 0 |
| 0 | 20.23  | 154.1358 | 12 | 0 |
| 0 | 55.76  | 480.324  | 39 | 0 |
| 0 | 24.92  | 136.1    | 10 | 1 |
| 0 | 17.07  | 206.1671 | 15 | 0 |
| 0 | 0      | 136.1252 | 10 | 0 |
| 0 | 0      | 136.1252 | 11 | 0 |
| 0 | 0      | 204.1878 | 16 | 0 |
| 0 | 105.45 | 814.6687 | 62 | 0 |
| 0 | 54.7   | 111.0796 | 8  | 1 |
| 0 | 63.6   | 316.1675 | 24 | 0 |

|   |        |          |    |   |
|---|--------|----------|----|---|
| 0 | 86.99  | 346.178  | 27 | 0 |
| 0 | 49.69  | 302.1882 | 24 | 0 |
| 0 | 69.92  | 332.1988 | 26 | 0 |
| 0 | 20.23  | 154.1358 | 12 | 0 |
| 0 | 55.76  | 562.4022 | 45 | 0 |
| 0 | 0      | 58.07825 | 3  | 0 |
| 0 | 26.3   | 102.0681 | 6  | 0 |
| 0 | 66.76  | 578.4335 | 44 | 0 |
| 0 | 0      | 204.1878 | 17 | 0 |
| 0 | 0      | 136.1252 | 11 | 0 |
| 0 | 63.6   | 332.1988 | 25 | 0 |
| 0 | 35.53  | 328.2038 | 26 | 0 |
| 0 | 29.46  | 314.2246 | 24 | 0 |
| 0 | 66.76  | 358.2144 | 27 | 0 |
| 0 | 29.46  | 286.1933 | 22 | 0 |
| 0 | 66.76  | 330.1831 | 25 | 0 |
| 0 | 18.46  | 314.2246 | 26 | 0 |
| 0 | 39.44  | 328.2038 | 26 | 0 |
| 0 | 29.46  | 314.2246 | 26 | 0 |
| 0 | 66.76  | 358.2144 | 29 | 0 |
| 0 | 29.46  | 286.1933 | 24 | 0 |
| 0 | 40.46  | 314.2246 | 24 | 0 |
| 0 | 77.76  | 358.2144 | 27 | 0 |
| 0 | 29.46  | 328.2402 | 25 | 0 |
| 0 | 40.46  | 258.162  | 20 | 0 |
| 0 | 40.46  | 286.1933 | 22 | 0 |
| 0 | 77.76  | 330.1831 | 25 | 0 |
| 0 | 86.99  | 374.2093 | 29 | 0 |
| 0 | 86.99  | 374.2093 | 29 | 0 |
| 0 | 49.69  | 330.2195 | 26 | 0 |
| 0 | 100.13 | 368.126  | 29 | 0 |
| 0 | 33.37  | 310.1933 | 25 | 0 |
| 0 | 40.46  | 316.2402 | 23 | 0 |
| 0 | 66.76  | 374.2457 | 27 | 0 |
| 0 | 77.76  | 360.2301 | 26 | 0 |
| 0 | 29.46  | 330.2559 | 24 | 0 |
| 0 | 34.14  | 314.2246 | 23 | 0 |
| 0 | 40.46  | 288.2089 | 21 | 0 |
| 0 | 77.76  | 332.1988 | 24 | 0 |
| 0 | 49.69  | 304.2038 | 24 | 0 |
| 0 | 77.76  | 332.1988 | 25 | 0 |

|   |        |          |    |   |
|---|--------|----------|----|---|
| 0 | 40.46  | 316.2402 | 23 | 0 |
| 0 | 77.76  | 360.2301 | 26 | 0 |
| 0 | 40.46  | 310.1933 | 24 | 0 |
| 0 | 40.46  | 282.162  | 22 | 0 |
| 0 | 18.46  | 324.2089 | 26 | 0 |
| 0 | 29.46  | 310.1933 | 25 | 0 |
| 0 | 29.46  | 268.1463 | 22 | 0 |
| 0 | 29.46  | 296.1776 | 24 | 0 |
| 0 | 66.76  | 354.1831 | 28 | 0 |
| 0 | 29.46  | 254.1307 | 21 | 0 |
| 0 | 29.46  | 258.162  | 20 | 0 |
| 0 | 66.76  | 302.1518 | 23 | 0 |
| 0 | 18.46  | 258.162  | 22 | 0 |
| 0 | 29.46  | 258.162  | 22 | 0 |
| 0 | 66.76  | 302.1518 | 25 | 0 |
| 1 | 22.37  | 306.162  | 26 | 0 |
| 0 | 69.92  | 348.2301 | 27 | 0 |
| 0 | 84.83  | 381.2991 | 28 | 2 |
| 0 | 179.58 | 594.2002 | 48 | 0 |
| 0 | 179.58 | 596.2159 | 48 | 0 |
| 0 | 168.58 | 610.2315 | 49 | 0 |
| 0 | 157.58 | 624.2472 | 50 | 0 |
| 0 | 46.53  | 246.1256 | 20 | 0 |
| 0 | 69.92  | 346.2144 | 27 | 0 |
| 0 | 49.69  | 302.1882 | 24 | 0 |
| 0 | 29.46  | 282.162  | 23 | 0 |
| 0 | 100.13 | 436.1886 | 34 | 0 |
| 0 | 100.13 | 368.126  | 29 | 0 |
| 0 | 100.13 | 436.1886 | 34 | 0 |
| 0 | 47.56  | 221.1052 | 17 | 0 |
| 0 | 80.92  | 350.2457 | 25 | 0 |
| 0 | 20.23  | 150.1045 | 11 | 0 |
| 0 | 17.07  | 150.1045 | 11 | 0 |
| 0 | 105.45 | 686.4183 | 54 | 0 |
| 1 | 26.3   | 264.2089 | 21 | 0 |
| 0 | 20.23  | 242.261  | 16 | 0 |
| 0 | 38.69  | 310.1569 | 25 | 0 |
| 0 | 66.76  | 336.1128 | 24 | 0 |
| 0 | 100.13 | 300.0634 | 24 | 0 |
| 0 | 20.23  | 154.1358 | 12 | 0 |
| 0 | 0      | 204.1878 | 14 | 0 |

|   |        |          |    |   |
|---|--------|----------|----|---|
| 0 | 0      | 204.1878 | 15 | 0 |
| 0 | 0      | 136.1252 | 9  | 0 |
| 0 | 0      | 138.1409 | 11 | 0 |
| 0 | 26.3   | 198.162  | 13 | 0 |
| 0 | 26.3   | 184.1463 | 12 | 0 |
| 0 | 83.83  | 362.2093 | 27 | 0 |
| 0 | 80.67  | 360.1937 | 27 | 0 |
| 0 | 35.53  | 328.2038 | 26 | 0 |
| 0 | 29.46  | 326.2246 | 25 | 0 |
| 0 | 0      | 120.0939 | 9  | 0 |
| 0 | 17.07  | 148.0888 | 11 | 0 |
| 0 | 66.76  | 370.2144 | 28 | 0 |
| 0 | 66.76  | 302.1518 | 24 | 0 |
| 0 | 17.07  | 156.1514 | 10 | 0 |
| 0 | 29.46  | 296.1776 | 23 | 0 |
| 0 | 29.46  | 364.2402 | 28 | 0 |
| 0 | 33.37  | 308.1776 | 25 | 0 |
| 0 | 0      | 136.1252 | 11 | 0 |
| 0 | 29.46  | 286.1933 | 23 | 0 |
| 0 | 29.46  | 314.2246 | 25 | 0 |
| 0 | 29.46  | 314.2246 | 25 | 0 |
| 0 | 66.76  | 358.2144 | 28 | 0 |
| 0 | 29.46  | 286.1933 | 23 | 0 |
| 0 | 66.76  | 356.1988 | 28 | 0 |
| 0 | 29.46  | 312.2089 | 25 | 0 |
| 0 | 29.46  | 300.2089 | 24 | 0 |
| 0 | 29.46  | 258.162  | 21 | 0 |
| 0 | 66.76  | 358.2144 | 28 | 0 |
| 0 | 66.76  | 358.2144 | 28 | 0 |
| 0 | 66.76  | 344.1988 | 27 | 0 |
| 0 | 0      | 204.1878 | 16 | 0 |
| 0 | 77.76  | 326.1518 | 25 | 0 |
| 0 | 40.46  | 282.162  | 22 | 0 |
| 0 | 66.76  | 306.1831 | 22 | 0 |
| 0 | 96.22  | 436.1886 | 35 | 0 |
| 0 | 107.22 | 438.2042 | 34 | 0 |
| 0 | 96.22  | 436.1886 | 37 | 0 |
| 0 | 96.22  | 436.1886 | 36 | 0 |
| 0 | 37.3   | 116.0837 | 7  | 0 |
| 0 | 52.6   | 278.1518 | 20 | 0 |
| 0 | 52.6   | 222.0892 | 16 | 0 |



|   |        |          |    |   |
|---|--------|----------|----|---|
| 0 | 26.3   | 192.115  | 14 | 0 |
| 0 | 42.52  | 94.00885 | 4  | 0 |
| 0 | 25.3   | 62.01902 | 2  | 0 |
| 0 | 0      | 170.2035 | 11 | 0 |
| 1 | 39.52  | 311.1344 | 24 | 1 |
| 0 | 0      | 134.1096 | 10 | 0 |
| 0 | 29.54  | 289.2042 | 22 | 1 |
| 0 | 55.76  | 494.3396 | 40 | 0 |
| 0 | 9.23   | 148.0888 | 11 | 0 |
| 0 | 26.3   | 88.05243 | 5  | 0 |
| 0 | 52.04  | 60.06875 | 3  | 2 |
| 0 | 12.53  | 44.02621 | 3  | 0 |
| 0 | 21.94  | 43.0422  | 3  | 1 |
| 0 | 66.76  | 564.4179 | 43 | 0 |
| 0 | 29.46  | 164.0837 | 12 | 0 |
| 0 | 35.53  | 206.0943 | 15 | 0 |
| 0 | 17.07  | 152.1201 | 12 | 0 |
| 0 | 20.23  | 154.1358 | 12 | 0 |
| 0 | 69.92  | 358.2144 | 28 | 0 |
| 0 | 69.92  | 358.2144 | 28 | 0 |
| 0 | 60.69  | 342.2195 | 26 | 0 |
| 0 | 37.3   | 46.00548 | 2  | 0 |
| 0 | 30.21  | 96.02113 | 7  | 0 |
| 0 | 16.38  | 229.1467 | 18 | 1 |
| 0 | 0      | 204.1878 | 15 | 0 |
| 0 | 20.23  | 222.1984 | 17 | 0 |
| 1 | 0      | 204.1878 | 16 | 0 |
| 0 | 26.3   | 114.0681 | 8  | 0 |
| 0 | 0      | 204.1878 | 16 | 0 |
| 0 | 0      | 136.1252 | 10 | 0 |
| 0 | 60.69  | 298.1569 | 23 | 0 |
| 1 | 20.23  | 222.1984 | 18 | 0 |
| 0 | 146.58 | 624.2472 | 50 | 0 |
| 0 | 29.46  | 124.0524 | 9  | 0 |
| 0 | 40.46  | 350.2246 | 27 | 0 |
| 0 | 17.07  | 114.1045 | 7  | 0 |
| 0 | 0      | 226.2661 | 15 | 0 |
| 0 | 29.46  | 316.2402 | 25 | 0 |
| 0 | 17.07  | 100.0888 | 6  | 0 |
| 0 | 26.3   | 130.0994 | 8  | 0 |
| 0 | 26.3   | 158.1307 | 10 | 0 |

|   |        |          |    |   |
|---|--------|----------|----|---|
| 0 | 40.46  | 270.162  | 21 | 0 |
| 0 | 23.47  | 165.1154 | 12 | 1 |
| 0 | 60.69  | 366.2195 | 28 | 0 |
| 0 | 20.23  | 152.1201 | 10 | 0 |
| 0 | 20.23  | 88.08882 | 5  | 0 |
| 0 | 26.3   | 196.1463 | 15 | 0 |
| 0 | 75.39  | 253.1136 | 18 | 0 |
| 0 | 0      | 58.07825 | 3  | 0 |
| 0 | 17.07  | 72.05751 | 4  | 0 |
| 0 | 17.07  | 148.0888 | 11 | 0 |
| 0 | 69.92  | 360.2301 | 28 | 0 |
| 0 | 29.43  | 57.02146 | 3  | 0 |
| 0 | 0      | 134.1096 | 10 | 0 |
| 0 | 29.46  | 164.0837 | 12 | 0 |
| 0 | 0      | 136.1252 | 10 | 0 |
| 0 | 0      | 68.0626  | 4  | 0 |
| 0 | 12.89  | 129.0578 | 11 | 0 |
| 0 | 111.13 | 286.0477 | 23 | 0 |
| 0 | 25.06  | 168.115  | 14 | 0 |
| 0 | 0      | 136.1252 | 10 | 0 |
| 0 | 20.23  | 154.1358 | 10 | 0 |
| 0 | 26.3   | 196.1463 | 13 | 0 |
| 0 | 37.3   | 280.2402 | 19 | 0 |
| 1 | 0      | 204.1878 | 17 | 0 |
| 0 | 111.13 | 286.0477 | 23 | 0 |
| 0 | 40.46  | 348.2089 | 28 | 0 |
| 0 | 60.69  | 364.2038 | 29 | 0 |
| 0 | 53.6   | 362.1882 | 30 | 0 |
| 0 | 62.83  | 378.1831 | 32 | 0 |
| 0 | 0      | 134.1096 | 10 | 0 |
| 0 | 17.07  | 70.04186 | 4  | 0 |
| 0 | 43.37  | 154.063  | 10 | 0 |
| 0 | 26.3   | 74.03678 | 4  | 0 |
| 0 | 52.6   | 194.0579 | 14 | 0 |
| 0 | 52.32  | 151.0633 | 11 | 0 |
| 0 | 26.3   | 136.0524 | 10 | 0 |
| 0 | 52.32  | 75.03203 | 4  | 0 |
| 0 | 17.07  | 124.0888 | 8  | 0 |
| 0 | 26.3   | 144.115  | 9  | 0 |
| 0 | 38.05  | 46.0531  | 2  | 0 |
| 0 | 18.46  | 178.0994 | 13 | 0 |

|   |        |          |    |   |
|---|--------|----------|----|---|
| 0 | 46.53  | 152.0473 | 11 | 0 |
| 0 | 26.3   | 116.0837 | 7  | 0 |
| 0 | 0      | 83.95336 | 2  | 0 |
| 0 | 58.92  | 640.4492 | 52 | 0 |
| 0 | 17.07  | 126.1045 | 8  | 0 |
| 0 | 20.23  | 150.1045 | 11 | 0 |
| 0 | 0      | 136.1252 | 9  | 0 |
| 0 | 20.23  | 154.1358 | 10 | 0 |
| 0 | 20.23  | 222.1984 | 15 | 0 |
| 0 | 43.14  | 123.032  | 9  | 0 |
| 0 | 17.07  | 142.1358 | 9  | 0 |
| 0 | 0      | 128.1565 | 8  | 0 |
| 0 | 40.46  | 300.2089 | 23 | 0 |
| 0 | 29.46  | 296.1776 | 24 | 0 |
| 0 | 29.46  | 268.1463 | 22 | 0 |
| 0 | 69.56  | 283.1208 | 22 | 0 |
| 0 | 78.79  | 313.1314 | 24 | 0 |
| 0 | 17.07  | 128.1201 | 8  | 0 |
| 0 | 0      | 134.1096 | 10 | 0 |
| 0 | 18.46  | 138.0681 | 10 | 0 |
| 0 | 29.46  | 124.0524 | 9  | 0 |
| 0 | 37.3   | 282.2559 | 19 | 0 |
| 0 | 29.46  | 330.2559 | 24 | 0 |
| 0 | 17.07  | 134.0732 | 10 | 0 |
| 0 | 29.46  | 384.3028 | 29 | 0 |
| 0 | 18.46  | 396.3028 | 31 | 0 |
| 0 | 29.46  | 356.2715 | 27 | 0 |
| 0 | 18.46  | 368.2715 | 29 | 0 |
| 0 | 201.28 | 448.1006 | 35 | 0 |
| 0 | 0      | 106.0783 | 8  | 0 |
| 0 | 26.3   | 150.0681 | 11 | 0 |
| 0 | 26.02  | 107.0735 | 8  | 0 |
| 0 | 0      | 134.1096 | 10 | 0 |
| 0 | 0      | 212.2504 | 14 | 0 |
| 0 | 0      | 148.1252 | 11 | 0 |
| 0 | 17.07  | 86.07316 | 5  | 0 |
| 0 | 17.07  | 150.1045 | 11 | 0 |
| 0 | 29.46  | 348.2089 | 29 | 0 |
| 0 | 66.76  | 392.1988 | 32 | 0 |
| 0 | 0      | 120.0939 | 9  | 0 |
| 0 | 20.23  | 94.04186 | 7  | 0 |

|   |        |          |    |   |
|---|--------|----------|----|---|
| 0 | 20.23  | 122.0732 | 9  | 0 |
| 0 | 12.03  | 85.08915 | 6  | 1 |
| 0 | 35.53  | 150.0317 | 12 | 0 |
| 0 | 17.07  | 134.0732 | 10 | 0 |
| 0 | 17.07  | 58.04186 | 3  | 0 |
| 0 | 20.23  | 178.1358 | 13 | 0 |
| 0 | 43.37  | 130.063  | 8  | 0 |
| 0 | 26.02  | 59.0735  | 3  | 1 |
| 0 | 40.46  | 76.05243 | 4  | 0 |
| 0 | 20.23  | 150.1045 | 11 | 0 |
| 0 | 0      | 106.0783 | 8  | 0 |
| 0 | 131.36 | 302.0427 | 24 | 0 |
| 0 | 52.99  | 332.2351 | 25 | 0 |
| 0 | 90.29  | 376.225  | 28 | 0 |
| 1 | 29.46  | 280.1463 | 23 | 0 |
| 1 | 66.76  | 324.1362 | 26 | 0 |
| 0 | 29.46  | 280.1463 | 24 | 0 |
| 0 | 18.46  | 278.1307 | 24 | 0 |
| 0 | 66.76  | 308.1049 | 26 | 0 |
| 1 | 49.69  | 296.1412 | 24 | 0 |
| 0 | 66.76  | 370.2144 | 30 | 0 |
| 0 | 37.3   | 250.1933 | 17 | 0 |
| 0 | 0      | 136.1252 | 11 | 0 |
| 0 | 37.3   | 122.0368 | 9  | 0 |
| 1 | 0      | 204.1878 | 17 | 0 |
| 0 | 40.46  | 384.3028 | 28 | 0 |
| 0 | 37.3   | 276.2089 | 19 | 0 |
| 0 | 0      | 104.0626 | 8  | 0 |
| 0 | 20.23  | 74.07316 | 4  | 0 |
| 0 | 0      | 136.1252 | 10 | 0 |
| 0 | 0      | 134.1096 | 10 | 0 |
| 0 | 41.99  | 330.2195 | 27 | 0 |
| 0 | 24.39  | 200.1313 | 17 | 2 |
| 0 | 20.23  | 150.1045 | 11 | 0 |
| 0 | 0      | 92.0626  | 7  | 0 |
| 0 | 0      | 204.1878 | 14 | 0 |
| 0 | 80.92  | 312.1362 | 24 | 0 |
| 0 | 60.69  | 298.1569 | 23 | 0 |
| 0 | 0      | 204.1878 | 15 | 0 |
| 0 | 0      | 136.1252 | 9  | 0 |
| 0 | 0      | 184.2191 | 12 | 0 |

|         |                                                                                     |          |    |       |
|---------|-------------------------------------------------------------------------------------|----------|----|-------|
| 0       | 46.25                                                                               | 137.0841 | 10 | 1     |
| 0       | 0                                                                                   | 156.1878 | 10 | 0     |
| 0       | 0                                                                                   | 204.1878 | 16 | 0     |
| 0       | 17.07                                                                               | 150.1045 | 12 | 0     |
| 0       | 181.05                                                                              | 432.1056 | 34 | 0     |
| 0       | 89.79                                                                               | 299.1158 | 23 | 0     |
|         |                                                                                     |          |    |       |
|         | <b>Metabolites from Machine Learning Methods<br/>(330) (used for MDS using CDK)</b> |          |    |       |
| nRings7 | TopoPSA                                                                             | MW       | nB | nBase |
|         |                                                                                     |          |    |       |
| 0       | 0                                                                                   | 134.1096 | 10 | 0     |
| 0       | 0                                                                                   | 134.1096 | 10 | 0     |
| 0       | 0                                                                                   | 145.969  | 8  | 0     |
| 0       | 0                                                                                   | 134.1096 | 10 | 0     |
| 0       | 0                                                                                   | 128.1565 | 8  | 0     |
| 0       | 20.23                                                                               | 136.0888 | 10 | 0     |
| 0       | 20.23                                                                               | 206.1671 | 15 | 0     |
| 0       | 25.78                                                                               | 136.1    | 10 | 0     |
| 0       | 17.07                                                                               | 154.0185 | 10 | 0     |
| 0       | 0                                                                                   | 132.0939 | 10 | 0     |
| 0       | 0                                                                                   | 120.0939 | 9  | 0     |
| 0       | 46.53                                                                               | 354.2195 | 28 | 0     |
| 0       | 54.37                                                                               | 330.2195 | 24 | 0     |
| 0       | 37.3                                                                                | 136.0524 | 10 | 0     |
| 0       | 25.78                                                                               | 136.1    | 10 | 0     |
| 0       | 0                                                                                   | 142.0783 | 12 | 0     |
| 0       | 29.46                                                                               | 138.0681 | 10 | 0     |
| 0       | 38.33                                                                               | 193.1103 | 14 | 0     |
| 0       | 46.53                                                                               | 178.063  | 13 | 0     |
| 0       | 49.69                                                                               | 304.2038 | 24 | 0     |
| 0       | 20.23                                                                               | 136.0888 | 10 | 0     |
| 0       | 0                                                                                   | 126.1409 | 8  | 0     |
| 0       | 0                                                                                   | 120.0939 | 9  | 0     |
| 0       | 0                                                                                   | 134.1096 | 10 | 0     |
| 0       | 49.69                                                                               | 330.2195 | 25 | 0     |
| 0       | 17.07                                                                               | 148.0888 | 11 | 0     |
| 0       | 17.07                                                                               | 134.0732 | 10 | 0     |
| 0       | 0                                                                                   | 114.1409 | 7  | 0     |
| 0       | 38.33                                                                               | 207.1259 | 15 | 0     |
| 0       | 68.15                                                                               | 302.1154 | 24 | 0     |

|   |       |          |    |   |
|---|-------|----------|----|---|
| 0 | 79.15 | 286.0841 | 23 | 0 |
| 0 | 55.76 | 372.2301 | 28 | 0 |
| 0 | 66.76 | 374.2457 | 27 | 0 |
| 0 | 0     | 136.1252 | 11 | 0 |
| 0 | 35.53 | 180.0786 | 13 | 0 |
| 0 | 57.15 | 316.1311 | 25 | 0 |
| 0 | 39.44 | 176.0473 | 14 | 0 |
| 0 | 0     | 156.1878 | 10 | 0 |
| 0 | 29.46 | 138.0681 | 10 | 0 |
| 0 | 26.02 | 135.1048 | 10 | 1 |
| 0 | 55.76 | 494.3396 | 39 | 0 |
| 0 | 55.76 | 490.3083 | 39 | 0 |
| 0 | 60.44 | 372.2301 | 27 | 0 |
| 0 | 66.76 | 374.2457 | 27 | 0 |
| 0 | 12.89 | 119.0735 | 9  | 0 |
| 0 | 60.69 | 286.1569 | 22 | 0 |
| 0 | 0     | 132.0939 | 11 | 0 |
| 0 | 26.3  | 142.0994 | 10 | 0 |
| 0 | 83.83 | 360.1937 | 27 | 0 |
| 0 | 80.67 | 346.178  | 26 | 0 |
| 0 | 58.92 | 372.2301 | 29 | 0 |
| 0 | 29.46 | 312.2089 | 25 | 0 |
| 0 | 49.69 | 332.2351 | 25 | 0 |
| 0 | 49.69 | 326.1882 | 26 | 0 |
| 0 | 35.53 | 260.1412 | 21 | 0 |
| 0 | 76.74 | 372.1937 | 29 | 0 |
| 0 | 69.92 | 346.2144 | 27 | 0 |
| 0 | 49.69 | 326.1882 | 26 | 0 |
| 0 | 49.69 | 330.2195 | 26 | 0 |
| 0 | 46.53 | 328.2038 | 26 | 0 |
| 0 | 41.99 | 328.2038 | 27 | 0 |
| 0 | 71.06 | 330.1103 | 26 | 0 |
| 0 | 41.99 | 330.2195 | 27 | 0 |
| 0 | 49.69 | 330.2195 | 26 | 0 |
| 0 | 58.92 | 374.2457 | 29 | 0 |
| 0 | 49.69 | 330.2195 | 26 | 0 |
| 0 | 58.92 | 360.2301 | 28 | 0 |
| 0 | 46.53 | 328.2038 | 26 | 0 |
| 0 | 93.06 | 416.2199 | 32 | 0 |
| 0 | 93.06 | 416.2199 | 32 | 0 |
| 0 | 40.46 | 316.2402 | 23 | 0 |

|   |       |          |    |   |
|---|-------|----------|----|---|
| 0 | 66.76 | 374.2457 | 27 | 0 |
| 0 | 60.44 | 372.2301 | 27 | 0 |
| 0 | 17.07 | 120.0575 | 9  | 0 |
| 1 | 0     | 204.1878 | 17 | 0 |
| 0 | 20.23 | 222.1984 | 16 | 0 |
| 1 | 0     | 204.1878 | 16 | 0 |
| 0 | 0     | 204.1878 | 16 | 0 |
| 0 | 55.76 | 562.4022 | 45 | 0 |
| 0 | 49.69 | 248.1412 | 20 | 0 |
| 1 | 0     | 204.1878 | 17 | 0 |
| 0 | 0     | 204.1878 | 16 | 0 |
| 0 | 0     | 204.1878 | 17 | 0 |
| 0 | 0     | 204.1878 | 17 | 0 |
| 0 | 20.23 | 222.1984 | 17 | 0 |
| 1 | 0     | 204.1878 | 16 | 0 |
| 1 | 0     | 204.1878 | 17 | 0 |
| 0 | 0     | 204.1878 | 15 | 0 |
| 0 | 20.23 | 194.1671 | 14 | 0 |
| 0 | 37.3  | 278.2246 | 19 | 0 |
| 2 | 0     | 204.1878 | 17 | 0 |
| 0 | 17.07 | 146.0732 | 11 | 0 |
| 0 | 0     | 136.1252 | 10 | 0 |
| 0 | 0     | 136.1252 | 11 | 0 |
| 0 | 0     | 204.1878 | 16 | 0 |
| 0 | 55.76 | 494.3396 | 39 | 0 |
| 0 | 0     | 136.1252 | 10 | 0 |
| 0 | 20.23 | 154.1358 | 11 | 0 |
| 0 | 0     | 136.1252 | 11 | 0 |
| 0 | 0     | 204.1878 | 16 | 0 |
| 0 | 0     | 204.1878 | 17 | 0 |
| 0 | 66.76 | 408.2301 | 31 | 0 |
| 0 | 9.23  | 148.0888 | 11 | 0 |
| 0 | 46.53 | 328.2038 | 26 | 0 |
| 0 | 61.44 | 363.2886 | 27 | 2 |
| 0 | 60.69 | 296.1412 | 23 | 0 |
| 0 | 40.46 | 280.1463 | 22 | 0 |
| 0 | 80.92 | 314.1518 | 24 | 0 |
| 0 | 0     | 204.1878 | 17 | 0 |
| 1 | 0     | 204.1878 | 17 | 0 |
| 0 | 17.07 | 106.0419 | 8  | 0 |
| 0 | 23.79 | 103.0422 | 8  | 0 |

|   |        |          |    |   |
|---|--------|----------|----|---|
| 0 | 17.07  | 182.0732 | 15 | 0 |
| 0 | 3.24   | 239.1674 | 19 | 1 |
| 0 | 20.23  | 108.0575 | 8  | 0 |
| 0 | 26.3   | 136.0524 | 10 | 0 |
| 0 | 23.79  | 117.0578 | 9  | 0 |
| 0 | 49.69  | 248.1412 | 20 | 0 |
| 0 | 12.53  | 220.1827 | 18 | 0 |
| 0 | 0      | 204.1878 | 16 | 0 |
| 1 | 0      | 204.1878 | 17 | 0 |
| 0 | 0      | 204.1878 | 15 | 0 |
| 0 | 20.23  | 222.1984 | 17 | 0 |
| 0 | 55.76  | 480.324  | 39 | 0 |
| 0 | 17.07  | 206.1671 | 15 | 0 |
| 0 | 0      | 136.1252 | 10 | 0 |
| 0 | 0      | 136.1252 | 11 | 0 |
| 0 | 0      | 204.1878 | 16 | 0 |
| 0 | 63.6   | 316.1675 | 24 | 0 |
| 0 | 49.69  | 302.1882 | 24 | 0 |
| 0 | 69.92  | 332.1988 | 26 | 0 |
| 0 | 55.76  | 562.4022 | 45 | 0 |
| 0 | 0      | 204.1878 | 17 | 0 |
| 0 | 0      | 136.1252 | 11 | 0 |
| 0 | 63.6   | 332.1988 | 25 | 0 |
| 0 | 35.53  | 328.2038 | 26 | 0 |
| 0 | 29.46  | 314.2246 | 24 | 0 |
| 0 | 66.76  | 358.2144 | 27 | 0 |
| 0 | 29.46  | 286.1933 | 22 | 0 |
| 0 | 66.76  | 330.1831 | 25 | 0 |
| 0 | 18.46  | 314.2246 | 26 | 0 |
| 0 | 39.44  | 328.2038 | 26 | 0 |
| 0 | 29.46  | 314.2246 | 26 | 0 |
| 0 | 66.76  | 358.2144 | 29 | 0 |
| 0 | 29.46  | 286.1933 | 24 | 0 |
| 0 | 40.46  | 314.2246 | 24 | 0 |
| 0 | 29.46  | 328.2402 | 25 | 0 |
| 0 | 40.46  | 258.162  | 20 | 0 |
| 0 | 40.46  | 286.1933 | 22 | 0 |
| 0 | 86.99  | 374.2093 | 29 | 0 |
| 0 | 49.69  | 330.2195 | 26 | 0 |
| 0 | 100.13 | 368.126  | 29 | 0 |
| 0 | 33.37  | 310.1933 | 25 | 0 |



|   |        |          |    |   |
|---|--------|----------|----|---|
| 0 | 40.46  | 316.2402 | 23 | 0 |
| 0 | 29.46  | 330.2559 | 24 | 0 |
| 0 | 34.14  | 314.2246 | 23 | 0 |
| 0 | 40.46  | 288.2089 | 21 | 0 |
| 0 | 49.69  | 304.2038 | 24 | 0 |
| 0 | 77.76  | 332.1988 | 25 | 0 |
| 0 | 40.46  | 316.2402 | 23 | 0 |
| 0 | 40.46  | 310.1933 | 24 | 0 |
| 0 | 40.46  | 282.162  | 22 | 0 |
| 0 | 18.46  | 324.2089 | 26 | 0 |
| 0 | 29.46  | 310.1933 | 25 | 0 |
| 0 | 29.46  | 268.1463 | 22 | 0 |
| 0 | 29.46  | 296.1776 | 24 | 0 |
| 0 | 29.46  | 254.1307 | 21 | 0 |
| 0 | 29.46  | 258.162  | 20 | 0 |
| 0 | 18.46  | 258.162  | 22 | 0 |
| 0 | 29.46  | 258.162  | 22 | 0 |
| 0 | 66.76  | 302.1518 | 25 | 0 |
| 1 | 22.37  | 306.162  | 26 | 0 |
| 0 | 69.92  | 348.2301 | 27 | 0 |
| 0 | 46.53  | 246.1256 | 20 | 0 |
| 0 | 69.92  | 346.2144 | 27 | 0 |
| 0 | 49.69  | 302.1882 | 24 | 0 |
| 0 | 29.46  | 282.162  | 23 | 0 |
| 0 | 100.13 | 436.1886 | 34 | 0 |
| 0 | 100.13 | 368.126  | 29 | 0 |
| 0 | 100.13 | 436.1886 | 34 | 0 |
| 0 | 47.56  | 221.1052 | 17 | 0 |
| 0 | 80.92  | 350.2457 | 25 | 0 |
| 0 | 20.23  | 150.1045 | 11 | 0 |
| 0 | 17.07  | 150.1045 | 11 | 0 |
| 1 | 26.3   | 264.2089 | 21 | 0 |
| 0 | 38.69  | 310.1569 | 25 | 0 |
| 0 | 20.23  | 154.1358 | 12 | 0 |
| 0 | 0      | 204.1878 | 14 | 0 |
| 0 | 0      | 204.1878 | 15 | 0 |
| 0 | 0      | 136.1252 | 9  | 0 |
| 0 | 0      | 138.1409 | 11 | 0 |
| 0 | 26.3   | 198.162  | 13 | 0 |
| 0 | 26.3   | 184.1463 | 12 | 0 |
| 0 | 83.83  | 362.2093 | 27 | 0 |

|   |        |          |    |   |
|---|--------|----------|----|---|
| 0 | 80.67  | 360.1937 | 27 | 0 |
| 0 | 35.53  | 328.2038 | 26 | 0 |
| 0 | 29.46  | 326.2246 | 25 | 0 |
| 0 | 0      | 120.0939 | 9  | 0 |
| 0 | 17.07  | 148.0888 | 11 | 0 |
| 0 | 66.76  | 302.1518 | 24 | 0 |
| 0 | 17.07  | 156.1514 | 10 | 0 |
| 0 | 29.46  | 296.1776 | 23 | 0 |
| 0 | 29.46  | 364.2402 | 28 | 0 |
| 0 | 33.37  | 308.1776 | 25 | 0 |
| 0 | 0      | 136.1252 | 11 | 0 |
| 0 | 29.46  | 286.1933 | 23 | 0 |
| 0 | 29.46  | 314.2246 | 25 | 0 |
| 0 | 29.46  | 314.2246 | 25 | 0 |
| 0 | 66.76  | 358.2144 | 28 | 0 |
| 0 | 29.46  | 286.1933 | 23 | 0 |
| 0 | 66.76  | 356.1988 | 28 | 0 |
| 0 | 29.46  | 312.2089 | 25 | 0 |
| 0 | 29.46  | 300.2089 | 24 | 0 |
| 0 | 29.46  | 258.162  | 21 | 0 |
| 0 | 66.76  | 358.2144 | 28 | 0 |
| 0 | 66.76  | 358.2144 | 28 | 0 |
| 0 | 66.76  | 344.1988 | 27 | 0 |
| 0 | 0      | 204.1878 | 16 | 0 |
| 0 | 40.46  | 282.162  | 22 | 0 |
| 0 | 107.22 | 438.2042 | 34 | 0 |
| 0 | 96.22  | 436.1886 | 37 | 0 |
| 0 | 96.22  | 436.1886 | 36 | 0 |
| 0 | 52.6   | 278.1518 | 20 | 0 |
| 0 | 52.6   | 222.0892 | 16 | 0 |
| 0 | 26.3   | 192.115  | 14 | 0 |
| 1 | 39.52  | 311.1344 | 24 | 1 |
| 0 | 0      | 134.1096 | 10 | 0 |
| 0 | 29.54  | 289.2042 | 22 | 1 |
| 0 | 55.76  | 494.3396 | 40 | 0 |
| 0 | 9.23   | 148.0888 | 11 | 0 |
| 0 | 66.76  | 564.4179 | 43 | 0 |
| 0 | 29.46  | 164.0837 | 12 | 0 |
| 0 | 35.53  | 206.0943 | 15 | 0 |
| 0 | 17.07  | 152.1201 | 12 | 0 |
| 0 | 69.92  | 358.2144 | 28 | 0 |

|   |       |          |    |   |
|---|-------|----------|----|---|
| 0 | 69.92 | 358.2144 | 28 | 0 |
| 0 | 60.69 | 342.2195 | 26 | 0 |
| 0 | 16.38 | 229.1467 | 18 | 1 |
| 0 | 0     | 204.1878 | 15 | 0 |
| 0 | 20.23 | 222.1984 | 17 | 0 |
| 1 | 0     | 204.1878 | 16 | 0 |
| 0 | 0     | 204.1878 | 16 | 0 |
| 0 | 0     | 136.1252 | 10 | 0 |
| 0 | 60.69 | 298.1569 | 23 | 0 |
| 1 | 20.23 | 222.1984 | 18 | 0 |
| 0 | 29.46 | 124.0524 | 9  | 0 |
| 0 | 40.46 | 350.2246 | 27 | 0 |
| 0 | 17.07 | 114.1045 | 7  | 0 |
| 0 | 29.46 | 316.2402 | 25 | 0 |
| 0 | 26.3  | 158.1307 | 10 | 0 |
| 0 | 23.47 | 165.1154 | 12 | 1 |
| 0 | 60.69 | 366.2195 | 28 | 0 |
| 0 | 17.07 | 148.0888 | 11 | 0 |
| 0 | 69.92 | 360.2301 | 28 | 0 |
| 0 | 0     | 134.1096 | 10 | 0 |
| 0 | 29.46 | 164.0837 | 12 | 0 |
| 0 | 0     | 136.1252 | 10 | 0 |
| 0 | 12.89 | 129.0578 | 11 | 0 |
| 0 | 25.06 | 168.115  | 14 | 0 |
| 0 | 0     | 136.1252 | 10 | 0 |
| 0 | 26.3  | 196.1463 | 13 | 0 |
| 0 | 37.3  | 280.2402 | 19 | 0 |
| 1 | 0     | 204.1878 | 17 | 0 |
| 0 | 40.46 | 348.2089 | 28 | 0 |
| 0 | 60.69 | 364.2038 | 29 | 0 |
| 0 | 53.6  | 362.1882 | 30 | 0 |
| 0 | 62.83 | 378.1831 | 32 | 0 |
| 0 | 0     | 134.1096 | 10 | 0 |
| 0 | 52.6  | 194.0579 | 14 | 0 |
| 0 | 18.46 | 178.0994 | 13 | 0 |
| 0 | 58.92 | 640.4492 | 52 | 0 |
| 0 | 20.23 | 150.1045 | 11 | 0 |
| 0 | 20.23 | 222.1984 | 15 | 0 |
| 0 | 17.07 | 142.1358 | 9  | 0 |
| 0 | 0     | 128.1565 | 8  | 0 |
| 0 | 40.46 | 300.2089 | 23 | 0 |

|   |       |          |    |   |
|---|-------|----------|----|---|
| 0 | 29.46 | 296.1776 | 24 | 0 |
| 0 | 29.46 | 268.1463 | 22 | 0 |
| 0 | 69.56 | 283.1208 | 22 | 0 |
| 0 | 78.79 | 313.1314 | 24 | 0 |
| 0 | 17.07 | 128.1201 | 8  | 0 |
| 0 | 0     | 134.1096 | 10 | 0 |
| 0 | 18.46 | 138.0681 | 10 | 0 |
| 0 | 29.46 | 124.0524 | 9  | 0 |
| 0 | 37.3  | 282.2559 | 19 | 0 |
| 0 | 29.46 | 330.2559 | 24 | 0 |
| 0 | 17.07 | 134.0732 | 10 | 0 |
| 0 | 29.46 | 384.3028 | 29 | 0 |
| 0 | 18.46 | 396.3028 | 31 | 0 |
| 0 | 29.46 | 356.2715 | 27 | 0 |
| 0 | 18.46 | 368.2715 | 29 | 0 |
| 0 | 0     | 106.0783 | 8  | 0 |
| 0 | 26.3  | 150.0681 | 11 | 0 |
| 0 | 26.02 | 107.0735 | 8  | 0 |
| 0 | 0     | 134.1096 | 10 | 0 |
| 0 | 0     | 148.1252 | 11 | 0 |
| 0 | 17.07 | 150.1045 | 11 | 0 |
| 0 | 29.46 | 348.2089 | 29 | 0 |
| 0 | 66.76 | 392.1988 | 32 | 0 |
| 0 | 0     | 120.0939 | 9  | 0 |
| 0 | 20.23 | 122.0732 | 9  | 0 |
| 0 | 35.53 | 150.0317 | 12 | 0 |
| 0 | 17.07 | 134.0732 | 10 | 0 |
| 0 | 20.23 | 178.1358 | 13 | 0 |
| 0 | 52.99 | 332.2351 | 25 | 0 |
| 0 | 90.29 | 376.225  | 28 | 0 |
| 1 | 29.46 | 280.1463 | 23 | 0 |
| 1 | 66.76 | 324.1362 | 26 | 0 |
| 0 | 29.46 | 280.1463 | 24 | 0 |
| 0 | 18.46 | 278.1307 | 24 | 0 |
| 0 | 66.76 | 308.1049 | 26 | 0 |
| 1 | 49.69 | 296.1412 | 24 | 0 |
| 0 | 37.3  | 250.1933 | 17 | 0 |
| 0 | 0     | 136.1252 | 11 | 0 |
| 1 | 0     | 204.1878 | 17 | 0 |
| 0 | 40.46 | 384.3028 | 28 | 0 |
| 0 | 37.3  | 276.2089 | 19 | 0 |

|         |                                                                                     |          |    |       |
|---------|-------------------------------------------------------------------------------------|----------|----|-------|
| 0       | 0                                                                                   | 104.0626 | 8  | 0     |
| 0       | 0                                                                                   | 136.1252 | 10 | 0     |
| 0       | 0                                                                                   | 134.1096 | 10 | 0     |
| 0       | 41.99                                                                               | 330.2195 | 27 | 0     |
| 0       | 24.39                                                                               | 200.1313 | 17 | 2     |
| 0       | 20.23                                                                               | 150.1045 | 11 | 0     |
| 0       | 0                                                                                   | 92.0626  | 7  | 0     |
| 0       | 0                                                                                   | 204.1878 | 14 | 0     |
| 0       | 80.92                                                                               | 312.1362 | 24 | 0     |
| 0       | 60.69                                                                               | 298.1569 | 23 | 0     |
| 0       | 0                                                                                   | 204.1878 | 15 | 0     |
| 0       | 0                                                                                   | 136.1252 | 9  | 0     |
| 0       | 0                                                                                   | 204.1878 | 16 | 0     |
| 0       | 17.07                                                                               | 150.1045 | 12 | 0     |
|         |                                                                                     |          |    |       |
|         | <b>Metabolites after MDS using ADMET (112) (used for HCA and Scaffold analysis)</b> |          |    |       |
| nRings7 | TopoPSA                                                                             | MW       | nB | nBase |
|         |                                                                                     |          |    |       |
| 0       | 17.07                                                                               | 154.0185 | 10 | 0     |
| 0       | 46.53                                                                               | 354.2195 | 28 | 0     |
| 0       | 49.69                                                                               | 304.2038 | 24 | 0     |
| 0       | 49.69                                                                               | 330.2195 | 25 | 0     |
| 0       | 17.07                                                                               | 134.0732 | 10 | 0     |
| 0       | 68.15                                                                               | 302.1154 | 24 | 0     |
| 0       | 55.76                                                                               | 372.2301 | 28 | 0     |
| 0       | 66.76                                                                               | 374.2457 | 27 | 0     |
| 0       | 57.15                                                                               | 316.1311 | 25 | 0     |
| 0       | 60.44                                                                               | 372.2301 | 27 | 0     |
| 0       | 83.83                                                                               | 360.1937 | 27 | 0     |
| 0       | 58.92                                                                               | 372.2301 | 29 | 0     |
| 0       | 29.46                                                                               | 312.2089 | 25 | 0     |
| 0       | 49.69                                                                               | 332.2351 | 25 | 0     |
| 0       | 49.69                                                                               | 326.1882 | 26 | 0     |
| 0       | 35.53                                                                               | 260.1412 | 21 | 0     |
| 0       | 76.74                                                                               | 372.1937 | 29 | 0     |
| 0       | 49.69                                                                               | 330.2195 | 26 | 0     |
| 0       | 46.53                                                                               | 328.2038 | 26 | 0     |
| 0       | 41.99                                                                               | 328.2038 | 27 | 0     |
| 0       | 41.99                                                                               | 330.2195 | 27 | 0     |
| 0       | 49.69                                                                               | 330.2195 | 26 | 0     |

|   |       |          |    |   |
|---|-------|----------|----|---|
| 0 | 58.92 | 374.2457 | 29 | 0 |
| 0 | 49.69 | 330.2195 | 26 | 0 |
| 0 | 58.92 | 360.2301 | 28 | 0 |
| 0 | 46.53 | 328.2038 | 26 | 0 |
| 0 | 66.76 | 374.2457 | 27 | 0 |
| 0 | 49.69 | 248.1412 | 20 | 0 |
| 0 | 66.76 | 408.2301 | 31 | 0 |
| 0 | 46.53 | 328.2038 | 26 | 0 |
| 0 | 49.69 | 248.1412 | 20 | 0 |
| 0 | 63.6  | 316.1675 | 24 | 0 |
| 0 | 49.69 | 302.1882 | 24 | 0 |
| 0 | 69.92 | 332.1988 | 26 | 0 |
| 0 | 63.6  | 332.1988 | 25 | 0 |
| 0 | 35.53 | 328.2038 | 26 | 0 |
| 0 | 66.76 | 358.2144 | 27 | 0 |
| 0 | 66.76 | 330.1831 | 25 | 0 |
| 0 | 39.44 | 328.2038 | 26 | 0 |
| 0 | 66.76 | 358.2144 | 29 | 0 |
| 0 | 29.46 | 286.1933 | 24 | 0 |
| 0 | 40.46 | 314.2246 | 24 | 0 |
| 0 | 29.46 | 328.2402 | 25 | 0 |
| 0 | 40.46 | 258.162  | 20 | 0 |
| 0 | 40.46 | 286.1933 | 22 | 0 |
| 0 | 86.99 | 374.2093 | 29 | 0 |
| 0 | 49.69 | 330.2195 | 26 | 0 |
| 0 | 33.37 | 310.1933 | 25 | 0 |
| 0 | 49.69 | 304.2038 | 24 | 0 |
| 0 | 40.46 | 310.1933 | 24 | 0 |
| 0 | 40.46 | 282.162  | 22 | 0 |
| 0 | 18.46 | 324.2089 | 26 | 0 |
| 0 | 29.46 | 310.1933 | 25 | 0 |
| 0 | 29.46 | 268.1463 | 22 | 0 |
| 0 | 29.46 | 296.1776 | 24 | 0 |
| 0 | 29.46 | 254.1307 | 21 | 0 |
| 0 | 29.46 | 258.162  | 20 | 0 |
| 0 | 29.46 | 258.162  | 22 | 0 |
| 0 | 66.76 | 302.1518 | 25 | 0 |
| 1 | 22.37 | 306.162  | 26 | 0 |
| 0 | 46.53 | 246.1256 | 20 | 0 |
| 0 | 49.69 | 302.1882 | 24 | 0 |
| 0 | 29.46 | 282.162  | 23 | 0 |

|   |       |          |    |   |
|---|-------|----------|----|---|
| 0 | 47.56 | 221.1052 | 17 | 0 |
| 0 | 83.83 | 362.2093 | 27 | 0 |
| 0 | 80.67 | 360.1937 | 27 | 0 |
| 0 | 35.53 | 328.2038 | 26 | 0 |
| 0 | 29.46 | 326.2246 | 25 | 0 |
| 0 | 17.07 | 148.0888 | 11 | 0 |
| 0 | 66.76 | 302.1518 | 24 | 0 |
| 0 | 29.46 | 364.2402 | 28 | 0 |
| 0 | 33.37 | 308.1776 | 25 | 0 |
| 0 | 29.46 | 286.1933 | 23 | 0 |
| 0 | 29.46 | 314.2246 | 25 | 0 |
| 0 | 29.46 | 314.2246 | 25 | 0 |
| 0 | 66.76 | 358.2144 | 28 | 0 |
| 0 | 29.46 | 286.1933 | 23 | 0 |
| 0 | 66.76 | 356.1988 | 28 | 0 |
| 0 | 29.46 | 312.2089 | 25 | 0 |
| 0 | 29.46 | 300.2089 | 24 | 0 |
| 0 | 29.46 | 258.162  | 21 | 0 |
| 0 | 66.76 | 358.2144 | 28 | 0 |
| 0 | 66.76 | 358.2144 | 28 | 0 |
| 0 | 66.76 | 344.1988 | 27 | 0 |
| 0 | 69.92 | 358.2144 | 28 | 0 |
| 0 | 69.92 | 358.2144 | 28 | 0 |
| 0 | 60.69 | 342.2195 | 26 | 0 |
| 0 | 40.46 | 350.2246 | 27 | 0 |
| 0 | 29.46 | 316.2402 | 25 | 0 |
| 0 | 60.69 | 366.2195 | 28 | 0 |
| 0 | 69.92 | 360.2301 | 28 | 0 |
| 0 | 40.46 | 348.2089 | 28 | 0 |
| 0 | 60.69 | 364.2038 | 29 | 0 |
| 0 | 53.6  | 362.1882 | 30 | 0 |
| 0 | 62.83 | 378.1831 | 32 | 0 |
| 0 | 40.46 | 300.2089 | 23 | 0 |
| 0 | 29.46 | 296.1776 | 24 | 0 |
| 0 | 29.46 | 268.1463 | 22 | 0 |
| 0 | 29.46 | 384.3028 | 29 | 0 |
| 0 | 29.46 | 356.2715 | 27 | 0 |
| 0 | 29.46 | 348.2089 | 29 | 0 |
| 0 | 66.76 | 392.1988 | 32 | 0 |
| 0 | 20.23 | 178.1358 | 13 | 0 |
| 0 | 90.29 | 376.225  | 28 | 0 |

|   |       |          |    |   |
|---|-------|----------|----|---|
| 1 | 29.46 | 280.1463 | 23 | 0 |
| 1 | 66.76 | 324.1362 | 26 | 0 |
| 0 | 29.46 | 280.1463 | 24 | 0 |
| 0 | 66.76 | 308.1049 | 26 | 0 |
| 1 | 49.69 | 296.1412 | 24 | 0 |
| 0 | 41.99 | 330.2195 | 27 | 0 |
| 0 | 24.39 | 200.1313 | 17 | 2 |
| 0 | 20.23 | 150.1045 | 11 | 0 |
|   |       |          |    |   |
