# Supplementary material
Source: PubMed Central journal article supplement (PMC6964292)
Supplement: ao9b02663_si_003.pdf [file ao9b02663_si_003.pdf]

# Supplementary Information for

Identification of psychoactive metabolites from *Cannabis sativa*,  
its smoke and other phytocannabinoids using machine learning  
and multivariate methods

*Ramesh Jagannathan\**

International Medical Cannabis Association, Toronto, Ontario, M1S 5E8, CANADA

|    | Metabolite Name               | Metabolite Structure                                                                |
|----|-------------------------------|-------------------------------------------------------------------------------------|
| C1 | 1,1-Dimethylhydrazine         | 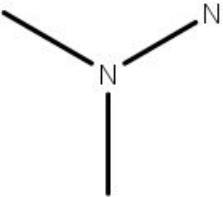   |
| C2 | 1,2,3,4-Tetramethylbenzene    |    |
| C3 | 1,2-Diethylbenzene            |   |
| C4 | 1,3,5-Triazine-2,4,6-triamine |  |
| C5 | 1,3-Dichlorobenzene           |  |

|     |                        |                                                                                      |
|-----|------------------------|--------------------------------------------------------------------------------------|
| C6  | 1,4-Diethylbenzene     |     |
| C7  | 1-Butanol              |     |
| C8  | 1-Butoxy-2-Propanol    |    |
| C9  | Hexan-1-ol             |   |
| C10 | Undecan-1-ol           |  |
| C11 | 2,2,5-Trimethylhexane  |   |
| C12 | 2,3,4-Trimethylpentane |   |

|     |                        |                                                                                      |
|-----|------------------------|--------------------------------------------------------------------------------------|
| C13 | 2,4,6-Trimethylphenol  | 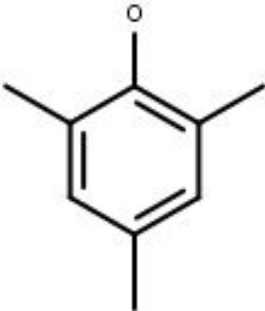    |
| C14 | 2,4-Ditert-butylphenol |     |
| C15 | 2,6-Diethylpyrazine    |   |
| C16 | 2,5-Dimethylpyrazine   |  |
| C17 | Butan-2-one            |   |
| C18 | 2-Butoxyethanol        |  |

|     |                              |                                                                                      |
|-----|------------------------------|--------------------------------------------------------------------------------------|
| C19 | 1-(2-Chlorophenyl)Ethenone   | 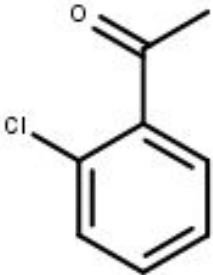    |
| C20 | 1,3-Dimethyl-2-Vinyl Benzene |     |
| C21 | 2-Ethoxyethanol              |     |
| C22 | 2-Ethyl-1-hexanol            |  |
| C23 | 2-Ethyl Toluene              |   |

|     |                                                   |                                                                                                                                                                                                                                                                                                                                                                                                                                                                                                             |
|-----|---------------------------------------------------|-------------------------------------------------------------------------------------------------------------------------------------------------------------------------------------------------------------------------------------------------------------------------------------------------------------------------------------------------------------------------------------------------------------------------------------------------------------------------------------------------------------|
| C24 | 2-Formyl-Delta-9-Tetrahydrocannabinol             | 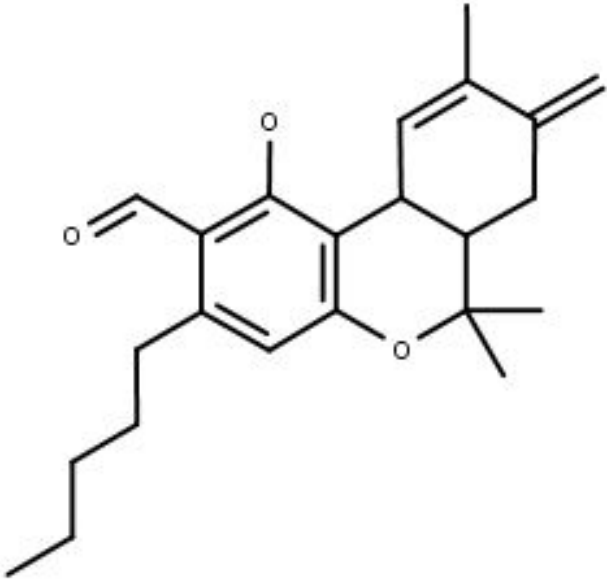 <p>The structure shows a central benzene ring with a formyl group (-CHO) at the 2-position, a pentyl chain at the 3-position, a hydroxyl group (-OH) at the 4-position, and a delta-9-tetrahydrocannabinol (THC) side chain at the 1-position. The THC side chain consists of a six-membered ring with a methyl group, a double bond, and a methylidene group, connected to the benzene ring via a methylene bridge.</p> |
| C25 | 2-Geranyl-5-Hydroxy-3-n-Pentanyl-1,4-Benzoquinone |  <p>The structure shows a 1,4-benzoquinone core with a hydroxyl group (-OH) at the 5-position, a geranyl chain at the 2-position, and an n-pentyl chain at the 3-position. The geranyl chain is a branched hydrocarbon chain with two double bonds.</p>                                                                                                                                                                  |
| C26 | 2-Heptanone                                       |  <p>The structure shows a seven-carbon chain with a ketone group (=O) at the second carbon position.</p>                                                                                                                                                                                                                                                                                                                |
| C27 | 2-Hydroxy-Acetophenone                            |  <p>The structure shows a benzene ring with a hydroxyl group (-OH) at the 2-position and an acetyl group (-COCH<sub>3</sub>) at the 1-position.</p>                                                                                                                                                                                                                                                                      |

|     |                              |                                                                                     |
|-----|------------------------------|-------------------------------------------------------------------------------------|
| C28 | 2-Isopropyl-3-methylpyrazine | 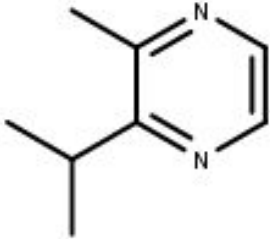   |
| C29 | 2-Methylaziridine            |    |
| C30 | 2-Methylnaphthalene          |    |
| C31 | 2-Methyl-1H-imidazole        |   |
| C32 | 2-Methyl-Propanamine         |  |
| C33 | 2-Methylpentane              |  |
| C34 | 2-Nitropropane               |  |

|     |                                                     |                                                                                     |
|-----|-----------------------------------------------------|-------------------------------------------------------------------------------------|
| C35 | 2-Phenoxy Ethanol                                   | 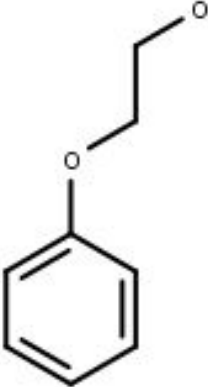   |
| C36 | 3-(1-Methyl Ethyl)-Phenol Carbamate                 |   |
| C37 | 3-(3-Hydroxy Phenyl)-2-Propenoic acid, methyl ester |  |



|     |                                                                                                |                                                                                     |
|-----|------------------------------------------------------------------------------------------------|-------------------------------------------------------------------------------------|
| C38 | 3,4,5,6-Tetrahydro-7-hydroxy-a,a-2-trimethyl-9-n-propyl-2,6-methano-2H-1-Benzoxocin-5-methanol | 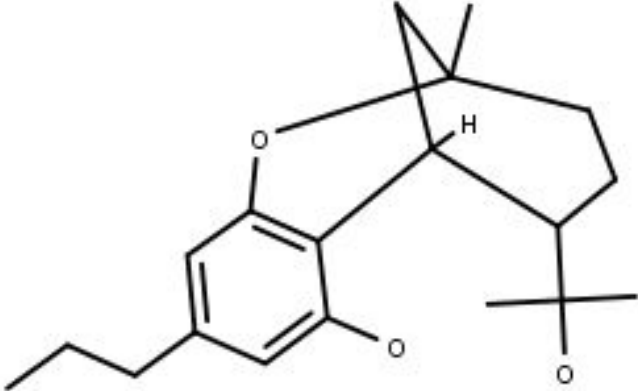  |
| C39 | 3,4,5-Trimethylphenol                                                                          |    |
| C40 | 3,4,5-Trimethylhex-1-ene                                                                       |  |
| C41 | 3-Ethyl Toulene                                                                                |  |
| C42 | 3-Ethyl-O-xylene                                                                               |  |

|     |                                     |                                                                                                                                                                                                                                                                                                                                                                                                       |
|-----|-------------------------------------|-------------------------------------------------------------------------------------------------------------------------------------------------------------------------------------------------------------------------------------------------------------------------------------------------------------------------------------------------------------------------------------------------------|
| C43 | 3-Hydroxy-Delta-4,5-Cannabichromene | 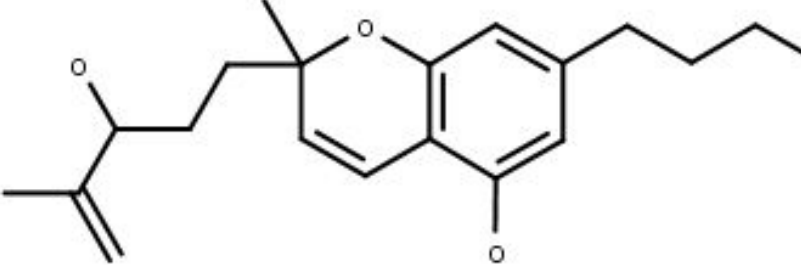 <p>The structure shows a benzopyran core. The benzene ring has a hydroxyl group at the 3-position and a pentyl chain at the 1-position. The pyran ring has a methyl group at the 4-position and a propyl chain at the 5-position. The propyl chain is substituted with an isopropenyl group at the 3-position.</p> |
| C44 | 3-Isopropyl Benzaldehyde            |  <p>The structure shows a benzene ring with an aldehyde group (-CHO) at the 1-position and an isopropyl group at the 3-position.</p>                                                                                                                                                                                 |
| C45 | 3-Methyl Acetophenone               |  <p>The structure shows a benzene ring with an acetyl group (-COCH<sub>3</sub>) at the 1-position and a methyl group at the 3-position.</p>                                                                                                                                                                         |
| C46 | 3-Methyl Heptane                    |  <p>The structure shows a seven-carbon alkane chain with a methyl group attached to the third carbon.</p>                                                                                                                                                                                                         |
| C47 | 3-methylcyclopent-2-en-1-one        |  <p>The structure shows a five-membered ring with a ketone group (=O) at the 1-position, a double bond between carbons 2 and 3, and a methyl group at the 3-position.</p>                                                                                                                                          |
| C48 | 3-Methyl Pentane                    |  <p>The structure shows a five-carbon alkane chain with a methyl group attached to the third carbon.</p>                                                                                                                                                                                                           |

|     |                                                         |                                                                                                                                                                                                                                                                                                      |
|-----|---------------------------------------------------------|------------------------------------------------------------------------------------------------------------------------------------------------------------------------------------------------------------------------------------------------------------------------------------------------------|
| C49 | 3-Methyl-5-(1-Methyl Ethyl)-Phenol Methyl Carbamate     | 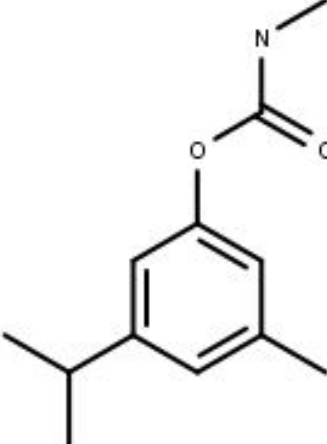 <p>The structure shows a benzene ring with a methyl group at the 3-position and a 1-methyl ethyl group at the 5-position. A methyl carbamate group (-O-C(=O)-N-CH3) is attached to the 1-position of the ring.</p> |
| C50 | 3-Pentanol                                              |  <p>The structure shows a five-carbon chain with a hydroxyl group (-OH) attached to the third carbon atom.</p>                                                                                                      |
| C51 | 4,5-Dihydroxy-2,3,6-Trimethoxy-9,10-Dihydrophenanthrene |  <p>The structure shows a phenanthrene skeleton with a saturated 9,10-position. It features hydroxyl groups (-OH) at positions 4 and 5, and methoxy groups (-O-CH3) at positions 2, 3, and 6.</p>                 |
| C52 | 4,7-Dimethoxyphenanthrene-1,2,5-triol                   |  <p>The structure shows a phenanthrene skeleton with a saturated 9,10-position. It features hydroxyl groups (-OH) at positions 1, 2, and 5, and methoxy groups (-O-CH3) at positions 4 and 7.</p>                |

|     |                                                |                                                                                                                                                                                                                                                                                                                                                                                     |
|-----|------------------------------------------------|-------------------------------------------------------------------------------------------------------------------------------------------------------------------------------------------------------------------------------------------------------------------------------------------------------------------------------------------------------------------------------------|
| C53 | 4-Acetoxy Cannabichromene                      | 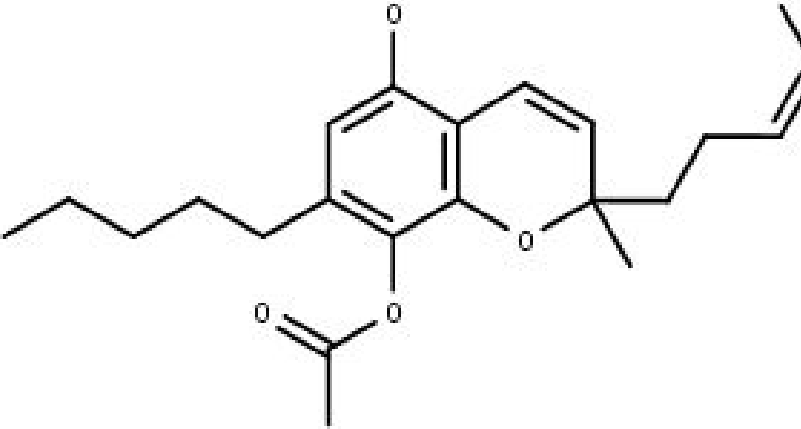 <p>The structure shows a chromene ring system. The benzene ring is substituted with a pentyl group at the 4-position, an acetoxy group at the 3-position, and a hydroxyl group at the 1-position. The pyran ring has a methyl group at the 2-position and a geranyl group at the 6-position.</p> |
| C54 | 4-Acetoxy-2-geranyl-5-hydroxy-3-n-pentylphenol |  <p>The structure shows a benzene ring with a hydroxyl group at the 1-position, an acetoxy group at the 4-position, a pentyl group at the 3-position, and a geranyl group at the 2-position.</p>                                                                                                 |
| C55 | 4-Carene                                       |  <p>The structure shows a bicyclic system consisting of a cyclohexene ring fused to a cyclopropane ring. There is a methyl group on the cyclohexene ring and a gem-dimethyl group on the cyclopropane ring.</p>                                                                                  |
| C56 | 4-Ethoxy-3-anisaldehyde                        |  <p>The structure shows a benzene ring with an aldehyde group at the 1-position, an ethoxy group at the 4-position, and a methoxy group at the 3-position.</p>                                                                                                                                  |

|     |                                                        |                                                                                                                                                                                                                                                                                                                               |
|-----|--------------------------------------------------------|-------------------------------------------------------------------------------------------------------------------------------------------------------------------------------------------------------------------------------------------------------------------------------------------------------------------------------|
| C57 | 4-Hydroxy-2,3,6,7-tetramethoxy-9,10dihydrophenanthrene | 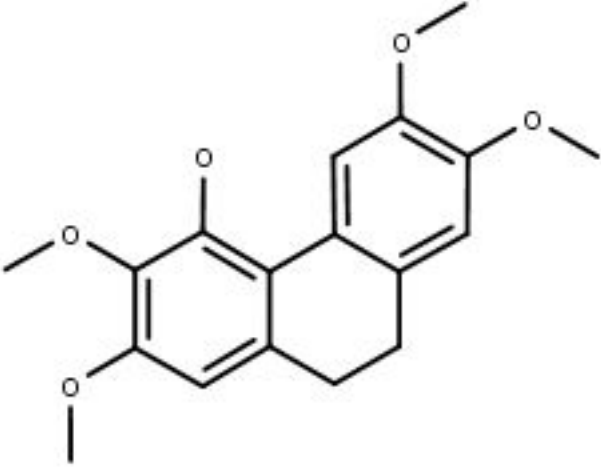 <p>The structure shows a phenanthrene core with a saturated 9,10-dihydro bridge. The left ring has a hydroxyl group at position 4 and methoxy groups at positions 2, 3, and 7. The right ring has methoxy groups at positions 6 and 8.</p> |
| C58 | 4-Methoxy-Couramin                                     |  <p>The structure shows a coumarin core with a methoxy group at position 4 and a carbonyl group at position 2.</p>                                                                                                                          |
| C59 | 4-Methyl Decane                                        |  <p>The structure shows a decane chain with a methyl group attached to the fourth carbon atom.</p>                                                                                                                                         |
| C60 | 4-Methylpyrimidine                                     |  <p>The structure shows a pyrimidine ring with a methyl group attached to the fourth carbon atom.</p>                                                                                                                                      |
| C61 | 4-Methyl Guaiacol                                      |  <p>The structure shows a benzene ring with a hydroxyl group at position 1, a methoxy group at position 3, and a methyl group at position 4.</p>                                                                                           |

|     |                                             |                                                                                         |
|-----|---------------------------------------------|-----------------------------------------------------------------------------------------|
| C62 | 4-Methyl Phenyl ethyl amine                 | 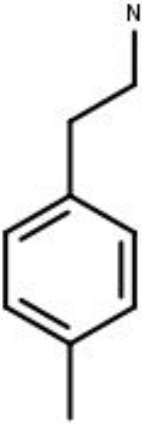       |
| C63 | 4-Pyridinamine                              | <br>Cl |
| C64 | 4-Terpinyyl Delta-9-tetrahydrocannabinolate |     |

|     |                                                     |                                                                                                                                                                                                                                                                                                                                                                                                                                                                                                                |
|-----|-----------------------------------------------------|----------------------------------------------------------------------------------------------------------------------------------------------------------------------------------------------------------------------------------------------------------------------------------------------------------------------------------------------------------------------------------------------------------------------------------------------------------------------------------------------------------------|
| C65 | 4-Terpenyl Cannabinolate                            | 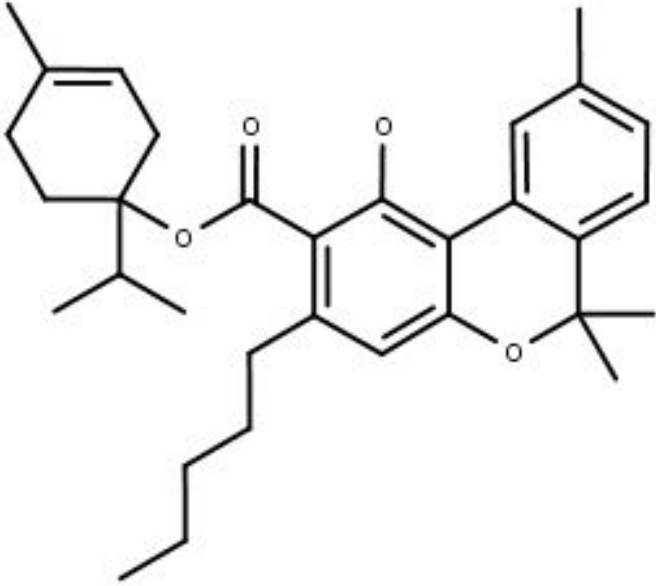 <p>The structure shows a central benzene ring with a carbonyl group at the top position. To the left, an ester linkage connects to a terpenyl group consisting of a cyclohexene ring with a methyl group and an isopropyl group. To the right, another ester linkage connects to a 3,5-dimethylphenyl ring with an isopropyl group. A pentyl chain is attached to the bottom-left position of the central benzene ring.</p> |
| C66 | 5-Acetoxy-6-Geranyl-3n -<br>Pentyl-1,4-Benzoquinone |  <p>The structure shows a 1,4-benzoquinone core with two carbonyl groups at the 1 and 4 positions. At the 5-position, there is an acetoxy group. At the 6-position, there is a geranyl chain (a branched 10-carbon chain with two double bonds). At the 3-position, there is a pentyl chain.</p>                                                                                                                            |

|     |                                |                                                                                                                                                                                                                                                                                                                                                                                                                                                                                                                  |
|-----|--------------------------------|------------------------------------------------------------------------------------------------------------------------------------------------------------------------------------------------------------------------------------------------------------------------------------------------------------------------------------------------------------------------------------------------------------------------------------------------------------------------------------------------------------------|
| C67 | 5-Acetyl-4-Hydroxycannabigerol | 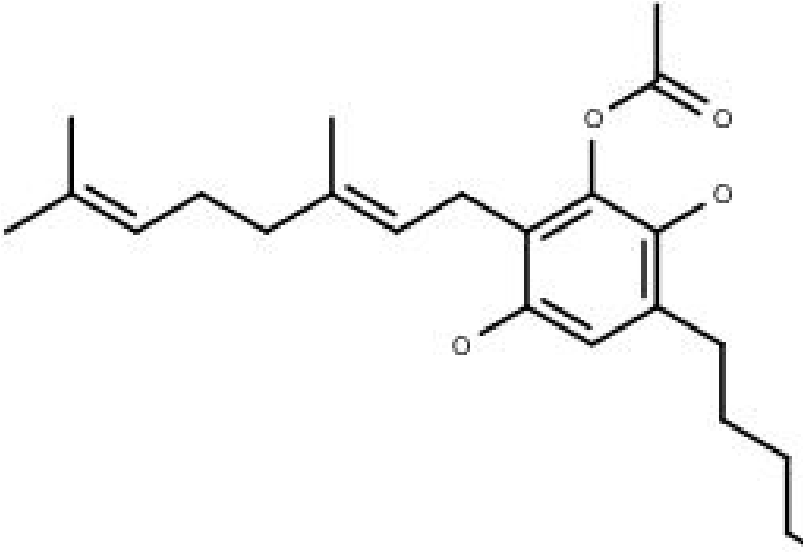 <p>The structure shows a central benzene ring with a hydroxyl group (-OH) at the 1-position, an acetyl group (-COCH<sub>3</sub>) at the 2-position, and a propyl chain at the 3-position. The propyl chain is attached to a double bond of a side chain that also has a methyl group. This side chain is further extended by another propyl chain, which is also attached to a double bond with a methyl group.</p>           |
| C68 | 5-Ethenyl-2-Methylpyridine     |  <p>The structure shows a pyridine ring with a methyl group at the 2-position and a vinyl group (-CH=CH<sub>2</sub>) at the 5-position.</p>                                                                                                                                                                                                                                                                                    |
| C69 | 5-Methoxy Cannabigerolic acid  |  <p>The structure shows a central benzene ring with a carboxylic acid group (-COOH) at the 1-position, a methoxy group (-OCH<sub>3</sub>) at the 2-position, and a propyl chain at the 3-position. The propyl chain is attached to a double bond of a side chain that also has a methyl group. This side chain is further extended by another propyl chain, which is also attached to a double bond with a methyl group.</p> |



|     |                                        |                                                                                                                                                                                                                                                                                                                                                             |
|-----|----------------------------------------|-------------------------------------------------------------------------------------------------------------------------------------------------------------------------------------------------------------------------------------------------------------------------------------------------------------------------------------------------------------|
| C70 | 5-Methyl-4-Pentyl-Biphenyl-2,2,6-Triol | 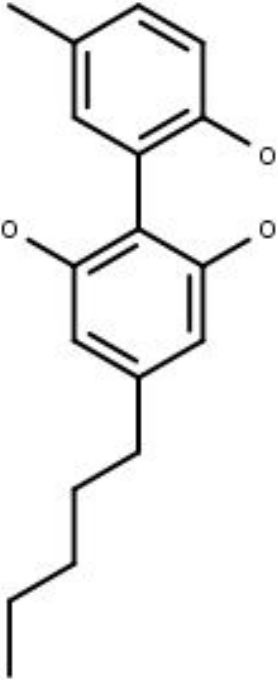 <p>The structure shows two benzene rings connected at their 1-positions. The top ring has a methyl group at the 5-position and a hydroxyl group at the 2-position. The bottom ring has hydroxyl groups at the 2 and 6 positions and a pentyl chain at the 4-position.</p> |
| C71 | 5-Methylindane                         |  <p>The structure consists of a benzene ring fused to a five-membered ring. A methyl group is attached to the 5-position of the benzene ring.</p>                                                                                                                         |
| C72 | 5-Octanolide                           |  <p>The structure is a six-membered lactone ring (a ring with one oxygen atom and one carbonyl group). An octyl chain is attached to the carbon atom adjacent to the oxygen atom in the ring.</p>                                                                       |

|     |                                   |                                                                                                                                                                                                                                                                                                                                                                                                                                                                                                                                      |
|-----|-----------------------------------|--------------------------------------------------------------------------------------------------------------------------------------------------------------------------------------------------------------------------------------------------------------------------------------------------------------------------------------------------------------------------------------------------------------------------------------------------------------------------------------------------------------------------------------|
| C73 | 6,7-cis -Epoxy-cannabigerol       | 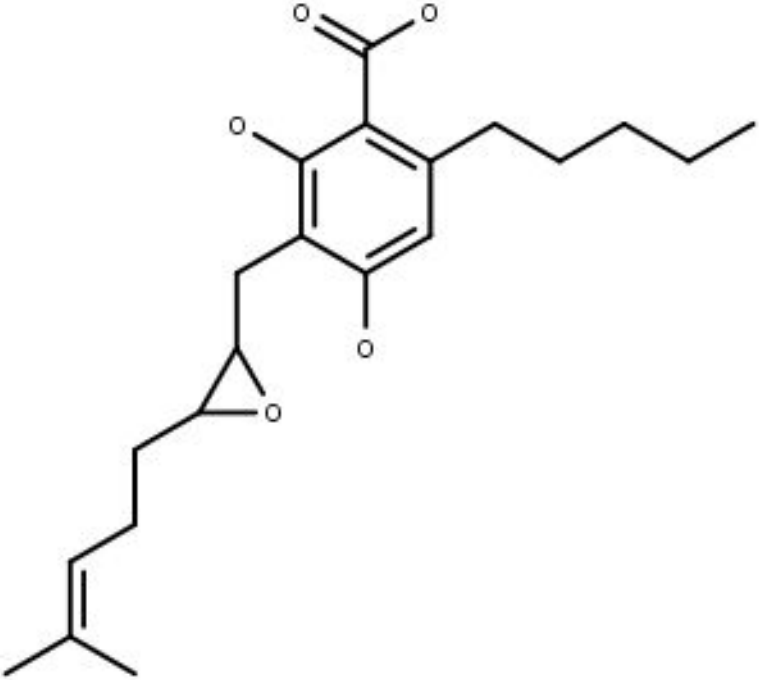 <p>The structure shows a central benzene ring with a carboxylate group (-COO-) at the top position. Moving clockwise from the carboxylate group, there is a pentyl chain, a chlorine atom at the 3-position, and a chlorine atom at the 4-position. At the 5-position, there is a propyl chain that is part of a larger side chain containing a cis-epoxy ring and a terminal isopropenyl group.</p>                                              |
| C74 | 6,7-cis-Epoxy-cannabigerolic acid |  <p>The structure is identical to the one in the first row, showing a central benzene ring with a carboxylate group (-COO-) at the top position. Moving clockwise from the carboxylate group, there is a pentyl chain, a chlorine atom at the 3-position, and a chlorine atom at the 4-position. At the 5-position, there is a propyl chain that is part of a larger side chain containing a cis-epoxy ring and a terminal isopropenyl group.</p> |

|     |                          |                                                                                                                                                                                                                                                                                                                                                                                                                                                                                                                                                                                                                                                                                     |
|-----|--------------------------|-------------------------------------------------------------------------------------------------------------------------------------------------------------------------------------------------------------------------------------------------------------------------------------------------------------------------------------------------------------------------------------------------------------------------------------------------------------------------------------------------------------------------------------------------------------------------------------------------------------------------------------------------------------------------------------|
| C75 | 6a-R-Cannabichromanone B | 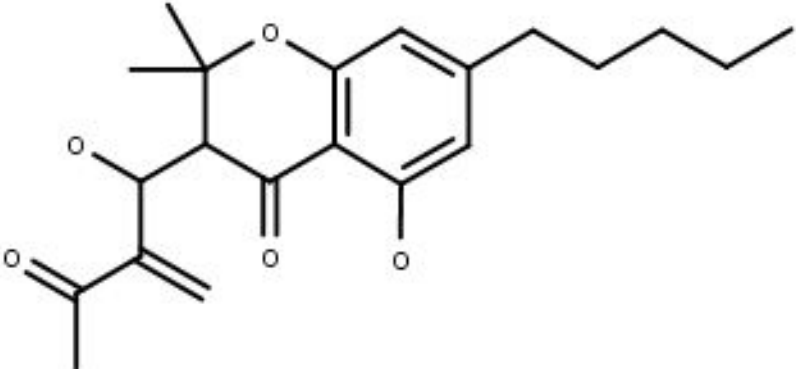 <p>The structure shows a central benzene ring with a chlorine atom at the 1-position and a chlorine atom at the 3-position. At the 4-position, there is a propyl chain. At the 5-position, there is a side chain consisting of a carbonyl group, a carbon atom bonded to a methyl group and a methoxy group, and another carbon atom bonded to a methyl group and a methoxy group.</p>                                                                                                                                                                                                           |
| C76 | 6a-R-Cannabichromanone C |  <p>The structure is similar to 6a-R-Cannabichromanone B, but the side chain at the 5-position is different. It consists of a carbonyl group, a methylene group, and a carbon atom bonded to a methyl group and a methoxy group.</p>                                                                                                                                                                                                                                                                                                                                                             |
| C77 | 6-Metiltetrapterol A     |  <p>The structure shows a complex polycyclic system. It features a central benzene ring with a chlorine atom at the 1-position and a chlorine atom at the 3-position. At the 4-position, there is a side chain consisting of a carbonyl group, a carbon atom bonded to a methyl group and a methoxy group, and another carbon atom bonded to a methyl group and a methoxy group. At the 5-position, there is a side chain consisting of a carbonyl group, a carbon atom bonded to a methyl group and a methoxy group, and another carbon atom bonded to a methyl group and a methoxy group.</p> |

|     |                                    |                                                                                                                                                                                                                                                 |
|-----|------------------------------------|-------------------------------------------------------------------------------------------------------------------------------------------------------------------------------------------------------------------------------------------------|
| C78 | 6-Prenylapigenin                   | 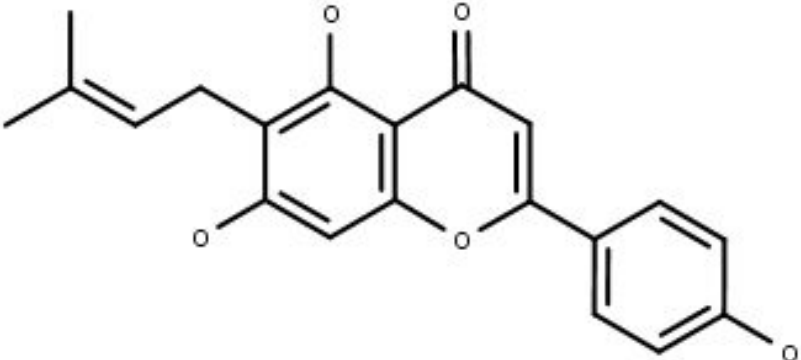 <p>The structure shows a flavone core with a prenyl group at C6, a methoxy group at C7, a carbonyl group at C4, and a 4-methoxyphenyl group at C3.</p>       |
| C79 | 7,8-Dehydro-10-O-ethylcannabitriol |  <p>The structure shows a complex polycyclic cannabinoid core with an ethyl ether group at C10, a propyl group at C1, and a trimethylgermyl group at C2.</p> |
| C80 | 7,8-Dihydrocannabinol              |  <p>The structure shows a cannabinoid core with a pentyl group at C5, a trimethylgermyl group at C2, and a 1-methyl-2-pyrone ring at C3.</p>                |

|     |                            |                                                                                                                                                                                                                                                                                                                                                                                                                                                                                                        |
|-----|----------------------------|--------------------------------------------------------------------------------------------------------------------------------------------------------------------------------------------------------------------------------------------------------------------------------------------------------------------------------------------------------------------------------------------------------------------------------------------------------------------------------------------------------|
| C81 | 7-Hydroxy Cannabichromane  | 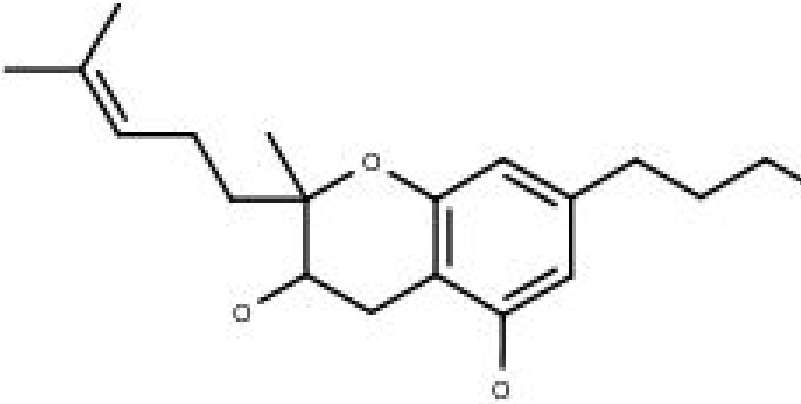 <p>The structure shows a chromane ring system. At the 1-position, there is a propyl chain attached to a terminal carbon of a 2-methyl-2-butene group. At the 2-position, there is a methyl group. At the 7-position, there is a hydroxyl group. At the 8-position, there is a pentyl chain. The benzene ring of the chromane system has a hydroxyl group at the 5-position.</p>                                     |
| C82 | 7-Hydroxy cannabinol       |  <p>The structure shows a chromane ring system. At the 1-position, there is a quaternary carbon atom bonded to two methyl groups and a propyl chain. At the 2-position, there is a methyl group. At the 7-position, there is a hydroxyl group. At the 8-position, there is a pentyl chain. The benzene ring of the chromane system has a methyl group at the 5-position and a hydroxyl group at the 6-position.</p> |
| C83 | 7-Methoxy Cannabispiranone |  <p>The structure shows a spirocyclic system consisting of a five-membered ring fused to a six-membered ring. The five-membered ring has a methoxy group at the 7-position. The six-membered ring has a carbonyl group at the 1-position.</p>                                                                                                                                                                       |

|     |                                             |                                                                                                                                                                                                                                                                                                                                                                                                                                                                                                |
|-----|---------------------------------------------|------------------------------------------------------------------------------------------------------------------------------------------------------------------------------------------------------------------------------------------------------------------------------------------------------------------------------------------------------------------------------------------------------------------------------------------------------------------------------------------------|
| C84 | 7-R-Cannabicumarononic acid                 | 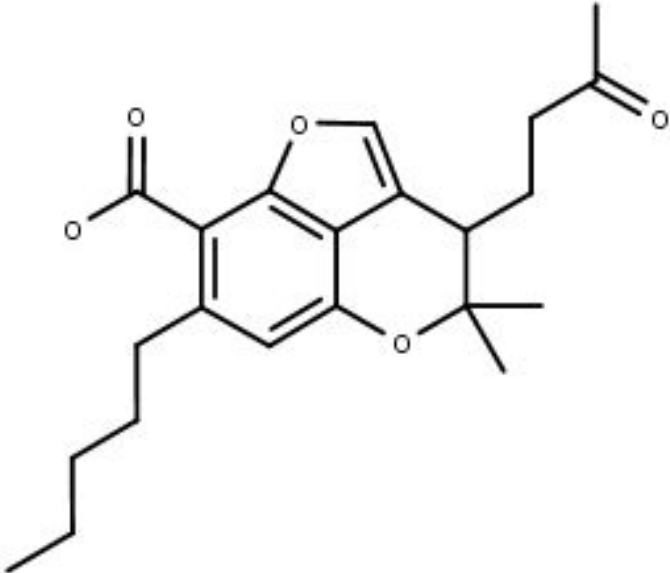 <p>The structure shows a central benzene ring with a pyran ring fused to it. The pyran ring has a methyl group at C2 and a methyl group at C6. The benzene ring has a propyl group at C1, a propyl group at C4, and a propyl group at C5. The pyran ring has a propyl group at C3 and a propyl group at C7. The propyl group at C7 is attached to a propyl chain that ends in a carboxylic acid group.</p>  |
| C85 | 8,9-Dihydroxy-delta-6a-tetrahydrocannabinol |  <p>The structure shows a central benzene ring with a pyran ring fused to it. The pyran ring has a methyl group at C2 and a methyl group at C6. The benzene ring has a propyl group at C1, a propyl group at C4, and a propyl group at C5. The pyran ring has a propyl group at C3 and a propyl group at C7. The propyl group at C7 is attached to a propyl chain that ends in a carboxylic acid group.</p> |

|     |                                         |                                                                                                                                                                                                                                                                                                                                                                                                                                                                                                                                                                 |
|-----|-----------------------------------------|-----------------------------------------------------------------------------------------------------------------------------------------------------------------------------------------------------------------------------------------------------------------------------------------------------------------------------------------------------------------------------------------------------------------------------------------------------------------------------------------------------------------------------------------------------------------|
| C86 | 8-Hydroxy cannabinolic acid             | 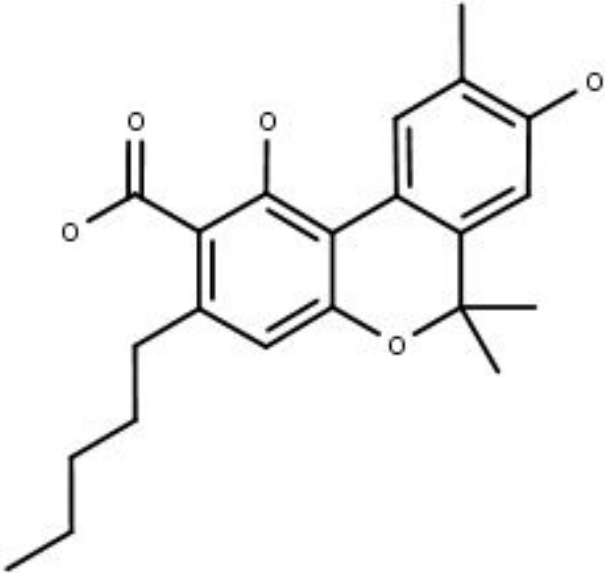 <p>The structure shows a central benzopyran core. The pyrene ring has a methyl group at C1, a hydroxyl group at C2, and a propyl group at C3. The pyrone ring has a methyl group at C4, a hydroxyl group at C5, and a propyl group at C6. A carboxylic acid group is attached to the C8 position of the pyrene ring.</p>                                                                                                                                                     |
| C87 | 8-Hydroxyl cannabinol                   |  <p>The structure shows a central benzopyran core. The pyrene ring has a methyl group at C1, a hydroxyl group at C2, and a propyl group at C3. The pyrone ring has a methyl group at C4, a hydroxyl group at C5, and a propyl group at C6. A hydroxyl group is attached to the C8 position of the pyrene ring.</p>                                                                                                                                                           |
| C88 | 8a-Hydroxy-Delta-9-tetrahydrocannabinol |  <p>The structure shows a central benzopyran core. The pyrene ring has a methyl group at C1, a hydroxyl group at C2, and a propyl group at C3. The pyrone ring has a methyl group at C4, a hydroxyl group at C5, and a propyl group at C6. A hydroxyl group is attached to the C8a position of the pyrene ring, shown with a dashed bond. A double bond is present between C9 and C10, with a methyl group at C9 and a hydroxyl group at C10, shown with a wedged bond.</p> |

|     |                                                         |                                                                                                                                                                                                                                                                                                                      |
|-----|---------------------------------------------------------|----------------------------------------------------------------------------------------------------------------------------------------------------------------------------------------------------------------------------------------------------------------------------------------------------------------------|
| C89 | 8-oxo-Delta-9-tetrahydrocannabinol                      | 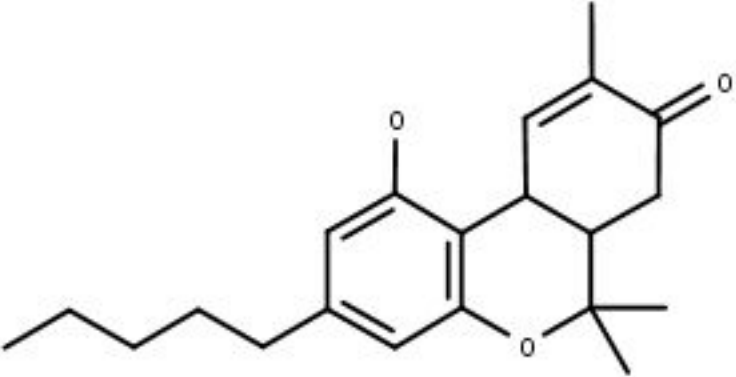 <p>The structure shows a central benzene ring with a propyl chain at the 5-position, a methoxy group at the 3-position, and a 6-methyl-8-oxo-2,3-dihydro-1,4-benzoxepin-5-yl group at the 1-position.</p>                         |
| C90 | 9,10-Anhydrocannabitol                                  |  <p>The structure features a central benzene ring with a propyl chain at the 5-position, a methoxy group at the 3-position, and a 6,7,8-trimethyl-9,10-anhydrocannabinol-5-yl group at the 1-position.</p>                         |
| C91 | 9,10-Dihydro-2,3,5,6-Tetramethoxyphenanthrene-1,4-dione |  <p>The structure consists of a phenanthrene core with a five-membered ring fused at the 1,4-positions containing two carbonyl groups. The 2,3,5,6-positions of the phenanthrene system are substituted with methoxy groups.</p> |



|     |                                                           |                                                                                                                                                                                                                                                                                                                                                                                                                                                                                                                                                                                                        |
|-----|-----------------------------------------------------------|--------------------------------------------------------------------------------------------------------------------------------------------------------------------------------------------------------------------------------------------------------------------------------------------------------------------------------------------------------------------------------------------------------------------------------------------------------------------------------------------------------------------------------------------------------------------------------------------------------|
| C92 | 9 $\beta$ , 10 $\beta$ -<br>Epoxyhexahydrocannabinol      | 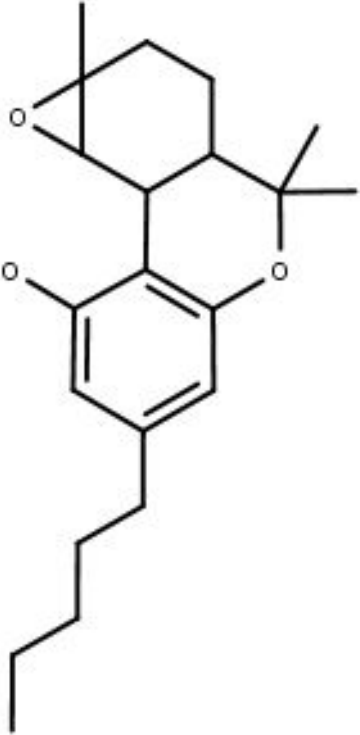 <p>The structure shows a bicyclic system consisting of a cyclohexane ring fused to a tetrahydropyran ring. An epoxide group is formed by the oxygen bridge between the two rings. A quaternary carbon atom is attached to the tetrahydropyran ring, bearing two methyl groups. A benzene ring is attached to the tetrahydropyran ring at the 9-position. This benzene ring has a hydroxyl group at the 10-position and a pentyl chain at the 11-position.</p>                                                        |
| C93 | 10 $\alpha$ -Hydroxy-Delta- 9,11 -<br>Hexahydrocannabinol |  <p>The structure shows a bicyclic system consisting of a cyclohexane ring fused to a tetrahydropyran ring. A double bond is present in the cyclohexane ring, and a methyl group is attached to the carbon adjacent to the double bond. A quaternary carbon atom is attached to the tetrahydropyran ring, bearing two methyl groups. A benzene ring is attached to the tetrahydropyran ring at the 9-position. This benzene ring has a hydroxyl group at the 10-position and a pentyl chain at the 11-position.</p> |

|     |                                                   |                                                                                                                                                                                                                                                                                                                                                                                                                                                                                         |
|-----|---------------------------------------------------|-----------------------------------------------------------------------------------------------------------------------------------------------------------------------------------------------------------------------------------------------------------------------------------------------------------------------------------------------------------------------------------------------------------------------------------------------------------------------------------------|
| C94 | 10-Ethoxy-9-hydroxy-delta-6a-Tetrahydrocannabinol | 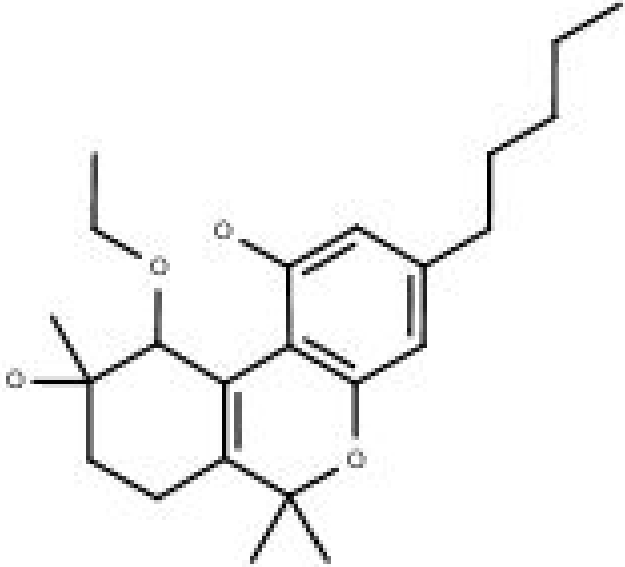 <p>The structure shows a tricyclic cannabinoid core. It features a methyl group at C1, a methyl group at C5, and a methyl group at C10. At C9, there is a hydroxyl group. At C10, there is an ethoxy group. At C6, there is a propyl group. The ring system includes a six-membered ring with a double bond between C4 and C5, and a seven-membered ring with a double bond between C2 and C3.</p>   |
| C95 | 10-Hydroxy-9-oxo-Delta-8-Tetrahydrocannabinol     |  <p>The structure shows a tricyclic cannabinoid core. It features a methyl group at C1, a methyl group at C5, and a methyl group at C10. At C9, there is a carbonyl group. At C10, there is a hydroxyl group. At C6, there is a propyl group. The ring system includes a six-membered ring with a double bond between C4 and C5, and a seven-membered ring with a double bond between C2 and C3.</p> |
| C96 | 10-O-Ethyl bis-nor Cannabitriol                   |  <p>The structure shows a tricyclic cannabinoid core. It features a methyl group at C1, a methyl group at C5, and a methyl group at C10. At C9, there is a hydroxyl group. At C10, there is an ethoxy group. At C6, there is a propyl group. The ring system includes a six-membered ring with a double bond between C4 and C5, and a seven-membered ring with a double bond between C2 and C3.</p> |

|     |                                                |                                                                                     |
|-----|------------------------------------------------|-------------------------------------------------------------------------------------|
| C97 | 10-Oxo-delta-6a-Tetrahydrocannabinol (OTHC)    | 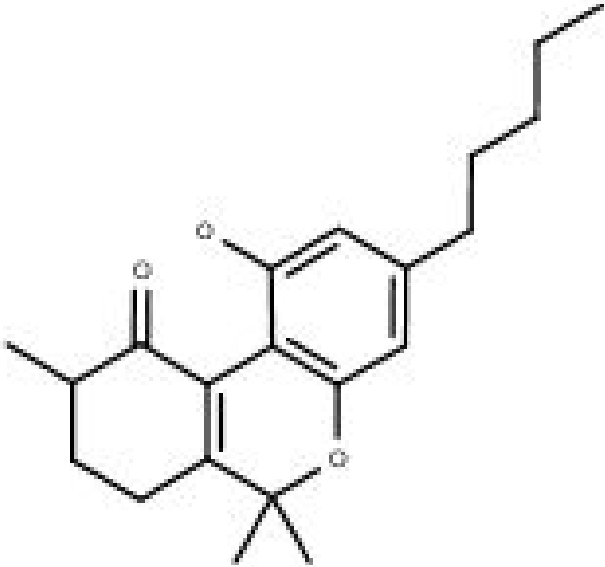  |
| C98 | 11-Acetoxy-Delta-8-Tetrahydrocannabinolic acid |  |

|      |                                                          |                                                                                                                                                                                                                                                                                                                                                                                                                                                                                                               |
|------|----------------------------------------------------------|---------------------------------------------------------------------------------------------------------------------------------------------------------------------------------------------------------------------------------------------------------------------------------------------------------------------------------------------------------------------------------------------------------------------------------------------------------------------------------------------------------------|
| C99  | 11-Acetoxy-Delta-9 -<br>Tetrahydrocannabinolic acid<br>A | 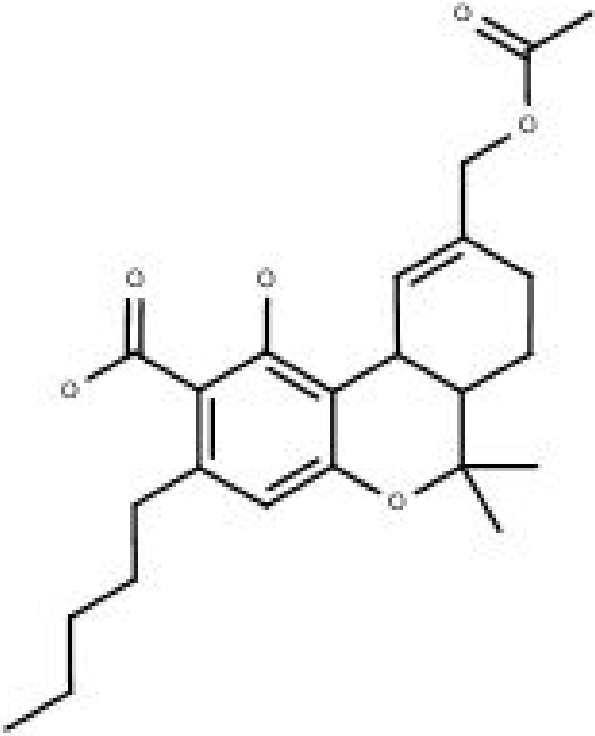 <p>The structure shows a central benzene ring with a methyl group at the 1-position, a pentyl group at the 3-position, and a propyl chain at the 4-position. The propyl chain is attached to a six-membered ring containing a double bond and an oxygen atom. This six-membered ring is further substituted with a methyl group and a side chain consisting of a methylene group, a double bond, and an acetoxy group.</p> |
| C100 | Abnormal Cannabigerol                                    |  <p>The structure features a central benzene ring with a methyl group at the 1-position, a propyl group at the 3-position, and a hydroxyl group at the 4-position. The propyl group is attached to a propyl chain, which is in turn attached to a double bond. This double bond is substituted with a methyl group and a side chain consisting of a methylene group, a double bond, and an isopropyl group.</p>            |
| C101 | Acetaldehyde                                             |  <p>The structure shows a two-carbon chain with a double bond to an oxygen atom at the end, representing the aldehyde group.</p>                                                                                                                                                                                                                                                                                           |

|      |                                     |                                                                                      |
|------|-------------------------------------|--------------------------------------------------------------------------------------|
| C102 | Acetamide                           | 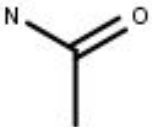    |
| C103 | Acetic acid                         |     |
| C104 | Acetone                             |     |
| C105 | Acetyl abnormal hydrocannabigeronol |   |
| C106 | Acetyl cannabigeronol               |  |

|      |                   |                                                                                     |
|------|-------------------|-------------------------------------------------------------------------------------|
| C107 | Acrolein          | 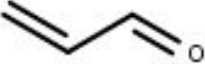   |
| C108 | Acetophenone      |    |
| C109 | Alloaromadendrene |   |
| C110 | Alpha-Bisabolol   |  |

|      |                                                   |                                                                                                                                                                                                                                                                                                                                                                                                                                                 |
|------|---------------------------------------------------|-------------------------------------------------------------------------------------------------------------------------------------------------------------------------------------------------------------------------------------------------------------------------------------------------------------------------------------------------------------------------------------------------------------------------------------------------|
| C111 | $\alpha$ -Bulnescene                              | 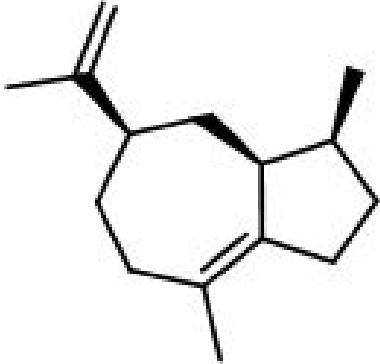 <p>The structure of <math>\alpha</math>-Bulnescene is a bicyclic sesquiterpene. It features a fused seven-membered and five-membered ring system. The seven-membered ring has a double bond and a methyl group. The five-membered ring has a methyl group and a vinyl group. There is also a methyl group on the seven-membered ring.</p>                     |
| C112 | $\alpha$ -Cadinene                                |  <p>The structure of <math>\alpha</math>-Cadinene is a bicyclic sesquiterpene. It consists of two fused six-membered rings. The left ring has a double bond and a methyl group. The right ring has a double bond, a methyl group, and a propyl group. There is also a methyl group on the left ring.</p>                                                      |
| C113 | $\alpha$ -Cadinyl Delta-9-tetrahydrocannabinolate |  <p>The structure of <math>\alpha</math>-Cadinyl Delta-9-tetrahydrocannabinolate is a complex molecule. It features a bicyclic sesquiterpene core (the <math>\alpha</math>-cadinyl part) linked via an ester bond to a tetrahydrocannabinol (THC) derivative. The THC part has a long alkyl chain and a methyl group. The entire molecule is a diester.</p> |

|      |                       |                                                                                                                                                                                                                                                                                                                                                                                                                                                                                                                  |
|------|-----------------------|------------------------------------------------------------------------------------------------------------------------------------------------------------------------------------------------------------------------------------------------------------------------------------------------------------------------------------------------------------------------------------------------------------------------------------------------------------------------------------------------------------------|
| C114 | Alpha-Cannabispiranol | 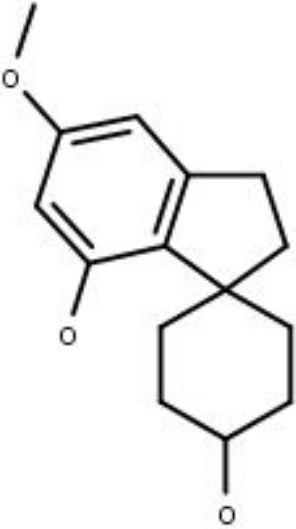 <p>The structure of Alpha-Cannabispiranol is a complex polycyclic molecule. It features a central bicyclic core consisting of a benzene ring fused to a five-membered ring. This core is further fused to a six-membered ring. The benzene ring has a methoxy group (-OCH<sub>3</sub>) at the 1-position and a hydroxyl group (-OH) at the 2-position. The six-membered ring has a hydroxyl group (-OH) at the 1-position.</p> |
| C115 | Alpha-Cedrene         |  <p>The structure of Alpha-Cedrene is a bicyclic sesquiterpene. It consists of a bicyclic core with a double bond in the six-membered ring. There are two methyl groups attached to the five-membered ring, one on a wedge and one on a dash. There is also a methyl group on the six-membered ring.</p>                                                                                                                       |
| C116 | Alpha-Cis-Bergamotene |  <p>The structure of Alpha-Cis-Bergamotene is a bicyclic sesquiterpene. It features a bicyclic core with a double bond in the six-membered ring. There is a methyl group on the five-membered ring. A side chain is attached to the six-membered ring, consisting of a double bond and a methyl group.</p>                                                                                                                   |



|      |                |                                                                                                                                                                                                                                                                                                                                                                                                                                                                                      |
|------|----------------|--------------------------------------------------------------------------------------------------------------------------------------------------------------------------------------------------------------------------------------------------------------------------------------------------------------------------------------------------------------------------------------------------------------------------------------------------------------------------------------|
| C117 | Alpha- Copaene | 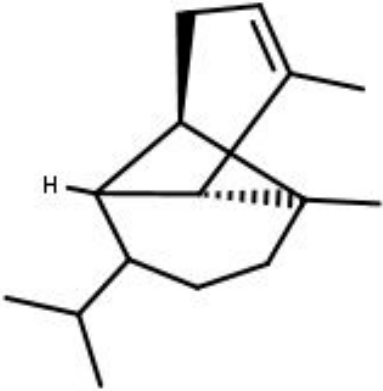 <p>The structure of Alpha-Copaene is a bicyclic sesquiterpene. It features a decalin core with a five-membered ring fused to the decalin system. This five-membered ring contains a double bond and a methyl group. The decalin system has a hydrogen atom explicitly labeled 'H' at one bridgehead position and a methyl group at the other. A propyl group is attached to the decalin ring.</p> |
| C118 | Alpha-Cubebene |  <p>The structure of Alpha-Cubebene is a bicyclic sesquiterpene. It consists of a decalin core with a five-membered ring fused to one of the decalin rings. This five-membered ring has a double bond and a methyl group. The decalin system has a methyl group at one bridgehead position and a propyl group at the other. A methyl group is also attached to the five-membered ring.</p>         |
| C119 | Alpha-Eudesmol |  <p>The structure of Alpha-Eudesmol is a bicyclic sesquiterpene. It features a decalin core with a six-membered ring fused to one of the decalin rings. This six-membered ring has a double bond and a methyl group. The decalin system has a methyl group at one bridgehead position and a propyl group at the other. A methyl group is also attached to the six-membered ring.</p>             |
| C120 | Alpha-Guaiene  |  <p>The structure of Alpha-Guaiene is a bicyclic sesquiterpene. It consists of a decalin core with a five-membered ring fused to one of the decalin rings. This five-membered ring has a double bond and a methyl group. The decalin system has a methyl group at one bridgehead position and a propyl group at the other. A methyl group is also attached to the five-membered ring.</p>         |

|      |                 |                                                                                                                                                                                                                                                                                                                                                                                                                                                                                                              |
|------|-----------------|--------------------------------------------------------------------------------------------------------------------------------------------------------------------------------------------------------------------------------------------------------------------------------------------------------------------------------------------------------------------------------------------------------------------------------------------------------------------------------------------------------------|
| C121 | Alpha-Gurjunene | 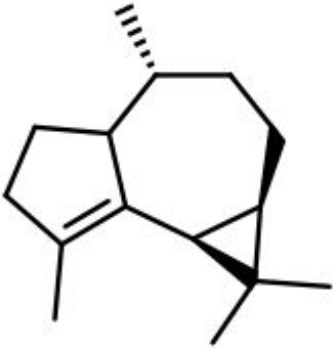 <p>The structure of Alpha-Gurjunene is a complex polycyclic sesquiterpene. It features a bicyclic core consisting of a seven-membered ring fused to a five-membered ring. A third ring is fused to the seven-membered ring, and a fourth ring is fused to the five-membered ring. The structure includes several methyl groups, a double bond in the five-membered ring, and a dashed bond indicating stereochemistry.</p> |
| C122 | Alpha-Humulene  |  <p>The structure of Alpha-Humulene is a bicyclic sesquiterpene. It consists of two fused six-membered rings. The structure is highly substituted with several methyl groups and contains three double bonds, one in each of the six-membered rings.</p>                                                                                                                                                                    |
| C123 | Alpha-Ionol     |  <p>The structure of Alpha-Ionol is a bicyclic sesquiterpene. It features a bicyclic core with a six-membered ring fused to a five-membered ring. The structure is substituted with several methyl groups and a double bond. A side chain is attached to the six-membered ring, containing a double bond and a terminal oxygen atom.</p>                                                                                  |

|      |                             |                                                                                     |
|------|-----------------------------|-------------------------------------------------------------------------------------|
| C124 | Alpha-Linolenic acid        | 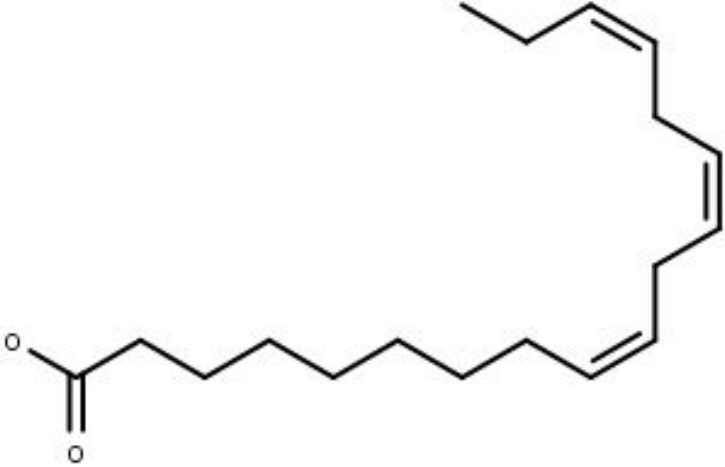  |
| C125 | Alpha-Longipinene           |   |
| C126 | Alpha-Methyl-Cinnamaldehyde |  |
| C127 | Alpha-Phellandrene          |  |

|      |                                                 |                                                                                                                                                                                                                                                                                                                                                                                                                                                                               |
|------|-------------------------------------------------|-------------------------------------------------------------------------------------------------------------------------------------------------------------------------------------------------------------------------------------------------------------------------------------------------------------------------------------------------------------------------------------------------------------------------------------------------------------------------------|
| C128 | Alpha-Pinene                                    | 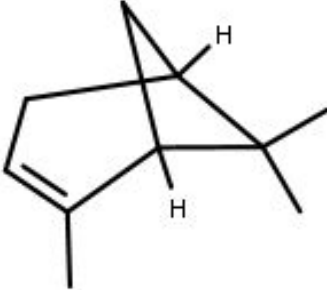 <p>The structure of Alpha-Pinene is a bicyclic monoterpene. It consists of a six-membered ring fused to a five-membered ring. The six-membered ring has a double bond and two methyl groups. The five-membered ring has two hydrogen atoms explicitly labeled 'H' at the bridgehead positions.</p>                                                                                          |
| C129 | Alpha-Selinene                                  |  <p>The structure of Alpha-Selinene is a bicyclic sesquiterpene. It features two fused six-membered rings. The left ring is saturated and has a methyl group and a vinyl group. The right ring is partially saturated and has a methyl group and a vinyl group. Stereochemistry is indicated with wedges and dashes.</p>                                                                    |
| C130 | Alpha-Terpinyyl Delta-9-tetrahydrocannabinolate |  <p>The structure of Alpha-Terpinyyl Delta-9-tetrahydrocannabinolate is a complex molecule. It features a central benzene ring with a carboxylate group (part of a larger ester linkage) and a long alkyl chain. The benzene ring is substituted with two terpenyl groups, each consisting of a six-membered ring with a double bond and a methyl group, and a quaternary carbon atom.</p> |
| C131 | Alpha-Terpinene                                 |  <p>The structure of Alpha-Terpinene is a monoterpene consisting of a six-membered ring with a double bond and two methyl groups in a 1,3-relationship.</p>                                                                                                                                                                                                                                |

|      |                         |                                                                                      |
|------|-------------------------|--------------------------------------------------------------------------------------|
| C132 | Alpha-Terpineol         | 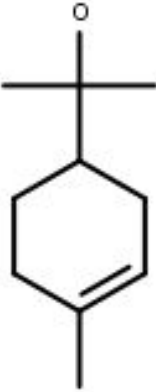    |
| C133 | Alpha-Thujene           |     |
| C134 | Alpha-Trans-Bergamotene |  |
| C135 | Alpha-Ylangene          |  |

|      |              |                                                                                                                                                                                                                                                                                                                                                                                                                                                                                                                                                                                                                                                    |
|------|--------------|----------------------------------------------------------------------------------------------------------------------------------------------------------------------------------------------------------------------------------------------------------------------------------------------------------------------------------------------------------------------------------------------------------------------------------------------------------------------------------------------------------------------------------------------------------------------------------------------------------------------------------------------------|
| C136 | Amorfrutin-3 | 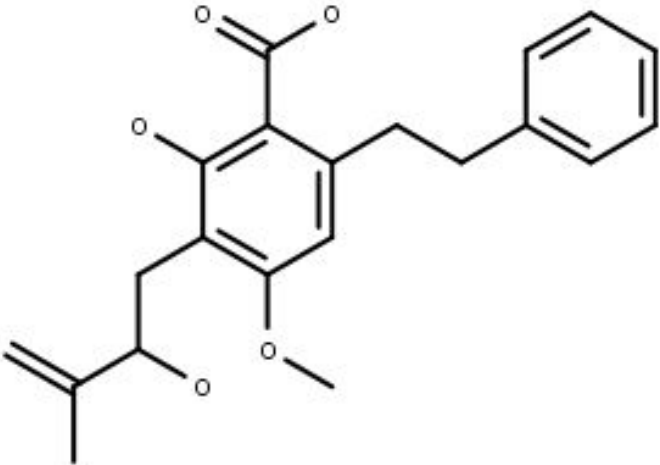 <p>The structure of Amorfrutin-3 consists of a central benzene ring with a carboxylate group (-COO-) at the top position. Moving clockwise from the carboxylate group, there is a propyl chain ending in a phenyl ring, a methoxy group (-OCH3), and a side chain consisting of a methylene group (-CH2-) attached to a carbon atom that is also bonded to a methyl group (-CH3) and a vinyl group (-CH=CH2).</p>                                                                                                                                               |
| C137 | Amorfrutin-4 |  <p>The structure of Amorfrutin-4 features a central benzene ring with a carboxylate group (-COO-) at the top position. Moving clockwise from the carboxylate group, there is a propyl chain ending in a phenyl ring, a methoxy group (-OCH3), and a side chain consisting of a methylene group (-CH2-) attached to a carbon atom that is part of a branched chain. This carbon is also bonded to a methyl group (-CH3) and is connected to a chain that includes another methylene group (-CH2-), a double bond (C=C), and a terminal methyl group (-CH3).</p> |

|      |              |                                                                                                                                                                                                                                                                                                                                                                                                                                                                                                                                                                                   |
|------|--------------|-----------------------------------------------------------------------------------------------------------------------------------------------------------------------------------------------------------------------------------------------------------------------------------------------------------------------------------------------------------------------------------------------------------------------------------------------------------------------------------------------------------------------------------------------------------------------------------|
| C138 | Amorfrutin-A | 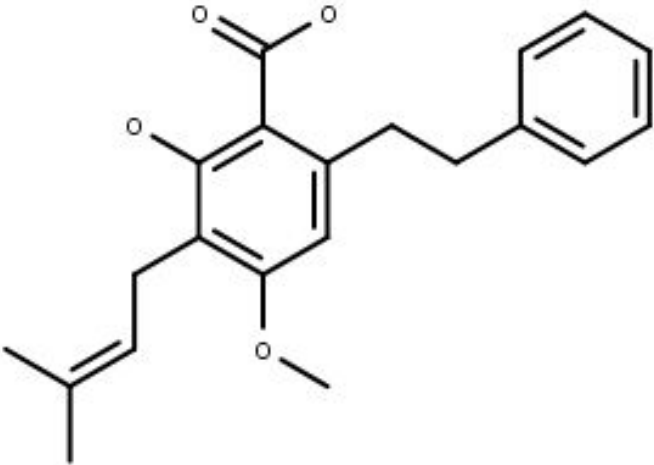 <p>The chemical structure of Amorfrutin-A consists of a central benzene ring. At the 1-position, there is a carboxylate group (-COO-). At the 2-position, there is a methoxy group (-OCH3). At the 3-position, there is a propyl chain (-CH2-CH2-CH2-) that is attached to a phenyl ring. At the 4-position, there is a methoxy group (-OCH3). At the 5-position, there is a propyl chain (-CH2-CH2-CH2-) that is attached to a terminal isoprenoid unit (-CH=C(CH3)2).</p>                    |
| C139 | Amorfrutin-B |  <p>The chemical structure of Amorfrutin-B is similar to Amorfrutin-A, but with a longer side chain. It features a central benzene ring with a carboxylate group (-COO-) at the 1-position, a methoxy group (-OCH3) at the 2-position, a propyl chain (-CH2-CH2-CH2-) at the 3-position attached to a phenyl ring, and a methoxy group (-OCH3) at the 4-position. At the 5-position, there is a pentyl chain (-CH2-CH2-CH2-CH2-CH2-) attached to a terminal isoprenoid unit (-CH=C(CH3)2).</p> |

|      |                        |                                                                                      |
|------|------------------------|--------------------------------------------------------------------------------------|
| C140 | Anethole               | 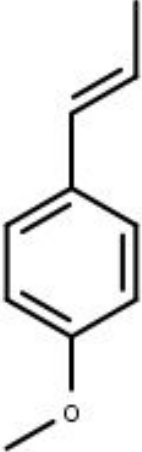    |
| C141 | Anhydrocannabimovone   |   |
| C142 | Anhydrocannabisativine |  |



|      |                         |                                                                                                                                                                                                                                                                                                                                                                                                                                                                                                                 |
|------|-------------------------|-----------------------------------------------------------------------------------------------------------------------------------------------------------------------------------------------------------------------------------------------------------------------------------------------------------------------------------------------------------------------------------------------------------------------------------------------------------------------------------------------------------------|
| C143 | Anthopogochromenic acid | 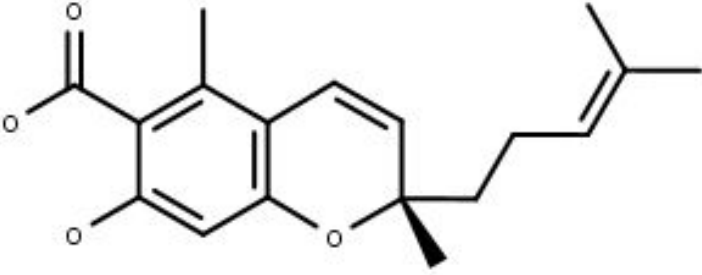 <p>The structure of Anthopogochromenic acid consists of a chromene core. The benzene ring of the chromene is substituted with a methyl group at the 6-position, a methoxycarbonyl group at the 7-position, and a methoxy group at the 8-position. The pyran ring of the chromene is substituted with a methyl group at the 2-position and a prop-1-en-2-yl side chain at the 3-position.</p>                                 |
| C144 | Anthopogocycloic acid   |  <p>The structure of Anthopogocycloic acid features a chromene core. The benzene ring is substituted with a methyl group at the 6-position, a methoxycarbonyl group at the 7-position, and a methoxy group at the 8-position. The pyran ring is substituted with a methyl group at the 2-position and a complex polycyclic side chain at the 3-position, which includes a cyclopentane ring fused to the chromene system.</p> |
| C145 | Apigenin                |  <p>The structure of Apigenin is a flavone. It consists of a chromone core with a 4'-methoxyphenyl group attached to the 2-position of the pyrone ring. The benzene ring of the chromone is substituted with methoxy groups at the 6 and 7 positions.</p>                                                                                                                                                                    |

|      |             |                                                                                                                                                                                                                                                                                                                                                                                                                                                              |
|------|-------------|--------------------------------------------------------------------------------------------------------------------------------------------------------------------------------------------------------------------------------------------------------------------------------------------------------------------------------------------------------------------------------------------------------------------------------------------------------------|
| C146 | Arachidin-3 | 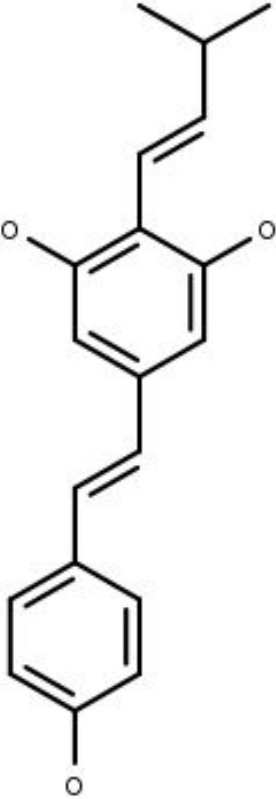 <p>The chemical structure of Arachidin-3 consists of a central benzene ring substituted with two methoxy groups (O) at the 3 and 5 positions. This central ring is connected via a trans-vinyl bridge to a para-substituted phenyl ring that has a methoxy group (O) at the 4 position. The other end of the trans-vinyl bridge is connected to an isopropenyl group.</p> |
| C147 | Araphyn-1   |  <p>The chemical structure of Araphyn-1 is identical to Arachidin-3, featuring a central benzene ring with methoxy groups at the 3 and 5 positions, a trans-vinyl bridge to a para-substituted phenyl ring with a methoxy group at the 4 position, and an isopropenyl group at the other end of the bridge.</p>                                                           |

|      |           |                                                                                                                                                                                                                                                                                                                                                                                                                                                                                                                  |
|------|-----------|------------------------------------------------------------------------------------------------------------------------------------------------------------------------------------------------------------------------------------------------------------------------------------------------------------------------------------------------------------------------------------------------------------------------------------------------------------------------------------------------------------------|
| C148 | Araphyn-3 | 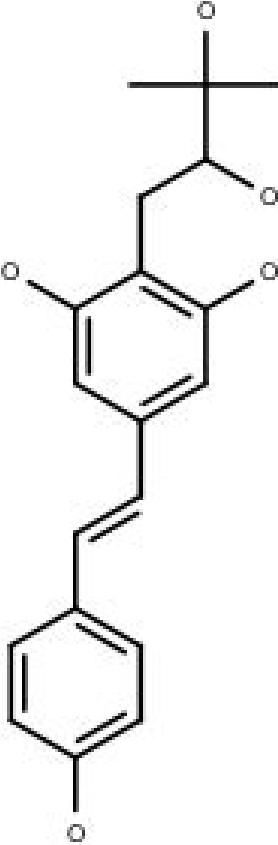 <p>The structure of Araphyn-3 consists of a central benzene ring with two hydroxyl groups at the 3 and 5 positions. This central ring is connected at the 1 position to a propyl chain that ends in a tert-butyl group. At the 4 position of the central ring, there is a trans-stilbene-like side chain consisting of a double bond connected to a para-substituted phenyl ring with a hydroxyl group at the 4 position.</p> |
| C149 | Araphyn-4 |  <p>The structure of Araphyn-4 is similar to Araphyn-3, but the phenyl ring at the end of the side chain is unsubstituted.</p>                                                                                                                                                                                                                                                                                                |

|      |               |                                                                                     |
|------|---------------|-------------------------------------------------------------------------------------|
| C150 | Aristolene    | 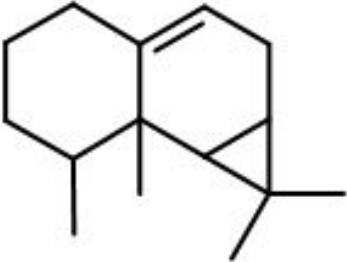   |
| C151 | Aromadendrene |    |
| C152 | Benzaldehyde  |   |
| C153 | Benzonitrile  |  |

|      |                |                                                                                                                                                                                                                                                                                                                                   |
|------|----------------|-----------------------------------------------------------------------------------------------------------------------------------------------------------------------------------------------------------------------------------------------------------------------------------------------------------------------------------|
| C154 | Benzophenone   | 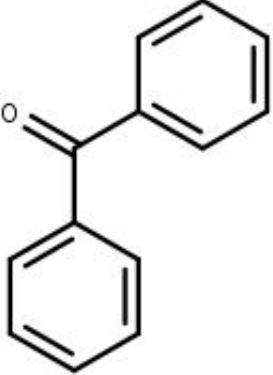 <p>The structure shows two benzene rings connected by a central carbonyl group (C=O). One benzene ring is positioned above the carbonyl carbon, and the other is below it.</p>                                                                  |
| C155 | Benzphetamine  |  <p>The structure features a central nitrogen atom bonded to a methyl group, a benzyl group (a benzene ring attached to a methylene group), and a 1-phenylethyl group (a chiral carbon atom bonded to a methyl group and a benzene ring).</p>   |
| C156 | Benzyl acetate |  <p>The structure consists of a benzene ring attached to a methylene group, which is further connected to an oxygen atom. This oxygen atom is part of an acetate group, specifically bonded to a carbonyl carbon (C=O) and a methyl group.</p> |

|      |                      |                                                                                     |
|------|----------------------|-------------------------------------------------------------------------------------|
| C157 | Benzyl Alcohol       | 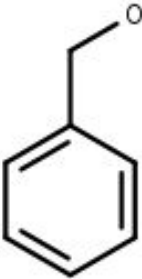   |
| C158 | Benzyl formate       |    |
| C159 | Benzyl Nitrile       |   |
| C160 | Beta-Cannabispiranol |  |

|      |                          |                                                                                                                                                                                                                                                                                                                                                                                                                          |
|------|--------------------------|--------------------------------------------------------------------------------------------------------------------------------------------------------------------------------------------------------------------------------------------------------------------------------------------------------------------------------------------------------------------------------------------------------------------------|
| C161 | Beta-Caryophyllene oxide | 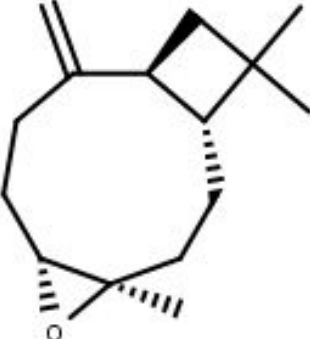 <p>The structure shows a bicyclic system consisting of a nine-membered ring fused to a five-membered ring. The five-membered ring contains an oxygen atom (epoxide). There are two gem-dimethyl groups on the five-membered ring and a methyl group on the nine-membered ring. A double bond is located on the nine-membered ring.</p> |
| C162 | Beta-Caryophyllene       |  <p>The structure shows a bicyclic system consisting of a nine-membered ring fused to a five-membered ring. There are two gem-dimethyl groups on the five-membered ring and a methyl group on the nine-membered ring. A double bond is located on the nine-membered ring.</p>                                                           |
| C163 | Beta-Cedrene             |  <p>The structure shows a complex polycyclic system with a bicyclic core and a fused six-membered ring. It features two gem-dimethyl groups on the bicyclic core and a methyl group on the six-membered ring. A double bond is located on the six-membered ring.</p>                                                                   |
| C164 | Beta-Elemene             |  <p>The structure shows a bicyclic system consisting of a six-membered ring fused to a six-membered ring. It features two gem-dimethyl groups on the six-membered ring and a methyl group on the other six-membered ring. A double bond is located on the six-membered ring.</p>                                                      |

|      |                                              |                                                                                      |
|------|----------------------------------------------|--------------------------------------------------------------------------------------|
| C165 | Beta-Eudesmol                                | 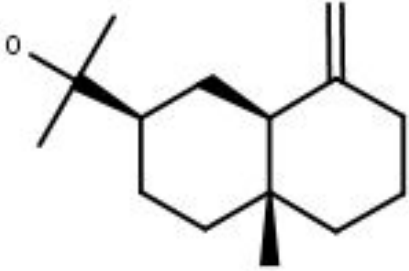   |
| C166 | Beta-fenchol (Beta-Fenchyl Alcohol)          |     |
| C167 | Beta-Fenchyl-Delta-9-tetrahydrocannabinolate |   |
| C168 | Betahistine                                  |  |



|      |                   |                                                                                      |
|------|-------------------|--------------------------------------------------------------------------------------|
| C169 | Beta-Irone        | 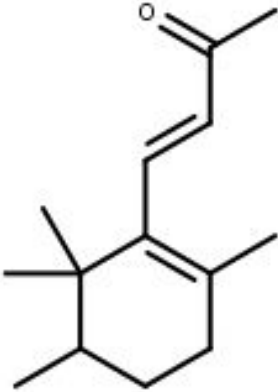    |
| C170 | Beta-phellandrene |     |
| C171 | Beta-Pinene       |   |
| C172 | Beta-Selinene     |  |

|      |                                                            |                                                                                     |
|------|------------------------------------------------------------|-------------------------------------------------------------------------------------|
| C173 | $\beta$ -sitosteryl-3-O-b-D-glucopyranoside-2'-O-palmitate | 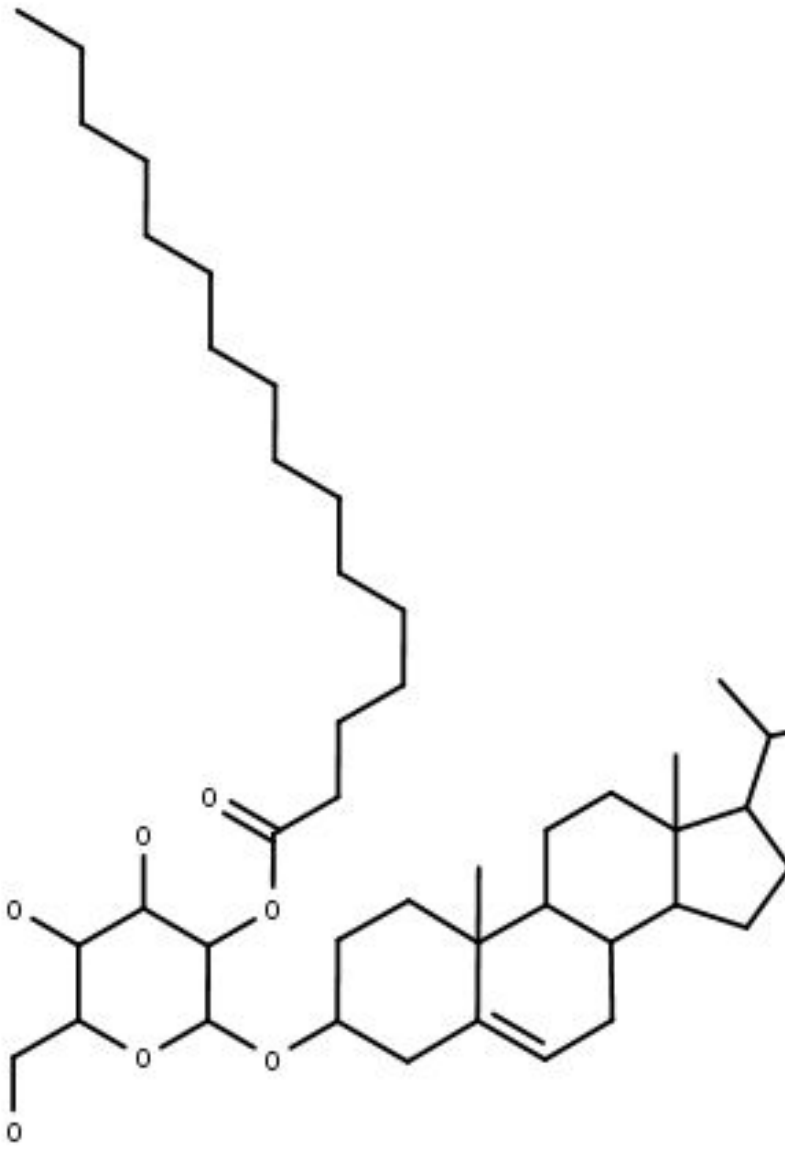 |
| C174 | Betazole                                                   |  |

|      |                              |                                                                                                                                                                                                                                                                                                                                                                                                                                                                                                                             |
|------|------------------------------|-----------------------------------------------------------------------------------------------------------------------------------------------------------------------------------------------------------------------------------------------------------------------------------------------------------------------------------------------------------------------------------------------------------------------------------------------------------------------------------------------------------------------------|
| C175 | Bis-nor-cannabichromanone    | 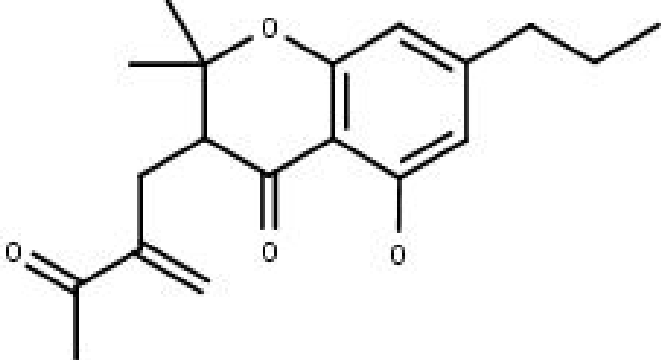 <p>The structure shows a bicyclic core consisting of a benzene ring fused to a six-membered ring containing an oxygen atom. The benzene ring has a propyl group at the 1-position and a methoxy group at the 3-position. The six-membered ring has a carbonyl group at the 2-position and a side chain at the 4-position. The side chain consists of a methylene group, a carbon-carbon double bond, and a methyl group.</p>             |
| C176 | Bis-nor-cannabielsoic acid B |  <p>The structure shows a complex polycyclic system with a benzene ring fused to a six-membered ring containing an oxygen atom. The benzene ring has a propyl group at the 1-position and a carboxylic acid group at the 3-position. The six-membered ring has a carbonyl group at the 2-position and a side chain at the 4-position. The side chain consists of a methylene group, a carbon-carbon double bond, and a methyl group.</p> |
| C177 | Bis-nor-cannabielsoin        |  <p>The structure shows a complex polycyclic system with a benzene ring fused to a six-membered ring containing an oxygen atom. The benzene ring has a propyl group at the 1-position and a methoxy group at the 3-position. The six-membered ring has a carbonyl group at the 2-position and a side chain at the 4-position. The side chain consists of a methylene group, a carbon-carbon double bond, and a methyl group.</p>        |
| C178 | Bis-nor-cannabitriol         |  <p>The structure shows a complex polycyclic system with a benzene ring fused to a six-membered ring containing an oxygen atom. The benzene ring has a propyl group at the 1-position and a methoxy group at the 3-position. The six-membered ring has a carbonyl group at the 2-position and a side chain at the 4-position. The side chain consists of a methylene group, a carbon-carbon double bond, and a methyl group.</p>        |

|      |                                        |                                                                                      |
|------|----------------------------------------|--------------------------------------------------------------------------------------|
| C179 | Borneol                                | 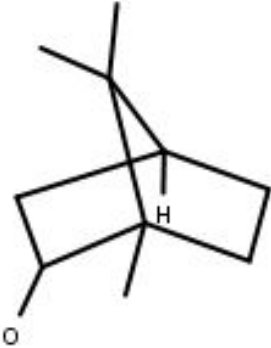    |
| C180 | Bornyl Delta-9-tetrahydrocannabinolate |   |
| C181 | Butane                                 |   |
| C182 | Butyl formate                          |  |

|      |                                  |                                                                                                                                                                                                                                                                                                                                                                                                                                                                                                                                                                                                               |
|------|----------------------------------|---------------------------------------------------------------------------------------------------------------------------------------------------------------------------------------------------------------------------------------------------------------------------------------------------------------------------------------------------------------------------------------------------------------------------------------------------------------------------------------------------------------------------------------------------------------------------------------------------------------|
| C183 | Gamma-Cadinyl<br>Cannabigerolate | 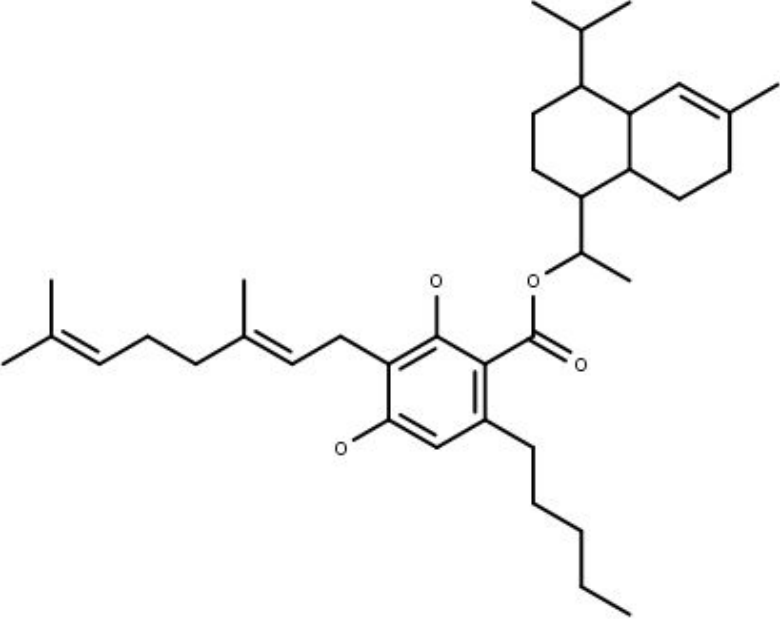 <p>The structure shows a central benzene ring with two methoxy groups (-OCH<sub>3</sub>) at the 1 and 3 positions. It is substituted with a propyl chain at the 4 position, a propyl chain with a terminal methyl group at the 5 position, and a propyl chain with a terminal methyl group at the 6 position. A side chain is attached to the 2 position, consisting of an ester linkage (-COO-) to a chiral carbon, which is further connected to a bicyclic system (gamma-cadinane) with a methyl group on the ring.</p> |
| C184 | Calarene                         |  <p>The structure is a bicyclic system consisting of two fused six-membered rings. It features a double bond in one of the rings and several methyl groups attached to the carbon skeleton, with some methyl groups shown with wedged or dashed bonds to indicate stereochemistry.</p>                                                                                                                                                                                                                                      |
| C185 | Camphene                         |  <p>The structure is a bicyclic system consisting of two fused six-membered rings. It features a double bond in one of the rings and several methyl groups attached to the carbon skeleton. Two hydrogen atoms are explicitly labeled with 'H' and shown with wedged bonds to indicate stereochemistry.</p>                                                                                                                                                                                                                |
| C186 | Cannabichromanone (CBCF)         |  <p>The structure is a complex bicyclic system. It features a benzene ring fused to a six-membered ring containing an oxygen atom. The benzene ring has a methyl group and a propyl chain. The six-membered ring has a carbonyl group (=O) and a methyl group. A side chain is attached to the six-membered ring, consisting of a carbonyl group (=O) and a propyl chain.</p>                                                                                                                                             |

|      |                              |                                                                                                                                                                                                                                                                                                                                                                                                                                                                                                      |
|------|------------------------------|------------------------------------------------------------------------------------------------------------------------------------------------------------------------------------------------------------------------------------------------------------------------------------------------------------------------------------------------------------------------------------------------------------------------------------------------------------------------------------------------------|
| C187 | Cannabichromenone D          | 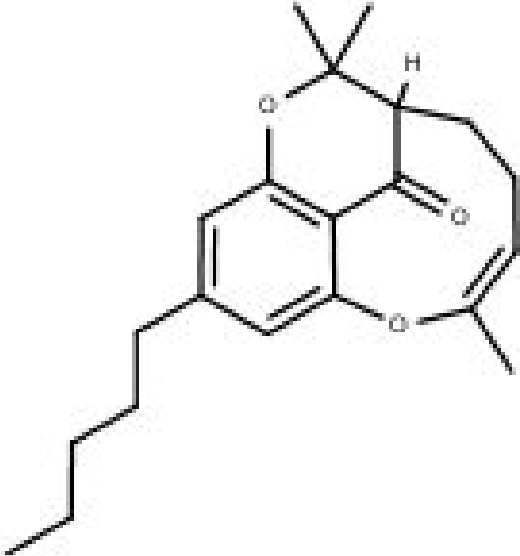 <p>The structure of Cannabichromenone D (CBCD) is a complex polycyclic molecule. It features a central benzene ring fused to a six-membered ring containing an oxygen atom. This is further fused to a seven-membered ring with a ketone group and a hydrogen atom explicitly shown. A long, branched alkyl chain is attached to the benzene ring, and a methyl group is attached to the seven-membered ring.</p> |
| C188 | Cannabichromene (CBC)        |  <p>The structure of Cannabichromene (CBC) consists of a benzene ring fused to a six-membered ring with an oxygen atom. The benzene ring has a long, branched alkyl chain and a ketone group. The six-membered ring has a methyl group and a long, branched alkyl chain with a terminal double bond.</p>                                                                                                          |
| C189 | Cannabichromenic acid (CBCA) |  <p>The structure of Cannabichromenic acid (CBCA) is similar to CBC but with a carboxylic acid group instead of a ketone group on the benzene ring. It also features a long, branched alkyl chain and a methyl group on the six-membered ring.</p>                                                                                                                                                               |

|      |                                   |                                                                                                                                                                                                                                                                                                                                                                                           |
|------|-----------------------------------|-------------------------------------------------------------------------------------------------------------------------------------------------------------------------------------------------------------------------------------------------------------------------------------------------------------------------------------------------------------------------------------------|
| C190 | Cannabichromevarin (CBCV)         | <p>The structure of Cannabichromevarin (CBCV) consists of a central benzene ring substituted with a propyl group at the bottom, two methoxy groups at the 2 and 6 positions, and a side chain at the 1 position. The side chain is a 4-methylphenyl ring substituted with an isopropenyl group at the 3-position.</p>                                                                     |
| C191 | Cannabichromevarinic acid (CBCVA) | <p>The structure of Cannabichromevarinic acid (CBCVA) is similar to CBCV but includes a carboxylic acid group at the 4-position of the central benzene ring. The side chain is a 4-methylphenyl ring substituted with an isopropenyl group at the 3-position.</p>                                                                                                                         |
| C192 | Cannabicitran                     | <p>The structure of Cannabicitran features a central benzene ring with a pentyl group at the bottom, two methoxy groups at the 2 and 6 positions, and a side chain at the 1 position. The side chain is a bicyclic system consisting of a five-membered ring fused to a six-membered ring, with a methyl group on the five-membered ring and a propyl group on the six-membered ring.</p> |

|      |                             |                                                                                                                                                                                                                                                                                                                                                                                                                                                                                                                              |
|------|-----------------------------|------------------------------------------------------------------------------------------------------------------------------------------------------------------------------------------------------------------------------------------------------------------------------------------------------------------------------------------------------------------------------------------------------------------------------------------------------------------------------------------------------------------------------|
| C193 | Cannabicoumaronone          | 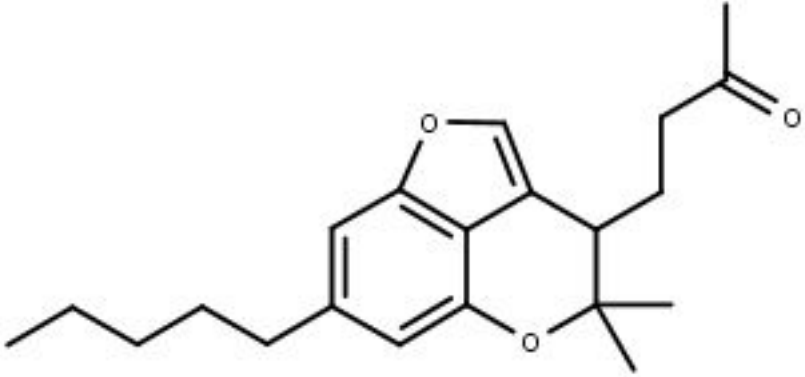 <p>The structure of Cannabicoumaronone features a central benzene ring. At the 1-position, there is a five-membered furan ring fused to the benzene ring. At the 3-position, there is a propyl chain ending in an acetyl group (-COCH<sub>3</sub>). At the 4-position, there is a pentyl chain (-C<sub>5</sub>H<sub>11</sub>). At the 5-position, there is a quaternary carbon atom bonded to two methyl groups and the benzene ring.</p> |
| C194 | Cannabicyclol (CBL)         |  <p>The structure of Cannabicyclol (CBL) consists of a central benzene ring. At the 1-position, there is a bicyclic system (a decalin derivative) fused to the benzene ring. At the 3-position, there is a pentyl chain (-C<sub>5</sub>H<sub>11</sub>). At the 4-position, there is a carbonyl group (=O). At the 5-position, there is a quaternary carbon atom bonded to two methyl groups and the benzene ring.</p>                      |
| C195 | Cannabicyclolic acid (CBLA) |  <p>The structure of Cannabicyclolic acid (CBLA) is similar to Cannabicyclol (CBL). It features a central benzene ring with a bicyclic system at the 1-position, a pentyl chain at the 3-position, a carbonyl group at the 4-position, and a quaternary carbon at the 5-position bonded to two methyl groups. The difference is the presence of a propyl chain at the 2-position of the benzene ring.</p>                                |



|      |                          |                                                                                                                                                                                                                                                                                                                                                                                                                                                                                             |
|------|--------------------------|---------------------------------------------------------------------------------------------------------------------------------------------------------------------------------------------------------------------------------------------------------------------------------------------------------------------------------------------------------------------------------------------------------------------------------------------------------------------------------------------|
| C196 | Cannabicyclovarin (CBLV) | 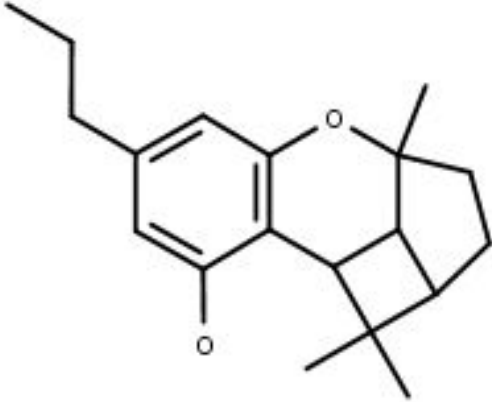 <p>The chemical structure of Cannabicyclovarin (CBLV) consists of a benzene ring with a propyl group at the 4-position and a methoxy group at the 3-position. This benzene ring is fused to a bicyclic system, specifically a bicyclo[2.2.1]heptane ring system with two methyl groups attached to the bridgehead carbons. An oxygen atom is part of a five-membered ring fused to the benzene ring.</p> |
| C197 | Cannabidiol (CBD)        |  <p>The chemical structure of Cannabidiol (CBD) features a central benzene ring with two methoxy groups at the 3 and 5 positions and a pentyl group at the 1 position. This benzene ring is connected via a dashed bond to a cyclohexene ring. The cyclohexene ring has a methyl group at the 4-position and a propenyl group at the 2-position.</p>                                                      |

|      |                                    |                                                                                    |
|------|------------------------------------|------------------------------------------------------------------------------------|
| C198 | Cannabidiolic acid (CBDA)          | 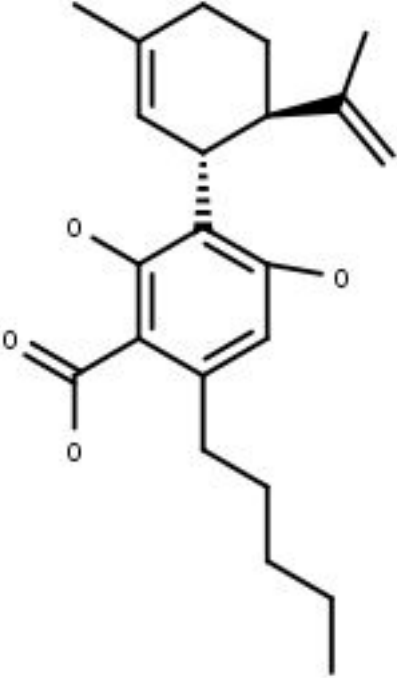 |
| C199 | Cannabidiol monomethylether (CBDM) |  |

|      |                      |                                                                                    |
|------|----------------------|------------------------------------------------------------------------------------|
| C200 | Cannabidiol (CBD-C1) | 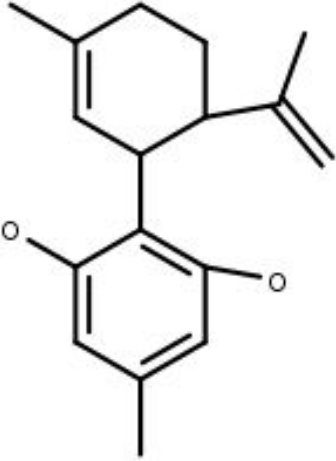  |
| C201 | Cannabidiol (CBDV)   |  |

|      |                               |                                                                                      |
|------|-------------------------------|--------------------------------------------------------------------------------------|
| C202 | Cannabidivarinic acid (CBDVA) | 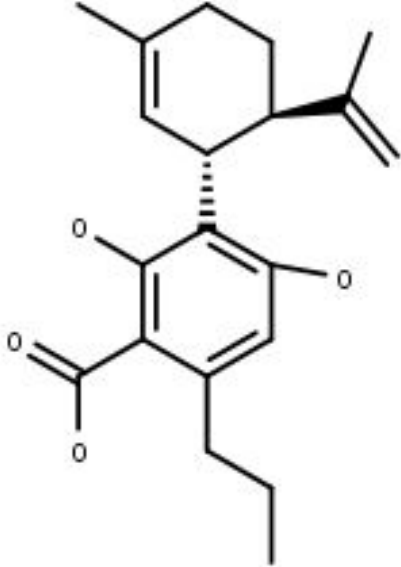   |
| C203 | Cannabielsoic acid B (CBEA-B) |   |
| C204 | Cannabielsoic acid A (CBEA-A) |  |

|      |                     |                                                                                      |
|------|---------------------|--------------------------------------------------------------------------------------|
| C205 | Cannabielsoin (CBE) | 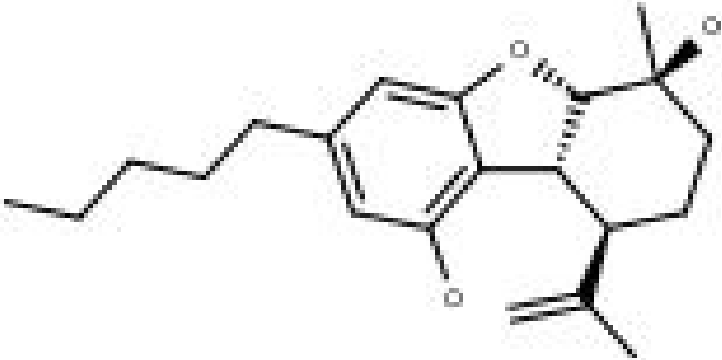   |
| C206 | Cannabiflavin B     |   |
| C207 | Cannabifuran (CBF)  |  |

|      |                                             |                                                                                                                                                                                                                                                                                                                                                                                                    |
|------|---------------------------------------------|----------------------------------------------------------------------------------------------------------------------------------------------------------------------------------------------------------------------------------------------------------------------------------------------------------------------------------------------------------------------------------------------------|
| C208 | Cannabigerol (CBG)                          | <p>The chemical structure of Cannabigerol (CBG) consists of a central benzene ring with two methoxy groups (-OCH<sub>3</sub>) at the 3 and 4 positions. A pentyl chain is attached to the 1 position, and a propyl chain is attached to the 5 position. Both the propyl and pentyl chains are connected to the ring via a propyl chain that is double-bonded to a 2-methylbut-3-en-2-yl group.</p> |
| C209 | Cannabigerolic acid monomethylether (CBGAM) | <p>The chemical structure of Cannabigerolic acid monomethylether (CBGAM) features a central benzene ring with a methyl ester group (-COOCH<sub>3</sub>) at the 1 position, a methoxy group (-OCH<sub>3</sub>) at the 3 position, and a pentyl chain at the 4 position. A propyl chain is attached to the 5 position, which is double-bonded to a 2-methylbut-3-en-2-yl group.</p>                  |

|      |                                     |                                                                                     |
|------|-------------------------------------|-------------------------------------------------------------------------------------|
| C210 | Cannabigerolic acid (CBGA)          | 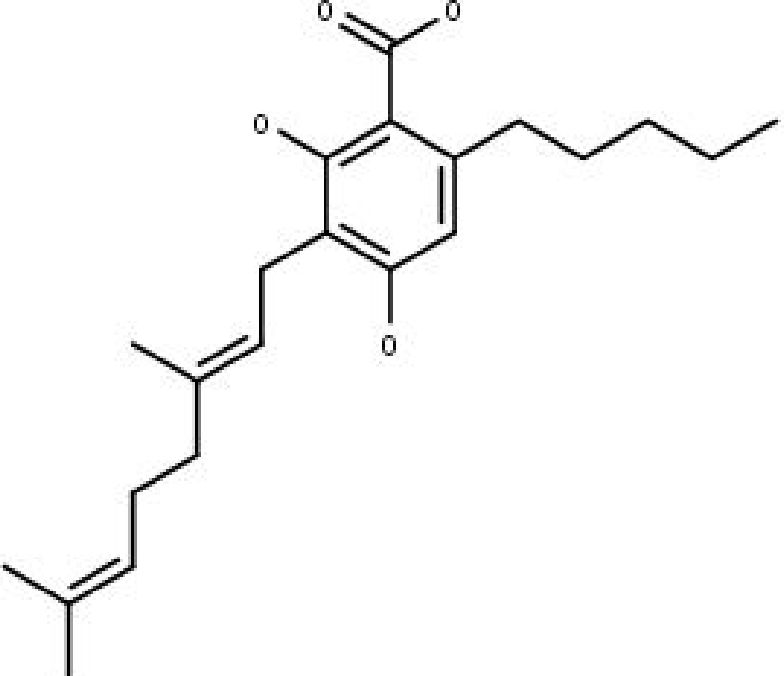  |
| C211 | Cannabigerol monomethylether (CBGM) |  |

C212

Cannabigeronquinone

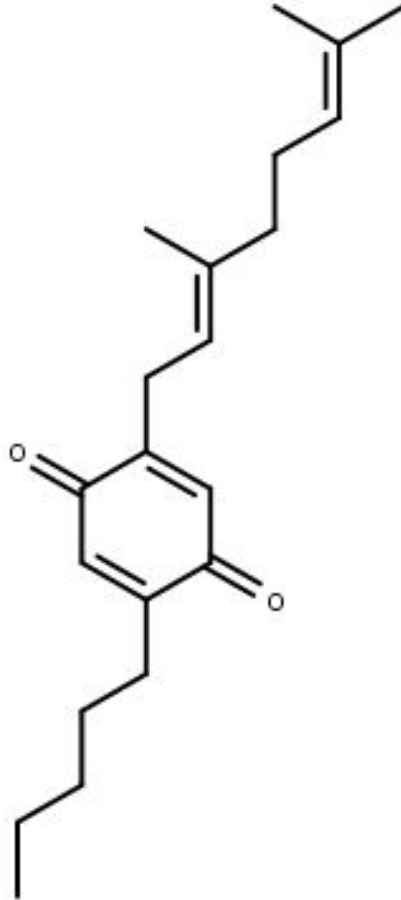



|      |                                 |                                                                                                                                                                                                                                                                                                                                                                                                                                                                                                                                                                                                                          |
|------|---------------------------------|--------------------------------------------------------------------------------------------------------------------------------------------------------------------------------------------------------------------------------------------------------------------------------------------------------------------------------------------------------------------------------------------------------------------------------------------------------------------------------------------------------------------------------------------------------------------------------------------------------------------------|
| C213 | Cannabigerovarin (CBGV)         | <p>The chemical structure of Cannabigerovarin (CBGV) consists of a central benzene ring with two methoxy groups (-OCH<sub>3</sub>) at the 3 and 4 positions. A propyl chain (-CH<sub>2</sub>CH<sub>2</sub>CH<sub>3</sub>) is attached at the 1 position. Two side chains are attached at the 2 position: one is a propyl chain (-CH<sub>2</sub>CH<sub>2</sub>CH<sub>3</sub>) and the other is a pentyl chain (-CH<sub>2</sub>CH<sub>2</sub>CH<sub>2</sub>CH<sub>2</sub>CH<sub>3</sub>) that is branched with a methyl group at the terminal end.</p>                                                                     |
| C214 | Cannabigerovarinic acid (CBGVA) | <p>The chemical structure of Cannabigerovarinic acid (CBGVA) features a central benzene ring with two methoxy groups (-OCH<sub>3</sub>) at the 3 and 4 positions. A propyl chain (-CH<sub>2</sub>CH<sub>2</sub>CH<sub>3</sub>) is attached at the 1 position. A carboxylic acid group (-COOH) is attached at the 2 position. Two side chains are attached at the 3 position: one is a propyl chain (-CH<sub>2</sub>CH<sub>2</sub>CH<sub>3</sub>) and the other is a pentyl chain (-CH<sub>2</sub>CH<sub>2</sub>CH<sub>2</sub>CH<sub>2</sub>CH<sub>3</sub>) that is branched with a methyl group at the terminal end.</p> |

|      |                |                                                                                                                                                                                                                                                                                                                                                                                                                                           |
|------|----------------|-------------------------------------------------------------------------------------------------------------------------------------------------------------------------------------------------------------------------------------------------------------------------------------------------------------------------------------------------------------------------------------------------------------------------------------------|
| C215 | Cannabiglendol | 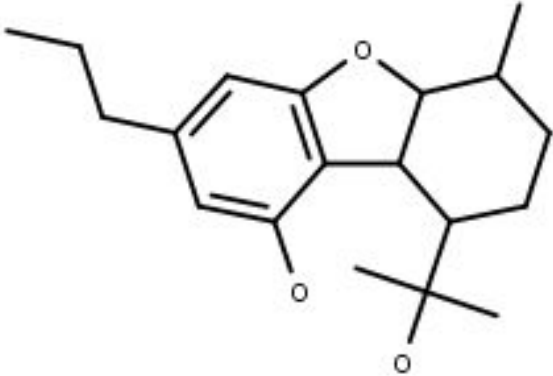 <p>The chemical structure of Cannabiglendol consists of a benzofuran core. The benzene ring of the benzofuran is substituted with a propyl group at the 6-position and a methoxy group at the 7-position. The furan ring is fused to a cyclohexane ring, which has a methyl group at the 1-position and a 2-methylpropoxy group at the 4-position.</p> |
| C216 | Cannabimovone  |  <p>The chemical structure of Cannabimovone features a central benzene ring with methoxy groups at the 3 and 4 positions. This benzene ring is connected at the 1-position to a five-membered ring containing two methoxy groups and two methyl groups. A pentyl chain is attached to the benzene ring at the 5-position.</p>                           |

|      |                   |                                                                                                                                                                                                                                                                                                                                                                                                                                |
|------|-------------------|--------------------------------------------------------------------------------------------------------------------------------------------------------------------------------------------------------------------------------------------------------------------------------------------------------------------------------------------------------------------------------------------------------------------------------|
| C217 | Cannabinol        | 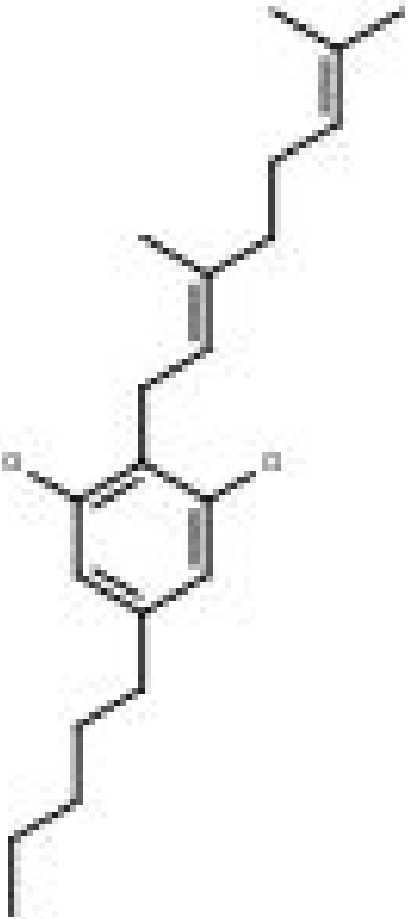 <p>The chemical structure of Cannabinol (C217) features a central benzene ring with two chlorine atoms at the 1 and 3 positions. It has a propyl chain at the 4 position and two side chains at the 5 position: one is a pentyl chain, and the other is a side chain containing two trans double bonds and a terminal isopropyl group.</p> |
| C218 | Cannabinolic acid |  <p>The chemical structure of Cannabinolic acid (C218) features a central benzene ring with two chlorine atoms at the 1 and 3 positions. It has a propyl chain at the 4 position, a carboxylic acid group at the 5 position, and a side chain at the 6 position containing two trans double bonds and a terminal isopropyl group.</p>      |

|      |                         |                                                                                                                                                                                                                                                                                                                                                                                                                   |
|------|-------------------------|-------------------------------------------------------------------------------------------------------------------------------------------------------------------------------------------------------------------------------------------------------------------------------------------------------------------------------------------------------------------------------------------------------------------|
| C219 | Cannabinodiol (CBND)    | <p>The chemical structure of Cannabinodiol (CBND) consists of two benzene rings connected by a single bond. The upper ring is substituted with a methyl group at the 3-position and an isopropenyl group at the 4-position. The lower ring is substituted with two hydroxyl groups at the 3 and 5 positions and a propyl chain at the 1-position.</p> <chem>CC1=CC=C(C=C1)C(C)=C2C=CC(=C2)OCC3=CC=C(C=C3)O</chem> |
| C220 | Cannabinodivarin (CBVD) | <p>The chemical structure of Cannabinodivarin (CBVD) is identical to that of Cannabinodiol (CBND), featuring two benzene rings with a methyl and isopropenyl group on the top ring, and two hydroxyl groups and a propyl chain on the bottom ring.</p> <chem>CC1=CC=C(C=C1)C(C)=C2C=CC(=C2)OCC3=CC=C(C=C3)O</chem>                                                                                                |

|      |                               |                                                                                      |
|------|-------------------------------|--------------------------------------------------------------------------------------|
| C221 | Cannabinol methylether (CBNM) | 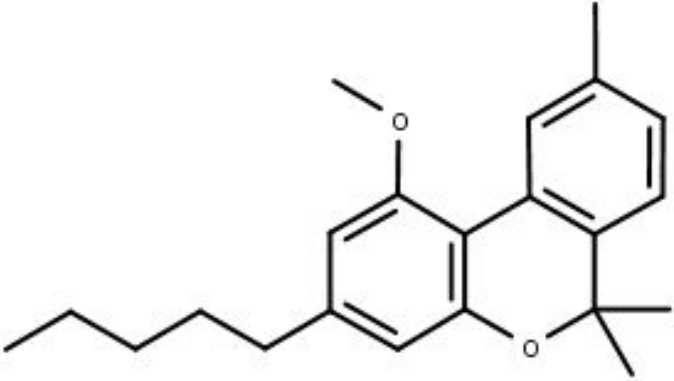   |
| C222 | Cannabinol (CBN)              |   |
| C223 | Cannabinol-C2 (CBN-C2)        |  |

|      |                          |                                                                                      |
|------|--------------------------|--------------------------------------------------------------------------------------|
| C224 | Cannabinol-C4 (CBN-C4)   | 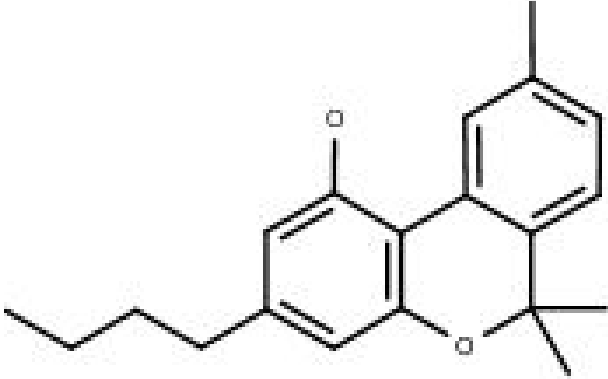   |
| C225 | Cannabinolic acid (CBNA) |   |
| C226 | Cannabiorcol (CBN-C1)    |  |

|      |                            |                                                                                                                                                                                                                                                                                                                                                                                                                                                                                                                         |
|------|----------------------------|-------------------------------------------------------------------------------------------------------------------------------------------------------------------------------------------------------------------------------------------------------------------------------------------------------------------------------------------------------------------------------------------------------------------------------------------------------------------------------------------------------------------------|
| C227 | Cannabiorcicchromene       | 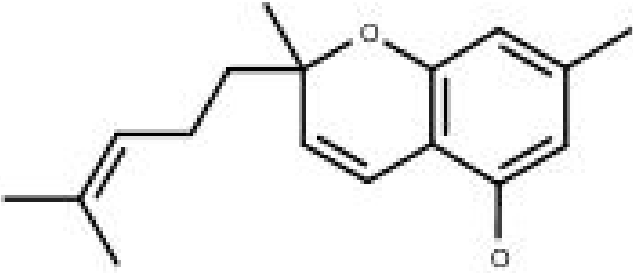 <p>The structure of Cannabiorcicchromene consists of a chromene core. The benzene ring of the chromene is substituted with a methyl group at the 6-position and a chlorine atom at the 7-position. The pyran ring is substituted with a methyl group at the 2-position and a prop-1-en-2-yl group at the 3-position.</p>                                                                                                             |
| C228 | Cannabiorcicchromenic acid |  <p>The structure of Cannabiorcicchromenic acid features a chromene core. The benzene ring is substituted with a methyl group at the 6-position, a chlorine atom at the 7-position, and a prop-1-en-2-yl group at the 8-position. The pyran ring is substituted with a methyl group at the 2-position and a prop-1-en-2-yl group at the 3-position. A carboxylic acid group is attached to the 4-position of the benzene ring.</p>    |
| C229 | Cannabiorcicitran          |  <p>The structure of Cannabiorcicitran is a complex polycyclic system. It features a chromene core where the pyran ring is fused to a bicyclic system. The benzene ring is substituted with a methyl group at the 6-position and a chlorine atom at the 7-position. The pyran ring is substituted with a methyl group at the 2-position. The bicyclic system includes a hydrogen atom explicitly shown at a bridgehead position.</p> |
| C230 | Cannabiorcicyclol          |  <p>The structure of Cannabiorcicyclol is a complex polycyclic system. It features a chromene core where the pyran ring is fused to a bicyclic system. The benzene ring is substituted with a methyl group at the 6-position and a chlorine atom at the 7-position. The pyran ring is substituted with a methyl group at the 2-position. The bicyclic system is fused to the pyran ring at the 3-position.</p>                      |

|      |                        |                                                                                                                                                                                                                                                                                                                                                                                                                                                                                                                                                                                                                               |
|------|------------------------|-------------------------------------------------------------------------------------------------------------------------------------------------------------------------------------------------------------------------------------------------------------------------------------------------------------------------------------------------------------------------------------------------------------------------------------------------------------------------------------------------------------------------------------------------------------------------------------------------------------------------------|
| C231 | Cannabiorcyclolic acid | 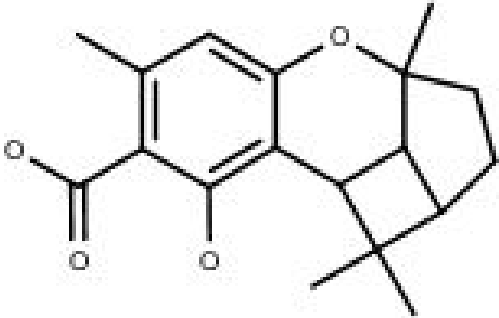 <p>The structure of Cannabiorcyclolic acid is a complex polycyclic molecule. It features a central benzene ring with a methyl group at the 1-position and a propyl group at the 3-position. The benzene ring is fused to a seven-membered ring containing an oxygen atom. This seven-membered ring is further fused to a bicyclic system consisting of a six-membered ring and a five-membered ring, both containing oxygen atoms. The molecule has several methyl groups and a carboxylic acid group attached to the bicyclic system.</p> |
| C232 | Cannabioxepane         |  <p>The structure of Cannabioxepane is a complex polycyclic molecule. It features a central benzene ring with a methyl group at the 1-position and a propyl group at the 3-position. The benzene ring is fused to a seven-membered ring containing an oxygen atom. This seven-membered ring is further fused to a bicyclic system consisting of a six-membered ring and a five-membered ring, both containing oxygen atoms. The molecule has several methyl groups and a carboxylic acid group attached to the bicyclic system.</p>         |
| C233 | Cannabiripsol (CBR)    |  <p>The structure of Cannabiripsol (CBR) is a complex polycyclic molecule. It features a central benzene ring with a methyl group at the 1-position and a propyl group at the 3-position. The benzene ring is fused to a seven-membered ring containing an oxygen atom. This seven-membered ring is further fused to a bicyclic system consisting of a six-membered ring and a five-membered ring, both containing oxygen atoms. The molecule has several methyl groups and a carboxylic acid group attached to the bicyclic system.</p>  |



|      |                  |                                                                                                                                                                                                                                                                                                                                                                                                                                                                                                                             |
|------|------------------|-----------------------------------------------------------------------------------------------------------------------------------------------------------------------------------------------------------------------------------------------------------------------------------------------------------------------------------------------------------------------------------------------------------------------------------------------------------------------------------------------------------------------------|
| C234 | Cannabissativine | 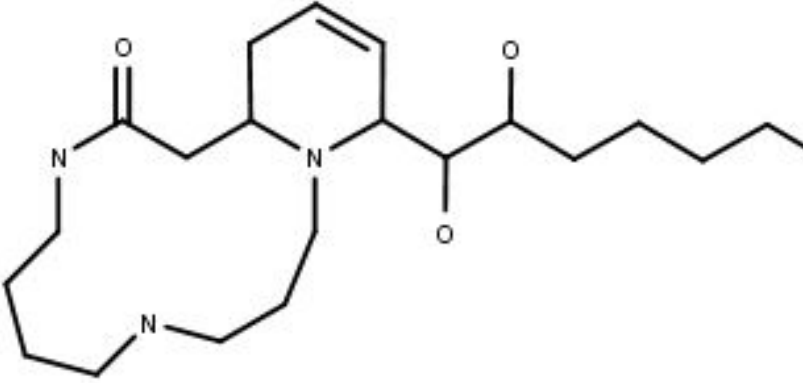 <p>The chemical structure of Cannabissativine is a complex polycyclic molecule. It features a central bicyclic core consisting of a piperidine ring fused to a pyridine ring. This core is substituted with a long-chain alkyl group (heptyl) and a side chain containing a carbonyl group and another nitrogen atom. The nitrogen atom is part of a larger ring system that includes a carbonyl group and a long-chain alkyl group.</p> |
| C235 | Cannabisin-A     |  <p>The chemical structure of Cannabisin-A is a complex polycyclic molecule. It features a central bicyclic core consisting of a piperidine ring fused to a pyridine ring. This core is substituted with a long-chain alkyl group (heptyl) and a side chain containing a carbonyl group and another nitrogen atom. The nitrogen atom is part of a larger ring system that includes a carbonyl group and a long-chain alkyl group.</p>    |

C236

Cannabisin-B

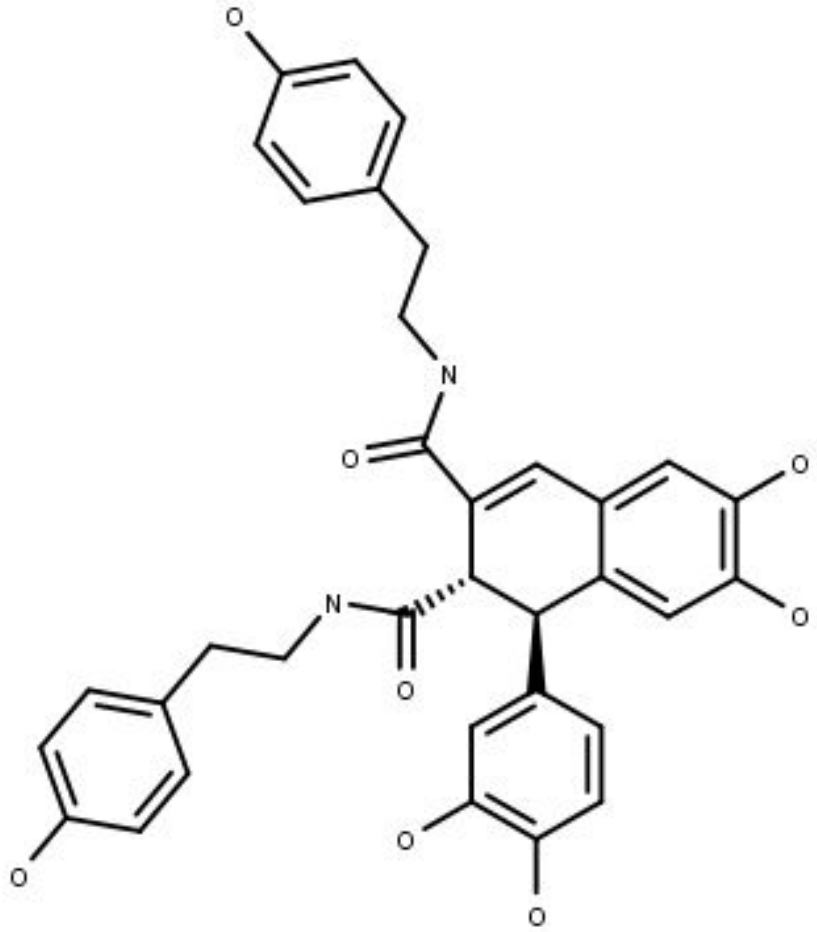

C237

Cannabisin-C

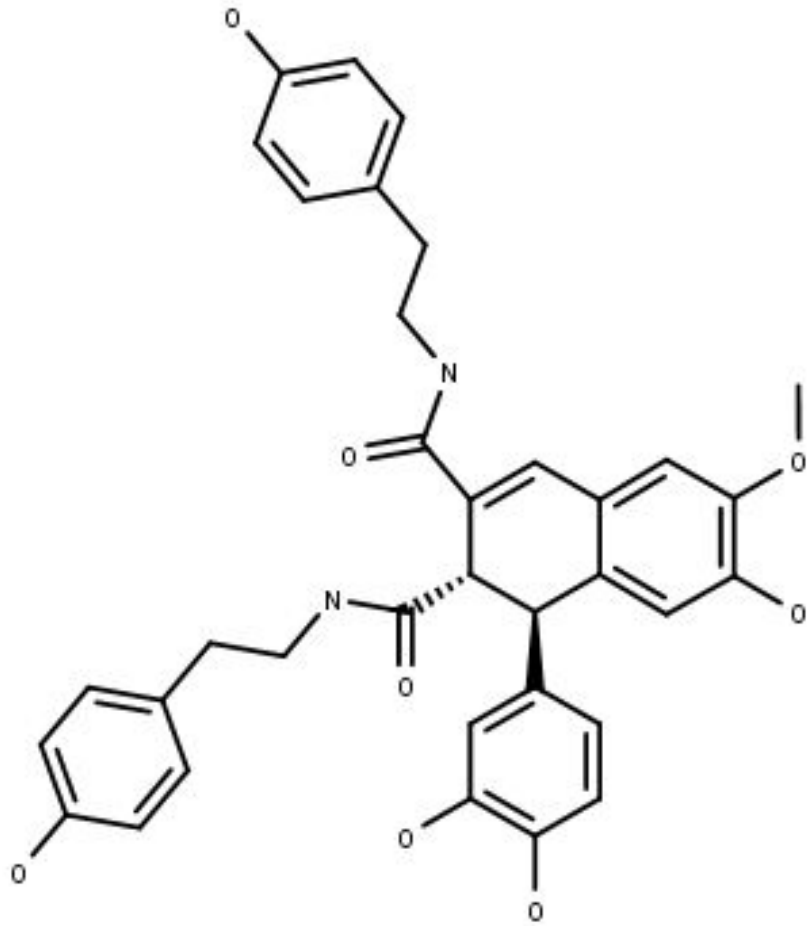

|      |                |                                                                                                                                                                                                                                                                                                                                                                                                                                                                                                                                                                                                                                                                                                                                                                                                                                                                                                                                                                                                                                                                                               |
|------|----------------|-----------------------------------------------------------------------------------------------------------------------------------------------------------------------------------------------------------------------------------------------------------------------------------------------------------------------------------------------------------------------------------------------------------------------------------------------------------------------------------------------------------------------------------------------------------------------------------------------------------------------------------------------------------------------------------------------------------------------------------------------------------------------------------------------------------------------------------------------------------------------------------------------------------------------------------------------------------------------------------------------------------------------------------------------------------------------------------------------|
| C238 | Cannabisin-D   | 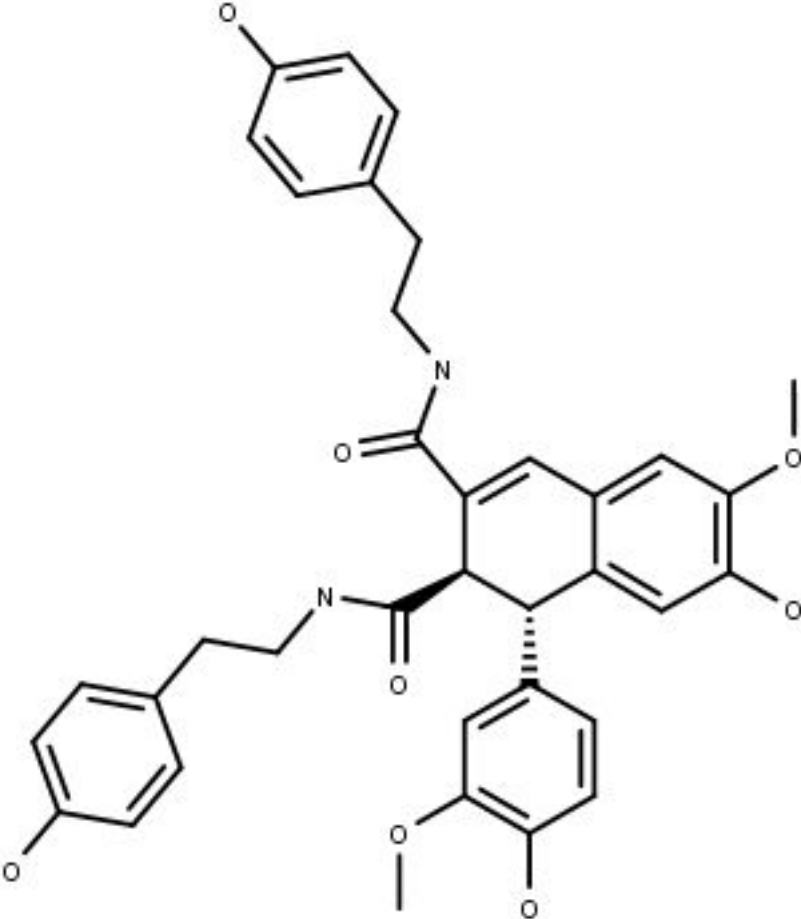 <p>The chemical structure of Cannabisin-D is a complex polycyclic molecule. It features a central bicyclic core consisting of a six-membered ring fused to a seven-membered ring. The six-membered ring has a carbonyl group (C=O) and a nitrogen atom (N) attached to it. The nitrogen atom is further substituted with a propyl chain that ends in a para-substituted phenoxy group. The seven-membered ring has a carbonyl group (C=O) and a nitrogen atom (N) attached to it. The nitrogen atom is further substituted with a propyl chain that ends in a para-substituted phenoxy group. The seven-membered ring also has a methoxy group (OCH<sub>3</sub>) and a hydroxyl group (OH) attached to it. Additionally, there is a side chain on the seven-membered ring consisting of a methylene group (CH<sub>2</sub>) attached to a carbon atom that is part of a five-membered ring. This five-membered ring has two methoxy groups (OCH<sub>3</sub>) and a hydroxyl group (OH) attached to it.</p> |
| C239 | Cannabispirone |  <p>The chemical structure of Cannabispirone is a bicyclic molecule. It consists of a six-membered ring fused to a five-membered ring. The six-membered ring has a carbonyl group (C=O) and a methoxy group (OCH<sub>3</sub>) attached to it. The five-membered ring has a carbonyl group (C=O) and a methoxy group (OCH<sub>3</sub>) attached to it.</p>                                                                                                                                                                                                                                                                                                                                                                                                                                                                                                                                                                                                                                                  |

|      |                           |                                                                                                                                                                                                                                                                                                                                                                                                                                                 |
|------|---------------------------|-------------------------------------------------------------------------------------------------------------------------------------------------------------------------------------------------------------------------------------------------------------------------------------------------------------------------------------------------------------------------------------------------------------------------------------------------|
| C240 | Cannabitrinol (CBT)       | <p>The chemical structure of Cannabitrinol (CBT) is a tricyclic cannabinoid. It features a central pyrene-like core with a lactone ring fused to one of the rings. The structure is substituted with a methyl group and a methyl ester group on the left ring, a methyl group and a methyl ester group on the right ring, and a propyl chain on the central ring. The propyl chain is attached to the central ring at the 1-position.</p>       |
| C241 | Cannabitrinolvarin (CBTV) | <p>The chemical structure of Cannabitrinolvarin (CBTV) is a tricyclic cannabinoid. It features a central pyrene-like core with a lactone ring fused to one of the rings. The structure is substituted with a methyl group and a methyl ester group on the left ring, a methyl group and a methyl ester group on the right ring, and a propyl chain on the central ring. The propyl chain is attached to the central ring at the 1-position.</p> |
| C242 | Cannabivarin (CBV)        | <p>The chemical structure of Cannabivarin (CBV) is a tricyclic cannabinoid. It features a central pyrene-like core with a lactone ring fused to one of the rings. The structure is substituted with a methyl group and a methyl ester group on the left ring, a methyl group and a methyl ester group on the right ring, and a propyl chain on the central ring. The propyl chain is attached to the central ring at the 1-position.</p>        |

|      |              |                                                                                                                                                                                                                                                                                                                                                                                                                                                                   |
|------|--------------|-------------------------------------------------------------------------------------------------------------------------------------------------------------------------------------------------------------------------------------------------------------------------------------------------------------------------------------------------------------------------------------------------------------------------------------------------------------------|
| C243 | Cannflavin A | 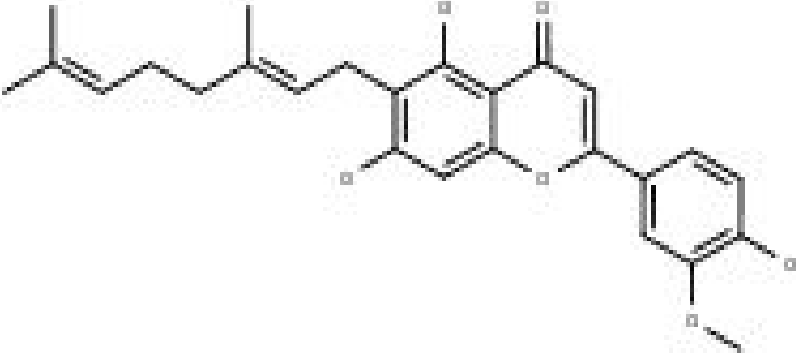 <p>The structure of Cannflavin A consists of a central chromone ring system. The 6-position of the chromone is substituted with a 3,4,5-trimethoxyphenyl group. The 8-position is substituted with a side chain consisting of a propyl chain followed by a trans-double bond, another propyl chain, and a second trans-double bond, which is terminated by a methyl group.</p> |
| C244 | Cannflavin B |  <p>The structure of Cannflavin B is similar to Cannflavin A, featuring a chromone core with a 3,4,5-trimethoxyphenyl group at the 6-position. However, the side chain at the 8-position is shorter, consisting of a propyl chain followed by a trans-double bond and a methyl group.</p>                                                                                      |
| C245 | Cannflavin C |  <p>The structure of Cannflavin C features a chromone core with a 3,4,5-trimethoxyphenyl group at the 6-position. The side chain at the 8-position is the longest of the three, consisting of a propyl chain followed by a trans-double bond, another propyl chain, a second trans-double bond, and a final propyl chain terminated with a methyl group.</p>                  |

|      |            |                                                                                     |
|------|------------|-------------------------------------------------------------------------------------|
| C246 | Carbofuran | 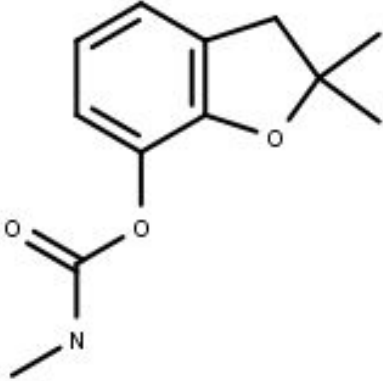  |
| C247 | Carmagerol |  |

|      |                |                                                                                     |
|------|----------------|-------------------------------------------------------------------------------------|
| C248 | Carvacrol      | 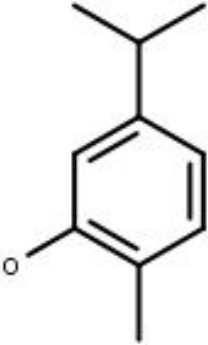   |
| C249 | Carvone        |    |
| C250 | CBDA-THC ester |  |



|      |                                  |                                                                                      |
|------|----------------------------------|--------------------------------------------------------------------------------------|
| C251 | Cedryl acetate                   | 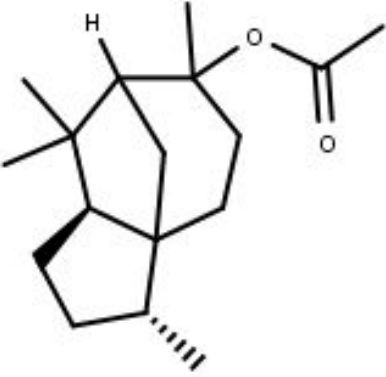   |
| C252 | Cetyl Alcohol                    |    |
| C253 | Chiricanine B                    |   |
| C254 | Chlorocannabiorcicchromenic acid |  |

|      |                    |                                                                                                                                                                                                                                                                                                                                                                                                                  |
|------|--------------------|------------------------------------------------------------------------------------------------------------------------------------------------------------------------------------------------------------------------------------------------------------------------------------------------------------------------------------------------------------------------------------------------------------------|
| C255 | Chrysoeriol        | 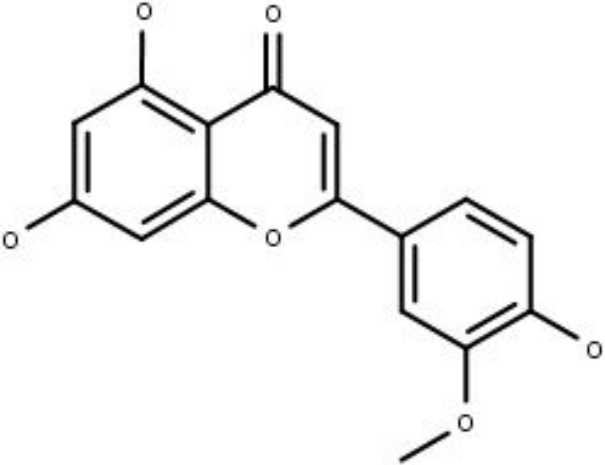 <p>The structure of Chrysoeriol is a flavonol. It consists of a flavan-3-ol core (a benzopyrone ring system) with a 3,4,5-trimethoxyphenyl group attached to the C-3 position. The three methoxy groups are located at the 3, 4, and 5 positions of the phenyl ring.</p>                                                      |
| C256 | cis-2-Pinanol      |  <p>The structure of cis-2-Pinanol is a bicyclic monoterpene alcohol. It features a pinane skeleton with a hydroxyl group (-OH) and a methyl group (-CH<sub>3</sub>) attached to the C-2 position in a cis configuration. The hydroxyl group is shown with a wedge bond, and the methyl group is shown with a dashed bond.</p> |
| C257 | cis-Beta-Farnesene |  <p>The structure of cis-Beta-Farnesene is a sesquiterpene hydrocarbon. It is a long-chain molecule with two double bonds in a cis configuration. The first double bond is at the 3-position, and the second double bond is at the 11-position. The chain is branched with methyl groups at the 2, 6, and 10 positions.</p>  |

|      |                      |                                                                                      |
|------|----------------------|--------------------------------------------------------------------------------------|
| C258 | cis-Gamma-Bisabolene | 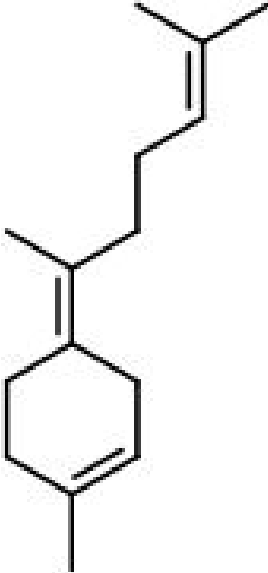    |
| C259 | cis-Ocimene          |    |
| C260 | cis-Sabinene Hydrate |   |
| C261 | Citronellyl acetate  |  |
| C262 | Citronellolformate   |  |

|      |            |                                                                                      |
|------|------------|--------------------------------------------------------------------------------------|
| C263 | Compound-2 | 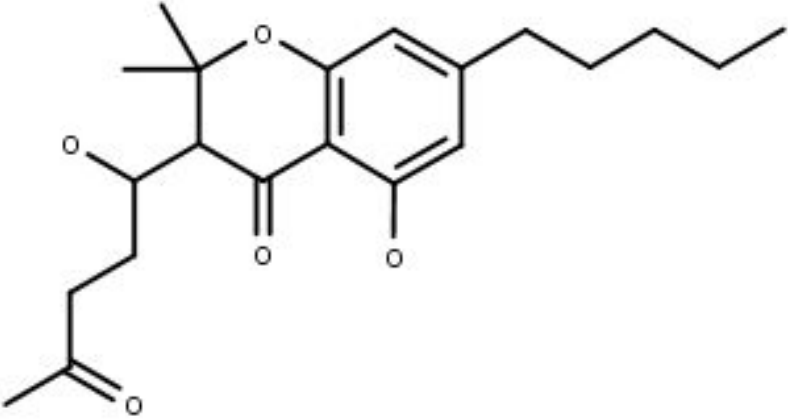   |
| C264 | Compound-3 |   |
| C265 | compound-4 |  |

|      |                     |                                                                                      |
|------|---------------------|--------------------------------------------------------------------------------------|
| C266 | Confluentin         | 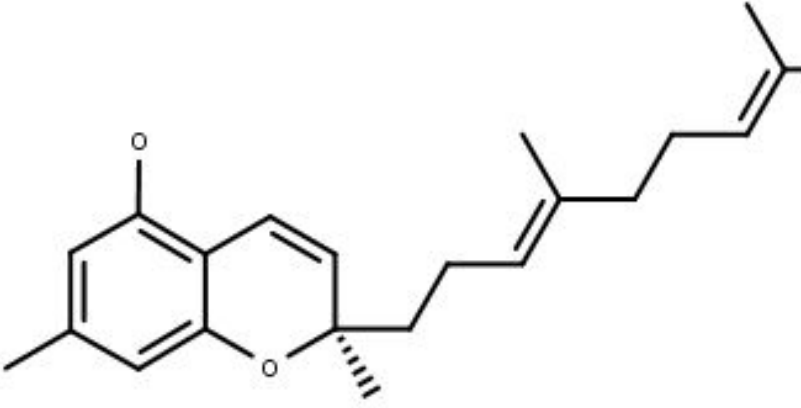   |
| C267 | Cumene              |     |
| C268 | Cuminaldehyde       |    |
| C269 | Daurichromenic acid |  |

|      |                                                 |                                                                                    |
|------|-------------------------------------------------|------------------------------------------------------------------------------------|
| C270 | Delta-9-tetrahydrocannabiorcolic acid (THCA-C1) | 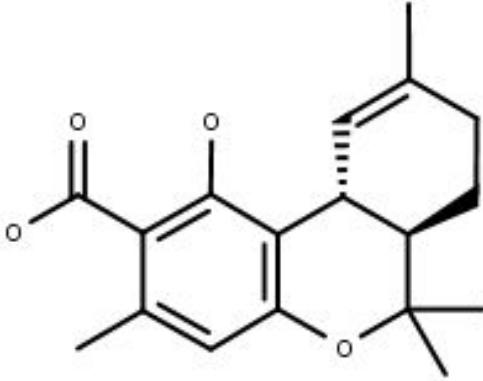 |
| C271 | Decanal                                         |  |
| C272 | Decarboxyamorfrutin A                           |  |

|      |                            |                                                                                                                                                                                                                                                                                                                                                                                                                                                                      |
|------|----------------------------|----------------------------------------------------------------------------------------------------------------------------------------------------------------------------------------------------------------------------------------------------------------------------------------------------------------------------------------------------------------------------------------------------------------------------------------------------------------------|
| C273 | Decarboxyamorfrutin B      | 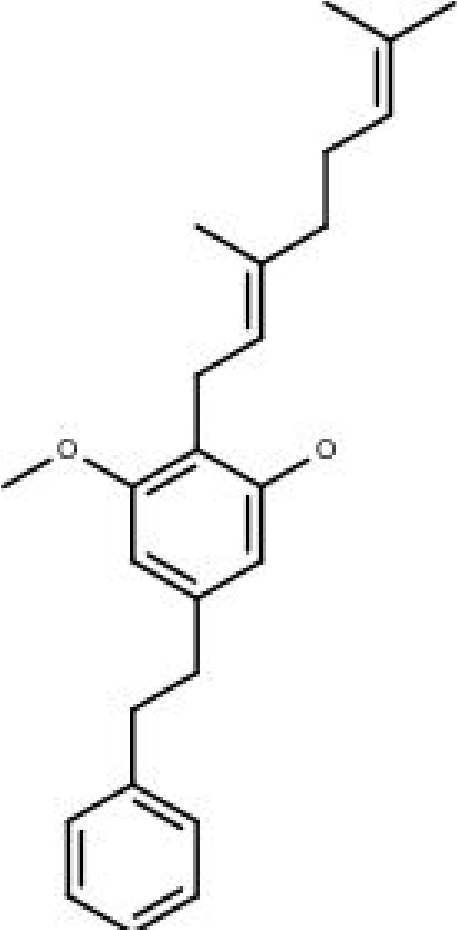 <p>The structure shows a central benzene ring with two methoxy groups (-OCH<sub>3</sub>) at the 2 and 6 positions. A propyl chain is attached at the 1 position, which is further connected to another propyl chain. This second propyl chain is substituted with a methyl group at the 2-position and a 3-methylbut-2-enyl group at the 3-position.</p>                         |
| C274 | Dehydrocannabifuran (DCBF) |  <p>The structure is a bicyclic system consisting of two benzene rings fused to a central furan ring. The furan ring has an oxygen atom at the top position. The left benzene ring has a propyl group at the 2-position and a methoxy group at the 5-position. The right benzene ring has a methyl group at the 2-position and a 3-methylbut-2-enyl group at the 5-position.</p> |
| C275 | Delta-3-Carene             |  <p>The structure is a bicyclic system consisting of a cyclohexane ring fused to a cyclopropane ring. The cyclohexane ring has a double bond between the two carbons that are not part of the fused cyclopropane ring. The cyclopropane ring has a methyl group on one of its carbons and a gem-dimethyl group on the other carbon.</p>                                           |

|      |                                                |                                                                                                                                                                                                                                                                                                                                                                                            |
|------|------------------------------------------------|--------------------------------------------------------------------------------------------------------------------------------------------------------------------------------------------------------------------------------------------------------------------------------------------------------------------------------------------------------------------------------------------|
| C276 | Delta-7-cis-Isotetrahydrocannabivarin          | 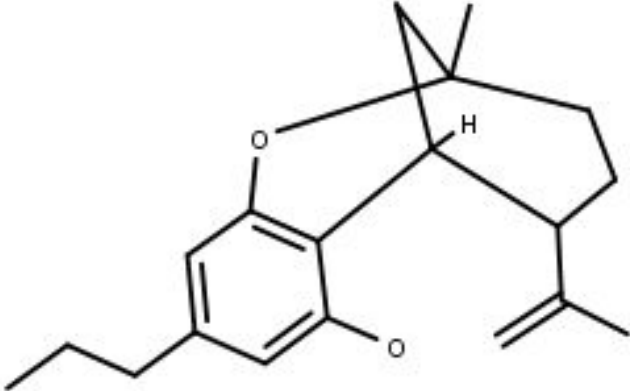 <p>The structure shows a bicyclic cannabinoid core. The benzene ring is substituted with a propyl group at the 5-position and a methoxy group at the 3-position. The side chain at the 1-position is in the cis configuration, with the hydrogen atom explicitly shown pointing up.</p>                 |
| C277 | Delta-7-trans-Isotetrahydrocannabinol          |  <p>The structure is similar to C276, but the side chain at the 1-position is in the trans configuration, with the hydrogen atom explicitly shown pointing down.</p>                                                                                                                                    |
| C278 | Delta-8-tetrahydrocannabinol ( $\Delta$ 8-THC) |  <p>The structure shows a bicyclic cannabinoid core. The benzene ring is substituted with a pentyl group at the 5-position and a methoxy group at the 3-position. The side chain at the 1-position is in the delta-8 configuration, with a methyl group at the 6-position of the cyclohexene ring.</p> |



|      |                                                         |                                                                                     |
|------|---------------------------------------------------------|-------------------------------------------------------------------------------------|
| C279 | Delta-8-tetrahydrocannabinolic acid ( $\Delta^8$ -THCA) | 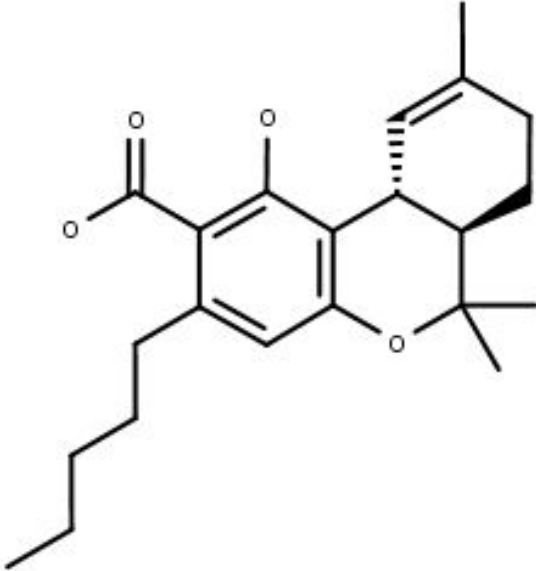  |
| C280 | Delta-9-cis-tetrahydrocannabivarin                      |  |

|      |                                         |                                                                                                                                                                                                                                                                                                                                                                                                                                                                                                                                                                                        |
|------|-----------------------------------------|----------------------------------------------------------------------------------------------------------------------------------------------------------------------------------------------------------------------------------------------------------------------------------------------------------------------------------------------------------------------------------------------------------------------------------------------------------------------------------------------------------------------------------------------------------------------------------------|
| C281 | Delta-9-nor-tetrahydrocannabinolic acid | 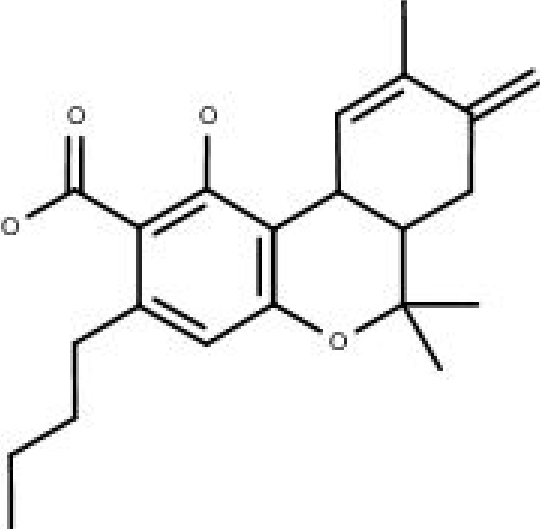 <p>The structure shows a central benzene ring with a propyl group at the 1-position, a hydroxyl group at the 3-position, and a carboxylic acid group at the 4-position. This benzene ring is connected to a pyran ring at the 2-position. The pyran ring has a methyl group at the 3-position, a methyl group at the 4-position, and a methyl group at the 5-position. A double bond is located between the 6 and 7 positions of the pyran ring, with a vinyl group attached to the 7-position.</p> |
| C282 | Delta-9-nor-tetrahydrocannabinol        |  <p>The structure is identical to the one in row C281, but the carboxylic acid group at the 4-position of the benzene ring is replaced by a hydroxyl group.</p>                                                                                                                                                                                                                                                                                                                                     |
| C283 | Delta-9-Tetrahydrocannabinol-C4         |  <p>The structure is identical to the one in row C282, but the double bond between the 6 and 7 positions of the pyran ring is in the delta configuration, indicated by a dashed bond between the 6 and 7 positions and a solid wedge bond between the 5 and 6 positions.</p>                                                                                                                                                                                                                       |

|      |                                                |                                                                                      |
|------|------------------------------------------------|--------------------------------------------------------------------------------------|
| C284 | Delta-9-tetrahydrocannabinol (THC-C1)          | 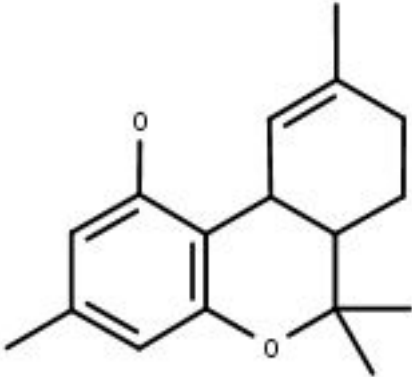   |
| C285 | Delta-9-tetrahydrocannabinolic acid A (THCA-A) |   |
| C286 | Delta-9-tetrahydrocannabinolic acid B (THCA-B) |  |

|      |                                                  |                                                                                      |
|------|--------------------------------------------------|--------------------------------------------------------------------------------------|
| C287 | Delta-9-tetrahydrocannabinolic acid-C4 (THCA-C4) | 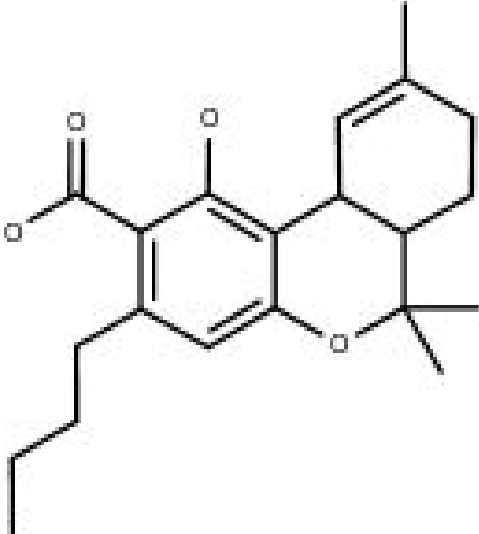   |
| C288 | Delta-Cadinene                                   |    |
| C289 | Demethylamorfrutin A                             |  |

|      |                                      |                                                                                                                                                                                                                                                                                                                                                                                                                                                                                                                                                                                                  |
|------|--------------------------------------|--------------------------------------------------------------------------------------------------------------------------------------------------------------------------------------------------------------------------------------------------------------------------------------------------------------------------------------------------------------------------------------------------------------------------------------------------------------------------------------------------------------------------------------------------------------------------------------------------|
| C290 | Demethyldecarboxyamorfrutin A        | 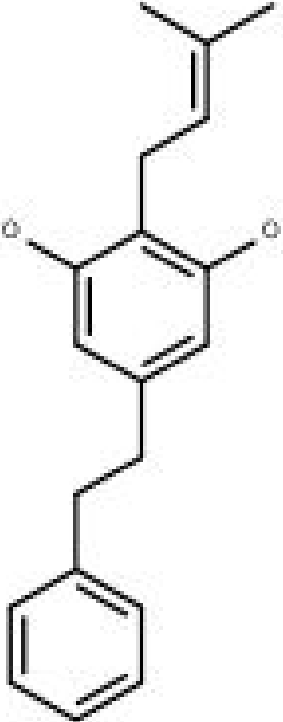 <p>The structure shows a central benzene ring with two methoxy groups (-OCH<sub>3</sub>) at the 2 and 6 positions. A propyl chain is attached at the 1 position, which is further connected to another propyl chain. This second propyl chain is attached to a terminal isopentenylidene group (-CH=C(CH<sub>3</sub>)<sub>2</sub>).</p>                                                                                                                                                                        |
| C291 | Deprenyl O-methylcannibigerolic acid |  <p>The structure features a central benzene ring with a methyl ester group (-COOCH<sub>3</sub>) at the 1 position, a methoxy group (-OCH<sub>3</sub>) at the 3 position, and a propyl chain at the 4 position. A propyl chain is also attached at the 5 position, which is connected to a terminal isopentenylidene group (-CH=C(CH<sub>3</sub>)<sub>2</sub>).</p>                                                                                                                                           |
| C292 | Desmodianone A                       |  <p>The structure is a complex polycyclic molecule. It consists of a central benzene ring with a chlorine atom at the 1 position and a methyl group at the 2 position. This benzene ring is fused to a six-membered ring containing an oxygen atom and a carbonyl group. This system is further connected to another benzene ring with a chlorine atom at the 1 position and a propyl chain at the 2 position. This second benzene ring is fused to another six-membered ring containing an oxygen atom.</p> |

|      |                |                                                                                                                                                                                                                                                                                                                                                                      |
|------|----------------|----------------------------------------------------------------------------------------------------------------------------------------------------------------------------------------------------------------------------------------------------------------------------------------------------------------------------------------------------------------------|
| C293 | Desmodianone C | 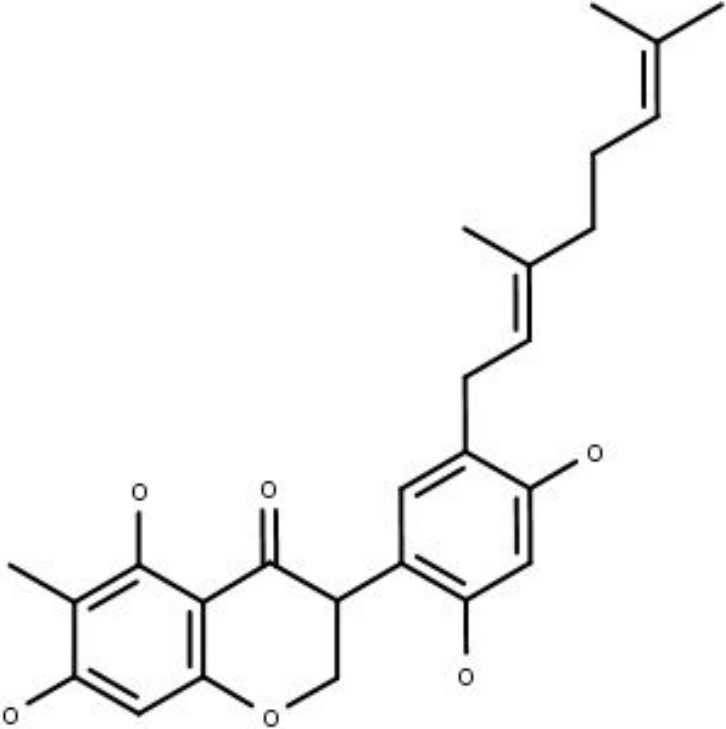 <p>The structure of Desmodianone C features a central piperidine ring. At the 2-position, there is a 3,4,5-trimethoxyphenyl group. At the 4-position, there is a 3,4,5-trimethoxyphenyl group. At the 6-position, there is a 2-(3,4,5-trimethoxyphenyl)but-3-en-2-yl group.</p>   |
| C294 | Desmodianone D |  <p>The structure of Desmodianone D features a central piperidine ring. At the 2-position, there is a 3,4,5-trimethoxyphenyl group. At the 4-position, there is a 3,4,5-trimethoxyphenyl group. At the 6-position, there is a 2-(3,4,5-trimethoxyphenyl)but-3-en-2-yl group.</p>  |
| C295 | Desmodianone E |  <p>The structure of Desmodianone E features a central piperidine ring. At the 2-position, there is a 3,4,5-trimethoxyphenyl group. At the 4-position, there is a 3,4,5-trimethoxyphenyl group. At the 6-position, there is a 2-(3,4,5-trimethoxyphenyl)but-3-en-2-yl group.</p> |

|      |                               |                                                                                     |
|------|-------------------------------|-------------------------------------------------------------------------------------|
| C296 | Diacetone alcohol             | 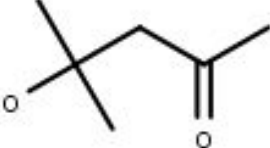   |
| C297 | Dibutyl phthalate             |   |
| C298 | Diethyl Phthalate             |  |
| C299 | Dimethylbenzylcarbiny acetate |  |

|      |                     |                                                                                     |
|------|---------------------|-------------------------------------------------------------------------------------|
| C300 | Dimethylsulfone     | 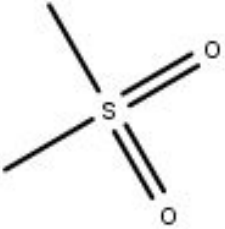   |
| C301 | Dimethylsulfide     |    |
| C302 | Dodecane            |   |
| C303 | Dothiepin Sulfoxide |  |
| C304 | Durene              |  |



|      |                                            |                                                                                                                                                                                                                                                                                                                                                                                                                                                                                                                                                                                                                                                                                                                                                                           |
|------|--------------------------------------------|---------------------------------------------------------------------------------------------------------------------------------------------------------------------------------------------------------------------------------------------------------------------------------------------------------------------------------------------------------------------------------------------------------------------------------------------------------------------------------------------------------------------------------------------------------------------------------------------------------------------------------------------------------------------------------------------------------------------------------------------------------------------------|
| C305 | Dyclocaine                                 | 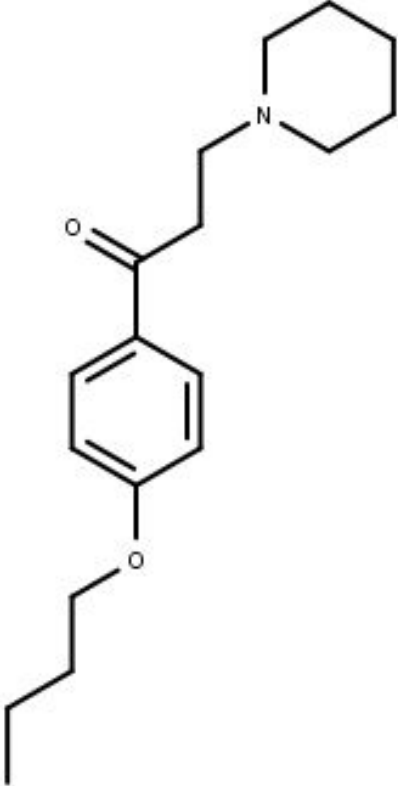 <p>The chemical structure of Dyclocaine consists of a central benzene ring. At the para position (bottom), there is a propyl ether group (-O-CH2-CH2-CH3). At the other para position (top), there is a propyl ester group (-C(=O)-CH2-CH2-N), where the nitrogen atom is part of a piperidine ring.</p>                                                                                                                                                                                                                                                                                                                                                                               |
| C306 | epi-Bornyl Delta-9-tetrahydrocannabinolate |  <p>The chemical structure of epi-Bornyl Delta-9-tetrahydrocannabinolate (eB-THC) is a complex polycyclic molecule. It features a bicyclic bornane core (left) with a hydrogen atom explicitly shown at the 10-position. This core is linked via an ester bond to a central benzene ring. The benzene ring has a propyl group at the 9-position and a methyl group at the 11-position. The benzene ring is further substituted with a methyl group at the 2-position and a methyl ether group (-O-CH3) at the 3-position. The 4-position of the benzene ring is connected to a cyclohexene ring, which has a methyl group at the 1-position and a methyl group at the 6-position.</p> |

|      |                 |                                                                                     |
|------|-----------------|-------------------------------------------------------------------------------------|
| C307 | Estragole       | 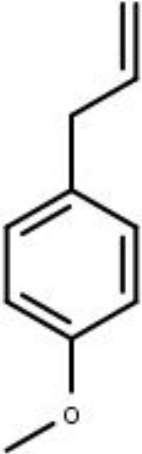   |
| C308 | Ethylacetate    |    |
| C309 | Ethylenediamine |    |
| C310 | Ethylene oxide  |  |
| C311 | Ethylenimine    |  |

|      |                          |                                                                                                                                                                                                                                                                                                                                                                                                                                                                                                |
|------|--------------------------|------------------------------------------------------------------------------------------------------------------------------------------------------------------------------------------------------------------------------------------------------------------------------------------------------------------------------------------------------------------------------------------------------------------------------------------------------------------------------------------------|
| C312 | Eudesmyl-Cannabigerolate | 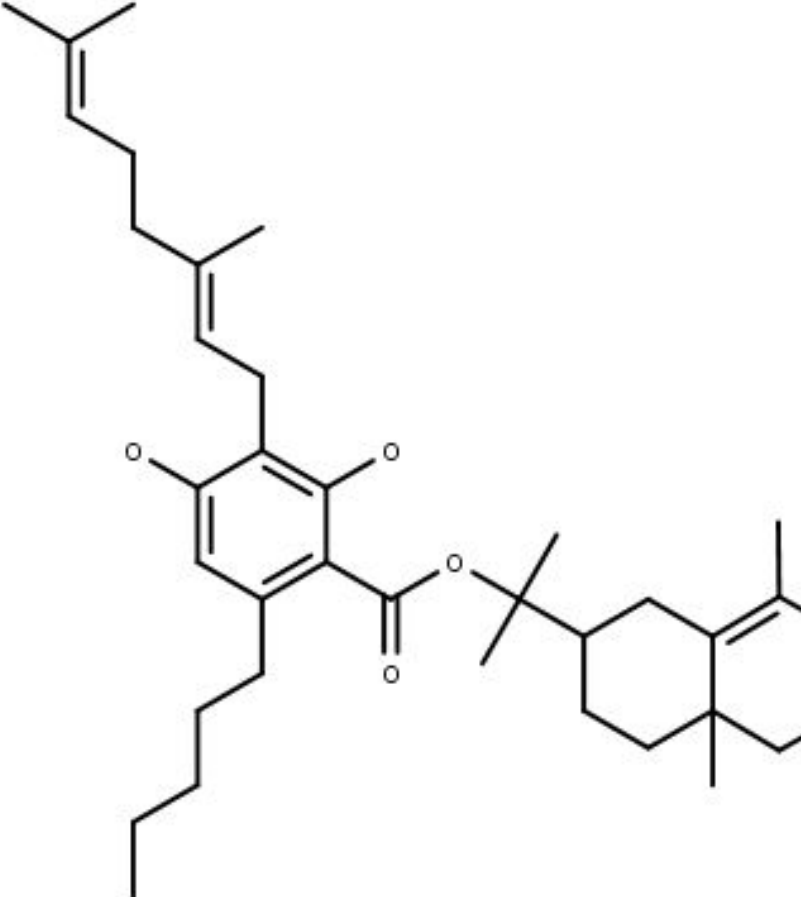 <p>The structure shows a central benzene ring with two methoxy groups (-OCH<sub>3</sub>) at the 1 and 3 positions. It is substituted with a pentyl chain at the 4 position, a propyl chain at the 5 position, and a long side chain at the 2 position. The side chain consists of a propyl chain attached to a double bond, which is further substituted with a methyl group and another propyl chain.</p> |
| C313 | Eugenol                  |  <p>The structure shows a benzene ring with a methoxy group (-OCH<sub>3</sub>) at the 1 position, a hydroxyl group (-OH) at the 3 position, and an allyl group (-CH<sub>2</sub>-CH=CH<sub>2</sub>) at the 4 position.</p>                                                                                                                                                                                   |

|      |                 |                                                                                                                                                                                                                                                                                                                                                                                 |
|------|-----------------|---------------------------------------------------------------------------------------------------------------------------------------------------------------------------------------------------------------------------------------------------------------------------------------------------------------------------------------------------------------------------------|
| C314 | Eugenyl acetate | 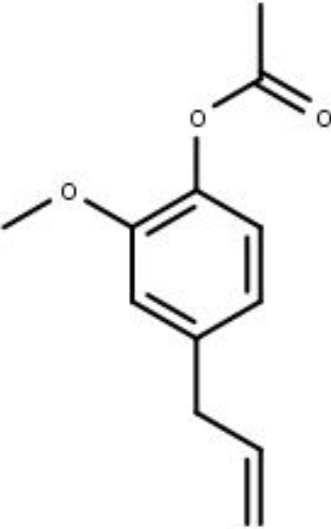 <p>The chemical structure of Eugenyl acetate consists of a benzene ring with three substituents: a methoxy group (-OCH<sub>3</sub>) at the 3-position, an acetate group (-OOCCH<sub>3</sub>) at the 1-position, and an allyl group (-CH<sub>2</sub>-CH=CH<sub>2</sub>) at the 4-position.</p> |
| C315 | Fenchone        |  <p>The chemical structure of Fenchone is a bicyclic monoterpene ketone. It features a decalin core with a ketone group (=O) at the 1-position and a methyl group at the 2-position. A hydrogen atom is explicitly shown at the 5-position.</p>                                               |
| C316 | Fenchyl Alcohol |  <p>The chemical structure of Fenchyl Alcohol is a bicyclic monoterpene alcohol. It features a decalin core with a hydroxyl group (-OH) at the 1-position and a methyl group at the 2-position. A hydrogen atom is explicitly shown at the 5-position.</p>                                   |

|      |               |                                                                                                                                                                                                                                                                                                                                                                                                                                                                                                                                                                                                                                                    |
|------|---------------|----------------------------------------------------------------------------------------------------------------------------------------------------------------------------------------------------------------------------------------------------------------------------------------------------------------------------------------------------------------------------------------------------------------------------------------------------------------------------------------------------------------------------------------------------------------------------------------------------------------------------------------------------|
| C317 | Ferruginene A | 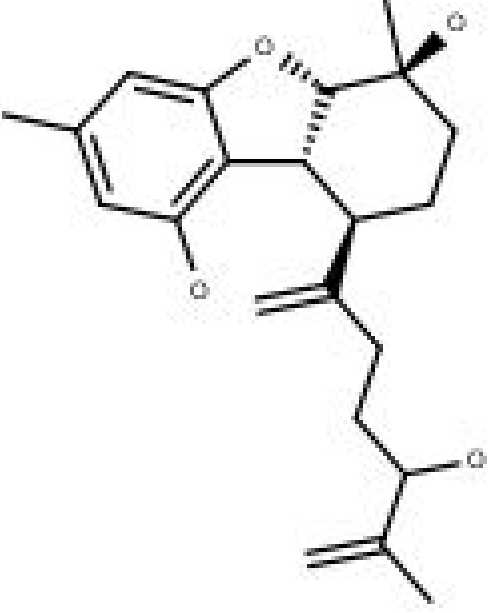 <p>The chemical structure of Ferruginene A is a complex polycyclic molecule. It features a central bicyclic core consisting of a six-membered ring fused to a seven-membered ring. Attached to the six-membered ring is a benzene ring with a methyl group at the para position and an oxygen atom at the ortho position. The seven-membered ring has a methyl group and a hydroxyl group, both shown with wedged bonds. A side chain is attached to the seven-membered ring, containing a double bond, a hydroxyl group, and a terminal isopropenyl group.</p> |
| C318 | Ferruginene B |  <p>The chemical structure of Ferruginene B is very similar to Ferruginene A, but with a key difference in the side chain. The side chain contains a double bond and a hydroxyl group, but the terminal group is a tert-butyl group instead of an isopropenyl group.</p>                                                                                                                                                                                                                                                                                        |

|      |               |                                                                                                                                                                                                                                                                                                                                                                                                                                                                                                                                                                                                                               |
|------|---------------|-------------------------------------------------------------------------------------------------------------------------------------------------------------------------------------------------------------------------------------------------------------------------------------------------------------------------------------------------------------------------------------------------------------------------------------------------------------------------------------------------------------------------------------------------------------------------------------------------------------------------------|
| C319 | Ferruginene C | 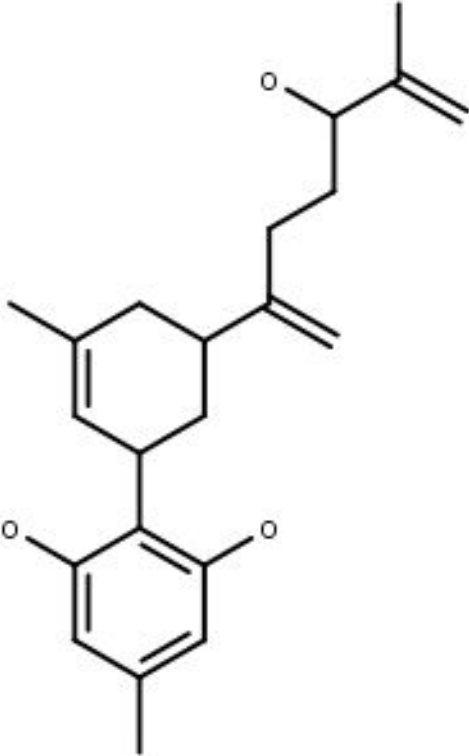 <p>The structure of Ferruginene C consists of a central benzene ring substituted with two methoxy groups (-OCH<sub>3</sub>) at the 3 and 5 positions and a methyl group (-CH<sub>3</sub>) at the 1 position. This benzene ring is attached to a cyclohexene ring at the 1 position. The cyclohexene ring has a methyl group (-CH<sub>3</sub>) at the 4 position and a side chain at the 2 position. The side chain is a 3-methylbut-3-en-1-yl group, represented as -CH<sub>2</sub>-CH<sub>2</sub>-CH(CH<sub>3</sub>)-CH<sub>2</sub>-.</p> |
| C320 | Formic acid   |  <p>The structure of Formic acid is a simple carboxylic acid, represented as H-C(=O)-OH.</p>                                                                                                                                                                                                                                                                                                                                                                                                                                               |
| C321 | Furfural      |  <p>The structure of Furfural is a furan ring substituted with an aldehyde group (-CHO) at the 2 position.</p>                                                                                                                                                                                                                                                                                                                                                                                                                             |

|      |                           |                                                                                      |
|------|---------------------------|--------------------------------------------------------------------------------------|
| C322 | Furfurylmethylamphetamine | 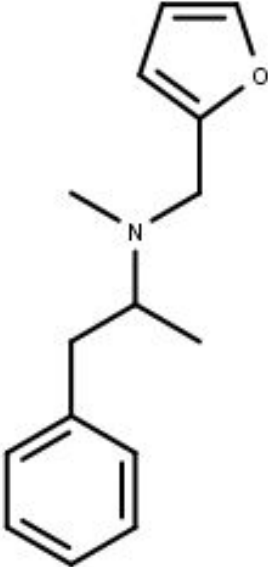    |
| C323 | Gamma-curcumene           |    |
| C324 | Gamma-eudesmol            |  |

|      |                   |                                                                                     |
|------|-------------------|-------------------------------------------------------------------------------------|
| C325 | Gamma-Gurjunene   | 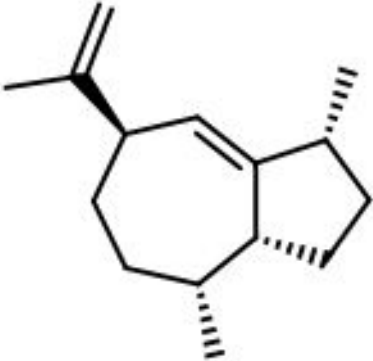   |
| C326 | Gamma-Hexalactone |    |
| C327 | Gamma-Murolene    |   |
| C328 | Gamma-Terpinene   |  |



|      |              |                                                                                                                                                                                                                                                                                                                                                                                                                                                                                  |
|------|--------------|----------------------------------------------------------------------------------------------------------------------------------------------------------------------------------------------------------------------------------------------------------------------------------------------------------------------------------------------------------------------------------------------------------------------------------------------------------------------------------|
| C329 | Glepidotin C | 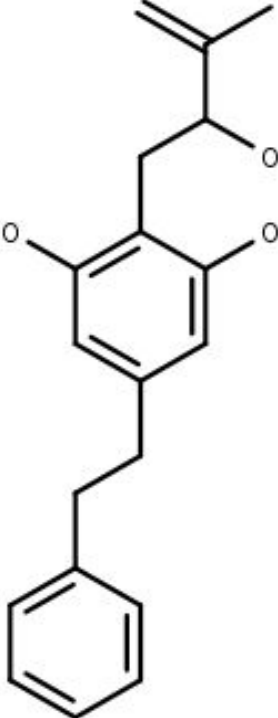 <p>The chemical structure of Glepidotin C consists of a central benzene ring. At the 1-position, there is a propyl chain that terminates in a phenyl ring. At the 2-position, there is a propyl chain that terminates in a 2-methylprop-1-en-2-yl group. At the 3 and 5 positions, there are two oxygen atoms, each with a single bond extending outwards, representing a dihydroxy group.</p> |
| C330 | Globulol     |  <p>The chemical structure of Globulol is a complex polycyclic molecule. It features a central seven-membered ring fused to a five-membered ring on one side and a six-membered ring on the other. The structure is highly substituted with several methyl groups and a carbonyl group (C=O) attached to the seven-membered ring.</p>                                                          |

|      |                   |                                                                                      |
|------|-------------------|--------------------------------------------------------------------------------------|
| C331 | Grossamide        | 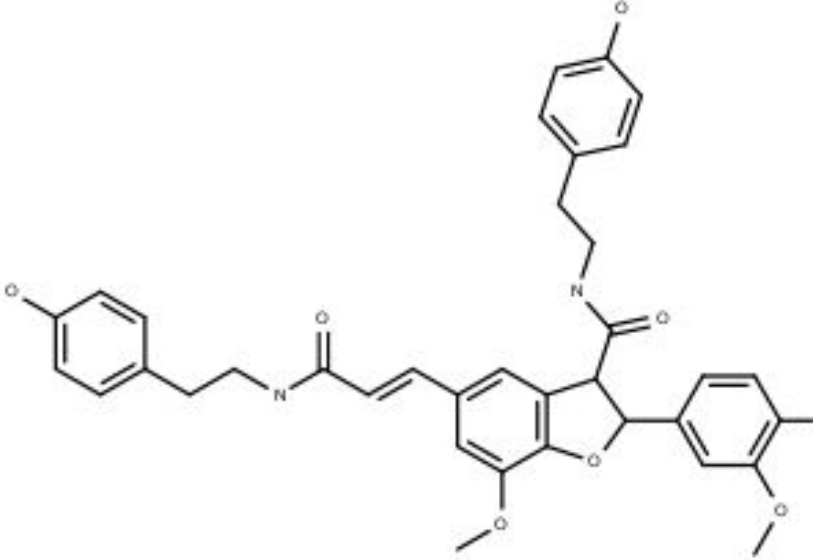   |
| C332 | Guajol            |    |
| C333 | Heli-Cannabigenol |   |
| C334 | Heptanal          |  |
| C335 | Hexadecane        |  |

|      |                             |                                                                                                                                                                                                                                                                                                                                                                                               |
|------|-----------------------------|-----------------------------------------------------------------------------------------------------------------------------------------------------------------------------------------------------------------------------------------------------------------------------------------------------------------------------------------------------------------------------------------------|
| C336 | Hexahydrocannabinol         | 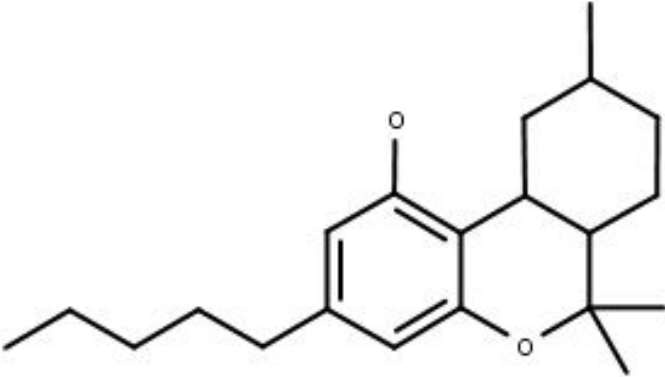 <p>The structure shows a central benzene ring with a propyl group at the 1-position, a carbonyl group at the 2-position, and a tetrahydropyran ring at the 3-position. The tetrahydropyran ring has a methyl group at the 4-position and a quaternary carbon at the 5-position with two methyl groups.</p> |
| C337 | Hexanal                     |  <p>The structure shows a six-carbon chain with an aldehyde group at the end.</p>                                                                                                                                                                                                                           |
| C338 | Hexanoic acid, methyl ester |  <p>The structure shows a six-carbon chain with a methyl ester group at the end.</p>                                                                                                                                                                                                                        |
| C339 | Hexanoic acid, propyl ester |  <p>The structure shows a six-carbon chain with a propyl ester group at the end.</p>                                                                                                                                                                                                                       |
| C340 | Hexestrol                   |  <p>The structure shows a central carbon atom bonded to two ethyl groups, a propyl group, and two 4-hydroxyphenyl groups.</p>                                                                                                                                                                              |

|      |                           |                                                                                                                                                                                                                                                                                                                                                                                                                                                                                                                                                                                                                                                 |
|------|---------------------------|-------------------------------------------------------------------------------------------------------------------------------------------------------------------------------------------------------------------------------------------------------------------------------------------------------------------------------------------------------------------------------------------------------------------------------------------------------------------------------------------------------------------------------------------------------------------------------------------------------------------------------------------------|
| C341 | Hordenine                 | 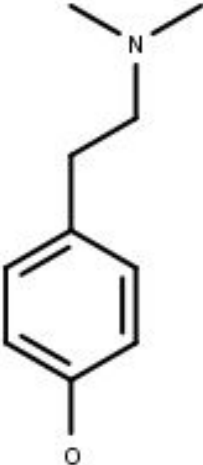 <p>The chemical structure of Hordenine consists of a central benzene ring with a methoxy group (-OCH<sub>3</sub>) at the para position. A propyl chain is attached to the ring, ending in a dimethylamino group (-N(CH<sub>3</sub>)<sub>2</sub>).</p>                                                                                                                                                                                                                                                                                                         |
| C342 | Hydroxy Heli-Cannabigerol |  <p>The chemical structure of Hydroxy Heli-Cannabigerol is a complex molecule. It features a central benzene ring with two hydroxyl groups (-OH) at the meta positions. A propyl chain is attached to the ring, leading to a second benzene ring with a methoxy group (-OCH<sub>3</sub>) at the para position. This second benzene ring is further substituted with a propyl chain that leads to a trans-alkene. The alkene is substituted with a methyl group and a pentyl chain that ends in an isopropenyl group (-C(CH<sub>3</sub>)=CH<sub>2</sub>).</p> |

|      |                            |                                                                                      |
|------|----------------------------|--------------------------------------------------------------------------------------|
| C343 | Ipsdienol                  | 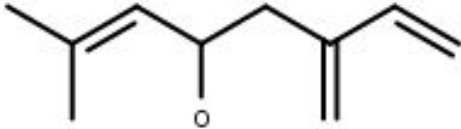   |
| C344 | Isoamyl alcohol            |     |
| C345 | Isobornyl acetate          |    |
| C346 | Isobornyl thiocyanoacetate |  |
| C347 | Isobutane                  |   |

|      |                   |                                                                                     |
|------|-------------------|-------------------------------------------------------------------------------------|
| C348 | Isobutyraldehyde  | 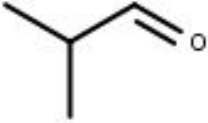   |
| C349 | Isobutyrophenone  |    |
| C350 | Isocannabitrol    |  |
| C351 | Isocyanatomethane |  |
| C352 | Isodurene         |  |

|      |              |                                                                                      |
|------|--------------|--------------------------------------------------------------------------------------|
| C353 | Isoeugenol   | 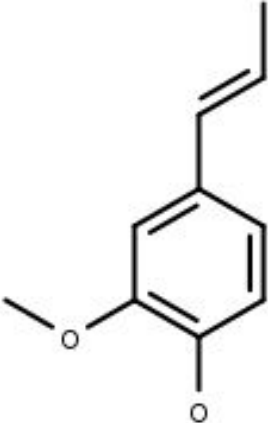    |
| C354 | Isolimonene  |    |
| C355 | Isoprene     |   |
| C356 | Isoquinoline |   |
| C357 | Kaempferol   |  |

|      |                 |                                                                                      |
|------|-----------------|--------------------------------------------------------------------------------------|
| C358 | Limonene oxide  | 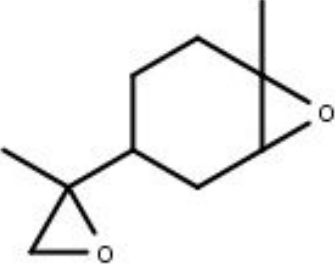    |
| C359 | Limonene        |     |
| C360 | Linalool        |   |
| C361 | Linalyl acetate |  |



|      |               |                                                                                      |
|------|---------------|--------------------------------------------------------------------------------------|
| C362 | Linoleic acid | 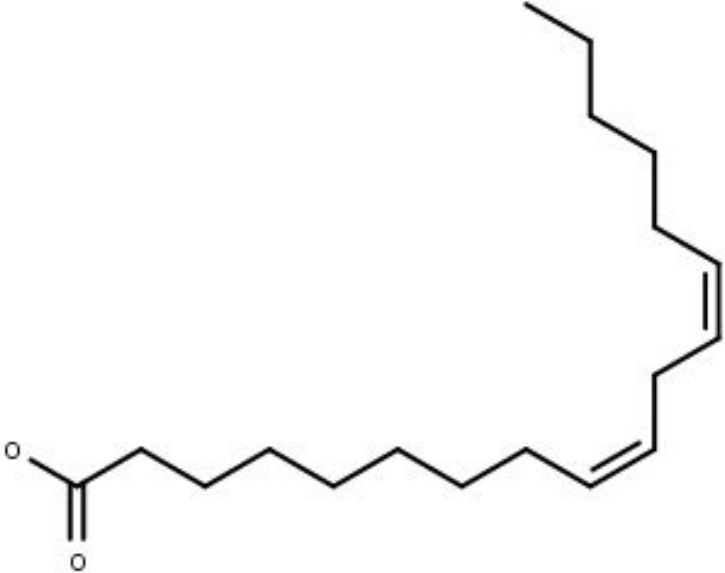   |
| C363 | Longifolene   |    |
| C364 | Luteolin      |  |

|      |                |                                                                                                                                                                                                                                                                                                                                                            |
|------|----------------|------------------------------------------------------------------------------------------------------------------------------------------------------------------------------------------------------------------------------------------------------------------------------------------------------------------------------------------------------------|
| C365 | Machaeridiol A | 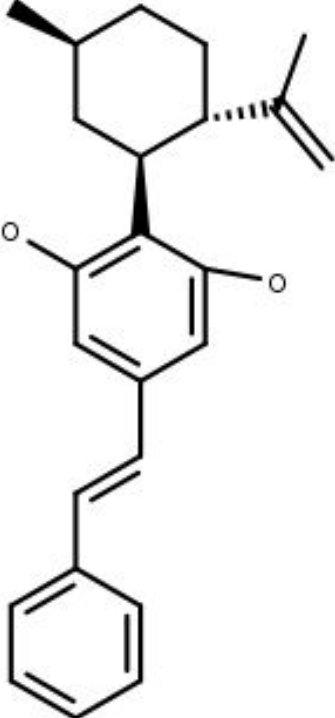 <p>The structure of Machaeridiol A consists of a cyclohexane ring substituted with a methyl group (wedge), an isopropenyl group (dotted), and a 3,5-dimethoxyphenyl group (wedge). The 3,5-dimethoxyphenyl group is connected via a propenyl chain to a phenyl ring.</p> |
| C366 | Machaeridiol B |  <p>The structure of Machaeridiol B is similar to Machaeridiol A, but the phenyl ring at the end of the propenyl chain is substituted with a methoxy group at the 3-position.</p>                                                                                       |

|      |                       |                                                                                      |
|------|-----------------------|--------------------------------------------------------------------------------------|
| C367 | Machaeridiol C        | 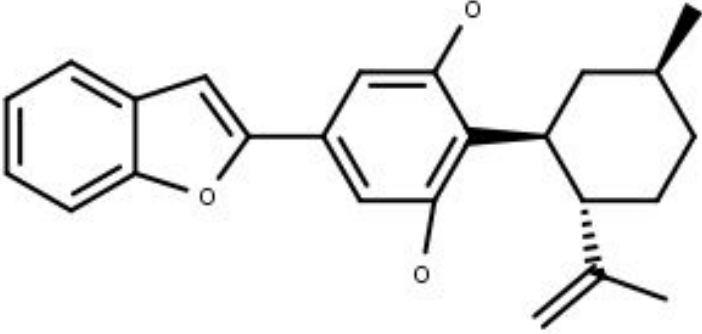   |
| C368 | Machaeridiol D        |   |
| C369 | m-Cymene              |   |
| C370 | Methacrolein          |   |
| C371 | Methacrylic anhydride |  |

|      |                         |                                                                                     |
|------|-------------------------|-------------------------------------------------------------------------------------|
| C372 | Methyl acetate          | 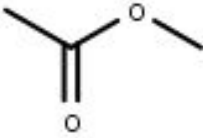   |
| C373 | Methyl acetylsalicylate |    |
| C374 | Methyl anthranilate     |   |
| C375 | Methyl Benzoate         |  |
| C376 | Methyl carbamate        |  |

|      |                     |                                                                                      |
|------|---------------------|--------------------------------------------------------------------------------------|
| C377 | Methyl heptadienone | 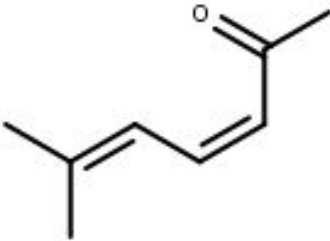    |
| C378 | Methyl heptanoate   |    |
| C379 | Methyl Hydrazine    |     |
| C380 | Methyl isoeugenol   |   |
| C381 | Methyl Salicylate   |   |
| C382 | Methyl valerate     |  |

|      |                                           |                                                                                      |
|------|-------------------------------------------|--------------------------------------------------------------------------------------|
| C383 | Methylene Chloride                        |     |
| C384 | Methylen-bis-Delta-9-tetrahydrocannabinol |    |
| C385 | Methylisohexenyl ketone                   |  |
| C386 | m-Tert-Butyl Phenol                       |   |
| C387 | Myrcene                                   |  |

|      |              |                                                                                      |
|------|--------------|--------------------------------------------------------------------------------------|
| C388 | Nerol        | 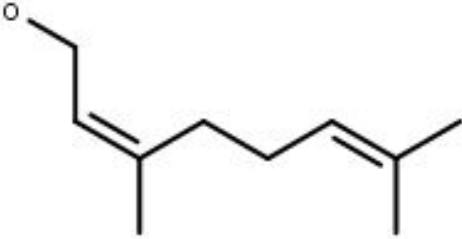   |
| C389 | Nerolidol    |    |
| C390 | Nitrobenzene |    |
| C391 | Nonanal      |  |
| C392 | Nonane       |  |

|      |                  |                                                                                                                                                                                                                                                                                                                                                                                                                                                                                                                   |
|------|------------------|-------------------------------------------------------------------------------------------------------------------------------------------------------------------------------------------------------------------------------------------------------------------------------------------------------------------------------------------------------------------------------------------------------------------------------------------------------------------------------------------------------------------|
| C393 | nor-Cannabidiol  | 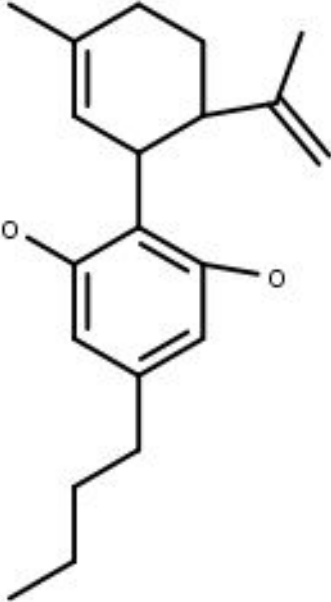 <p>The structure of nor-Cannabidiol consists of a central benzene ring with two methoxy groups (-OCH<sub>3</sub>) at the 3 and 4 positions. At the 1 position, there is a propyl chain (-CH<sub>2</sub>-CH<sub>2</sub>-CH<sub>3</sub>). At the 5 position, there is a cyclohexene ring with a methyl group at the 1-position and an isopropenyl group (-CH<sub>2</sub>-C(CH<sub>3</sub>)=CH<sub>2</sub>) at the 2-position.</p> |
| C394 | nor-Cannabinol   |  <p>The structure of nor-Cannabinol is a tricyclic system. It features a central benzene ring with a propyl chain (-CH<sub>2</sub>-CH<sub>2</sub>-CH<sub>3</sub>) at the 1-position and a methoxy group (-OCH<sub>3</sub>) at the 3-position. This ring is fused to a six-membered ring containing an oxygen atom and a methyl group. The third ring is a benzene ring with a methyl group at the 1-position.</p>              |
| C395 | nor-Cannabivarin |  <p>The structure of nor-Cannabivarin is a tricyclic system similar to nor-Cannabinol. It features a central benzene ring with a methyl group at the 1-position and a methoxy group (-OCH<sub>3</sub>) at the 3-position. This ring is fused to a six-membered ring containing an oxygen atom and a methyl group. The third ring is a benzene ring with a methyl group at the 1-position.</p>                                 |



C396

N-p-Coumaroyltyramine

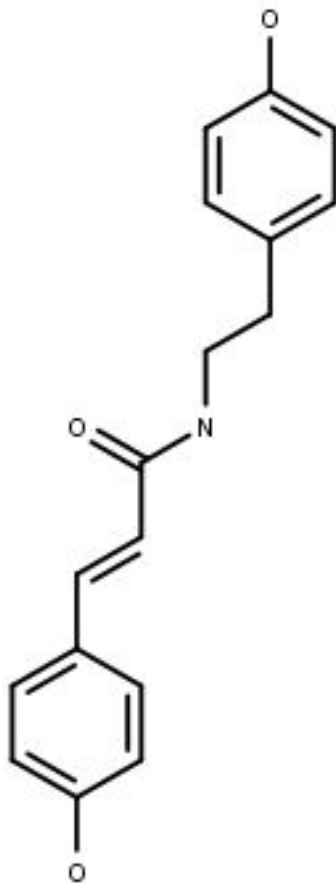

|      |                          |                                                                                                                                                                                                                                                                                                                                                                                                                                               |
|------|--------------------------|-----------------------------------------------------------------------------------------------------------------------------------------------------------------------------------------------------------------------------------------------------------------------------------------------------------------------------------------------------------------------------------------------------------------------------------------------|
| C397 | N-trans-feruloyltyramine | 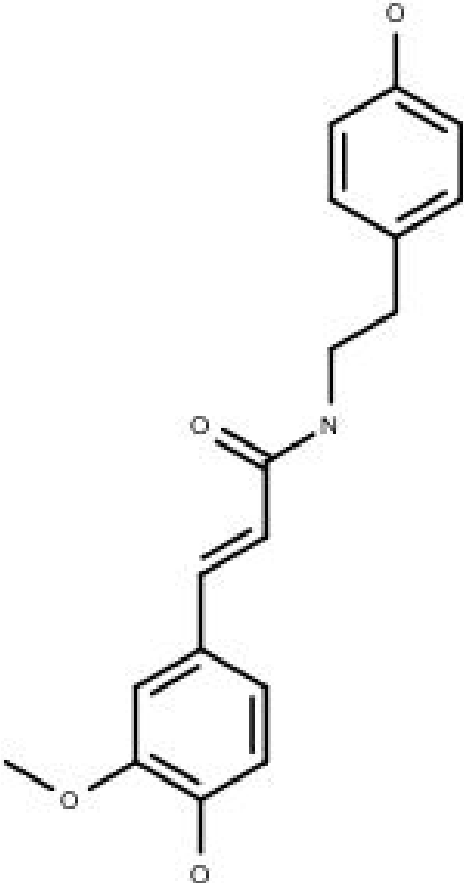 <p>The structure shows a tyramine moiety (a benzene ring with a methoxy group at the 3-position and a hydroxyl group at the 4-position) connected via a trans-alkene to a feruloyl group. The feruloyl group consists of a carbonyl group attached to a nitrogen atom, which is further connected to a propyl chain ending in a 4-hydroxyphenyl ring.</p> |
| C398 | Octanal                  |  <p>The structure is a straight-chain eight-carbon aldehyde, represented as a zigzag line with a double-bonded oxygen at the terminal end.</p>                                                                                                                                                                                                            |
| C399 | o-Cymene                 |  <p>The structure is a benzene ring with two methyl groups attached at the ortho position (1 and 2 positions).</p>                                                                                                                                                                                                                                         |
| C400 | o-Dimethyl Hydroquinone  |  <p>The structure is a benzene ring with two methoxy groups attached at the ortho position (1 and 2 positions).</p>                                                                                                                                                                                                                                        |

|      |            |                                                                                                                                                                                                                                                                             |
|------|------------|-----------------------------------------------------------------------------------------------------------------------------------------------------------------------------------------------------------------------------------------------------------------------------|
| C401 | O-Guaiacol | 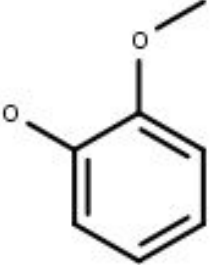 <p>The chemical structure of O-Guaiacol is a benzene ring with a methoxy group (-OCH<sub>3</sub>) at the 1-position and a hydroxyl group (-OH) at the 3-position.</p>                     |
| C402 | Oleic acid |  <p>The chemical structure of Oleic acid is a long-chain fatty acid with a carboxylic acid group at one end and a single double bond (cis configuration) in the middle of the chain.</p> |

|      |                       |                                                                                                                                                                                                                                                                                                                                                                                                                                                                                                                                     |
|------|-----------------------|-------------------------------------------------------------------------------------------------------------------------------------------------------------------------------------------------------------------------------------------------------------------------------------------------------------------------------------------------------------------------------------------------------------------------------------------------------------------------------------------------------------------------------------|
| C403 | O-Methyl Cannabigerol | 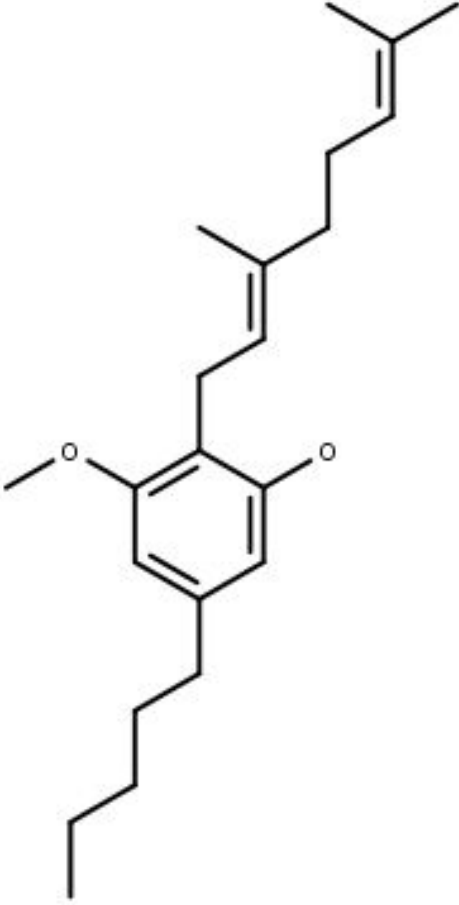 <p>The chemical structure of O-Methyl Cannabigerol (OMC) is shown. It features a central benzene ring with a methoxy group (-OCH<sub>3</sub>) at the 3-position and a hydroxyl group (-OH) at the 4-position. A pentyl chain is attached to the 1-position, and a propyl chain is attached to the 2-position. The propyl chain is part of a side chain that includes a double bond and a methyl group, forming a branched alkene structure.</p> |
| C404 | O-Methyl Acetophenone |  <p>The chemical structure of O-Methyl Acetophenone is shown. It consists of a benzene ring with a methyl group (-CH<sub>3</sub>) at the 3-position and an acetyl group (-COCH<sub>3</sub>) at the 1-position.</p>                                                                                                                                                                                                                               |

|      |                                       |                                                                                                                                                                                                                                                                                                                                                                                                                                |
|------|---------------------------------------|--------------------------------------------------------------------------------------------------------------------------------------------------------------------------------------------------------------------------------------------------------------------------------------------------------------------------------------------------------------------------------------------------------------------------------|
| C405 | O-Pentyl-cannabidiol                  | 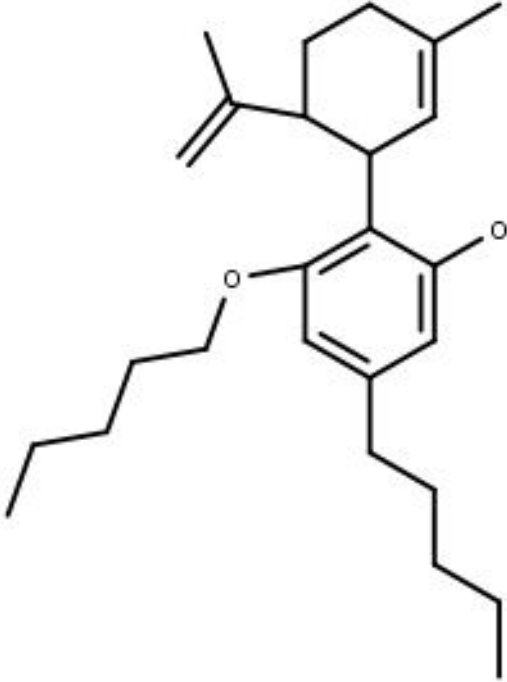 <p>The structure shows a central benzene ring with a pentyl chain at the bottom, a pentyl ether group at the top-left, and a side chain at the top-right. The side chain consists of a cyclohexene ring with a methyl group at the 1-position and a prop-1-en-2-yl group at the 2-position.</p>                                             |
| C406 | O-Pentyl-Delta-9-tetrahydrocannabinol |  <p>The structure shows a central benzene ring with a pentyl chain at the bottom-left, a pentyl ether group at the top-left, and a side chain at the top-right. The side chain consists of a cyclohexene ring with a methyl group at the 1-position and a prop-1-en-2-yl group at the 2-position, and a methyl group at the 3-position.</p> |

|      |                                       |                                                                                                                                                                                                                                                                                                                                                                      |
|------|---------------------------------------|----------------------------------------------------------------------------------------------------------------------------------------------------------------------------------------------------------------------------------------------------------------------------------------------------------------------------------------------------------------------|
| C407 | O-Propyl-cannabidiol                  | 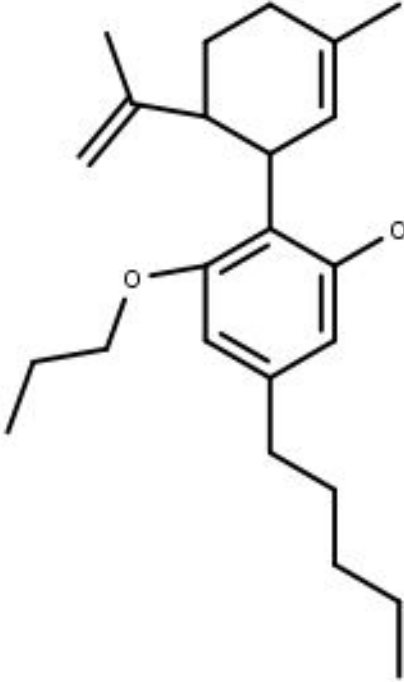 <p>The structure shows a central benzene ring with a propyl group at the 1-position, a pentyl group at the 3-position, and a 1-methyl-4-(prop-1-en-2-yl)cyclohex-1-en-1-yl group at the 5-position. There is also a small oxygen atom at the 2-position of the benzene ring.</p>  |
| C408 | O-Propyl-Delta-9-tetrahydrocannabinol |  <p>The structure shows a central benzene ring with a propyl group at the 1-position, a pentyl group at the 3-position, and a 1-methyl-4-(prop-1-en-2-yl)cyclohex-1-en-1-yl group at the 5-position. There is also a small oxygen atom at the 2-position of the benzene ring.</p> |

|      |                |                                                                                     |
|------|----------------|-------------------------------------------------------------------------------------|
| C409 | Orientin       | 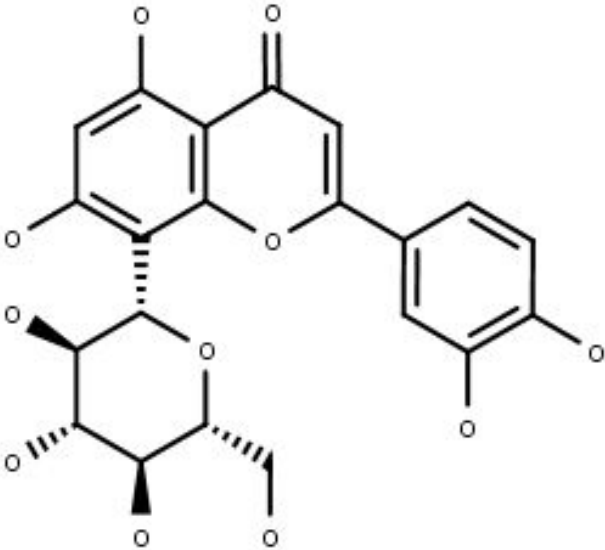  |
| C410 | O-Xylene       |   |
| C411 | P-Acetanisole  |  |
| C412 | P-Aminotoluene |  |

|      |                    |                                                                                     |
|------|--------------------|-------------------------------------------------------------------------------------|
| C413 | P-Cymene           | 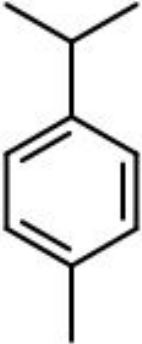   |
| C414 | Pentadecane        |   |
| C415 | Pentamethylbenzene |    |
| C416 | Pentanal           |   |
| C417 | Perillaldehyde     |  |



|      |                      |                                                                                                                                                                                                                                                                                                                                                                                                                                                                                                                                                                                                                                    |
|------|----------------------|------------------------------------------------------------------------------------------------------------------------------------------------------------------------------------------------------------------------------------------------------------------------------------------------------------------------------------------------------------------------------------------------------------------------------------------------------------------------------------------------------------------------------------------------------------------------------------------------------------------------------------|
| C418 | Perrottetinene       | 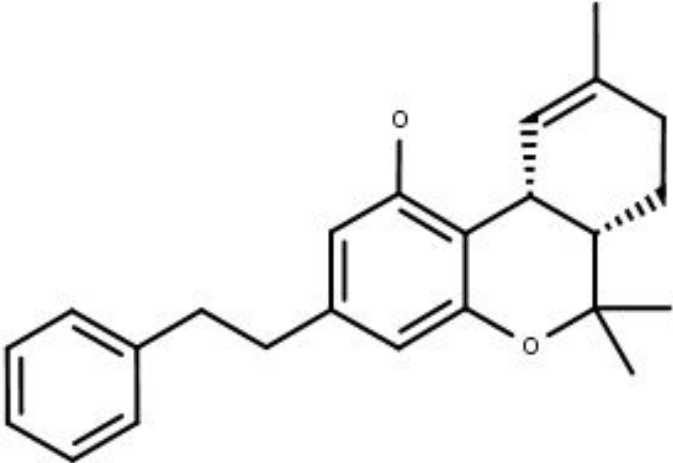 <p>The structure of Perrottetinene is a complex polycyclic molecule. It features a central benzene ring with a methoxy group (-OCH<sub>3</sub>) at the 1-position and a propylbenzyl group (-CH<sub>2</sub>-CH<sub>2</sub>-CH<sub>2</sub>-C<sub>6</sub>H<sub>5</sub>) at the 4-position. This benzene ring is fused to a six-membered ring containing an oxygen atom and a quaternary carbon atom bonded to two methyl groups. The six-membered ring is further fused to a seven-membered ring containing a double bond and a methyl group.</p> |
| C419 | Perrottetinenic acid |  <p>The structure of Perrottetinenic acid is similar to Perrottetinene but includes a carboxylic acid group (-COOH) at the 2-position of the central benzene ring. The rest of the molecule, including the propylbenzyl group and the fused rings, remains the same.</p>                                                                                                                                                                                                                                                                        |
| C420 | P-ethyl Toulene      |  <p>The structure of P-ethyl Toulene (p-ethyltoluene) is a benzene ring with an ethyl group (-CH<sub>2</sub>-CH<sub>3</sub>) at the 1-position and a methyl group (-CH<sub>3</sub>) at the 4-position.</p>                                                                                                                                                                                                                                                                                                                                      |

|      |                       |                                                                                      |
|------|-----------------------|--------------------------------------------------------------------------------------|
| C421 | Phenol                | 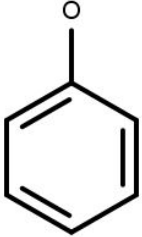    |
| C422 | Phenylethyl alcohol   |     |
| C423 | Piperidine            |    |
| C424 | Piperonal             |  |
| C425 | P-Methyl Acetophenone |   |
| C426 | Propanal              |   |

|      |                          |                                                                                     |
|------|--------------------------|-------------------------------------------------------------------------------------|
| C427 | Propofol                 | 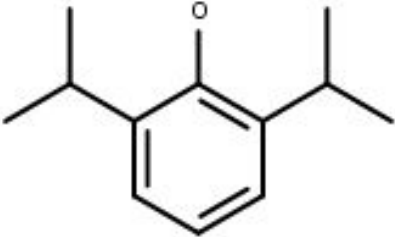  |
| C428 | Propanoic acid,anhydride |   |
| C429 | Propylamine              |    |
| C430 | Propylene Glycol         |    |
| C431 | P-Tert-Butylphenol       |  |
| C432 | P-Xylene                 |  |

|      |                        |                                                                                                                                                                                                                                                                                                                                                                                                                                            |
|------|------------------------|--------------------------------------------------------------------------------------------------------------------------------------------------------------------------------------------------------------------------------------------------------------------------------------------------------------------------------------------------------------------------------------------------------------------------------------------|
| C433 | Quercetin              | 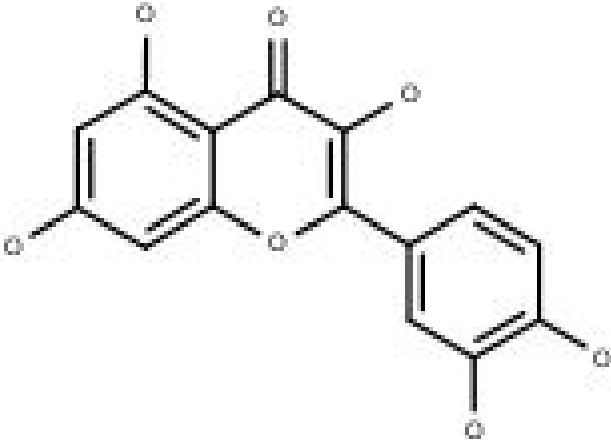 <p>The chemical structure of Quercetin is a flavonoid. It consists of a central chromone ring system. The A-ring (left) has hydroxyl groups at positions 5 and 7. The C-ring (middle) has a carbonyl group at position 4 and a hydroxyl group at position 3. The B-ring (right) is a 3,4,5-trihydroxyphenyl group.</p>                                  |
| C434 | rac-6'-Epoxycañbigerol |  <p>The chemical structure of rac-6'-Epoxycañbigerol is a stilbenoid. It features a central stilbenoid core with a 3,4,5-trihydroxyphenyl group at the 2-position and a 4-propylphenyl group at the 6-position. The 6'-position of the stilbenoid core is substituted with a 2-ethylbut-3-en-2-yl group, which is part of a racemic epoxide moiety.</p> |

|      |                                  |                                                                                                                                                                                                                                                                                                                                                                          |
|------|----------------------------------|--------------------------------------------------------------------------------------------------------------------------------------------------------------------------------------------------------------------------------------------------------------------------------------------------------------------------------------------------------------------------|
| C435 | rac-6'-Epoxy cannabigerolic acid | 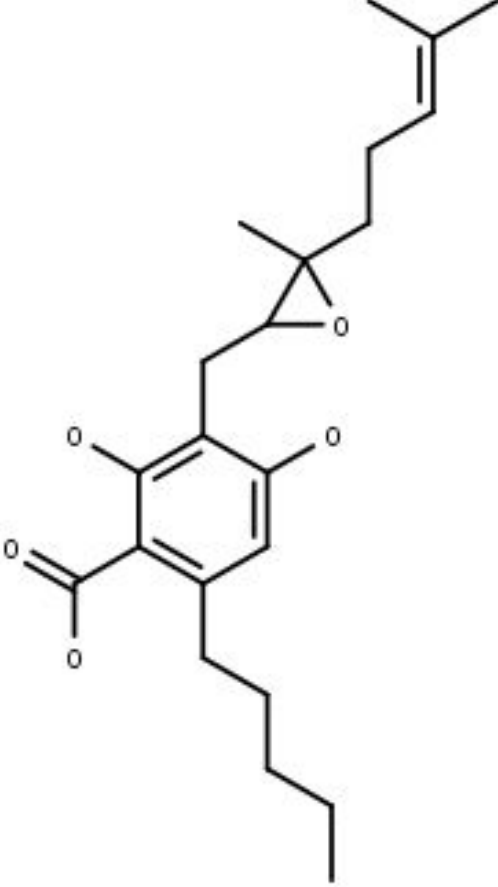 <p>The structure shows a central benzene ring with a carboxylic acid group (-COOH) at the 1-position, a propyl chain at the 3-position, and a 2-(2-oxopropyl)ethyl chain at the 4-position. The 2-oxopropyl group is an epoxide ring with a methyl group on the adjacent carbon.</p> |
| C436 | Radulanin A                      |  <p>The structure consists of a benzene ring with a carbonyl group (=O) at the 1-position, a propyl chain at the 3-position, and a 2-(2-methyl-2,5-dihydro-1H-benzofuran-5-yl)ethyl chain at the 4-position.</p>                                                                     |

|      |             |                                                                                      |
|------|-------------|--------------------------------------------------------------------------------------|
| C437 | Radulanin H | 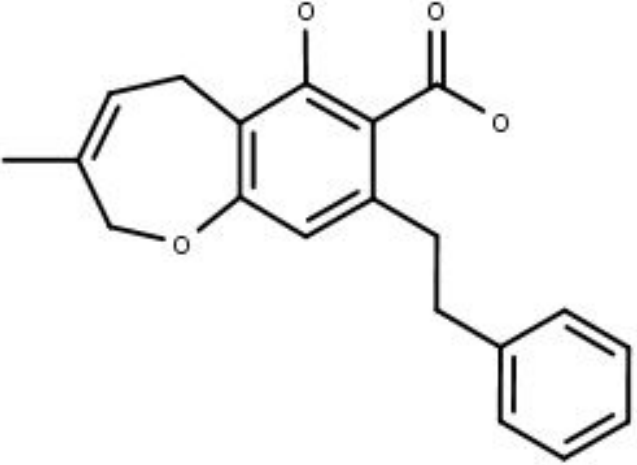   |
| C438 | Radulanin I |   |
| C439 | Radulanin J |  |

|      |                       |                                                                                                                                                                                                                                                                                                                                                                                                                                                                                                     |
|------|-----------------------|-----------------------------------------------------------------------------------------------------------------------------------------------------------------------------------------------------------------------------------------------------------------------------------------------------------------------------------------------------------------------------------------------------------------------------------------------------------------------------------------------------|
| C440 | Radulanin K           | 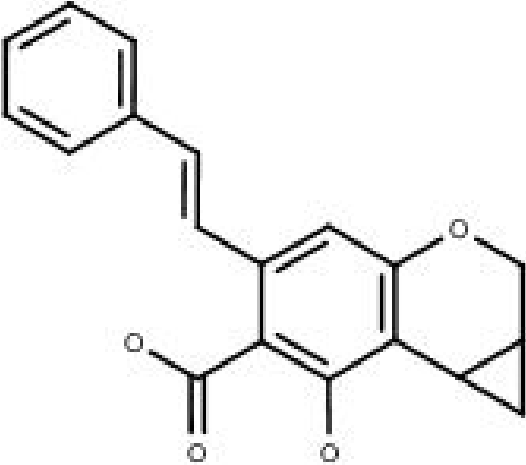 <p>The structure of Radulanin K is a complex polycyclic molecule. It features a central benzene ring fused to a bicyclic system consisting of a six-membered ring and a five-membered ring, with an oxygen atom at the bridgehead. The central benzene ring has a propenal group (-CH=CH-Ph) at the 2-position, a carbonyl group (-C(=O)-O) at the 3-position, and a hydroxyl group (-OH) at the 4-position.</p> |
| C441 | Radulanin L           |  <p>The structure of Radulanin L is a polycyclic molecule. It consists of a central benzene ring fused to a seven-membered ring containing an oxygen atom. The benzene ring has a hydroxyl group (-OH) at the 1-position and a propyl chain (-CH2-CH2-CH2-) at the 4-position. The propyl chain is further substituted with a 2-hydroxyphenyl group (-CH2-Ph-OH) at the end.</p>                                 |
| C442 | Rhododaurichromanic A |  <p>A placeholder image consisting of a red 'X' inside a gray-bordered box, indicating that the chemical structure for Rhododaurichromanic A is missing or unavailable.</p>                                                                                                                                                                                                                                      |

|      |                 |                                                                                     |
|------|-----------------|-------------------------------------------------------------------------------------|
| C443 | Roughanic acid  | 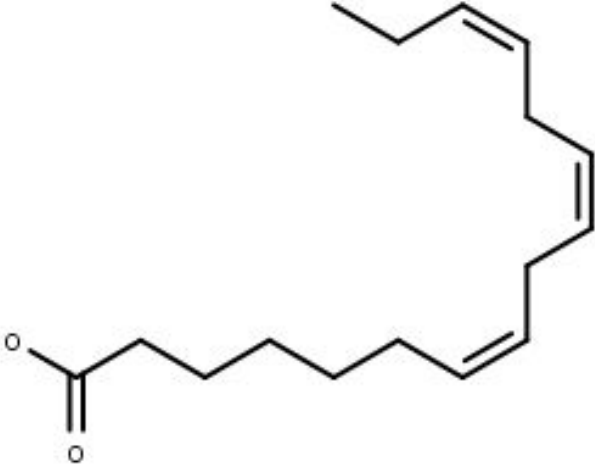  |
| C444 | Sabinene        |   |
| C445 | Salicylaldehyde |  |
| C446 | Sativene        |  |



|      |                    |                                                                                                                                                                                                                                                                                                                                                                                                                                                                                                                                                                                                                    |
|------|--------------------|--------------------------------------------------------------------------------------------------------------------------------------------------------------------------------------------------------------------------------------------------------------------------------------------------------------------------------------------------------------------------------------------------------------------------------------------------------------------------------------------------------------------------------------------------------------------------------------------------------------------|
| C447 | Sesquicannabigerol | 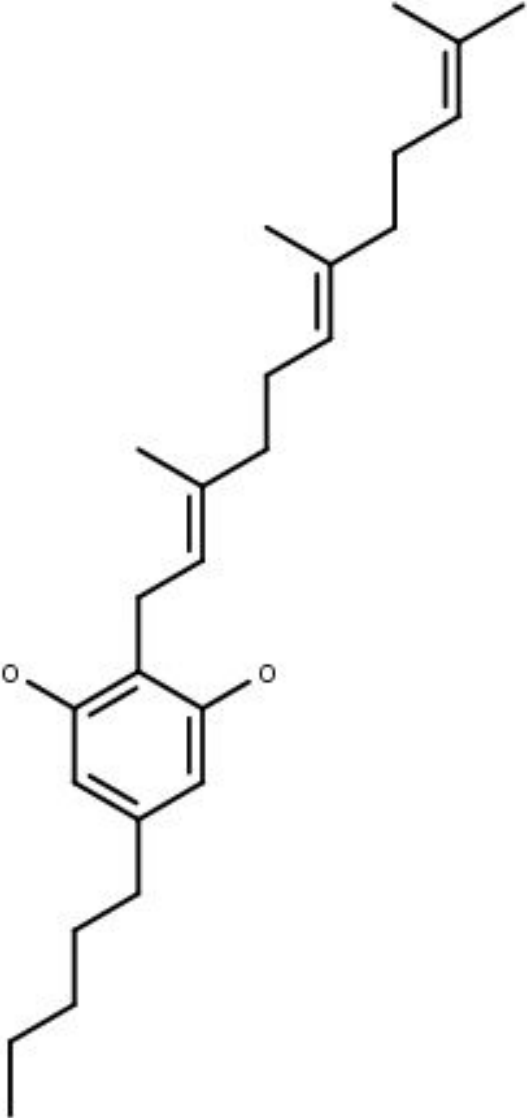 <p>The chemical structure of Sesquicannabigerol (C447) is a sesquiterpene. It features a central benzene ring with two oxygen atoms at the 1 and 3 positions. Attached to the ring are three side chains: a propyl chain at the 4-position, a propyl chain at the 5-position, and a branched chain at the 2-position. The branched chain consists of a propyl group connected to a double bond, which is further substituted with a methyl group and a propyl group, ending in another double bond with two methyl groups.</p> |
| C448 | Stearidonic acid   |  <p>The chemical structure of Stearidonic acid (C448) is a long-chain polyunsaturated fatty acid. It consists of a carboxylic acid group at one end, followed by a long hydrocarbon chain containing four double bonds in a conjugated system.</p>                                                                                                                                                                                                                                                                             |

|      |                    |                                                                                     |
|------|--------------------|-------------------------------------------------------------------------------------|
| C449 | Styrene            | 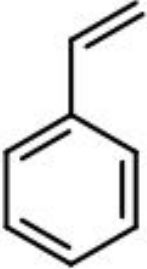   |
| C450 | Tert-butyl alcohol |    |
| C451 | Terpinolene        |   |
| C452 | tert-butyl-benzene |  |

|      |                              |                                                                                                                                                                                                                                                                                                                                                                                                                                                                                                                                                                  |
|------|------------------------------|------------------------------------------------------------------------------------------------------------------------------------------------------------------------------------------------------------------------------------------------------------------------------------------------------------------------------------------------------------------------------------------------------------------------------------------------------------------------------------------------------------------------------------------------------------------|
| C453 | Tetrahydrocannabinol epoxide | 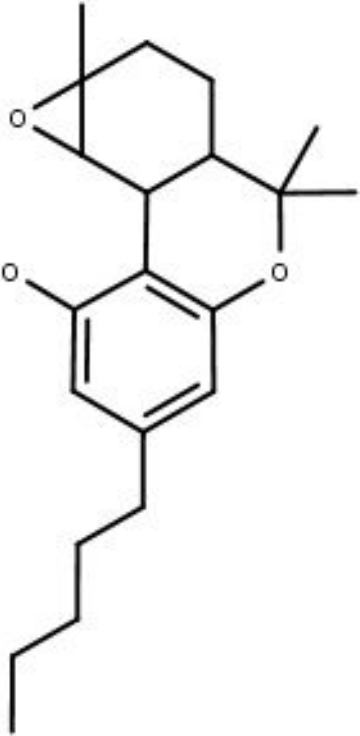 <p>The structure shows a bicyclic system consisting of a cyclohexane ring fused to a benzene ring. The cyclohexane ring has an epoxide group (a three-membered ring with an oxygen atom) on one side and a quaternary carbon atom with two methyl groups on the other. The benzene ring has two methoxy groups (-OCH<sub>3</sub>) at the 1 and 3 positions and a pentyl chain (-CH<sub>2</sub>CH<sub>2</sub>CH<sub>2</sub>CH<sub>2</sub>CH<sub>3</sub>) at the 4 position.</p> |
| C454 | Tetrahydrozoline             |  <p>The structure shows a benzene ring fused to a cyclohexane ring. The cyclohexane ring is substituted with a tetrahydroimidazole ring (a five-membered ring with two nitrogen atoms) at the 1 position.</p>                                                                                                                                                                                                                                                                  |
| C455 | Thymol                       |  <p>The structure shows a benzene ring with a methyl group (-CH<sub>3</sub>) at the 1 position, an isopropyl group (-CH<sub>2</sub>CH(CH<sub>3</sub>)<sub>2</sub>) at the 3 position, and a methoxy group (-OCH<sub>3</sub>) at the 4 position.</p>                                                                                                                                                                                                                           |

|      |                       |                                                                                    |
|------|-----------------------|------------------------------------------------------------------------------------|
| C456 | Toluene               | 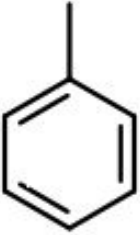  |
| C457 | Trans-alpha-farnesene |  |
| C458 | Trans-Archidin-1      |  |

|      |                        |                                                                                      |
|------|------------------------|--------------------------------------------------------------------------------------|
| C459 | Trans-Archidin-2       | 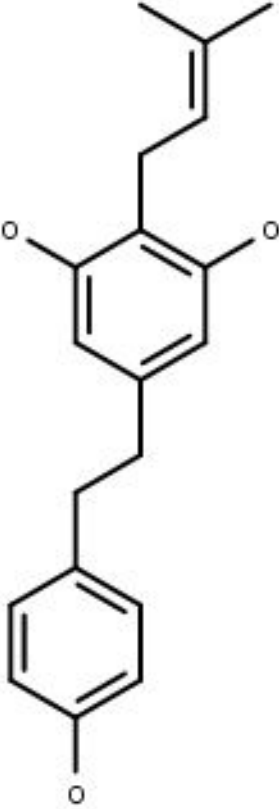   |
| C460 | Trans-gamma-bisabolene |   |
| C461 | Trans-ocimene          |  |

|      |           |                                                                                     |
|------|-----------|-------------------------------------------------------------------------------------|
| C462 | Tridecane |   |
| C463 | Tyramine  |    |
| C464 | Undecane  |   |
| C465 | Valencene |   |
| C466 | Verbenone |  |

|      |                          |                                                                                                                                                                                                                                                                                                                                                                                                                                                            |
|------|--------------------------|------------------------------------------------------------------------------------------------------------------------------------------------------------------------------------------------------------------------------------------------------------------------------------------------------------------------------------------------------------------------------------------------------------------------------------------------------------|
| C467 | Vitexin                  | 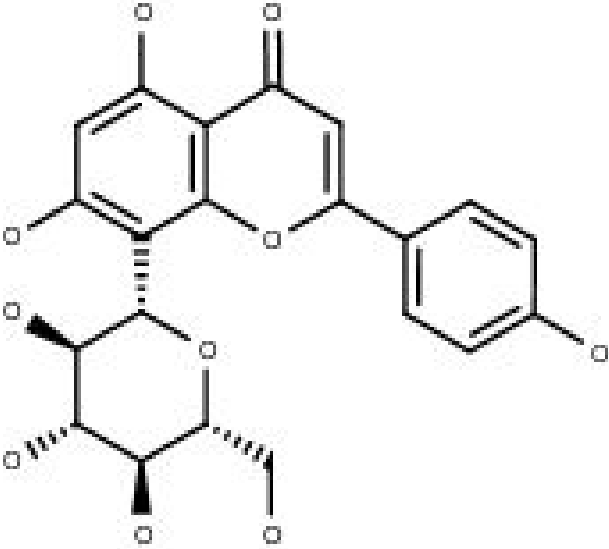 <p>The structure of Vitexin is a flavonoid glycoside. It consists of a flavone aglycone core (vitexin) linked to a glucose molecule at the 7-position. The flavone core has a 4-hydroxyphenyl group at the 2-position and hydroxyl groups at the 5 and 7 positions. The glucose molecule is in its pyranose form with hydroxyl groups at the 2, 3, and 6 positions.</p> |
| C468 | N-trans-caffeoyltyramine |  <p>The structure of N-trans-caffeoyltyramine is a tyramine derivative. It features a tyramine backbone (2-phenylethylamine) where the nitrogen atom is substituted with a trans-caffeoyl group. The caffeine moiety consists of a 3,4-dihydroxyphenyl ring attached to a propenoic acid chain, which is in its trans configuration.</p>                                |
